# Supplementary material for: Web-based mindfulness and skills-based distress reduction for patients with cancer: study protocol of the multicentre, randomised, controlled confirmatory intervention trial Reduct
Source: PubMed Central journal article supplement — BMJ Open. 2022 Jun 1;12(6):e056973. doi: 10.1136/bmjopen-2021-056973 (PMC9161102; doi:10.1136/bmjopen-2021-056973), 2022-06-01
Supplement: bmjopen-2021-056973.draft_revisions.pdf [file bmjopen-2021-056973.draft_revisions.pdf]

# BMJ Open

BMJ Open is committed to open peer review. As part of this commitment we make the peer review history of every article we publish publicly available.

When an article is published we post the peer reviewers' comments and the authors' responses online. We also post the versions of the paper that were used during peer review. These are the versions that the peer review comments apply to.

The versions of the paper that follow are the versions that were submitted during the peer review process. They are not the versions of record or the final published versions. They should not be cited or distributed as the published version of this manuscript.

BMJ Open is an open access journal and the full, final, typeset and author-corrected version of record of the manuscript is available on our site with no access controls, subscription charges or pay-per-view fees (<http://bmjopen.bmj.com>).

If you have any questions on BMJ Open's open peer review process please email [info.bmjopen@bmj.com](mailto:info.bmjopen@bmj.com)

# BMJ Open

## Web-based Mindfulness and Skills Based Distress Reduction for Cancer Patients - Study Protocol of the Multicentre, Randomized, Controlled Confirmatory Intervention Trial Reduct

|                               |                                                                                                                                                                                                                                                                                                                                                                                                                                                                                                                                                                                                                                                                                                                                                                                                                                                                                                                                                                                                                                                                                                                                                                                                                                                                                                                                                                                                                                                                                                                                                                                                                                                                                                                                                                                                                                                                                                                                                                                                                                                                                                                                                                                                                                                                                     |
|-------------------------------|-------------------------------------------------------------------------------------------------------------------------------------------------------------------------------------------------------------------------------------------------------------------------------------------------------------------------------------------------------------------------------------------------------------------------------------------------------------------------------------------------------------------------------------------------------------------------------------------------------------------------------------------------------------------------------------------------------------------------------------------------------------------------------------------------------------------------------------------------------------------------------------------------------------------------------------------------------------------------------------------------------------------------------------------------------------------------------------------------------------------------------------------------------------------------------------------------------------------------------------------------------------------------------------------------------------------------------------------------------------------------------------------------------------------------------------------------------------------------------------------------------------------------------------------------------------------------------------------------------------------------------------------------------------------------------------------------------------------------------------------------------------------------------------------------------------------------------------------------------------------------------------------------------------------------------------------------------------------------------------------------------------------------------------------------------------------------------------------------------------------------------------------------------------------------------------------------------------------------------------------------------------------------------------|
| Journal:                      | <i>BMJ Open</i>                                                                                                                                                                                                                                                                                                                                                                                                                                                                                                                                                                                                                                                                                                                                                                                                                                                                                                                                                                                                                                                                                                                                                                                                                                                                                                                                                                                                                                                                                                                                                                                                                                                                                                                                                                                                                                                                                                                                                                                                                                                                                                                                                                                                                                                                     |
| Manuscript ID                 | bmjopen-2021-056973                                                                                                                                                                                                                                                                                                                                                                                                                                                                                                                                                                                                                                                                                                                                                                                                                                                                                                                                                                                                                                                                                                                                                                                                                                                                                                                                                                                                                                                                                                                                                                                                                                                                                                                                                                                                                                                                                                                                                                                                                                                                                                                                                                                                                                                                 |
| Article Type:                 | Protocol                                                                                                                                                                                                                                                                                                                                                                                                                                                                                                                                                                                                                                                                                                                                                                                                                                                                                                                                                                                                                                                                                                                                                                                                                                                                                                                                                                                                                                                                                                                                                                                                                                                                                                                                                                                                                                                                                                                                                                                                                                                                                                                                                                                                                                                                            |
| Date Submitted by the Author: | 01-Sep-2021                                                                                                                                                                                                                                                                                                                                                                                                                                                                                                                                                                                                                                                                                                                                                                                                                                                                                                                                                                                                                                                                                                                                                                                                                                                                                                                                                                                                                                                                                                                                                                                                                                                                                                                                                                                                                                                                                                                                                                                                                                                                                                                                                                                                                                                                         |
| Complete List of Authors:     | <p>Bäuerle, Alexander; University of Duisburg-Essen, Clinic for Psychosomatic Medicine and Psychotherapy, LVR-University Hospital; University Hospital Essen, Comprehensive Cancer Center (CCC)</p> <p>Martus, Peter; University Hospital Tübingen, Institute of Clinical Epidemiology and Applied Biostatistics, Eberhard Karls University Tübingen</p> <p>Erim, Yesim; University Hospital Erlangen, Department of Psychosomatic Medicine and Psychotherapy, Friedrich-Alexander-University Erlangen-Nürnberg</p> <p>Schug, Caterina; University Hospital Erlangen, Department of Psychosomatic Medicine and Psychotherapy, Friedrich-Alexander-University Erlangen-Nürnberg</p> <p>Heinen, Jana; University Hospital Tübingen, Department of Psychosomatic Medicine and Psychotherapy, Eberhard Karls University; University Hospital Tübingen, Comprehensive Cancer Center (CCC)</p> <p>Steinbach, Jasmin; University of Duisburg-Essen, Clinic for Psychosomatic Medicine and Psychotherapy, LVR-University Hospital; University Hospital Essen, Comprehensive Cancer Center (CCC)</p> <p>Damerau, Mirjam; University of Duisburg-Essen, Clinic for Psychosomatic Medicine and Psychotherapy, LVR-University Hospital; University Hospital Essen, Comprehensive Cancer Center (CCC)</p> <p>Bethge, Wolfgang; University Hospital Tübingen, Centre of Clinical Trials (ZKS) Tübingen, Eberhard Karls University Tübingen</p> <p>Dinkel, Andreas; Technical University of Munich, Department of Psychosomatic Medicine and Psychotherapy, Klinikum rechts der Isar, School of Medicine</p> <p>Dries, Sebastian; Fraunhofer Institute for Software and Systems Engineering, Healthcare Department</p> <p>Mehnert, Anja ; University Medical Center Leipzig, Department of Medical Psychology and Medical Sociology</p> <p>Neumann, Anja; University of Duisburg-Essen, Institute of Health Care Management and Research</p> <p>Schadendorf, Dirk; University Hospital Essen, Department of Dermatology, University of Duisburg-Essen; University Hospital Essen, Comprehensive Cancer Center (CCC)</p> <p>Tewes, Mitra; University Hospital Essen, Department of Medical Oncology, University of Duisburg-Essen; University Hospital Essen, Comprehensive Cancer Center (CCC)</p> |

|           |                                                                                                                                                                                                                                                                                                                                                                                                                                                                                                                                                                                                                                                                                                                                                                                                                                                                                          |
|-----------|------------------------------------------------------------------------------------------------------------------------------------------------------------------------------------------------------------------------------------------------------------------------------------------------------------------------------------------------------------------------------------------------------------------------------------------------------------------------------------------------------------------------------------------------------------------------------------------------------------------------------------------------------------------------------------------------------------------------------------------------------------------------------------------------------------------------------------------------------------------------------------------|
|           | Wiltink, Jörg; University Medical Center of the Johannes Gutenberg-University Mainz, Department of Psychosomatic Medicine and Psychotherapy<br>Wünsch, Alexander; Freiburg Medical Center, Clinic for Psychosomatic Medicine and Psychotherapy, Albert-Ludwigs-Universität Freiburg<br>Zipfel, Stephan; University Hospital Tübingen, Department of Psychosomatic Medicine and Psychotherapy, Eberhard Karls University ; University Hospital Tübingen, Comprehensive Cancer Center (CCC)<br>Graf, Johanna; University Hospital Tübingen, Department of Psychosomatic Medicine and Psychotherapy, Eberhard Karls University; University Hospital Tübingen, Comprehensive Cancer Center (CCC)<br>Teufel, Martin; University of Duisburg-Essen, Clinic for Psychosomatic Medicine and Psychotherapy, LVR-University Hospital; University Hospital Essen, Comprehensive Cancer Center (CCC) |
| Keywords: | ONCOLOGY, Telemedicine < BIOTECHNOLOGY & BIOINFORMATICS, MENTAL HEALTH                                                                                                                                                                                                                                                                                                                                                                                                                                                                                                                                                                                                                                                                                                                                                                                                                   |
|           |                                                                                                                                                                                                                                                                                                                                                                                                                                                                                                                                                                                                                                                                                                                                                                                                                                                                                          |

SCHOLARONE™  
Manuscripts

1  
2  
3 **Web-based Mindfulness and Skills Based Distress Reduction for Cancer Patients**  
4 **- Study Protocol of the Multicentre, Randomized, Controlled Confirmatory**  
5 **Intervention Trial Reduct**  
6  
7

8  
9 Alexander Bäuerle<sup>1,2</sup>, Peter Martus<sup>3</sup>, Yesim Erim<sup>4</sup>, Caterina Schug<sup>4</sup>, Jana Heinen<sup>5,6</sup>,  
10 Jasmin Steinbach<sup>1,2</sup>, Mirjam Damerau<sup>1,2</sup>, Wolfgang Bethge<sup>7</sup>, Andreas Dinkel<sup>8</sup>, Sebastian  
11 Dries<sup>9</sup>, Anja Mehnert-Theuerkauf<sup>10</sup>, Anja Neumann<sup>11</sup>, Dirk Schadendorf<sup>12,2</sup>, Mitra  
12 Tewes<sup>13,2</sup>, Jörg Wiltink<sup>14</sup>, Alexander Wunsch<sup>15</sup>, Stephan Zipfel<sup>5,6</sup>, Johanna Graf<sup>5,6+</sup>, Martin  
13 Teufel<sup>1,2+\*</sup>  
14  
15  
16

17  
18 <sup>1</sup>University of Duisburg-Essen, Clinic for Psychosomatic Medicine and Psychotherapy, LVR-  
19 University Hospital Essen  
20

21  
22 <sup>2</sup>University Hospital Essen, Comprehensive Cancer Center (CCC)  
23

24  
25 <sup>3</sup>Institute of Clinical Epidemiology and Applied Biostatistics (IKEaB), University Hospital  
26 Tübingen, Eberhard Karls University Tübingen  
27  
28

29  
30 <sup>4</sup>Department of Psychosomatic Medicine and Psychotherapy, University Hospital Erlangen,  
31 Friedrich-Alexander-University Erlangen-Nürnberg  
32

33  
34 <sup>5</sup>Department of Psychosomatic Medicine and Psychotherapy, University Hospital  
35 Tübingen, Eberhard Karls University  
36  
37

38  
39 <sup>6</sup>University Hospital Tübingen, Comprehensive Cancer Center (CCC)  
40

41  
42 <sup>7</sup>Centre of Clinical Trials (ZKS) Tübingen, University Hospital Tübingen, Eberhard Karls  
43 University Tübingen  
44

45  
46 <sup>8</sup>Department of Psychosomatic Medicine and Psychotherapy, Klinikum rechts der Isar,  
47 School of Medicine, Technical University of Munich  
48  
49

50  
51 <sup>9</sup>Fraunhofer Institute for Software and Systems Engineering, Healthcare Department  
52

53  
54 <sup>10</sup>Department of Medical Psychology and Medical Sociology, University Medical Center  
55 Leipzig  
56  
57

58  
59 <sup>11</sup>University of Duisburg-Essen, Institute of Health Care Management and Research  
60



1  
2  
3 <sup>12</sup>Department of Dermatology, University Hospital Essen, University of Duisburg-Essen  
4  
5

6 <sup>13</sup>Department of Medical Oncology, University Hospital Essen, University of Duisburg-  
7 Essen  
8  
9

10 <sup>14</sup>Department of Psychosomatic Medicine and Psychotherapy, University Medical Center of  
11 the Johannes Gutenberg- University Mainz  
12  
13

14 <sup>15</sup>Clinic for Psychosomatic Medicine and Psychotherapy, Freiburg Medical Center, Albert-  
15 Ludwigs-Universität Freiburg  
16  
17

18  
19  
20 +JG and MT contributed equally.  
21

22  
23 \*Corresponding author: Martin Teufel, University of Duisburg-Essen, Clinic for  
24 Psychosomatic Medicine and Psychotherapy, LVR-University Hospital Essen,  
25 martin.teufel@uni-due.de  
26  
27

## 28 29 **Abstract**

30 Introduction: Many cancer patients experience severe distress, but as a result of various  
31 barriers, few of them receive psycho-oncological support. E-mental health interventions  
32 try to overcome some of these barriers and the limitation of health-care offers, enabling  
33 cancer patients to better cope with disease-related distress. In the proposed trial, we aim  
34 to estimate the efficacy and cost-effectiveness of the manualized e-mental health  
35 intervention Make It Training- Mindfulness- and Skills-Based Distress Reduction in  
36 Oncology. We expect the Make It Training to be superior to treatment as usual optimized  
37 (TAU-O) in terms of reducing distress at T1 (primary endpoint).  
38  
39

40 Methods and analysis: The study comprises a multicentre, prospective, randomized  
41 controlled confirmatory interventional trial with two parallel arms. The proposed trial  
42 incorporates four distinct measurement time points: the baseline assessment before  
43 randomization, a post-treatment assessment, and three- and six-month follow-up  
44 assessments. We will include patients who have received a cancer diagnosis in the past 12  
45 months, are in a curative treatment setting, 18-65 years old, have given informed consent,  
46 and experience high perceived distress (Hospital Anxiety and Depression Scale  $\geq 13$ ) for  
47 at least one week. Patients will be randomized into two groups (Make It vs. TAU-O). The  
48 aim is to allocate 600 cancer patients and include 556 into the intention to treat analysis.  
49 The primary endpoint, distress, will be analysed using a baseline-adjusted ANCOVA for  
50 distress measurement once the intervention (T1) has been completed, with study arm as  
51 binary factor, baseline as continuous measurement, and study centre as an additional  
52 categorical covariate.  
53  
54  
55  
56  
57  
58  
59  
60

1  
2  
3 Ethics and dissemination: The Ethics Committee of the Medical Faculty Essen has approved  
4 the study (21-10076-BO). Results will be published in peer-reviewed journals, conference  
5 presentations, the project website, and among self-help organizations.  
6

7 Trial registration: The Reduct trial is registered at the German Clinical Trial Register (DRKS)  
8 under the DRKS-ID: DRKS00025213.  
9  
10

### 11 **Strength and limitation of this study**

- 12 - This prospective multicentre, randomized, controlled confirmatory intervention trial was
- 13 developed using scientific evidence, theory and person-based practically orientated
- 14 approaches.
- 15 - The intervention of this study provides low-threshold, time- and cost-effective support.
- 16 - The study only includes patients with access to the internet as access is required in the
- 17 intervention.
- 18
- 19
- 20
- 21
- 22
- 23

### 24 **Introduction**

25 In 2020, there were an estimated number of 19.3 million new cancer cases and almost  
26 10.0 million cancer deaths occurred worldwide.[1] Many cancer patients experience  
27 multiple physical and psychosocial problems during the course of treatment and even for  
28 years afterward.[2] Every second cancer patient is significantly distressed and one third of  
29 all cancer patients across tumour entities meets the criteria for at least one mental disorder  
30 at 4-week prevalence.[3, 4] In cancer patients, distress strongly affects all aspects of their  
31 lives (e.g., work life, family life), leads to decreased quality of life, causes financial  
32 problems, and results in a 4.4-fold higher risk of suicide compared to the general  
33 population.[5-7] In addition, adherence to cancer treatment can decrease due to severe  
34 distress.[8]

35 Cancer patients who used e-mental health interventions experienced significantly reduced  
36 levels of distress, depression, pain, fatigue, and anxiety.[9-17] E-mental health  
37 interventions have proven to be feasible and effective in improving quality of life.[9-17]  
38 Recent scientific findings extend their effectiveness by suggesting significant effects on  
39 well-being in terms of distress, depression, and anxiety,[10, 15-19] especially for web-  
40 based interventions that included cognitive behavioural therapy (CBT) techniques [9-14,  
41 16, 18, 20] or mindfulness-based stress reduction (MBSR).[16, 17, 19, 21] To date, no  
42 RCT (randomized controlled trial) has been conducted on self-guided, e-mental health  
43 interventions including both CBT and MBSR for patients with cancer. In addition, two recent  
44 reviews on e-mental health interventions in (i) patients with breast cancer and (ii) young  
45 adult patients emphasized the impact of e-mental health interventions and stressed the  
46 need for well-designed multicentre RCTs.[22, 23] Based on these findings, we propose to  
47 conduct the first multicentre prospective RCT on the efficacy of a self-guided e-mental  
48 health intervention Make It Training - Mindfulness and Skills Based Distress Reduction  
49  
50  
51  
52  
53  
54  
55  
56  
57  
58  
59  
60

1  
2  
3 Training in Oncology, tailored to reduce distress and achieve well-being in patients with  
4 cancer.  
5  
6

### 7 **Objectives and hypotheses**

9 The objective of the proposed trial is to address distress in cancer patients and provide a  
10 low-threshold, cost-effective approach in the form of an e-mental health intervention. Our  
11 aim is to assess the efficacy of the e-mental health intervention Make It Training compared  
12 to treatment as usual optimized (TAU-O) in distressed cancer patients.  
13  
14

16 *Primary hypothesis:* We expect the Make It Training to be superior to TAU-O in terms of  
17 reducing distress (T1) in cancer patients.  
18

19 *Secondary hypotheses:* We expect the Make It Training to be superior to TAU-O in terms  
20 of improving self-efficacy, quality of life and mindfulness and to reduce depression and  
21 anxiety symptoms (T1, T2 & T3) as well as distress (T2 & T3) in patients with cancer.  
22

23 *Other study goals* are to evaluate client satisfaction, usability, time to dropout and cost-  
24 effectiveness of the proposed intervention Make It Training compared to TAU-O.  
25 Furthermore, additional study aims are to establish and improve healthy coping  
26 mechanisms in cancer patients and explore predictors of usage as well as analyse the  
27 usage behaviour of the Make It Training.  
28  
29  
30  
31  
32

### 33 **Methods**

34 This study protocol (Version 1.0; August 31st, 2021) is reported according to the SPIRIT  
35 checklist (see supplementary material I).[24] In case of important protocol modification  
36 will be reported to the sponsor (Federal Ministry of Education and Research), the ethics  
37 committees of the participating centres, and the trial registration will be updated.  
38  
39  
40  
41

#### 42 *Study design*

43 The study comprises a multicentre, prospective, randomized controlled confirmatory  
44 interventional trial with two parallel arms. The proposed trial incorporates four distinct  
45 measurement time points (see Table 1 and Figure 1): the baseline assessment (T0) before  
46 randomization, a post-treatment assessment (T1), and three- and six-month follow-up  
47 assessments (T2 & T3). Additionally, continuous assessments are planned during the  
48 experimental intervention (in-treatment assessment; usage behaviour, distress,  
49 depression and anxiety symptoms, mindfulness, and self-efficacy). For the control group,  
50 data assessment during the control intervention (in-treatment assessments) is limited to  
51 measurement of distress, depression and anxiety symptoms. The medical data are taken  
52 from the patient's medical records at T0. Changes in the medical conditions of the patients  
53 will be continually assessed. Participants who drop out (no login for six weeks is considered  
54 as a dropout) will be contacted (if written permission for this purpose has been given before  
55  
56  
57  
58  
59  
60

1  
2  
3 trial start) and asked to complete a dropout assessment. Before participation, written  
4 informed consent must be given. Table 1 displays the instruments used at each time point.  
5  
6  
7  
8  
9  
10  
11  
12  
13  
14  
15  
16

17 ----- Please, insert Figure 1 here -----  
18  
19  
20  
21  
22  
23  
24  
25  
26  
27  
28  
29  
30  
31

### 32 *Participant eligibility and recruitment*

33 We set the key inclusion and exclusion criteria in line with comparable and recent studies  
34 in psycho-oncology.[9, 10, 25] Participants will be included if they have a confirmed  
35 diagnosis of cancer in the past 12 months (initial diagnosis or recurrence), are engaged in  
36 a curative treatment setting, have an age of 18-65 years, high perceived distress (HADS  
37  $\geq 13$ ) for at least one week, and have given their informed consent.  
38  
39

40 Patients with severe cognitive impairment and/or communication difficulties that  
41 compromise participation in the intervention, acute risk for suicide and/or severe  
42 depression according to clinical practice guidelines, other psychiatric or medical conditions  
43 requiring alternative treatment, known cerebral metastases, an age of  $> 65$ , no private  
44 internet access, and/or regularly contacting a mental health specialist will be excluded. We  
45 defined an age of more than 65 years as exclusion criteria, because a German survey  
46 analyzing the internet literacy of cancer patients determined that while no significant  
47 differences regarding gender or age were seen, most of the cancer patients were younger  
48 than 70 years old. [26]  
49  
50  
51  
52  
53  
54  
55

56 The seven academic centers, which are involved in the recruitment, are: University Hospital  
57 Essen, University Hospital Tübingen, University Hospital Erlangen, Freiburg University  
58 Hospital, University Medical Center Leipzig, University Medical Center of the Johannes  
59 Gutenberg – University Mainz, Klinikum rechts der Isar of the Technical University of  
60

1  
2  
3 Munich. Participants are going to be recruited by study personnel and involved clinic  
4 personnel. Flyers and posters will be spread. In addition, information about the study and  
5 the involved staff will be presented online via social media and the study homepage  
6 (reduct-studie.de). Interested patients have the possibility to ask questions regarding the  
7 study, e.g. its design and inclusion/exclusion criteria via E-Mail, phone or in persona.  
8  
9  
10

### 11 *Intervention*

12 Eligible patients will be randomly assigned to either the experimental intervention or the  
13 control condition TAU-O. Both interventions last four months.

14  
15 *Experimental intervention: Make It Training.* The psycho-oncological Make It Training is a  
16 self-guided and patient-oriented e-mental health intervention for cancer patients to  
17 overcome distress and improve their well-being. The Make It Training is based on the  
18 established, effective psychotherapeutic intervention techniques of MBSR, CBT, and  
19 acceptance and commitment therapy approaches used during the treatment of cancer  
20 patients. It aims to improve emotion management, mental strength, psychological  
21 resources, distress management, and self-efficacy. The modules of the intervention involve  
22 various media, including tutorial videos, audio-guided mindfulness exercises, individual  
23 skills boxes, and interactive skills training. Furthermore, at the end of each module,  
24 patients receive an individual summary of the finished module with individual results, a  
25 mindfulness exercise plan, and motivational notifications. During the training, patients  
26 collect helpful skills and exercises in their individual skills box. Each Make It module is  
27 conceptualized to be completed over the course of one week; after one week, the next  
28 module is delivered and trained. The patient is encouraged to focus on individually relevant  
29 issues, as each module starts with a short self-evaluation of current distress level, skills  
30 and mindfulness. The intervention also involves homework assignments and MBSR  
31 exercises that should be integrated into the cancer patients' daily routines. The training  
32 can be conducted on the patients' private PC, tablet, or smartphone. Downloaded material  
33 can be used offline. Eight optional modules as well as one technical introduction module  
34 complement the eight bi-weekly mandatory modules, each lasting about 30 minutes.  
35  
36  
37  
38  
39  
40  
41  
42  
43  
44  
45  
46  
47

48  
49 *Control intervention: Treatment as Usual optimized.* In the proposed RCT, the intervention  
50 group will be compared with an active control group as a placebo or null intervention control  
51 group would be ethically inappropriate. This refers to (i) standard psycho-oncological  
52 treatments in the German health-care system, the patient can receive during the trial, (ii)  
53 the support to access those treatments, and an (iii) active contingent, explained in the rest  
54 of this paragraph. Patients in the control group have access to selected sets of offered  
55 web-based information. These information sets will be based on CBT and contain written  
56 information about skills like reframing, activating resources, relaxation, distraction, or  
57 stress management. Every other week, a new set of non-interactive written information  
58  
59  
60

1  
2  
3 will briefly inform patients about the benefits of these skills during the course of the disease  
4 and motivate them to use these skills. No exercises, interactive worksheets, videos, audio  
5 material, and mindfulness exercises are given in the control condition, apart from the short  
6 psychoeducational information.  
7  
8

9  
10 We do not expect serious or adverse events (see *Ethical aspects*). In case of unexpected  
11 serious adverse event (e.g., risk for suicide, severe depressive symptomatology) all  
12 participants can consult an expert of the study team at their centre to receive appropriate  
13 support.  
14

15  
16 The experimental intervention and control intervention is considered complete when at  
17 least five of eight mandatory modules have been completed. To ensure intervention  
18 adherence and fidelity, all participants will receive notifications which inform them when a  
19 new module is available. In addition, push notifications can be activated to receive  
20 reminders in order to enhance motivation. To improve adherence, patients who have been  
21 inactive for at least two weeks will receive additional personalized notifications. All  
22 notifications and reminders are standardized.  
23  
24  
25  
26  
27

### 28 29 *Outcomes*

30 The primary outcome is distress at the end of the treatment (T1; see Table 1). To measure  
31 distress, we will use the total score of the Hospital Anxiety and Depression Scale  
32 (HADS).[27] The HADS was developed to assess possible distress in somatically-ill  
33 patients. It is a valid and objective self-rating patient-reported outcome measure and is a  
34 common instrument in psycho-oncological trials. It consists of two subscales, assessing  
35 symptoms of anxiety and depression, with each subscale comprising seven 4-point scale  
36 items. A validated German version is available, and is implemented in routine psycho-  
37 oncological care as well as in psycho-oncological research.[28]

38 Large RCTs investigating the efficacy and effectiveness of psycho-oncological treatments  
39 have used distress as a primary or secondary outcome.[9, 10, 21, 29] Treatment guidelines  
40 for psycho-oncological treatment emphasize the importance of targeting and reducing  
41 distress in cancer patients (e.g., [30]).  
42

43 Secondary endpoints for this study include (a) self-efficacy, (b) quality of life, (c)  
44 mindfulness, (d) distress over four assessment points, (e) distress and its longitudinal  
45 course, (f) depression and anxiety symptoms, (g) client satisfaction, (h) time to dropout,  
46 (i) cost-effectiveness, (j) predictors of usage, and (k) coping skills. These outcomes have  
47 been chosen based on recommendations by current treatment guidelines (German Clinical  
48 Practice Guideline) or on their establishment in previous psycho-oncological and e-mental  
49 health trials.[9, 10, 29, 31] We will use validated instruments, self-generated items as well  
50 as usage data.  
51  
52  
53  
54  
55  
56  
57  
58  
59  
60

1  
2  
3 (a) Self-efficacy: For the assessment of self-efficacy, we will use the German version of  
4 the General Self-Efficacy Scale (GSES).[32] The GSES is a self-report measure of self-  
5 efficacy and optimistic self-beliefs related to coping with a variety of difficult demands in  
6 life as well as coping with all kinds of stressful life events. Responses are rated on a 4-  
7 point Likert scale for all ten items. It is available in 33 languages, and it is objective and  
8 validated in the German language.

9  
10  
11 (b) Quality of life: We will apply two questionnaires to measure quality of life in the  
12 proposed trial. First, the widely used European Quality of Life 5 Dimensions 5 Level  
13 questionnaire (EQ-5D-5L) [33] will be used as a generic quality of life questionnaire and  
14 as the basis for cost-effectiveness analyses (see below). The EQ-5D-5L consists of five  
15 health-related dimensions, which can be scored on five levels. Additionally, the  
16 questionnaire includes one visual analogue scale to assess general health status. We will  
17 also use the European Organization for Research and Treatment of Cancer - Quality of Life  
18 Questionnaire (EORTC-QLQ-C30),[34] which was developed to assess the quality of life of  
19 cancer patients. It is composed of 30 items and incorporates nine multi-item scales: five  
20 functional scales (physical, role, cognitive, emotional, and social); three symptom scales  
21 (fatigue, pain, and nausea, and vomiting); and one global health and quality of life scale.  
22 Several single-item symptom measures are also included. Responses are given on a 4-  
23 point Likert scale except for the items that evaluate overall quality of life (items 29 and  
24 30), which are given on a 7-point Likert scale. We will use the validated and reliable  
25 German version.

26  
27 (c) Mindfulness: To assess mindfulness, we will use the validated German version of the  
28 Freiburg Mindfulness Inventory (FMI).[35] It consists of 14 items, and all responses are  
29 given on a 4-point Likert scale.

30  
31 (d) Distress over four assessment points: Distress assessed with the HADS will be modelled  
32 over the whole treatment period of each patient, with measurements taken at T0 (baseline  
33 assessment), T1 (post-treatment assessment), T2 (3 months follow-up assessment), and  
34 T3 (6 months follow-up assessment (see also Table 1). This will provide insights into  
35 changes of distress depending on various starting points of distress.

36  
37 (e) Distress: Distress and its longitudinal course measured via the Distress Thermometer  
38 (DT) [36] will be analysed over the whole trial of each patient, with measurements taken  
39 at T0 (baseline assessment), T1 (post-treatment assessment), T2 (3 months follow-up  
40 assessment), and T3 (6 months follow-up assessment). Furthermore, the DT will be applied  
41 twice in each module of the experimental and control intervention. DT is an efficient and  
42 convenient validated measurement of assessing distress. It is an established and rapid  
43 screening instrument for distress, which is presented as a visual thermometer using a scale  
44 from 0 (no distress) to 10 (extreme distress).

45  
46 (f) Depression and anxiety symptoms: We will use the Patient Health Questionnaire-4 (PHQ-  
47 4) [37] in its validated German version to measure depression and anxiety symptoms. The  
48  
49  
50  
51  
52  
53  
54  
55  
56  
57  
58  
59  
60



PHQ-4 is an established short questionnaire, which consists of four items: two items on depression (PHQ-2) and two items on generalized anxiety (Generalized Anxiety Disorder Scale-2, GAD-2). Answers are rated on a 4-point Likert scale for all four items. The PHQ-4 will be applied over the whole trial of each patient with measurements taken at T0, T1, T2, and T3 (see also Table 1). During the experimental intervention it will be applied in each module in order to track changes in the level of depression and anxiety during the course of the intervention. The PHQ-4 will be used during the control intervention as well.

(g) Client satisfaction and usability: The Client Satisfaction Questionnaire adapted to Internet-based interventions [CSQ-I] [38] is an adapted German version of an eight-item client satisfaction questionnaire [ZUF-8] [39] used to assess the global satisfaction of participants with the internet-based intervention. Responses are given on a 4-point Likert scale for all items. Additionally, the German version of the System Usability Scale [SUS] [40] is used to assess the usability of the Make It Training. This questionnaire comprises 10 items, which are to be rated on a 5-point Likert scale. Furthermore, self-generated items to evaluate specific aspects (e.g., content, videos) will be used. On top of that, we will use a healthcare smartphone app evaluation survey to determine if our tool is reliable and useful.[41]

(h) Time to dropout and usage behaviour will be defined based on the number and type of modules completed, time per day, type and number of modules started, time since last log in, frequency of log in, frequency of each module, time for each module, % of each module completed, type and number of videos and audios started, and type and number of videos and audios finished. Patients who do not login for six weeks are considered as dropouts.

(i) Cost-effectiveness: The aim of the economic evaluation is to analyse the cost-effectiveness of the Make It Training by performing a cost-effectiveness- and a cost-utility-analysis from a payers' perspective. For the cost-utility analysis, quality-adjusted life years (QALYs) calculated based on utilities derived from the EQ-5D-5L questionnaire will be used as an effect measure. Resource use will be ascertained by questionnaire and will be evaluated in monetary units according to standards of health economics.

(j) Predictors of usage: It is very important to assess predictors of actual usage behaviour because interventions can only be beneficial to those patients using the intervention. Therefore, the predictors of actual usage behaviour/ uptake of the Make It Training will be evaluated. To this end a modified version of the model based on the Unified Theory of Acceptance and Use of Technology (UTAUT) will be established.[42] Furthermore, internet related variables will be established.

(k) Coping skills: Self-generated items to assess changes in coping skills will be used.

**Table 1: Overview of the assessment schedule**

|  | Planned assessment time points |  |
|--|--------------------------------|--|
|  |                                |  |



| Measures                                                                 | Baseline<br>(T0 -<br>month 0) | During<br>treatment | End of<br>treatment<br>(T1 –<br>month 4) | 3-month<br>Follow-up<br>(T2 –<br>month 7) | 6-month<br>Follow-up<br>(T3 –<br>month 10) | Drop-<br>out |
|--------------------------------------------------------------------------|-------------------------------|---------------------|------------------------------------------|-------------------------------------------|--------------------------------------------|--------------|
| <b><u>Primary outcome</u></b>                                            |                               |                     |                                          |                                           |                                            |              |
| <b>Distress</b>                                                          |                               |                     |                                          |                                           |                                            |              |
| HADS                                                                     | x                             |                     | x                                        | x                                         | x                                          | x            |
| <b><u>Secondary outcomes</u></b>                                         |                               |                     |                                          |                                           |                                            |              |
| <b>Self-efficacy</b>                                                     |                               |                     |                                          |                                           |                                            |              |
| GSES                                                                     | x                             |                     | x                                        | x                                         | x                                          | x            |
| <b>Quality of Life</b>                                                   |                               |                     |                                          |                                           |                                            |              |
| EORTC-QLQ-C30                                                            |                               |                     | x                                        | x                                         | x                                          | x            |
| EQ-5D-5L                                                                 | x                             |                     |                                          |                                           |                                            |              |
| <b>Mindfulness</b>                                                       |                               |                     |                                          |                                           |                                            |              |
| FMI                                                                      | x                             |                     | x                                        | x                                         | x                                          | x            |
| <b>Distress</b>                                                          |                               |                     |                                          |                                           |                                            |              |
| DT                                                                       |                               |                     |                                          |                                           |                                            | x            |
| HADS                                                                     | x                             | x                   | x                                        | x                                         | x                                          |              |
| <b>Depression &amp; Anxiety</b>                                          |                               |                     |                                          |                                           |                                            |              |
| PHQ-4                                                                    | x                             | x                   | x                                        | x                                         | x                                          | x            |
| <b>Internet related variables</b>                                        | x                             |                     |                                          |                                           |                                            |              |
| <b>Resource use</b>                                                      | x                             |                     |                                          | x                                         | x                                          |              |
| <b>Client satisfaction,<br/>usability, and predictors of<br/>usage</b>   |                               |                     |                                          |                                           |                                            |              |
| CSQ-I                                                                    |                               |                     | x                                        |                                           |                                            | x            |
| SUS                                                                      |                               |                     | x                                        |                                           |                                            | x            |
| UTAUT                                                                    | x                             |                     |                                          |                                           |                                            |              |
| ETHSA                                                                    |                               |                     | x                                        |                                           |                                            | x            |
| <b><u>Usage behaviour</u></b> <sup>1</sup>                               |                               | x                   |                                          |                                           |                                            |              |
| <b><u>Self-generated items</u></b> <sup>2</sup>                          | x                             | x                   | x                                        | x                                         | x                                          | x            |
| <b><u>Demographic &amp; medical<br/>characteristics</u></b> <sup>3</sup> | x                             |                     |                                          |                                           |                                            |              |

Note: HADS = Hospital Anxiety and Depression Scale; GSES = General Self-Efficacy; EORTC-QLQ-C30 = European Organization for Research and Treatment of Cancer Quality of Life Questionnaire; EQ-5D-5L = European Quality of Life 5 Dimensions 5 Level Version; FMI = Freiburg Mindfulness Inventory; DT = Distress Thermometer; PHQ-4 = Patient Health Questionnaire-4; CSQ-I = Client Satisfaction Questionnaire adapted to Internet-based interventions; SUS = System Usability Scale; UTAUT = Unified theory of acceptance and use of technology model; ETHSA = Evaluation Tool for Healthcare Smartphone Applications.

<sup>1</sup> Usage behaviour refers to both groups. For the experimental group, it implies: Time per day, type and number of modules started, type and number of modules finished, time since last log in, frequency of log in, frequency of each module, time for each module, % of each module completed, type and number of videos and audios started, and type and number of videos and audios finished. For the control group, it implies: Time per day, type and number of "modules" displayed, time since last log in, frequency of log in, frequency of each "module", time for each "module", whereby a "module" is defined as brief written psychoeducational information.

<sup>2</sup> Self-generated items on acceptability, satisfaction with the Make It Training, mindfulness, self-efficacy, coping, and skills as well as eHealth related variables (e.g., internet experience).

<sup>3</sup> Changes in the medical conditions and social demographic parameters of the patients will be continually assessed

### *Trial procedure and timeline*

An overview of the trial flow and assessment schedule is presented in Figure 1 and Table 1, respectively. Trial duration for participants comprises 10 months (including 4 months of intervention). Once the interested patient contacts the study staff, a screening for eligibility will be applied and the patient will receive an explanation about the study conditions, data storage and data safety (oral and written). The patient will receive an appointment for the baseline diagnostic assessment to check for eligibility, which will take place in persona at the respective clinic. The patient will be included into the study, if inclusion criteria are met and exclusion criteria do not apply and the patient has given written informed consent. Once the patient is included into the study and the baseline assessment is completed, allocation into one of the following study groups will be applied via randomization: Make It Training (experimental group) or TAU-O (control group). The patients will be informed about their group allocation result and will receive an e-mail with the online link for the offered web-based program and a code to log in into this program and to be able to access the respective intervention (Make It Training or TAU-O).

After four months of experimental or control intervention a post-treatment diagnostic assessment and two follow-up diagnostic assessments will be implemented via a web-based survey 0, 3 and 6 months after the ending of the intervention. Patients receive reminder notifications (stepped intensity: E-mail, phone call) in case of non-completion of the assessments. In case of a dropout (no login for six weeks) during the intervention, those patients receive an E-Mail with an online link for a short questionnaire assessing reasons for their dropout.

### *Sample size calculation*

The sample size planning is based on the publication of van den Berg et al., 2015.[10] In this publication, a dropout rate of 25% was assumed for the planning of the study, but only a 5% dropout rate was observed at T1 (primary endpoint). In our project, we conservatively assume a dropout rate of 20%, which to us seems to be a realistic assumption for an e-mental health intervention. Furthermore, we assume an equal dropout

1  
2  
3 rate in both arms of the study and zero difference (after imputation, statistical analysis)  
4 between dropouts in both arms in terms of the primary endpoint. In the end, assuming an  
5 effect size of  $d$  for compliant patients, the true effect size expected in our study would be  
6  $0.80*d$ . Drawing on the paper of van den Berg et al., 2015 we expect an effect size of 0.37  
7 for a baseline adjusted analysis, drop outs excluded (the effect size of the unadjusted  
8 analysis was recalculated from Table 2 of van den Berg et al., 2015 [10] 0.36, so there  
9 was no relevant difference between adjusted and unadjusted analysis). Due to a small  
10 effect to be expected by the active control condition, we conservatively assume an effect  
11 size of 0.30 in our study. In summary, we assume an effect size of  $0.80*0.30=0.24$ .  
12 Accordingly, a sample size of 274 patients per group would be necessary. Note that  
13 dropouts are already included in this sample due to the effect shrinkage used in sample  
14 size calculation. To adjust for centre effects and baseline ( $df=6+1$ ) we need a total of 556  
15 recruited patients ( $n=278$  per study arm). Therefore, the goal of the study is to allocate  
16 600 patients and include 556 into the ITT analysis.  
17  
18  
19  
20  
21  
22  
23  
24  
25

#### 26 *Randomization and blinding*

27 Randomization will be applied via @secuTrial (www.secutrial.com) using a standard  
28 computer algorithm. @secuTrial will be provided by the Institute of Clinical Epidemiology  
29 and Applied Biostatistics (IKEaB), Medical Faculty Tübingen, Eberhard Karls University  
30 Tübingen. Stratification for study centres will be applied. The remaining prognostic factors  
31 are assumed to be balanced as a result of the randomization process. The randomization  
32 of participants and data monitoring will be ensured by the participating study centres.  
33 Blinding for both patients and therapists will be impossible in the trial, although assessors  
34 and statisticians (primary analysis) will be blinded to group allocation in order to ensure  
35 objective analyses and audits.  
36  
37  
38  
39  
40  
41

#### 42 *Data management, data storage, and dissemination policy*

43 To protect confidentiality, the participant's data will be pseudonymized and stored for at  
44 least ten years. Independent data management is ensured by the IKEaB. In line with the  
45 EU General Data Protection Regulations, we will use the established and structured  
46 procedures implemented at Tübingen University Hospitals (databases: @secuTrial). After  
47 the data-management plan (including digital data storing, archiving and regular plausibility  
48 checks) of the IKEaB, all standard operating procedures (SOPs) will be compliant with legal  
49 requirements. The data are entered electronically either by the study team or by the  
50 patients themselves. Paper-based source data will be entered to the electronic database.  
51 The conformity with the source data is monitored.  
52  
53  
54  
55  
56

57 As per the guidelines of Good Clinical Practice (§13), all important trial data (including  
58 signed informed consents, patient identification lists, and original records of clinical  
59 findings) will be archived for 10 years after completion or termination of the trial. Patient  
60

1  
2  
3 documents will be stored in accordance with the time permitted by the hospitals (at least  
4 10 years). Data in terms of usage behaviour will be stored anonymously on a server, placed  
5 in the Clinic for Psychosomatic Medicine and Psychotherapy, LVR Hospital Essen. As per  
6 the guidelines of Good Clinical Practice (§13), usage behaviour data will be stored 10 years  
7 after completion or termination of the trial. Only authorized staff (project team) have  
8 access to the ICH/GCP-compliant validated system (@secuTrial).

9  
10  
11  
12 Data storage and sharing will be in accordance with Good Clinical Practice guidelines,  
13 Deutsche Forschungsgemeinschaft (DFG) guidelines, and the statements concerning data  
14 sharing in The New England Journal of Medicine.[43, 44] Data collected from the trial will  
15 be anonymously available in data repositories after the major results are published. The  
16 statistical analysis plan and all relevant documents will be stored and made available by  
17 request. Access to data storage will be restricted to authorized personnel. Patient consent  
18 forms will contain a section concerning the aforementioned aspects of data storage and  
19 data sharing.

20  
21  
22  
23  
24 We will set up a project homepage that will update the interested public on the progression  
25 of the trial, participation opportunities (e.g., workshops, conferences), and major results.  
26 The website will remain live beyond the core funding period, acting as a central access  
27 point for future research work and outputs and as an avenue to a longer dissemination  
28 legacy. The main results of the trial will be submitted for publication in an open-access  
29 peer-reviewed journal and will be made publicly available in the clinical trial registry. In  
30 addition to presenting the results at national and international conferences, we will  
31 regularly communicate scientific results in lay language via press releases, social media,  
32 and forums that are popular among patients. We will especially collaborate with our patient  
33 council and patient organizations in planning and implementing targeted and patient-  
34 oriented information campaigns in order to explain and disseminate the results to cancer-  
35 affected persons and the public. For further dissemination and in-depth discussion of the  
36 results, we will involve the Comprehensive Cancer Center (CCC) network in Germany, and  
37 we will specifically rely on their expertise in promoting public awareness for psycho-  
38 oncological research.

### 48 *Monitoring*

49  
50 Monitoring will be provided by the Centre of Clinical Trials (ZKS), an independent clinical  
51 research unit of the University Hospital Tübingen, which is independent of clinics  
52 performing the study. The ZKS is responsible for the methodological quality of the proposed  
53 trial. The ZKS has set the highest-quality criteria according to the legal requirements for  
54 medicines and medical devices as well as according to the Good Clinical Practice guidelines.  
55 The ZKS quality management system is certified under DIN EN ISO 9001:2015. All  
56 activities connected with the proposed trial will be conducted in accordance with the SOPs  
57 of the ZKS. The monitoring plan includes a pre-trial visit, intermediate monitoring and a  
58  
59  
60

1  
2  
3 close-out visit in each recruiting centre. The data-monitoring plan includes the validation  
4 of written informed consent forms, documentation of (severe) adverse events, data validity  
5 of outcome measures with particular focus on source data transfer, validation of inclusion  
6 and exclusion criteria, and documentation of the ending of treatment and dropouts.  
7  
8  
9

### 10 *Statistical methods*

11  
12 The primary aim of this trial is to demonstrate the superiority of the e-mental health  
13 intervention Make It Training in comparison to TAU-O in terms of distress in cancer  
14 patients. The primary endpoint, distress, will be analysed using a baseline (T0, face-to-  
15 face assessment) -adjusted ANCOVA for distress measurement once the intervention (T1)  
16 has been completed, with study arm as binary factor, baseline as continuous measurement,  
17 and study centre as an additional categorical covariate. The primary analysis will be in the  
18 intention-to-treat population, with imputation of missing data in the case of dropouts.  
19 Intention to treat will be defined as all patients for whom the HADS scale is available at  
20 baseline. Additionally, it is expected that patient age and gender will be documented, and  
21 these variables will be used to impute missing values. Imputation will be computed using  
22 the SPSS module for multiple imputations with "monotone missing pattern" (as we will use  
23 complete data for gender, age, and baseline). The number of imputations will be 3000,  
24 and the seed will be set to the date of analysis (ddmmyy). Furthermore, it is expected that  
25 endpoint measurements might be obtained from at least a subsample of dropouts, which  
26 might improve the accuracy of imputation procedures. An interim analysis is not planned.  
27 Secondary analyses include mixed models for overall change in distress; self-efficacy;  
28 mindfulness; coping; depression and anxiety; and quality of life including physical  
29 condition, tumour entity, and treatment method; the analyses will use T0 as covariate and  
30 T1, T2, and T3 as dependent observations with a predefined analysis: interaction of group  
31 with contrasts estimation of adjusted mean and 95% CI. Furthermore, secondary endpoints  
32 will be analysed using a chi-square test and logistic regression for binary outcomes, t-  
33 tests, and linear models for continuous outcomes. Time to dropout will be analysed as a  
34 secondary endpoint itself, using the Kaplan-Meier estimate and the Cox proportional hazard  
35 regression. Separate tabulations and line listings of adverse events and severe adverse  
36 events will be ensured to analyse safety. Ratio of changes in resource use and of changes  
37 in primary endpoint and in quality of life will generate point estimates for the incremental  
38 cost-effectiveness ratio; to determine deterministic and probabilistic sensitivity a  
39 respective analysis will be performed.  
40  
41  
42  
43  
44  
45  
46  
47  
48  
49  
50  
51  
52  
53  
54  
55

### 56 *Ethical aspects*

57 From our view, the trial poses no ethical concerns. We are unaware of specific risks or  
58 disadvantages that might affect patients during the trial, and we expect no specific adverse  
59 or serious adverse events. In case of unexpected adverse or serious adverse events they  
60

1  
2  
3 will be documented and reported by the responsible monitoring unit. During the trial,  
4 patients will have access to telephone/video consultation or face-to-face contact with a  
5 member of the study team (psychologist or physician) if indicated as needed.  
6

7 We evaluated the risk of the proposed trial based on published literature in similar trials  
8 conducted before.[9, 10, 45, 46]. Make It Training as well as TAU-O involves the chance  
9 of improvement of distress in cancer patients. Side effects of evidence-based  
10 psychotherapies are fortunately rather rare. Possible undesired effects may include  
11 transient worsening of symptoms.  
12

13 The Ethics Committee of the University Hospitals Essen have approved the study (21-  
14 10076-BO). Written informed consent is mandatory for all patients to participate and will  
15 be obtained after providing oral and written information and prior to randomization. All  
16 participating patients can withdraw at any time without any disadvantage. The trial will be  
17 conducted in accordance with the tenets of the Declaration of Helsinki and the guidelines  
18 of Good Clinical Practice. Recruitment in the study centres will not begin until the study  
19 protocol has been approved and the relevant ethics committee has given its approval. A  
20 Data Safety and Monitoring Board (DSMB) has been implemented. The DSMB will supervise  
21 and monitor the proposed trial and is obliged to take appropriate actions where needed.  
22 The DSMB evaluates conformity of the trial with the study protocol as well as compliance  
23 with ethical criteria. The DSMB will decide whether practice is meeting the ethical criteria  
24 determined for this trial and/or whether the trial should be stopped. Adverse events and  
25 dropouts throughout the trial will be assessed and documented by the study team. The  
26 study team will be required to inform the DSMB if any adverse events or dropouts occur.  
27 Major events that need to be monitored include acute suicidality, suicidal acts, and clinically  
28 relevant increased symptomatology. Checks for causes of adverse events will be applied  
29 at each participating study centre.  
30  
31  
32  
33  
34  
35  
36  
37  
38  
39  
40

#### 41 42 *Patient and public involvement*

43 Patients were involved in developing the Make It Training (the content of the modules,  
44 recommendations for enhancing usability) and in planning the proposed trial. We have  
45 established a patient council and involved the self-help organization Haus der Krebs-  
46 Selbsthilfe - Bundesverband e.V. to support the project team. Haus der Krebs-Selbsthilfe  
47 - Bundesverband e.V. is an established umbrella organization of many different cancer self-  
48 help organizations in Germany and is primarily funded by the non-profit organization  
49 German Cancer Aid Foundation. The patient council will be consulted regarding research  
50 design, patient-friendly summaries, and consent forms, as well as regarding dissemination  
51 of results among patients and in academic publications. The final case report forms were  
52 tested regarding comprehensibility, illustration, and duration of processing by the members  
53 of the patient council. During regular exchanges with the patient council, we will also  
54 mobilize different social media and self-help cancer groups to disseminate the trial's  
55  
56  
57  
58  
59  
60



1  
2  
3 results. The public in the form of the Federal Ministry of Education and Research is the  
4 sponsor of this trial.  
5  
6

## 7 **Discussion**

8  
9 In our prospective, multicentre, randomized controlled confirmatory intervention trial  
10 (Reduct), we aim to assess the efficacy and cost-effectiveness of the e-mental health  
11 intervention Make It Training. The aim is to offer an evidence-based, efficient, cost-  
12 effective web-based psycho-oncological intervention in routine-care for individuals with  
13 cancer to reduce distress and enhance well-being.  
14  
15

16 The provision of care via e-mental health approaches aims to keep costs low for treating  
17 staff and premises, to offer care to many people at the same time, to promote continuity  
18 of care by being independent of time and place and to overcome the insufficient availability  
19 of specialized treatments by improving outreach. Thus, the training has socio- and health-  
20 economic benefits. By evaluating the efficacy of the Make It Training, important findings  
21 for e-mental health interventions in general and in the context of somatic diseases could  
22 be derived. Accordingly, other patient groups could benefit from this approach as well.  
23  
24

25 Treatment guidelines for psycho-oncology emphasize the importance of targeting and  
26 reducing distress in cancer patients.[30] The initial results of e-mental health interventions  
27 have been promising for cancer patients.[9, 10, 47] Accordingly, RCTs are needed to  
28 evaluate e-mental health interventions in psycho-oncological care – especially self-guided  
29 interventions, with low cost-intensity and with outreach to outlying regions with limited  
30 psycho-oncological offers.[10, 47-49] Given the increasing impact of digital technologies  
31 in daily life, the web-based Make It Training has the potential to reach high numbers of  
32 patients and to overcome barriers that patients face in analogue face-to-face care (e.g.,  
33 physical and psychological constraints due to cancer symptoms or treatments, limited  
34 psycho-oncological resources) [50]. Because it is accessible everywhere at any time, the  
35 Make It Training enables cancer patients to participate in psycho-oncological interventions  
36 regardless of barriers in the current health care system.[51] Younger cancer patients  
37 generally report more unmet needs and utilize less likely psycho-oncological services;[52]  
38 the e-mental health intervention meets their demands and requirements.  
39  
40

41 In conclusion, we expect the results to contribute to the knowledge on e-mental health  
42 interventions in general and especially for cancer patients and to overcome barriers or  
43 obstacles in everyday healthcare in order to offer significant benefits for both patient and  
44 provider.  
45  
46

## 47 **List of Abbreviations**

48 CBT = cognitive behavioural therapy

49 MBSR = mindfulness-based stress reduction

50 TAU-O = treatment as usual optimized  
51  
52  
53  
54  
55

1  
2  
3 RCT(s) = randomized controlled trial(s)

4 SOPs = standard operating procedures

5  
6 IKEaB = Institute of Clinical Epidemiology and Applied Biostatistics

7  
8 ZKS = Centre of Clinical Trials

9  
10 **Authors' contributions:** Funding for this trial was obtained by MT (PI), AB (trial  
11 coordinator), JG (Co-PI), and YE (Co-PI). PM provided statistical and methodical expertise  
12 in trial design and is the principal trial statistician. PM is responsible for data management  
13 during the trial. CS, JH, MD, AD, AM-T, DS, JS, MT, JW, AW, and SZ are trial site  
14 investigators who contributed to refinement of the study design and protocol,  
15 implementation of the trial and who are involved regarding patient recruitment, treatment,  
16 and data collection. JG, AB, CS, and JH developed and further adapted the intervention  
17 and prepared the content for eHealth adaption. SD is responsible for the intervention's IT  
18 infrastructure and provided important feedback on eHealth-related issues. SZ is senior  
19 consultant within in the trial. AN provided health economic expertise in the trial design and  
20 is responsible for the health economic evaluations. WB is head of the Centre of Clinical  
21 Trials (ZKS), which is responsible for quality assurance, monitoring, and adherence to the  
22 study protocol. All authors contributed to refinement of the study protocol. AB drafted the  
23 manuscript and all co-authors critically reviewed it and approved the final version of the  
24 manuscript.

25  
26  
27  
28  
29  
30  
31  
32  
33  
34  
35 **Funding statement:** This research received financial sponsoring from the Federal Ministry  
36 of Education and Research (01KG2021). The funding source has no role in the design of  
37 this study and will not have any role during its execution, analyses, interpretation of the  
38 data, or decision to submit results.

39  
40  
41  
42 **Competing interest statement:** The authors declare that they have no financial or  
43 competing interest.

## 44 45 46 47 **References**

- 48 1. Sung H, Ferlay J, Siegel RL, et al. Global Cancer Statistics 2020: GLOBOCAN  
49 Estimates of Incidence and Mortality Worldwide for 36 Cancers in 185 Countries. *CA*  
50 *Cancer J Clin.* 2021;71(3):209-49.
- 51 2. Murray CJL, Vos T, Lozano R, et al. Disability-adjusted life years (DALYs) for 291  
52 diseases and injuries in 21 regions, 1990–2010: a systematic analysis for the Global  
53 Burden of Disease Study 2010. *The Lancet.* 2012;380(9859):2197-223.
- 54 3. Mehnert A, Hartung TJ, Friedrich M, et al. One in two cancer patients is  
55 significantly distressed: Prevalence and indicators of distress. *Psychooncology.*  
56 2018;27(1):75-82.
- 57 4. Mehnert A, Brahler E, Faller H, et al. Four-week prevalence of mental disorders in  
58 patients with cancer across major tumor entities. *J Clin Oncol.* 2014;32(31):3540-6.
- 59 5. Singer S, Das-Munshi J, Brahler E. Prevalence of mental health conditions in  
60 cancer patients in acute care--a meta-analysis. *Ann Oncol.* 2010;21(5):925-30.



6. Buttner M, Konig HH, Lobner M, et al. Out-of-pocket-payments and the financial burden of 502 cancer patients of working age in Germany: results from a longitudinal study. *Support Care Cancer*. 2019;27(6):2221-8.
7. Zaorsky NG, Zhang Y, Tuanquin L, et al. Suicide among cancer patients. *Nat Commun*. 2019;10(1):207.
8. Park CL, Gaffey AE. Relationships between psychosocial factors and health behavior change in cancer survivors: an integrative review. *Ann Behav Med*. 2007;34(2):115-34.
9. Urech C, Grossert A, Alder J, et al. Web-Based Stress Management for Newly Diagnosed Patients With Cancer (STREAM): A Randomized, Wait-List Controlled Intervention Study. *J Clin Oncol*. 2018;36(8):780-8.
10. van den Berg SW, Gielissen MF, Custers JA, et al. BREATH: Web-Based Self-Management for Psychological Adjustment After Primary Breast Cancer--Results of a Multicenter Randomized Controlled Trial. *J Clin Oncol*. 2015;33(25):2763-71.
11. Smith SK, MacDermott K, Amarasekara S, et al. Reimagine: a randomized controlled trial of an online, symptom self-management curriculum among breast cancer survivors. *Support Care Cancer*. 2019;27(5):1775-81.
12. Chambers SK, Ritterband LM, Thorndike F, et al. Web-Delivered Cognitive Behavioral Therapy for Distressed Cancer Patients: Randomized Controlled Trial. *J Med Internet Res*. 2018;20(1):e42.
13. Cheung EO, Cohn MA, Dunn LB, et al. A randomized pilot trial of a positive affect skill intervention (lessons in linking affect and coping) for women with metastatic breast cancer. *Psychooncology*. 2017;26(12):2101-8.
14. Beatty L, Koczwara B, Wade T. Evaluating the efficacy of a self-guided Web-based CBT intervention for reducing cancer-distress: a randomised controlled trial. *Support Care Cancer*. 2016;24(3):1043-51.
15. Dowd H, Hogan MJ, McGuire BE, et al. Comparison of an Online Mindfulness-based Cognitive Therapy Intervention With Online Pain Management Psychoeducation: A Randomized Controlled Study. *Clin J Pain*. 2015;31(6):517-27.
16. Wootten AC, Abbott JA, Meyer D, et al. Preliminary results of a randomised controlled trial of an online psychological intervention to reduce distress in men treated for localised prostate cancer. *Eur Urol*. 2015;68(3):471-9.
17. Cillessen L, Schellekens MPJ, Van de Ven MOM, et al. Consolidation and prediction of long-term treatment effect of group and online mindfulness-based cognitive therapy for distressed cancer patients. *Acta Oncol*. 2018;57(10):1293-302.
18. Ham K, Chin S, Suh YJ, et al. Preliminary Results From a Randomized Controlled Study for an App-Based Cognitive Behavioral Therapy Program for Depression and Anxiety in Cancer Patients. *Front Psychol*. 2019;10:1592.
19. Russell L, Ugalde A, Orellana L, et al. A pilot randomised controlled trial of an online mindfulness-based program for people diagnosed with melanoma. *Support Care Cancer*. 2019;27(7):2735-46.
20. Jim HSL, Hyland KA, Nelson AM, et al. Internet-assisted cognitive behavioral intervention for targeted therapy-related fatigue in chronic myeloid leukemia: Results from a pilot randomized trial. *Cancer*. 2020;126(1):174-80.
21. Nissen ER, O'Connor M, Kaldo V, et al. Internet-delivered mindfulness-based cognitive therapy for anxiety and depression in cancer survivors: A randomized controlled trial. *Psychooncology*. 2020;29(1):68-75.
22. Triberti S, Savioni L, Sebri V, et al. eHealth for improving quality of life in breast cancer patients: A systematic review. *Cancer Treat Rev*. 2019;74:1-14.
23. McCann L, McMillan KA, Pugh G. Digital Interventions to Support Adolescents and Young Adults With Cancer: Systematic Review. *JMIR Cancer*. 2019;5(2):e12071.
24. Chan AW, Tetzlaff JM, Altman DG, et al. SPIRIT 2013 statement: defining standard protocol items for clinical trials. *Ann Intern Med*. 2013;158(3):200-7.
25. Sharpe M, Walker J, Hansen CH, et al. Integrated collaborative care for comorbid major depression in patients with cancer (SMaRT Oncology-2): a multicentre randomised controlled effectiveness trial. *The Lancet*. 2014;384(9948):1099-108.
26. Holmes MM. Why People Living With and Beyond Cancer Use the Internet. *Integr Cancer Ther*. 2019;18:1534735419829830.

- 1
- 2
- 3 27. Zigmond AS, Snaith RP. The hospital anxiety and depression scale. *Acta Psychiatr Scand.* 1983;67(6):361-70.
- 4
- 5 28. Petermann F. Hospital Anxiety and Depression Scale, Deutsche Version (HADS-D). *Zeitschrift für Psychiatrie, Psychologie und Psychotherapie.* 2011;59(3):251-3.
- 6
- 7 29. Murphy MJ, Newby JM, Butow P, et al. Randomised controlled trial of internet-delivered cognitive behaviour therapy for clinical depression and/or anxiety in cancer survivors (iCanADAPT Early). *Psychooncology.* 2020;29(1):76-85.
- 8
- 9
- 10 30. Leitlinienprogramm Onkologie (Deutsche Krebsgesellschaft DK, AWMF). *Psychoonkologische Diagnostik, Beratung und Behandlung von erwachsenen Krebspatienten 2014 [Langversion 1.1:]*[Available from: <http://leitlinienprogramm-onkologie.de/Leitlinien.7.0.html>]
- 11
- 12
- 13
- 14 31. Brebach R, Sharpe L, Costa DS, et al. Psychological intervention targeting distress for cancer patients: a meta-analytic study investigating uptake and adherence. *Psychooncology.* 2016;25(8):882-90.
- 15
- 16
- 17 32. Schwarzer R JM. Generalized Self-Efficacy scale. Weinman J WS, Johnston M, editor. UK: NFER-NELSON Windsor; 1995.
- 18
- 19 33. Herdman M, Gudex C, Lloyd A, et al. Development and preliminary testing of the new five-level version of EQ-5D (EQ-5D-5L). *Qual Life Res.* 2011;20(10):1727-36.
- 20
- 21 34. Aaronson NK, Ahmedzai S, Bergman B, et al. The European Organization for Research and Treatment of Cancer QLQ-C30: a quality-of-life instrument for use in international clinical trials in oncology. *J Natl Cancer Inst.* 1993;85(5):365-76.
- 22
- 23 35. Walach H, Buchheld N, Buttenmüller V, et al. Measuring mindfulness—the Freiburg Mindfulness Inventory (FMI). *Personality and Individual Differences.* 2006;40(8):1543-55.
- 24
- 25
- 26 36. Mehnert A, Müller D, Lehmann C, et al. Die deutsche Version des NCCN Distress-Thermometers. *Zeitschrift für Psychiatrie, Psychologie und Psychotherapie.* 2006;54(3):213-23.
- 27
- 28
- 29 37. Lowe B, Wahl I, Rose M, et al. A 4-item measure of depression and anxiety: validation and standardization of the Patient Health Questionnaire-4 (PHQ-4) in the general population. *J Affect Disord.* 2010;122(1-2):86-95.
- 30
- 31 38. Boss L, Lehr D, Reis D, et al. Reliability and Validity of Assessing User Satisfaction With Web-Based Health Interventions. *J Med Internet Res.* 2016;18(8):e234.
- 32
- 33 39. Schmidt JN, Rüdiger. ZUF-8. Fragebogen zur Messung der Patientenzufriedenheit. : Hogrefe; 2002.
- 34
- 35 40. J B. SUS: A. 'quickand dirty' usability scale. Jordan PW TB, Weerdmeester BA, McClelland IL, editor. London, Bristol, PA Taylor & Francis; 1996.
- 36
- 37 41. Jin M, Kim J. Development and Evaluation of an Evaluation Tool for Healthcare Smartphone Applications. *Telemed J E Health.* 2015;21(10):831-7.
- 38
- 39 42. Venkatesh, Morris, Davis, et al. User Acceptance of Information Technology: Toward a Unified View. *MIS Quarterly.* 2003;27(3).
- 40
- 41 43. Switula D. Principles of good clinical practice (GCP) in clinical research. *Sci Eng Ethics.* 2000;6(1):71-7.
- 42
- 43 44. Taichman DB, Sahni P, Pinborg A, et al. Data Sharing Statements for Clinical Trials - A Requirement of the International Committee of Medical Journal Editors. *N Engl J Med.* 2017;376(23):2277-9.
- 44
- 45 45. Zainal NZ, Booth S, Huppert FA. The efficacy of mindfulness-based stress reduction on mental health of breast cancer patients: a meta-analysis. *Psychooncology.* 2013;22(7):1457-65.
- 46
- 47 46. Rush SE, Sharma M. Mindfulness-Based Stress Reduction as a Stress Management Intervention for Cancer Care: A Systematic Review. *J Evid Based Complementary Altern Med.* 2017;22(2):348-60.
- 48
- 49 47. Butow P, Smith A. Systematic reviews of pain and online interventions for cancer patients show evidence of mixed efficacy and highlight need for more rigorously designed research. *Patient Educ Couns.* 2015;98(3):267-8.
- 50
- 51 48. Bouma G, Admiraal JM, de Vries EG, et al. Internet-based support programs to alleviate psychosocial and physical symptoms in cancer patients: a literature analysis. *Crit Rev Oncol Hematol.* 2015;95(1):26-37.
- 52
- 53
- 54
- 55
- 56
- 57
- 58
- 59
- 60

- 1  
2  
3 49. Kooistra LC, Wiersma JE, Ruwaard J, et al. Cost and Effectiveness of Blended  
4 Versus Standard Cognitive Behavioral Therapy for Outpatients With Depression in  
5 Routine Specialized Mental Health Care: Pilot Randomized Controlled Trial. *J Med Internet*  
6 *Res.* 2019;21(10):e14261.  
7 50. Leykin Y, Thekdi SM, Shumay DM, et al. Internet interventions for improving  
8 psychological well-being in psycho-oncology: review and recommendations.  
9 *Psychooncology.* 2012;21(9):1016-25.  
10 51. Zebrack BJ, Block R, Hayes-Lattin B, et al. Psychosocial service use and unmet  
11 need among recently diagnosed adolescent and young adult cancer patients. *Cancer.*  
12 2013;119(1):201-14.  
13 52. Dilworth S, Higgins I, Parker V, et al. Patient and health professional's perceived  
14 barriers to the delivery of psychosocial care to adults with cancer: a systematic review.  
15 *Psychooncology.* 2014;23(6):601-12.  
16  
17  
18  
19  
20  
21  
22  
23  
24  
25  
26  
27  
28  
29  
30  
31  
32  
33  
34  
35  
36  
37  
38  
39  
40  
41  
42  
43  
44  
45  
46  
47  
48  
49  
50  
51  
52  
53  
54  
55  
56  
57  
58  
59  
60

For peer review only

1  
2  
3 **Figure legends**  
4  
5

6 **Figure 1.** Trial flow of the REDUCT trial.  
7  
8  
9  
10  
11  
12  
13  
14  
15  
16  
17  
18  
19  
20  
21  
22  
23  
24  
25  
26  
27  
28  
29  
30  
31  
32  
33  
34  
35  
36  
37  
38  
39  
40  
41  
42  
43  
44  
45  
46  
47  
48  
49  
50  
51  
52  
53  
54  
55  
56  
57  
58  
59  
60

For peer review only

1  
2  
3  
4  
5  
6  
7  
8  
9  
10  
11  
12  
13  
14  
15  
16  
17  
18  
19  
20  
21  
22  
23  
24  
25  
26  
27  
28  
29  
30  
31  
32  
33  
34  
35  
36  
37  
38  
39  
40  
41  
42  
43  
44  
45  
46  
47  
48  
49  
50  
51  
52  
53  
54  
55  
56  
57  
58  
59  
60

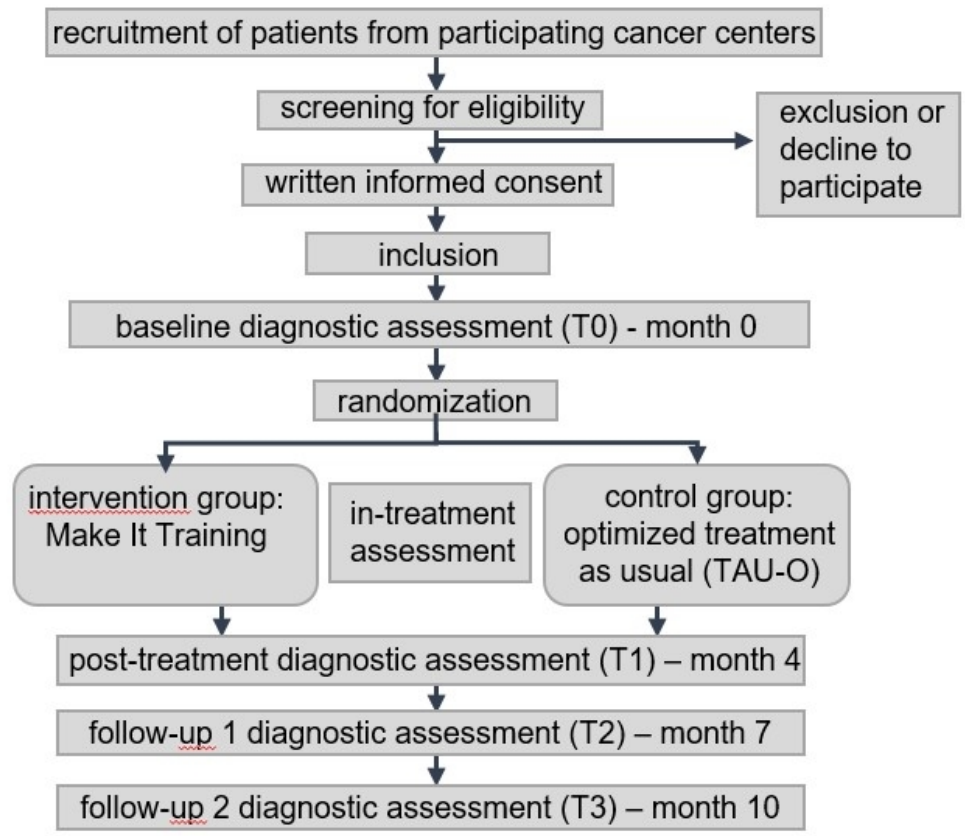

Figure 1. Trial flow of the REDUCT trial.

170x148mm (96 x 96 DPI)

1  
2  
3  
4  
5  
6  
7  
8  
9 **Web-based Mindfulness and Skills Based Distress Reduction for Cancer Patients**  
10 **- Study Protocol of the Multicentre, Randomized, Controlled Confirmatory**  
11 **Intervention Trial Reduct**  
12  
13

14  
15 **by Bäuerle et al., 2021**  
16

17  
18 **Supplementary material I**  
19  
20  
21  
22  
23  
24  
25  
26  
27  
28  
29  
30  
31  
32  
33  
34  
35  
36  
37  
38  
39  
40  
41  
42  
43  
44  
45  
46  
47  
48  
49  
50  
51  
52  
53  
54  
55  
56  
57  
58  
59  
60

For peer review only

**Table 1:** SPIRIT Guidelines

| <i>Selection/item</i>             | <i>Item no</i> | <i>Description</i>                                                                                                                                                                                                                                                                              | <i>Addressed on page no</i> |
|-----------------------------------|----------------|-------------------------------------------------------------------------------------------------------------------------------------------------------------------------------------------------------------------------------------------------------------------------------------------------|-----------------------------|
| <b>Administrative Information</b> |                |                                                                                                                                                                                                                                                                                                 |                             |
| Title                             | 1              | <i>Descriptive title identifying the study design, population, interventions, and, if applicable, trial acronym</i>                                                                                                                                                                             | 1                           |
| Trial registration                | 2a             | <i>Trial identifier and registry name. If not yet registered, name of intended registry</i>                                                                                                                                                                                                     | 3                           |
|                                   | 2b             | <i>All items from the World Health Organization Trial Registration Data Set</i>                                                                                                                                                                                                                 | 1-17                        |
| Protocol version                  | 3              | <i>Date and version identifier</i>                                                                                                                                                                                                                                                              | 4                           |
| Funding                           | 4              | <i>Sources and types of financial, material, and other support</i>                                                                                                                                                                                                                              | 17                          |
| Roles and responsibilities        | 5a             | <i>Names, affiliations, and roles of protocol contributors</i>                                                                                                                                                                                                                                  | 1-2; 17                     |
|                                   | 5b             | <i>Name and contact information for the trial sponsor</i>                                                                                                                                                                                                                                       | 17                          |
|                                   | 5c             | <i>Role of study sponsor and funders, if any, in study design; collection, management, analysis, and interpretation of data; writing of the report; and the decision to submit the report for publication, including whether they will have ultimate authority over any of these activities</i> | 17                          |
|                                   | 5d             | <i>Composition, roles, and responsibilities of the coordinating centre, steering committee, endpoint adjudication committee, data management team, and other individuals or groups overseeing the trial, if applicable (see Item 21a for data monitoring committee)</i>                         | 12-16                       |
| <b>Introduction</b>               |                |                                                                                                                                                                                                                                                                                                 |                             |
| Background and rationale          | 6a             | <i>Description of research question and justification for undertaking the trial, including summary of relevant studies (published and unpublished) examining benefits and harms for each intervention</i>                                                                                       | 2                           |
|                                   | 6b             | <i>Explanation for choice of comparators</i>                                                                                                                                                                                                                                                    | 3                           |

|                                                           |     |                                                                                                                                                                                                                                                                                                |             |
|-----------------------------------------------------------|-----|------------------------------------------------------------------------------------------------------------------------------------------------------------------------------------------------------------------------------------------------------------------------------------------------|-------------|
| Objectives                                                | 7   | Specific objectives or hypotheses                                                                                                                                                                                                                                                              | 3           |
| Trial design                                              | 8   | Description of trial design including type of trial (eg, parallel group, crossover, factorial, single group), allocation ratio, and framework (eg, superiority, equivalence, noninferiority, exploratory)                                                                                      | 3           |
| <b>Methods: Participants, interventions, and outcomes</b> |     |                                                                                                                                                                                                                                                                                                |             |
| Study setting                                             | 9   | Description of study settings (eg, community clinic, academic hospital) and list of countries where data will be collected. Reference to where list of study sites can be obtained                                                                                                             | 5-6         |
| Eligibility criteria                                      | 10  | Inclusion and exclusion criteria for participants. If applicable, eligibility criteria for study centres and individuals who will perform the interventions (eg, surgeons, psychotherapists)                                                                                                   | 5           |
| Interventions                                             | 11a | Interventions for each group with sufficient detail to allow replication, including how and when they will be administered                                                                                                                                                                     | 6-7         |
|                                                           | 11b | Criteria for discontinuing or modifying allocated interventions for a given trial participant (eg, drug dose change in response to harms, participant request, or improving/worsening disease)                                                                                                 | 4; 9; 14-15 |
|                                                           | 11c | Strategies to improve adherence to intervention protocols, and any procedures for monitoring adherence (eg, drug tablet return, laboratory tests)                                                                                                                                              | 6-7; 13-14  |
|                                                           | 11d | Relevant concomitant care and interventions that are permitted or prohibited during the trial                                                                                                                                                                                                  | 5-7         |
| Outcomes                                                  | 12  | Primary, secondary, and other outcomes, including the specific measurement variable (eg, systolic blood pressure), analysis metric (eg, change from baseline, final value, time to event), method of aggregation (eg, median, proportion), and time point for each outcome. Explanation of the | 7-11        |



|                                             |     |                                                                                                                                                                                                                                                                                                                                                                 |          |
|---------------------------------------------|-----|-----------------------------------------------------------------------------------------------------------------------------------------------------------------------------------------------------------------------------------------------------------------------------------------------------------------------------------------------------------------|----------|
|                                             |     | <i>clinical relevance of chosen efficacy and harm outcomes is strongly recommended</i>                                                                                                                                                                                                                                                                          |          |
| <i>Participant timeline</i>                 | 13  | <i>Time schedule of enrolment, interventions (including any run-ins and washouts), assessments, and visits for participants. A schematic diagram is highly recommended (see Figure 1)</i>                                                                                                                                                                       | 5; 10-11 |
| <i>Sample size</i>                          | 14  | <i>Estimated number of participants needed to achieve study objectives and how it was determined, including clinical and statistical assumptions supporting any sample size calculations</i>                                                                                                                                                                    | 11-12    |
| <i>Recruitment</i>                          | 15  | <i>Strategies for achieving adequate participant enrolment to reach target sample size</i>                                                                                                                                                                                                                                                                      | 5-6      |
| <b>Methods: Assignment of interventions</b> |     |                                                                                                                                                                                                                                                                                                                                                                 |          |
| <i>Allocation</i>                           |     |                                                                                                                                                                                                                                                                                                                                                                 |          |
| <i>Sequence generation</i>                  | 16a | <i>Method of generating the allocation sequence (eg, computer-generated random numbers), and list of any factors for stratification. To reduce predictability of a random sequence, details of any planned restriction (eg, blocking) should be provided in a separate document that is unavailable to those who enrol participants or assign interventions</i> | 12       |
| <i>Allocation concealment mechanism</i>     | 16b | <i>Mechanism of implementing the allocation sequence (eg, central telephone; sequentially numbered, opaque, sealed envelopes), describing any steps to conceal the sequence until interventions are assigned</i>                                                                                                                                                | 12       |
| <i>Implementation</i>                       | 16c | <i>Who will generate the allocation sequence, who will enrol participants, and who will assign participants to interventions</i>                                                                                                                                                                                                                                | 12       |
| <i>Blinding (masking)</i>                   | 17a | <i>Who will be blinded after assignment to interventions (eg, trial participants, care providers, outcome assessors, data analysts), and how</i>                                                                                                                                                                                                                | 12       |

|                                                           |     |                                                                                                                                                                                                                                                                                                                                                                                                                     |                |
|-----------------------------------------------------------|-----|---------------------------------------------------------------------------------------------------------------------------------------------------------------------------------------------------------------------------------------------------------------------------------------------------------------------------------------------------------------------------------------------------------------------|----------------|
|                                                           | 17b | <i>If blinded, circumstances under which unblinding is permissible, and procedure for revealing a participant's allocated intervention during the trial</i>                                                                                                                                                                                                                                                         | 12             |
| <b>Methods: Data collection, management, and analysis</b> |     |                                                                                                                                                                                                                                                                                                                                                                                                                     |                |
| <i>Data collection methods</i>                            | 18a | <i>Plans for assessment and collection of outcome, baseline, and other trial data, including any related processes to promote data quality (eg, duplicate measurements, training of assessors) and a description of study instruments (eg, questionnaires, laboratory tests) along with their reliability and validity, if known. Reference to where data collection forms can be found, if not in the protocol</i> | 7-14           |
|                                                           | 18b | <i>Plans to promote participant retention and complete follow-up, including list of any outcome data to be collected for participants who discontinue or deviate from intervention protocols</i>                                                                                                                                                                                                                    | 4-5; 10-11; 14 |
| <i>Data management</i>                                    | 19  | <i>Plans for data entry, coding, security, and storage, including any related processes to promote data quality (eg, double data entry; range checks for data values). Reference to where details of data management procedures can be found, if not in the protocol</i>                                                                                                                                            | 12-13          |
| <i>Statistical methods</i>                                | 20a | <i>Statistical methods for analysing primary and secondary outcomes. Reference to where other details of the statistical analysis plan can be found, if not in the protocol</i>                                                                                                                                                                                                                                     | 14             |
|                                                           | 20b | <i>Methods for any additional analyses (eg, subgroup and adjusted analyses)</i>                                                                                                                                                                                                                                                                                                                                     | 14             |
|                                                           | 20c | <i>Definition of analysis population relating to protocol non-adherence (eg, as randomised analysis), and any statistical methods to handle missing data (eg, multiple imputation)</i>                                                                                                                                                                                                                              | 14             |

|                                 |     |                                                                                                                                                                                                                                                                                                                                              |        |
|---------------------------------|-----|----------------------------------------------------------------------------------------------------------------------------------------------------------------------------------------------------------------------------------------------------------------------------------------------------------------------------------------------|--------|
| <b>Methods: Monitoring</b>      |     |                                                                                                                                                                                                                                                                                                                                              |        |
| <i>Data monitoring</i>          | 21a | <i>Composition of data monitoring committee (DMC); summary of its role and reporting structure; statement of whether it is independent from the sponsor and competing interests; and reference to where further details about its charter can be found, if not in the protocol. Alternatively, an explanation of why a DMC is not needed</i> | 13-14  |
|                                 | 21b | <i>Description of any interim analyses and stopping guidelines, including who will have access to these interim results and make the final decision to terminate the trial</i>                                                                                                                                                               | 13-14  |
| <i>Harms</i>                    | 22  | <i>Plans for collecting, assessing, reporting, and managing solicited and spontaneously reported adverse events and other unintended effects of trial interventions or trial conduct</i>                                                                                                                                                     | 14-15  |
| <i>Auditing</i>                 | 23  | <i>Frequency and procedures for auditing trial conduct, if any, and whether the process will be independent from investigators and the sponsor</i>                                                                                                                                                                                           | 14-15  |
| <b>Ethics and dissemination</b> |     |                                                                                                                                                                                                                                                                                                                                              |        |
| <i>Research ethics</i>          | 24  | <i>Plans for seeking research ethics committee/institutional review board (REC/IRB) approval</i>                                                                                                                                                                                                                                             | 3; 15  |
| <i>Protocol amendments</i>      | 25  | <i>Plans for communicating important protocol modifications (eg, changes to eligibility criteria, outcomes, analyses) to relevant parties (eg, investigators, REC/IRBs, trial participants, trial registries, journals, regulators)</i>                                                                                                      | 4      |
| <i>Consent or assent</i>        | 26a | <i>Who will obtain informed consent or assent from potential trial participants or authorized surrogates, and how (see Item 32)</i>                                                                                                                                                                                                          | 11; 15 |
|                                 | 26b | <i>Additional consent provisions for collection and use of participant data and biological specimens in ancillary studies, if applicable</i>                                                                                                                                                                                                 | 12-13  |
| <i>Confidentiality</i>          | 27  | <i>How personal information about potential and enrolled participants</i>                                                                                                                                                                                                                                                                    | 12-13  |

|                                      |     |                                                                                                                                                                                                                                                                                            |                |
|--------------------------------------|-----|--------------------------------------------------------------------------------------------------------------------------------------------------------------------------------------------------------------------------------------------------------------------------------------------|----------------|
|                                      |     | <i>will be collected, shared, and maintained in order to protect confidentiality before, during, and after the trial</i>                                                                                                                                                                   |                |
| <i>Declaration of interests</i>      | 28  | <i>Financial and other competing interests for principal investigators for the overall trial and each study site</i>                                                                                                                                                                       | 17             |
| <i>Access to data</i>                | 29  | <i>Statement of who will have access to the final trial dataset, and disclosure of contractual agreements that limit such access for investigators</i>                                                                                                                                     | 12-13          |
| <i>Ancillary and post-trial care</i> | 30  | <i>Provisions, if any, for ancillary and post-trial care, and for compensation to those who suffer harm from trial participation</i>                                                                                                                                                       | Not applicable |
| <i>Dissemination policy</i>          | 31a | <i>Plans for investigators and sponsor to communicate trial results to participants, healthcare professionals, the public, and other relevant groups (eg, via publication, reporting in results databases, or other data sharing arrangements), including any publication restrictions</i> | 12-13          |
|                                      | 31b | <i>Authorship eligibility guidelines and any intended use of professional writers</i>                                                                                                                                                                                                      | 12-13          |
|                                      | 31c | <i>Plans, if any, for granting public access to the full protocol, participant-level dataset, and statistical code</i>                                                                                                                                                                     | 12-13          |
| <b>Appendices</b>                    |     |                                                                                                                                                                                                                                                                                            |                |
| <i>Informed consent materials</i>    | 32  | <i>Model consent form and other related documentation given to participants and authorized surrogates</i>                                                                                                                                                                                  | II             |
| <i>Biological specimens</i>          | 33  | <i>Plans for collection, laboratory evaluation, and storage of biological specimens for genetic or molecular analysis in the current trial and for future use in ancillary studies, if applicable</i>                                                                                      | Not applicable |

# BMJ Open

## Web-based Mindfulness and Skills Based Distress Reduction for Cancer Patients - Study Protocol of the Multicentre, Randomized, Controlled Confirmatory Intervention Trial Reduct

|                               |                                                                                                                                                                                                                                                                                                                                                                                                                                                                                                                                                                                                                                                                                                                                                                                                                                                                                                                                                                                                                                                                                                                                                                                                                                                                                                                                                                                                                                                                                                                                                                                                                                                                                                                                                                                                                                                                                                                                                                                                                                                                                                                                                                                                                                                                                                             |
|-------------------------------|-------------------------------------------------------------------------------------------------------------------------------------------------------------------------------------------------------------------------------------------------------------------------------------------------------------------------------------------------------------------------------------------------------------------------------------------------------------------------------------------------------------------------------------------------------------------------------------------------------------------------------------------------------------------------------------------------------------------------------------------------------------------------------------------------------------------------------------------------------------------------------------------------------------------------------------------------------------------------------------------------------------------------------------------------------------------------------------------------------------------------------------------------------------------------------------------------------------------------------------------------------------------------------------------------------------------------------------------------------------------------------------------------------------------------------------------------------------------------------------------------------------------------------------------------------------------------------------------------------------------------------------------------------------------------------------------------------------------------------------------------------------------------------------------------------------------------------------------------------------------------------------------------------------------------------------------------------------------------------------------------------------------------------------------------------------------------------------------------------------------------------------------------------------------------------------------------------------------------------------------------------------------------------------------------------------|
| Journal:                      | <i>BMJ Open</i>                                                                                                                                                                                                                                                                                                                                                                                                                                                                                                                                                                                                                                                                                                                                                                                                                                                                                                                                                                                                                                                                                                                                                                                                                                                                                                                                                                                                                                                                                                                                                                                                                                                                                                                                                                                                                                                                                                                                                                                                                                                                                                                                                                                                                                                                                             |
| Manuscript ID                 | bmjopen-2021-056973.R1                                                                                                                                                                                                                                                                                                                                                                                                                                                                                                                                                                                                                                                                                                                                                                                                                                                                                                                                                                                                                                                                                                                                                                                                                                                                                                                                                                                                                                                                                                                                                                                                                                                                                                                                                                                                                                                                                                                                                                                                                                                                                                                                                                                                                                                                                      |
| Article Type:                 | Protocol                                                                                                                                                                                                                                                                                                                                                                                                                                                                                                                                                                                                                                                                                                                                                                                                                                                                                                                                                                                                                                                                                                                                                                                                                                                                                                                                                                                                                                                                                                                                                                                                                                                                                                                                                                                                                                                                                                                                                                                                                                                                                                                                                                                                                                                                                                    |
| Date Submitted by the Author: | 17-Mar-2022                                                                                                                                                                                                                                                                                                                                                                                                                                                                                                                                                                                                                                                                                                                                                                                                                                                                                                                                                                                                                                                                                                                                                                                                                                                                                                                                                                                                                                                                                                                                                                                                                                                                                                                                                                                                                                                                                                                                                                                                                                                                                                                                                                                                                                                                                                 |
| Complete List of Authors:     | <p>Bäuerle, Alexander; University of Duisburg-Essen, Clinic for Psychosomatic Medicine and Psychotherapy, LVR-University Hospital; University Hospital Essen, Comprehensive Cancer Center (CCC)</p> <p>Martus, Peter; University Hospital Tübingen, Institute of Clinical Epidemiology and Applied Biostatistics, Eberhard Karls University Tübingen</p> <p>Erim, Yesim; University Hospital Erlangen, Department of Psychosomatic Medicine and Psychotherapy, Friedrich-Alexander-University Erlangen-Nürnberg</p> <p>Schug, Caterina; University Hospital Erlangen, Department of Psychosomatic Medicine and Psychotherapy, Friedrich-Alexander-University Erlangen-Nürnberg</p> <p>Heinen, Jana; University Hospital Tübingen, Department of Psychosomatic Medicine and Psychotherapy, Eberhard Karls University; University Hospital Tübingen, Comprehensive Cancer Center (CCC)</p> <p>Krakowczyk, Julia; University of Duisburg-Essen, Clinic for Psychosomatic Medicine and Psychotherapy, LVR-University Hospital; University Hospital Essen, Comprehensive Cancer Center (CCC)</p> <p>Steinbach, Jasmin; University of Duisburg-Essen, Clinic for Psychosomatic Medicine and Psychotherapy, LVR-University Hospital; University Hospital Essen, Comprehensive Cancer Center (CCC)</p> <p>Damerau, Mirjam; University of Duisburg-Essen, Clinic for Psychosomatic Medicine and Psychotherapy, LVR-University Hospital; University Hospital Essen, Comprehensive Cancer Center (CCC)</p> <p>Bethge, Wolfgang; University Hospital Tübingen, Centre of Clinical Trials (ZKS) Tübingen, Eberhard Karls University Tübingen</p> <p>Dinkel, Andreas; Technical University of Munich, Department of Psychosomatic Medicine and Psychotherapy, Klinikum rechts der Isar, School of Medicine</p> <p>Dries, Sebastian; Fraunhofer Institute for Software and Systems Engineering, Healthcare Department</p> <p>Mehnert, Anja ; University Medical Center Leipzig, Department of Medical Psychology and Medical Sociology</p> <p>Neumann, Anja; University of Duisburg-Essen, Institute of Health Care Management and Research</p> <p>Schadendorf, Dirk; University Hospital Essen, Department of Dermatology, University of Duisburg-Essen; University Hospital Essen, Comprehensive Cancer Center (CCC)</p> |

|                                 |                                                                                                                                                                                                                                                                                                                                                                                                                                                                                                                                                                                                                                                                                                                                                                                                                                                                                                                                                                                                                                                                 |
|---------------------------------|-----------------------------------------------------------------------------------------------------------------------------------------------------------------------------------------------------------------------------------------------------------------------------------------------------------------------------------------------------------------------------------------------------------------------------------------------------------------------------------------------------------------------------------------------------------------------------------------------------------------------------------------------------------------------------------------------------------------------------------------------------------------------------------------------------------------------------------------------------------------------------------------------------------------------------------------------------------------------------------------------------------------------------------------------------------------|
|                                 | Tewes, Mitra; University Hospital Essen, Department of Medical Oncology, University of Duisburg-Essen; University Hospital Essen, Comprehensive Cancer Center (CCC)<br>Wiltink, Jörg; University Medical Center of the Johannes Gutenberg-University Mainz, Department of Psychosomatic Medicine and Psychotherapy<br>Wünsch, Alexander; Freiburg Medical Center, Clinic for Psychosomatic Medicine and Psychotherapy, Albert-Ludwigs-Universität Freiburg<br>Zipfel, Stephan; University Hospital Tübingen, Department of Psychosomatic Medicine and Psychotherapy, Eberhard Karls University ; University Hospital Tübingen, Comprehensive Cancer Center (CCC)<br>Graf, Johanna; University Hospital Tübingen, Department of Psychosomatic Medicine and Psychotherapy, Eberhard Karls University; University Hospital Tübingen, Comprehensive Cancer Center (CCC)<br>Teufel, Martin; University of Duisburg-Essen, Clinic for Psychosomatic Medicine and Psychotherapy, LVR-University Hospital; University Hospital Essen, Comprehensive Cancer Center (CCC) |
| <b>Primary Subject Heading</b>: | Oncology                                                                                                                                                                                                                                                                                                                                                                                                                                                                                                                                                                                                                                                                                                                                                                                                                                                                                                                                                                                                                                                        |
| Secondary Subject Heading:      | Mental health                                                                                                                                                                                                                                                                                                                                                                                                                                                                                                                                                                                                                                                                                                                                                                                                                                                                                                                                                                                                                                                   |
| Keywords:                       | ONCOLOGY, Telemedicine < BIOTECHNOLOGY & BIOINFORMATICS, MENTAL HEALTH                                                                                                                                                                                                                                                                                                                                                                                                                                                                                                                                                                                                                                                                                                                                                                                                                                                                                                                                                                                          |
|                                 |                                                                                                                                                                                                                                                                                                                                                                                                                                                                                                                                                                                                                                                                                                                                                                                                                                                                                                                                                                                                                                                                 |

SCHOLARONE™  
Manuscripts

1  
2  
3 **Web-based Mindfulness and Skills Based Distress Reduction for Cancer Patients**  
4 **- Study Protocol of the Multicentre, Randomized, Controlled Confirmatory**  
5 **Intervention Trial Reduct**  
6  
7

8  
9 Alexander Bäuerle<sup>1,2</sup>, Peter Martus<sup>3</sup>, Yesim Erim<sup>4</sup>, Caterina Schug<sup>4</sup>, Jana Heinen<sup>5,6</sup>, Julia  
10 Barbara Krakowczyk<sup>1,2</sup>, Jasmin Steinbach<sup>1,2</sup>, Mirjam Damerou<sup>1,2</sup>, Wolfgang Bethge<sup>7</sup>,  
11 Andreas Dinkel<sup>8</sup>, Sebastian Dries<sup>9</sup>, Anja Mehnert-Theuerkauf<sup>10</sup>, Anja Neumann<sup>11</sup>, Dirk  
12 Schadendorf<sup>12,2</sup>, Mitra Tewes<sup>13,2</sup>, Jörg Wiltink<sup>14</sup>, Alexander Wunsch<sup>15</sup>, Stephan Zipfel<sup>5,6</sup>,  
13 Johanna Graf<sup>5,6+</sup>, Martin Teufel<sup>1,2+\*</sup>  
14  
15  
16

17  
18 <sup>1</sup>University of Duisburg-Essen, Clinic for Psychosomatic Medicine and Psychotherapy, LVR-  
19 University Hospital Essen  
20

21  
22 <sup>2</sup>University Hospital Essen, Comprehensive Cancer Center (CCC)  
23

24  
25 <sup>3</sup>Institute of Clinical Epidemiology and Applied Biostatistics (IKEaB), University Hospital  
26 Tübingen, Eberhard Karls University Tübingen  
27  
28

29  
30 <sup>4</sup>Department of Psychosomatic Medicine and Psychotherapy, University Hospital Erlangen,  
31 Friedrich-Alexander-University Erlangen-Nürnberg  
32

33  
34 <sup>5</sup>Department of Psychosomatic Medicine and Psychotherapy, University Hospital  
35 Tübingen, Eberhard Karls University  
36  
37

38  
39 <sup>6</sup>University Hospital Tübingen, Comprehensive Cancer Center (CCC)  
40

41  
42 <sup>7</sup>Centre of Clinical Trials (ZKS) Tübingen, University Hospital Tübingen, Eberhard Karls  
43 University Tübingen  
44  
45

46  
47 <sup>8</sup>Department of Psychosomatic Medicine and Psychotherapy, Klinikum rechts der Isar,  
48 School of Medicine, Technical University of Munich  
49

50  
51 <sup>9</sup>Fraunhofer Institute for Software and Systems Engineering, Healthcare Department  
52

53  
54 <sup>10</sup>Department of Medical Psychology and Medical Sociology, University Medical Center  
55 Leipzig  
56  
57

58  
59 <sup>11</sup>University of Duisburg-Essen, Institute of Health Care Management and Research  
60

1  
2  
3 <sup>12</sup>Department of Dermatology, University Hospital Essen, University of Duisburg-Essen  
4  
5

6 <sup>13</sup>Department of Medical Oncology, University Hospital Essen, University of Duisburg-  
7 Essen  
8  
9

10 <sup>14</sup>Department of Psychosomatic Medicine and Psychotherapy, University Medical Center of  
11 the Johannes Gutenberg- University Mainz  
12  
13

14 <sup>15</sup>Clinic for Psychosomatic Medicine and Psychotherapy, Freiburg Medical Center, Albert-  
15 Ludwigs-Universität Freiburg  
16  
17

18  
19  
20 +JG and MT contributed equally.  
21

22  
23 \*Corresponding author: Martin Teufel, University of Duisburg-Essen, Clinic for  
24 Psychosomatic Medicine and Psychotherapy, LVR-University Hospital Essen,  
25 martin.teufel@uni-due.de  
26  
27

## 28 29 **Abstract**

30 Introduction: Many cancer patients experience severe psychological distress, but as a  
31 result of various barriers, few of them receive psycho-oncological support. E-mental health  
32 interventions try to overcome some of these barriers and the limitation of health-care  
33 offers, enabling cancer patients to better cope with psychological distress. In the proposed  
34 trial, we aim to estimate the efficacy and cost-effectiveness of the manualized e-mental  
35 health intervention Make It Training- Mindfulness- and Skills-Based Distress Reduction in  
36 Oncology. Make It Training is a self-guided and web-based psycho-oncological intervention,  
37 which includes elements of cognitive behavioural therapy, mindfulness-based stress  
38 reduction, and acceptance and commitment therapy. The training supports the patients  
39 over a period of four months. We expect the Make It Training to be superior to treatment  
40 as usual optimized (TAU-O) in terms of reducing psychological distress after completing  
41 the intervention (T1, primary endpoint).  
42  
43

44 Methods and analysis: The study comprises a multicentre, prospective, randomized  
45 controlled confirmatory interventional trial with two parallel arms. The proposed trial  
46 incorporates four distinct measurement time points: the baseline assessment before  
47 randomization, a post-treatment assessment, and three- and six-month follow-up  
48 assessments. We will include patients who have received a cancer diagnosis in the past 12  
49 months, are in a curative treatment setting, are 18-65 years old, have given informed  
50 consent, and experience high perceived psychological distress (Hospital Anxiety and  
51 Depression Scale  $\geq 13$ ) for at least one week. Patients will be randomized into two groups  
52 (Make It vs. TAU-O). The aim is to allocate 600 cancer patients and include 556 into the  
53  
54  
55  
56  
57  
58  
59  
60



1  
2  
3 intention to treat analysis. The primary endpoint, distress, will be analysed using a  
4 baseline-adjusted ANCOVA for distress measurement once the intervention (T1) has been  
5 completed, with study arm as a binary factor, baseline as continuous measurement, and  
6 study centre as an additional categorical covariate.  
7

8  
9 Ethics and dissemination: The Ethics Committee of the Medical Faculty Essen has approved  
10 the study (21-10076-BO). Results will be published in peer-reviewed journals, conference  
11 presentations, the project website, and among self-help organizations.  
12

13 Trial registration: The Reduct trial is registered at the German Clinical Trial Register (DRKS)  
14 under the DRKS-ID: DRKS00025213.  
15  
16

### 17 18 **Strength and limitation of this study**

- 19  
20 - This prospective multicentre, randomized, controlled confirmatory intervention trial was  
21 developed using scientific evidence, theory and person-based practically orientated  
22 approaches.  
23  
24 - The intervention of this study provides low-threshold, time- and cost-effective support.  
25  
26 - The study only includes patients with access to the internet, as access is required in the  
27 intervention.  
28  
29

### 30 31 **Introduction**

32 In 2020, there were an estimated number of 19.3 million new cancer cases and almost  
33 10.0 million cancer deaths occurred worldwide.[1] Many cancer patients experience  
34 multiple physical and psychosocial problems during treatment and even for years  
35 afterward.[2] Every second cancer patient is significantly distressed and one-third of all  
36 cancer patients across tumour entities meet the criteria for at least one mental disorder at  
37 4-week prevalence.[3, 4] The results from the study of Mehnert and colleagues reveal that  
38 52.2% and 48.2% of patients with tumor stage one and two report elevated distress,  
39 respectively.[3] Indicating that, many patients in earlier tumor stages show high distress  
40 levels. The meta-analysis from Mitchell et al., published in Lancet Oncology concluded that  
41 the distress levels of patients in palliative and non-palliative care are comparable.[5]  
42 Concluding from these results, patients in palliative and non-palliative care are comparably  
43 burdened. However, the needs and demands are different between patients in palliative  
44 and non-palliative care. In cancer patients, distress strongly affects all aspects of their lives  
45 (e.g., work-life, family life), leads to decreased quality of life, causes financial problems,  
46 and results in a 4.4-fold higher risk of suicide compared to the general population.[6-8] In  
47 addition, adherence to cancer treatment can decrease due to severe distress.[9]  
48  
49 Cancer patients who used e-mental health interventions experienced significantly reduced  
50 levels of distress, depression, pain, fatigue, and anxiety.[10-18] E-mental health  
51 interventions have proven to be feasible and effective in improving quality of life.[10-18]  
52  
53 Recent scientific findings extend their effectiveness by suggesting significant effects on  
54  
55  
56  
57  
58  
59  
60

1  
2  
3 well-being in terms of distress, depression, and anxiety[11, 16-20], especially for web-  
4 based interventions that included cognitive behavioural therapy (CBT) techniques [10-15,  
5 17, 19, 21] or mindfulness-based stress reduction (MBSR).[17, 18, 20, 22] Matis and  
6 colleagues conclude in their systematic literature review that mindfulness-based eHealth  
7 interventions are feasible and effective in improving different outcomes in cancer patients  
8 [23]. Particularly in improving depression, anxiety, and post-traumatic growth. Different  
9 e-mental health interventions combined CBT and mindfulness techniques to support cancer  
10 patients. Internet mindfulness-based cognitive therapy (iMBCT) showed promising results  
11 in terms of psychological distress, depression and anxiety symptoms, and fear of cancer  
12 recurrence.[24]. One trial evaluating a therapist-assisted internet-based MBCT  
13 intervention for breast and prostate cancer survivors showed reduced depression and  
14 anxiety symptoms at post-intervention.[22] The effect was sustained for anxiety, but not  
15 for depression. In addition, two recent reviews on e-mental health interventions in (i)  
16 patients with breast cancer and (ii) young adult patients emphasized the impact of e-  
17 mental health interventions and stressed the need for well-designed multicentre RCTs.[25,  
18 26] Based on these findings, we propose to conduct the first multicentre prospective RCT  
19 on the efficacy of a self-guided e-mental health intervention Make It Training - Mindfulness  
20 and Skills Based Distress Reduction Training in Oncology, tailored to reduce distress and  
21 achieve well-being in patients with cancer.  
22  
23  
24  
25  
26  
27  
28  
29  
30  
31  
32

### 33 **Objectives and hypotheses**

34  
35 The objective of the proposed trial is to address distress in cancer patients and provide a  
36 low-threshold, cost-effective approach in the form of an e-mental health intervention. We  
37 aim to assess the efficacy of the e-mental health intervention Make It Training compared  
38 to treatment as usual optimized (TAU-O) in distressed cancer patients.  
39  
40  
41

42 *Primary hypothesis:* We expect the Make It Training to be superior to TAU-O in terms of  
43 reducing distress (T1) in cancer patients.

44  
45 *Secondary hypotheses:* We expect the Make It Training to be superior to TAU-O in terms  
46 of improving self-efficacy, quality of life, and mindfulness, and reducing depression and  
47 anxiety symptoms (T1, T2 & T3) as well as distress (T2 & T3) in patients with cancer.

48  
49 *Other study goals* are to evaluate client satisfaction, usability, time to dropout, and cost-  
50 effectiveness of the proposed intervention Make It Training compared to TAU-O.  
51 Furthermore, additional study aims are to establish and improve healthy coping  
52 mechanisms in cancer patients and explore predictors of usage as well as analyse the  
53 usage behaviour of the Make It Training. Furthermore, we will explore relations between  
54 the observed usage behaviour and other study outcomes.  
55  
56  
57  
58  
59  
60

### 61 **Methods**

1  
2  
3 This study protocol (Version 1.0; August 31st, 2021) is reported according to the SPIRIT  
4 checklist (see supplementary material I).[27] In case of important protocol modification  
5 will be reported to the sponsor (Federal Ministry of Education and Research), the ethics  
6 committees of the participating centres, and the trial registration will be updated.  
7  
8  
9

### 10 *Study design*

11  
12 The study comprises a multicentre, prospective, randomized controlled confirmatory  
13 interventional trial with two parallel arms. The proposed trial incorporates four distinct  
14 measurement time points (see Table 1 and Figure 1): the baseline assessment (T0) before  
15 randomization, a post-treatment assessment (T1), and three- and six-month follow-up  
16 assessments (T2 & T3). Additionally, continuous assessments are planned during the  
17 experimental intervention (in-treatment assessment; usage behaviour, distress,  
18 depression and anxiety symptoms, mindfulness, and self-efficacy). For the control group,  
19 data assessment during the control intervention (in-treatment assessments) is limited to  
20 measurement of distress, depression, and anxiety symptoms. The medical data (e.g.  
21 tumour entity, cancer treatment, tumour status, mental health diagnosis, previous mental  
22 health treatment, psychiatric medication; see supplementary material II for the complete  
23 case report forms) are taken from the patient's medical records at T0. Changes in the  
24 medical conditions of the patients will be continually assessed. Participants who drop out  
25 (no login for six weeks is considered as a dropout) will be contacted (if written permission  
26 for this purpose has been given before trial start) and asked to complete a dropout  
27 assessment. Before participation, written informed consent must be given. Table 1 displays  
28 the instruments used at each time point.  
29  
30  
31  
32  
33  
34  
35  
36  
37  
38  
39  
40  
41  
42  
43  
44  
45  
46  
47  
48  
49  
50  
51  
52  
53  
54  
55  
56  
57  
58  
59  
60

---- Please, insert Figure 1 here ----

### *Participant eligibility and recruitment*

We set the key inclusion and exclusion criteria in line with comparable and recent studies in psycho-oncology.[10, 11, 28] Participants will be included if they have a confirmed diagnosis of cancer in the past 12 months (initial diagnosis or recurrence), are engaged in a curative treatment setting, have an age of 18-65 years, high perceived distress (HADS  $\geq 13$ ) for at least one week, and have given their informed consent.

Patients with severe cognitive impairment and/or communication difficulties that compromise participation in the intervention, acute risk for suicide and/or severe depression according to clinical practice guidelines, other psychiatric or medical conditions requiring alternative treatment, known cerebral metastases, an age of  $> 65$ , no private internet access, and/or regularly contacting a mental health specialist will be excluded. We defined age of more than 65 years as an exclusion criterion because a German survey analyzing the internet literacy of cancer patients determined that while no significant differences regarding gender or age were seen, most of the cancer patients were younger than 70 years old. [29] In addition, representative data on the daily Internet use of the German population shows that Internet use decreases with age.[30]

The seven academic centers, which are involved in the recruitment, are: University Hospital Essen, University Hospital Tübingen, University Hospital Erlangen, Freiburg University Hospital, University Medical Center Leipzig, University Medical Center of the Johannes Gutenberg – University Mainz, Klinikum rechts der Isar of the Technical University of Munich. Participants are going to be recruited by study personnel and involved clinic personnel. Flyers and posters will be spread. In addition, information about the study and the involved staff will be presented online via social media and the study homepage (reduct-studie.de). Interested patients are able to ask questions regarding the study, e.g. its design and inclusion/exclusion criteria via E-Mail, phone or in persona.

### *Intervention*

Eligible patients will be randomly assigned to either the experimental intervention or the control condition TAU-O. Both interventions last four months.

*Experimental intervention: Make It Training.* The psycho-oncological Make It Training is a self-guided and patient-oriented e-mental health intervention for cancer patients to overcome distress and improve their well-being. In a previously published paper, the previous version of the intervention is described.[31]The Make It Training is based on the established, effective psychotherapeutic intervention techniques of MBSR, CBT, and acceptance and commitment therapy approaches used during the treatment of cancer patients. It aims to improve emotion management, mental strength, psychological resources, distress management, and self-efficacy. The Make It Training is designed to

1  
2  
3 accompany patients with cancer on their way for four months. The Make It Training consists  
4 of 16 modules. Each week, the patients are provided with a new module to help them to  
5 deal with the strains of the disease. Every module lasts approximately 30 minutes. The 16  
6 interactive modules (eight mandatory modules, eight optional modules, see Table 2)  
7 involve various media, including tutorial videos, audio-guided mindfulness exercises, an  
8 individual skills box, and an interactive skills training. At the beginning of each module,  
9 the patient is encouraged to focus on individually relevant issues, as each module starts  
10 with a short self-evaluation of their current distress level, skills, and mindfulness.  
11 Furthermore, at the end of each module, patients receive an individual summary of the  
12 finished module with individual results, a mindfulness exercise plan, and motivational  
13 notifications. During each module, patients collect helpful skills and exercises in their  
14 individual skills boxes. The intervention also involves homework assignments and MBSR  
15 exercises that should be integrated into the cancer patients' daily routines. Downloaded  
16 material can be used offline. Each Make It module is conceptualized to be completed within  
17 one week; after one week, the next module is delivered and trained. When a new module  
18 is available, patients receive a motivational notification via email. . The training can be  
19 conducted on the patients' private PC, tablet, or smartphone. See supplementary material  
20 III for screenshots of the web-based intervention.  
21  
22  
23  
24  
25  
26  
27  
28  
29  
30  
31

32 **Table 2: Overview of the 16 interventional modules**  
33  
34

|    | <b>Module</b>                                     | <b>Topic/Skills</b>                                                                                                                                         | <b>Mindfulness Practice</b>                     |
|----|---------------------------------------------------|-------------------------------------------------------------------------------------------------------------------------------------------------------------|-------------------------------------------------|
| 35 | <b>1.</b> Technical Introduction <sup>2</sup>     | Quick introduction to the app and how to handle it                                                                                                          |                                                 |
| 36 | <b>2.</b> <b>Welcome to your Path<sup>1</sup></b> | <b>Introduction to the structure of the Make It Training and to Mindfulness</b>                                                                             | <b>Mindful Breathing – Observing the Breath</b> |
| 37 | <b>3.</b> Health-related Behavior <sup>2</sup>    | Different aspects of promoting physical and mental health during cancer illness (diet, creating a daily structure, dealing with online health information). | Mindful Smelling                                |
| 38 | <b>4.</b> <b>Emotions<sup>1</sup></b>             | <b>Accepting and dealing with emotions such as anxiety, depression, or anger as a part of processing the cancer illness.</b>                                | <b>Mindful Experiencing</b>                     |
| 39 | <b>5.</b> Fear <sup>2</sup>                       | Dealing with cancer-related fears including fear of progression.                                                                                            | Thoughts to Feathers                            |
| 40 | <b>6.</b> <b>Pain<sup>1</sup></b>                 | <b>Understanding and dealing with cancer illness- and treatment-related pain.</b>                                                                           | <b>Body Scan I – Mindful Body Experience</b>    |
| 41 | <b>7.</b> Sleep <sup>2</sup>                      | Foundations of restful sleep: Strategies and the role of thoughts and emotions with a cancer illness                                                        | Mindfully Letting Go                            |
| 42 | <b>8.</b> <b>Activating Resources<sup>1</sup></b> | <b>Discovering and consciously using personal resources of strength during cancer disease.</b>                                                              | <b>Mindful Listening</b>                        |
| 43 |                                                   |                                                                                                                                                             |                                                 |
| 44 |                                                   |                                                                                                                                                             |                                                 |
| 45 |                                                   |                                                                                                                                                             |                                                 |
| 46 |                                                   |                                                                                                                                                             |                                                 |
| 47 |                                                   |                                                                                                                                                             |                                                 |
| 48 |                                                   |                                                                                                                                                             |                                                 |
| 49 |                                                   |                                                                                                                                                             |                                                 |
| 50 |                                                   |                                                                                                                                                             |                                                 |
| 51 |                                                   |                                                                                                                                                             |                                                 |
| 52 |                                                   |                                                                                                                                                             |                                                 |
| 53 |                                                   |                                                                                                                                                             |                                                 |
| 54 |                                                   |                                                                                                                                                             |                                                 |
| 55 |                                                   |                                                                                                                                                             |                                                 |
| 56 |                                                   |                                                                                                                                                             |                                                 |
| 57 |                                                   |                                                                                                                                                             |                                                 |
| 58 |                                                   |                                                                                                                                                             |                                                 |
| 59 |                                                   |                                                                                                                                                             |                                                 |
| 60 |                                                   |                                                                                                                                                             |                                                 |

|     |                                      |                                                                                                                                                                      |                                                      |
|-----|--------------------------------------|----------------------------------------------------------------------------------------------------------------------------------------------------------------------|------------------------------------------------------|
| 9.  | Positivity <sup>2</sup>              | Making room for positive experiences; noticing accomplishments and step-by-step planning.                                                                            | Mindful Moment                                       |
| 10. | <b>Body Awareness<sup>1</sup></b>    | <b>Dealing with cancer-related bodily changes by activating self-compassion and self-confidence.</b>                                                                 | <b>Body Scan II – Mindful Body Awareness</b>         |
| 11. | Exercise and Relaxation <sup>2</sup> | Finding a healthy balance between exercise and relaxation as a part of recovery during a cancer disease.                                                             | Mindful Breathing II – Triangle Breath               |
| 12. | <b>Stress Management<sup>1</sup></b> | <b>Mastering stressful cancer-related situations based on affirmative thoughts: The significance of thoughts for subjective experience and feelings of distress.</b> | <b>Mindful Vision</b>                                |
| 13. | Creativity <sup>2</sup>              | Exploring creativity as a resource of strength during cancer illness.                                                                                                | Mindful Doodling                                     |
| 14. | <b>Self-care<sup>1</sup></b>         | <b>Self-appreciation and self-care and its importance in the context of cancer; strengthening the pillars of self-esteem.</b>                                        | <b>Mindful Self-Compassion</b>                       |
| 15. | Relationships <sup>2</sup>           | Personal relationships as a resource and communicating health information and needs toward family and friends during cancer illness.                                 | Loving-Kindness                                      |
| 16. | <b>Looking back<sup>1</sup></b>      | <b>Review of Make It Training and helpful skills and using them beyond the training (Skillsbox).</b>                                                                 | <b>Favorite Mindfulness Practice OR Mindful Walk</b> |

Note. [1] Mandatory Module, [2] Additional Module

*Control intervention: Treatment as Usual optimized.* In the proposed RCT, the intervention group will be compared with an active control group as a placebo or null intervention control group would be ethically inappropriate. This refers to (i) standard treatments in the German healthcare system the patient can receive, (ii) the support to access those treatments. Patients receive all the information that is routinely provided as part of inpatient or outpatient treatment (e.g. how to find psychotherapy) In addition, the study team will help identify appropriate treatment options, if desired. (iii) TAU-O also included an active contingent, which will function as the 'optimized' part of the control intervention, explained in the rest of this paragraph. Patients in the control group have access to selected sets of offered web-based information. These information sets will be based on CBT and contain written psychoeducational information. The topics of these information sets are equivalent to the topics of the mandatory sessions of the intervention group (see Table 2). In total, the control group will receive access to eight modules over the course of four months. Every two weeks, a new set of non-interactive written information will briefly inform patients about the benefits of these skills during the course of the disease and motivate them to use these skills. No exercises, interactive worksheets, videos, audio material, and mindfulness exercises are given in the control condition, apart from the short psychoeducational information. The first information set contains an introduction to the treatment and support for finding access to selected treatments in Germany. We provided this structured information to make sure, every patient is informed about the various

1  
2  
3 treatment offers of the German healthcare system. The topics of the other modules are  
4 emotions, pain, resources, body awareness, stress management, and self-care. The last  
5 module is a retrospect of all the information sets offered and a reminder for applying the  
6 learned aspects in daily lives. Before starting a module, patients in the control group are  
7 presented with some short questions about their current distress level, mindfulness, and  
8 self-efficacy. All modules are designed to encourage patients to acquire further information  
9 on the relevant topics and to implement what they have learned in their daily lives. .In all  
10 modules, it is recorded at the end whether the patient is currently receiving  
11 psychotherapeutic treatment.  
12  
13  
14  
15  
16

### 17 18 *Reminders*

19 To ensure intervention adherence and fidelity, all participants will receive notifications that  
20 inform them when a new module is available. Therefore, patients in the experimental  
21 intervention group will receive one notification every week about the new available module.  
22 Patients in the control group will receive a reminder every second week about the new  
23 available module. Patients in the experimental group and the control group receive  
24 additional reminders after two and four weeks of inactivity in order to enhance motivation  
25 to log in. All notifications and reminders are standardized and sent via e-mail.  
26  
27  
28  
29  
30

31 We do not expect serious or adverse events (see *Ethical aspects*). In case of unexpected  
32 serious adverse events (e.g., risk for suicide, severe depressive symptomatology) all  
33 participants can consult an expert of the study team at their centre to receive appropriate  
34 support. The experimental intervention and control intervention is considered complete  
35 when at least five of eight mandatory modules have been completed.  
36  
37  
38  
39  
40

### 41 *Outcomes*

42 The primary outcome is distress at the end of the treatment (T1; see Table 1). To measure  
43 distress, we will use the total score of the Hospital Anxiety and Depression Scale  
44 (HADS).[32] The HADS was developed to assess possible distress in somatically-ill  
45 patients. It is a valid and objective self-rating patient-reported outcome measure and is a  
46 common instrument in psycho-oncological trials. It consists of two subscales, assessing  
47 symptoms of anxiety and depression, with each subscale comprising seven 4-point scale  
48 items. A validated German version is available and it is implemented in routine psycho-  
49 oncological care as well as in psycho-oncological research.[33]  
50

51 Large RCTs investigating the efficacy and effectiveness of psycho-oncological treatments  
52 have used distress as a primary or secondary outcome.[10, 11, 22, 34] Treatment  
53 guidelines for psycho-oncological treatment emphasize the importance of targeting and  
54 reducing distress in cancer patients (e.g., [35]).  
55  
56  
57  
58  
59  
60



1  
2  
3 Secondary endpoints for this study include (a) self-efficacy, (b) quality of life, (c)  
4 mindfulness, (d) distress over four assessment points, (e) distress and its longitudinal  
5 course, (f) depression and anxiety symptoms, (g) client satisfaction, (h) time to dropout,  
6 (i) cost-effectiveness, (j) predictors of usage, (k) coping skills, and (l) distress,  
7 mindfulness, and self-efficacy. These outcomes have been chosen based on  
8 recommendations by current treatment guidelines (German Clinical Practice Guideline) or  
9 on their establishment in previous psycho-oncological and e-mental health trials.[10, 11,  
10 34, 36] We will use validated instruments, self-generated items as well as usage data.

11  
12  
13  
14  
15 (a) Self-efficacy: For the assessment of self-efficacy, we will use the German version of  
16 the General Self-Efficacy Scale (GSES).[37] The GSES is a self-report measure of self-  
17 efficacy and optimistic self-beliefs related to coping with a variety of difficult demands in  
18 life as well as coping with all kinds of stressful life events. Responses are rated on a 4-  
19 point Likert scale for all ten items. It is available in 33 languages, and it is objective and  
20 validated in the German language.

21  
22  
23  
24 (b) Quality of life: We will apply two questionnaires to measure quality of life in the  
25 proposed trial. First, the widely used European Quality of Life 5 Dimensions 5 Level  
26 questionnaire (EQ-5D-5L) [38] will be used as a generic quality of life questionnaire and  
27 as the basis for cost-effectiveness analyses (see below). The EQ-5D-5L consists of five  
28 health-related dimensions, which can be scored on five levels. Additionally, the  
29 questionnaire includes one visual analogue scale to assess general health status. We will  
30 also use the European Organization for Research and Treatment of Cancer - Quality of Life  
31 Questionnaire (EORTC-QLQ-C30),[39] which was developed to assess the quality of life of  
32 cancer patients. It is composed of 30 items and incorporates nine multi-item scales: five  
33 functional scales (physical, role, cognitive, emotional, and social); three symptom scales  
34 (fatigue, pain, nausea, and vomiting); and one global health and quality of life scale.  
35 Several single-item symptom measures are also included. Responses are given on a 4-  
36 point Likert scale except for the items that evaluate the overall quality of life (items 29 and  
37 30), which are given on a 7-point Likert scale. We will use the validated and reliable  
38 German version.

39  
40  
41  
42  
43  
44  
45  
46  
47 (c) Mindfulness: To assess mindfulness, we will use the validated German version of the  
48 Freiburg Mindfulness Inventory (FMI).[40] It consists of 14 items, and all responses are  
49 given on a 4-point Likert scale.

50  
51  
52  
53  
54  
55  
56  
57  
58 (d) Distress over four assessment points: Distress assessed with the HADS will be modelled  
59 over the whole treatment period of each patient, with measurements taken at T0 (baseline  
60 assessment), T1 (post-treatment assessment), T2 (3 months follow-up assessment), and  
T3 (6 months follow-up assessment (see also Table 1). This will provide insights into  
changes of distress depending on various starting points of distress.

(e) Distress: Distress and its longitudinal course measured via the Distress Thermometer  
(DT) [41] will be analysed over the whole trial of each patient, with measurements taken

1  
2  
3 at T0 (baseline assessment), T1 (post-treatment assessment), T2 (3 months follow-up  
4 assessment), and T3 (6 months follow-up assessment). Furthermore, the DT will be applied  
5 twice in each module of the experimental and control intervention. DT is an efficient and  
6 convenient validated measurement of assessing distress. It is an established and rapid  
7 screening instrument for distress, which is presented as a visual thermometer using a scale  
8 from 0 (no distress) to 10 (extreme distress).  
9

10  
11  
12 (f) Depression and anxiety symptoms: We will use the Patient Health Questionnaire-4 (PHQ-  
13 4) [42] in its validated German version to measure depression and anxiety symptoms. The  
14 PHQ-4 is an established short questionnaire, which consists of four items: two items on  
15 depression (PHQ-2) and two items on generalized anxiety (Generalized Anxiety Disorder  
16 Scale-2, GAD-2). Answers are rated on a 4-point Likert scale for all four items. The PHQ-4  
17 will be applied over the whole trial of each patient with measurements taken at T0, T1, T2,  
18 and T3 (see also Table 1). During the experimental intervention, it will be applied in each  
19 module in order to track changes in the level of depression and anxiety during the course  
20 of the intervention. The PHQ-4 will be used during the control intervention as well.  
21

22  
23  
24 (g) Client satisfaction and usability: The Client Satisfaction Questionnaire adapted to  
25 Internet-based interventions [CSQ-I] [43] is an adapted German version of an eight-item  
26 client satisfaction questionnaire [ZUF-8] [44] used to assess the global satisfaction of  
27 participants with the internet-based intervention. Responses are given on a 4-point Likert  
28 scale for all items. Additionally, the German version of the System Usability Scale [SUS]  
29 [45] is used to assess the usability of the Make It Training. This questionnaire comprises  
30 10 items, which are to be rated on a 5-point Likert scale. Furthermore, self-generated  
31 items to evaluate specific aspects (e.g., content, videos) will be used. On top of that, we  
32 will use a healthcare smartphone app evaluation survey to determine if our tool is reliable  
33 and useful.[46]  
34

35  
36  
37 (h) Time to dropout and usage behaviour will be defined based on the number and type of  
38 modules completed, time per day, type and number of modules started, time since last  
39 login, frequency of login, frequency of each module, time for each module, % of each  
40 module completed, type and number of videos and audios started, and type and number  
41 of videos and audios finished. Patients who do not log in for six weeks are considered as  
42 dropouts.  
43

44  
45  
46 (i) Cost-effectiveness: The aim of the economic evaluation is to analyse the cost-  
47 effectiveness of the Make It Training by performing a cost-effectiveness- and a cost-utility-  
48 analysis from a payers' perspective. For the cost-utility analysis, quality-adjusted life years  
49 (QALYs) calculated based on utilities derived from the EQ-5D-5L questionnaire will be used  
50 as an effect measure. Resource use will be ascertained by questionnaire and will be  
51 evaluated in monetary units according to standards of health economics.  
52

53  
54  
55 (j) Predictors of usage: It is very important to assess predictors of actual usage behaviour  
56 because interventions can only be beneficial to those patients using the intervention.  
57  
58  
59  
60

Therefore, the predictors of actual usage behaviour/ uptake of the Make It Training will be evaluated. To this end, a modified version of the model based on the Unified Theory of Acceptance and Use of Technology (UTAUT) will be established.[47] Furthermore, internet-related variables will be established.

(k) Coping skills: Self-generated items to assess changes in coping skills will be used.

(l) Distress, mindfulness, and self-efficacy will be assessed by single items before the start of each module in both groups. This way, it will be possible to assess the change in these outcomes throughout the intervention.

**Table 1: Overview of the assessment schedule**

| Measures                                                               | Planned assessment time points |                     |                                          |                                           |                                            | Drop-out |
|------------------------------------------------------------------------|--------------------------------|---------------------|------------------------------------------|-------------------------------------------|--------------------------------------------|----------|
|                                                                        | Baseline<br>(T0 -<br>month 0)  | During<br>treatment | End of<br>treatment<br>(T1 -<br>month 4) | 3-month<br>Follow-up<br>(T2 -<br>month 7) | 6-month<br>Follow-up<br>(T3 -<br>month 10) |          |
| <b><u>Primary outcome</u></b>                                          |                                |                     |                                          |                                           |                                            |          |
| <b>Distress</b>                                                        |                                |                     |                                          |                                           |                                            |          |
| HADS                                                                   | x                              |                     | x                                        | x                                         | x                                          | x        |
| <b><u>Secondary outcomes</u></b>                                       |                                |                     |                                          |                                           |                                            |          |
| <b>Self-efficacy</b>                                                   |                                |                     |                                          |                                           |                                            |          |
| GSES                                                                   | x                              |                     | x                                        | x                                         | x                                          | x        |
| <b>Quality of Life</b>                                                 |                                |                     |                                          |                                           |                                            |          |
| EORTC-QLQ-C30                                                          |                                |                     |                                          |                                           |                                            | x        |
| EQ-5D-5L                                                               | x                              |                     | x                                        | x                                         | x                                          |          |
| <b>Mindfulness</b>                                                     |                                |                     |                                          |                                           |                                            |          |
| FMI                                                                    | x                              |                     | x                                        | x                                         | x                                          | x        |
| <b>Distress</b>                                                        |                                |                     |                                          |                                           |                                            |          |
| DT                                                                     |                                |                     |                                          |                                           |                                            | x        |
| HADS                                                                   | x                              | x                   | x                                        | x                                         | x                                          |          |
| <b>Depression &amp; Anxiety</b>                                        |                                |                     |                                          |                                           |                                            |          |
| PHQ-4                                                                  | x                              | x                   | x                                        | x                                         | x                                          | x        |
| <b>Internet related variables</b>                                      | x                              |                     |                                          |                                           |                                            |          |
| <b>Resource use</b>                                                    | x                              |                     |                                          | x                                         | x                                          |          |
| <b>Client satisfaction,<br/>usability, and predictors of<br/>usage</b> |                                |                     |                                          |                                           |                                            |          |
| CSQ-I                                                                  |                                |                     | x                                        |                                           |                                            | x        |

|                                                              |   |   |   |   |   |   |
|--------------------------------------------------------------|---|---|---|---|---|---|
| SUS                                                          |   |   | X |   |   | X |
| UTAUT                                                        | X |   |   |   |   |   |
| ETHSA                                                        |   |   | X |   |   | X |
| <b>Usage behaviour<sup>1</sup></b>                           |   | X |   |   |   |   |
| <b>Self-generated items<sup>2</sup></b>                      | X | X | X | X | X | X |
| <b>Demographic &amp; medical characteristics<sup>3</sup></b> | X |   |   |   |   |   |

Note: HADS = Hospital Anxiety and Depression Scale; GSES = General Self-Efficacy; EORTC-QLQ-C30 = European Organization for Research and Treatment of Cancer Quality of Life Questionnaire; EQ-5D-5L = European Quality of Life 5 Dimensions 5 Level Version; FMI = Freiburg Mindfulness Inventory; DT = Distress Thermometer; PHQ-4 = Patient Health Questionnaire-4; CSQ-I = Client Satisfaction Questionnaire adapted to Internet-based interventions; SUS = System Usability Scale; UTAUT = Unified theory of acceptance and use of technology model; ETHSA = Evaluation Tool for Healthcare Smartphone Applications.

<sup>1</sup> Usage behaviour refers to both groups. For the experimental group, it implies: Time per day, type and number of modules started, type and number of modules finished, time since last log in, frequency of log in, frequency of each module, time for each module, % of each module completed, type and number of videos and audios started, and type and number of videos and audios finished. For the control group, it implies: Time per day, type and number of "modules" displayed, time since last log in, frequency of log in, frequency of each "module", time for each "module", whereby a "module" is defined as brief written psychoeducational information.

<sup>2</sup> Self-generated items on acceptability, satisfaction with the Make It Training, mindfulness, self-efficacy, coping, and skills as well as eHealth related variables (e.g., internet experience).

<sup>3</sup> Changes in the medical conditions and social demographic parameters of the patients will be continually assessed

### *Trial procedure and timeline*

An overview of the trial flow and assessment schedule is presented in Figure 1 and Table 1, respectively. Trial duration for participants comprises 10 months (including 4 months of intervention). Once the interested patient contacts the study staff, a screening for eligibility will be applied and the patient will receive an explanation about the study conditions, data storage and data safety (oral and written). The patient will receive an appointment for the baseline diagnostic assessment to check for eligibility, which will take place in persona at the respective clinic. The patient will be included into the study, if inclusion criteria are met and exclusion criteria do not apply and the patient has given written informed consent. Once the patient is included into the study and the baseline assessment is completed, allocation into one of the following study groups will be applied via randomization: Make It Training (experimental group) or TAU-O (control group). The patients will be informed about their group allocation result and will receive an e-mail with the online link for the offered web-based program and a code to log in into this program and to be able to access the respective intervention (Make It Training or TAU-O).

1  
2  
3 After four months of experimental or control intervention a post-treatment diagnostic  
4 assessment and two follow-up diagnostic assessments will be implemented via a web-  
5 based survey 0, 3 and 6 months after the ending of the intervention. Patients receive  
6 reminder notifications (stepped intensity: E-mail, phone call) in case of non-completion of  
7 the assessments. In case of a dropout (no login for six weeks) during the intervention,  
8 those patients receive an E-Mail with an online link for a short questionnaire assessing  
9 reasons for their dropout.  
10  
11  
12  
13

### 14 15 *Sample size calculation*

16 The sample size planning is based on the publication of van den Berg et al., 2015.[11] In  
17 this publication, a dropout rate of 25% was assumed for the planning of the study, but  
18 only a 5% dropout rate was observed at T1 (primary endpoint). In our project, we  
19 conservatively assume a dropout rate of 20%, which to us seems to be a realistic  
20 assumption for an e-mental health intervention. Furthermore, we assume an equal dropout  
21 rate in both arms of the study and zero difference (after imputation, statistical analysis)  
22 between dropouts in both arms in terms of the primary endpoint. In the end, assuming an  
23 effect size of  $d$  for compliant patients, the true effect size expected in our study would be  
24  $0.80*d$ . Drawing on the paper of van den Berg et al., 2015 we expect an effect size of 0.37  
25 for a baseline adjusted analysis, drop outs excluded (the effect size of the unadjusted  
26 analysis was recalculated from Table 2 of van den Berg et al., 2015 [11] 0.36, so there  
27 was no relevant difference between adjusted and unadjusted analysis). Due to a small  
28 effect to be expected by the active control condition, we conservatively assume an effect  
29 size of 0.30 in our study. In summary, we assume an effect size of  $0.80*0.30=0.24$ .  
30 Accordingly, a sample size of 274 patients per group would be necessary. Note that  
31 dropouts are already included in this sample due to the effect shrinkage used in sample  
32 size calculation. To adjust for centre effects and baseline ( $df=6+1$ ) we need a total of 556  
33 recruited patients ( $n=278$  per study arm). Therefore, the goal of the study is to allocate  
34 600 patients and include 556 into the ITT analysis.  
35  
36  
37  
38  
39  
40  
41  
42  
43  
44  
45  
46

### 47 *Randomization and blinding*

48 Randomization will be applied via @secuTrial (www.secutrial.com) using a standard  
49 computer algorithm. @secuTrial will be provided by the Institute of Clinical Epidemiology  
50 and Applied Biostatistics (IKEaB), Medical Faculty Tübingen, Eberhard Karls University  
51 Tübingen. Stratification for study centres will be applied. The remaining prognostic factors  
52 are assumed to be balanced as a result of the randomization process. The randomization  
53 of participants and data monitoring will be ensured by the participating study centres.  
54 Blinding for both patients and therapists will be impossible in the trial, although assessors  
55 and statisticians (primary analysis) will be blinded to group allocation to ensure objective  
56 analyses and audits.  
57  
58  
59  
60

### *Data management, data storage, and dissemination policy*

To protect confidentiality, the participant's data will be pseudonymized and stored for at least ten years. Independent data management is ensured by the IKEaB. In line with the EU General Data Protection Regulations, we will use the established and structured procedures implemented at Tübingen University Hospitals (databases: @secuTrial). After the data-management plan (including digital data storing, archiving and regular plausibility checks) of the IKEaB, all standard operating procedures (SOPs) will be compliant with legal requirements. The data are entered electronically either by the study team or by the patients themselves. Paper-based source data will be entered to the electronic database. The conformity with the source data is monitored.

As per the guidelines of Good Clinical Practice (§13), all important trial data (including signed informed consents, patient identification lists, and original records of clinical findings) will be archived for 10 years after completion or termination of the trial. Patient documents will be stored in accordance with the time permitted by the hospitals (at least 10 years). Data in terms of usage behaviour will be stored anonymously on a server, placed in the Clinic for Psychosomatic Medicine and Psychotherapy, LVR Hospital Essen. As per the guidelines of Good Clinical Practice (§13), usage behaviour data will be stored 10 years after completion or termination of the trial. Only authorized staff (project team) have access to the ICH/GCP-compliant validated system (@secuTrial).

Data storage and sharing will be following Good Clinical Practice guidelines, Deutsche Forschungsgemeinschaft (DFG) guidelines, and the statements concerning data sharing in The New England Journal of Medicine.[48, 49] Data collected from the trial will be anonymously available in data repositories after the major results are published. The statistical analysis plan and all relevant documents will be stored and made available by request. Access to data storage will be restricted to authorized personnel. Patient consent forms will contain a section concerning the aforementioned aspects of data storage and data sharing.

We will set up a project homepage that will update the interested public on the progression of the trial, participation opportunities (e.g., workshops, conferences), and major results. The website will remain live beyond the core funding period, acting as a central access point for future research work and outputs and as an avenue to a longer dissemination legacy. The main results of the trial will be submitted for publication in an open-access peer-reviewed journal and will be made publicly available in the clinical trial registry. In addition to presenting the results at national and international conferences, we will regularly communicate scientific results in lay language via press releases, social media, and forums that are popular among patients. We will especially collaborate with our patient council and patient organizations in planning and implementing targeted and patient-oriented information campaigns to explain and disseminate the results to cancer-affected



1  
2  
3 persons and the public. For further dissemination and in-depth discussion of the results,  
4 we will involve the Comprehensive Cancer Center (CCC) network in Germany, and we will  
5 specifically rely on their expertise in promoting public awareness for psycho-oncological  
6 research.  
7  
8  
9

### 10 *Monitoring*

11 Monitoring will be provided by the Centre of Clinical Trials (ZKS), an independent clinical  
12 research unit of the University Hospital Tübingen, which is independent of clinics  
13 performing the study. The ZKS is responsible for the methodological quality of the proposed  
14 trial. The ZKS has set the highest-quality criteria according to the legal requirements for  
15 medicines and medical devices as well as according to the Good Clinical Practice guidelines.  
16 The ZKS quality management system is certified under DIN EN ISO 9001:2015. All  
17 activities connected with the proposed trial will be conducted in accordance with the SOPs  
18 of the ZKS. The monitoring plan includes a pre-trial visit, intermediate monitoring and a  
19 close-out visit in each recruiting centre. The data-monitoring plan includes the validation  
20 of written informed consent forms, documentation of (severe) adverse events, data validity  
21 of outcome measures with particular focus on source data transfer, validation of inclusion  
22 and exclusion criteria, and documentation of the ending of treatment and dropouts.  
23  
24  
25  
26  
27  
28  
29  
30  
31

### 32 *Statistical methods*

33 The primary aim of this trial is to demonstrate the superiority of the e-mental health  
34 intervention Make It Training in comparison to TAU-O in terms of distress in cancer  
35 patients. The primary endpoint, distress, will be analysed using a baseline (T0 assessment)  
36 -adjusted ANCOVA for distress measurement once the intervention (T1) has been  
37 completed, with study arm as binary factor, baseline as continuous measurement, and  
38 study centre as an additional categorical covariate. The primary analysis will be in the  
39 intention-to-treat population, with imputation of missing data in the case of dropouts.  
40 Intention to treat will be defined as all patients for whom the HADS scale is available at  
41 baseline. Additionally, it is expected that patient age and gender will be documented, and  
42 these variables will be used to impute missing values. Imputation will be computed using  
43 the SPSS module for multiple imputations with "monotone missing pattern" (as we will use  
44 complete data for gender, age, and baseline). The number of imputations will be 3000,  
45 and the seed will be set to the date of analysis (ddmmyy). Furthermore, it is expected that  
46 endpoint measurements might be obtained from at least a subsample of dropouts, which  
47 might improve the accuracy of imputation procedures. An interim analysis is not planned.  
48 Secondary analyses include mixed models for overall change in distress; self-efficacy;  
49 mindfulness; coping; depression and anxiety; and quality of life including physical  
50 condition, tumour entity, and treatment method; the analyses will use T0 as covariate and  
51 T1, T2, and T3 as dependent observations with a predefined analysis: interaction of group  
52  
53  
54  
55  
56  
57  
58  
59  
60



1  
2  
3 with contrasts estimation of adjusted mean and 95% CI. Furthermore, secondary endpoints  
4 will be analysed using a chi-square test and logistic regression for binary outcomes, t-  
5 tests, and linear models for continuous outcomes. Time to dropout will be analysed as a  
6 secondary endpoint itself, using the Kaplan-Meier estimate and the Cox proportional hazard  
7 regression. Separate tabulations and line listings of adverse events and severe adverse  
8 events will be ensured to analyse safety. Ratio of changes in resource use and of changes  
9 in primary endpoint and in quality of life will generate point estimates for the incremental  
10 cost-effectiveness ratio; to determine deterministic and probabilistic sensitivity a  
11 respective analysis will be performed.  
12  
13  
14  
15  
16  
17

### 18 *Ethical aspects*

19 From our view, the trial poses no ethical concerns. We are unaware of specific risks or  
20 disadvantages that might affect patients during the trial, and we expect no specific adverse  
21 or serious adverse events. In case of unexpected adverse or serious adverse events they  
22 will be documented and reported by the responsible monitoring unit. During the trial,  
23 patients will have access to telephone/video consultation or face-to-face contact with a  
24 member of the study team (psychologist or physician) if indicated as needed.  
25  
26  
27  
28

29 We evaluated the risk of the proposed trial based on published literature in similar trials  
30 conducted before.[10, 11, 50, 51]. Make It Training as well as TAU-O involves the chance  
31 of improvement of distress in cancer patients. Side effects of evidence-based  
32 psychotherapies are fortunately rather rare. Possible undesired effects may include  
33 transient worsening of symptoms.  
34  
35

36 The Ethics Committee of the University Hospitals Essen have approved the study (21-  
37 10076-BO). Written informed consent is mandatory for all patients to participate and will  
38 be obtained after providing oral and written information and prior to randomization. All  
39 participating patients can withdraw at any time without any disadvantage. The trial will be  
40 conducted in accordance with the tenets of the Declaration of Helsinki and the guidelines  
41 of Good Clinical Practice. Recruitment in the study centres will not begin until the study  
42 protocol has been approved and the relevant ethics committee has given its approval. A  
43 Data Safety and Monitoring Board (DSMB) has been implemented. The DSMB will supervise  
44 and monitor the proposed trial and is obliged to take appropriate actions where needed.  
45 The DSMB evaluates conformity of the trial with the study protocol as well as compliance  
46 with ethical criteria. The DSMB will decide whether practice is meeting the ethical criteria  
47 determined for this trial and/or whether the trial should be stopped. Adverse events and  
48 dropouts throughout the trial will be assessed and documented by the study team. The  
49 study team will be required to inform the DSMB if any adverse events or dropouts occur.  
50 Major events that need to be monitored include acute suicidality, suicidal acts, and clinically  
51 relevant increased symptomatology. Checks for causes of adverse events will be applied  
52 at each participating study centre.  
53  
54  
55  
56  
57  
58  
59  
60

### *Patient and public involvement*

Patients were involved in developing the Make It Training (the content of the modules, recommendations for enhancing usability) and in planning the proposed trial. We have established a patient council (consisting of five members) and involved the self-help organization Haus der Krebs-Selbsthilfe - Bundesverband e.V. to support the project team. Haus der Krebs-Selbsthilfe - Bundesverband e.V. is an established umbrella organization of many different cancer self-help organizations in Germany and is primarily funded by the non-profit organization German Cancer Aid Foundation. The patient council was consulted regarding research design, patient-friendly summaries, and consent forms, as well as regarding dissemination of results among patients and in academic publications. A participatory decision-making process between the patient council and the researchers was implemented and followed. The final case report forms were tested regarding comprehensibility, illustration, and duration of processing by the members of the patient council. During regular exchanges with the patient council, we will also mobilize different social media and self-help cancer groups to disseminate the trial's results. Patient involvement will be informed by the online resources of UK National Health Services (INVOLVE; <http://www.invo.org.uk/>). The public in the form of the Federal Ministry of Education and Research is the sponsor of this trial.

### **Discussion**

In our prospective, multicentre, randomized controlled confirmatory intervention trial (Reduct), we aim to assess the efficacy and cost-effectiveness of the e-mental health intervention Make It Training. The aim is to offer an evidence-based, efficient, cost-effective web-based psycho-oncological intervention in routine-care for individuals with cancer to reduce distress and enhance well-being.

The provision of care via e-mental health approaches aims to keep costs low for treating staff and premises, to offer care to many people at the same time, to promote continuity of care by being independent of time and place and to overcome the insufficient availability of specialized treatments by improving outreach. Thus, the training has socio- and health-economic benefits. By evaluating the efficacy of the Make It Training, important findings for e-mental health interventions in general and in the context of somatic diseases could be derived. Accordingly, other patient groups could benefit from similar e-mental health approaches as well.

Treatment guidelines for psycho-oncology emphasize the importance of targeting and reducing distress in cancer patients.[35] The initial results of e-mental health interventions have been promising for cancer patients.[10, 11, 52] Accordingly, RCTs are needed to evaluate e-mental health interventions in psycho-oncological care – especially self-guided interventions, with low cost-intensity and with outreach to outlying regions with limited

1  
2  
3 psycho-oncological offers.[11, 52-54] Given the increasing impact of digital technologies  
4 in daily life, the web-based Make It Training has the potential to reach high numbers of  
5 patients and to overcome barriers that patients face in analogue face-to-face care (e.g.,  
6 physical and psychological constraints due to cancer symptoms or treatments, limited  
7 psycho-oncological resources) [55]. Because it is accessible everywhere at any time, the  
8 Make It Training enables cancer patients to participate in psycho-oncological interventions  
9 regardless of barriers in the current health care system.[56] Younger cancer patients  
10 generally report more unmet needs and utilize less likely psycho-oncological services;[57]  
11 the e-mental health intervention meets their demands and requirements.

12  
13  
14  
15  
16 In conclusion, we expect the results to contribute to the knowledge on e-mental health  
17 interventions in general and especially for cancer patients and to overcome barriers or  
18 obstacles in everyday healthcare in order to offer significant benefits for both patient and  
19 provider.  
20  
21  
22

### 23 24 **List of Abbreviations**

25 CBT = cognitive behavioural therapy

26 MBSR = mindfulness-based stress reduction

27 iMBCT = Internet mindfulness-based cognitive therapy

28 TAU-O = treatment as usual optimized

29 RCT(s) = randomized controlled trial(s)

30 SOPs = standard operating procedures

31 IKEaB = Institute of Clinical Epidemiology and Applied Biostatistics

32 ZKS = Centre of Clinical Trials  
33  
34  
35  
36  
37  
38

39 **Authors' contributions:** Funding for this trial was obtained by MT (PI), AB (trial  
40 coordinator), JG (Co-PI), and YE (Co-PI). PM provided statistical and methodical expertise  
41 in trial design and is the principal trial statistician. PM is responsible for data management  
42 during the trial. CS, JH, JK, MD, AD, AM-T, DS, JS, MT, JW, AW, and SZ are trial site  
43 investigators who contributed to refinement of the study design and protocol,  
44 implementation of the trial and who are involved regarding patient recruitment, treatment,  
45 and data collection. JG, AB, CS, JK, and JH developed and further adapted the intervention  
46 and prepared the content for eHealth adaption. SD is responsible for the intervention's IT  
47 infrastructure and provided important feedback on eHealth-related issues. SZ is senior  
48 consultant within in the trial. AN provided health economic expertise in the trial design and  
49 is responsible for the health economic evaluations. WB is head of the Centre of Clinical  
50 Trials (ZKS), which is responsible for quality assurance, monitoring, and adherence to the  
51 study protocol. All authors contributed to refinement of the study protocol. AB drafted the  
52 manuscript and all co-authors critically reviewed it and approved the final version of the  
53 manuscript.  
54  
55  
56  
57  
58  
59  
60

**Funding statement:** This research received financial sponsoring from the Federal Ministry of Education and Research (01KG2021). The funding source has no role in the design of this study and will not have any role during its execution, analyses, interpretation of the data, or decision to submit results.

**Competing interest statement:** The authors declare that they have no financial or competing interest.

## References

1. Sung H, Ferlay J, Siegel RL, et al. Global Cancer Statistics 2020: GLOBOCAN Estimates of Incidence and Mortality Worldwide for 36 Cancers in 185 Countries. *CA Cancer J Clin.* 2021;71(3):209-49.
2. Murray CJL, Vos T, Lozano R, et al. Disability-adjusted life years (DALYs) for 291 diseases and injuries in 21 regions, 1990–2010: a systematic analysis for the Global Burden of Disease Study 2010. *The Lancet.* 2012;380(9859):2197-223.
3. Mehnert A, Hartung TJ, Friedrich M, et al. One in two cancer patients is significantly distressed: Prevalence and indicators of distress. *Psychooncology.* 2018;27(1):75-82.
4. Mehnert A, Brahler E, Faller H, et al. Four-week prevalence of mental disorders in patients with cancer across major tumor entities. *J Clin Oncol.* 2014;32(31):3540-6.
5. Mitchell AJ, Chan M, Bhatti H, et al. Prevalence of depression, anxiety, and adjustment disorder in oncological, haematological, and palliative-care settings: A metaanalysis of 94 interview-based studies. *Lancet Oncol.* 2011;12(2):160-174.
6. Singer S, Das-Munshi J, Brahler E. Prevalence of mental health conditions in cancer patients in acute care--a meta-analysis. *Ann Oncol.* 2010;21(5):925-30.
7. Buttner M, Konig HH, Lobner M, et al. Out-of-pocket-payments and the financial burden of 502 cancer patients of working age in Germany: results from a longitudinal study. *Support Care Cancer.* 2019;27(6):2221-8.
8. Zaorsky NG, Zhang Y, Tuanquin L, et al. Suicide among cancer patients. *Nat Commun.* 2019;10(1):207.
9. Park CL, Gaffey AE. Relationships between psychosocial factors and health behavior change in cancer survivors: an integrative review. *Ann Behav Med.* 2007;34(2):115-34.
10. Urech C, Grossert A, Alder J, et al. Web-Based Stress Management for Newly Diagnosed Patients With Cancer (STREAM): A Randomized, Wait-List Controlled Intervention Study. *J Clin Oncol.* 2018;36(8):780-8.
11. van den Berg SW, Gielissen MF, Custers JA, et al. BREATH: Web-Based Self-Management for Psychological Adjustment After Primary Breast Cancer--Results of a Multicenter Randomized Controlled Trial. *J Clin Oncol.* 2015;33(25):2763-71.
12. Smith SK, MacDermott K, Amarasekara S, et al. Reimagine: a randomized controlled trial of an online, symptom self-management curriculum among breast cancer survivors. *Support Care Cancer.* 2019;27(5):1775-81.
13. Chambers SK, Ritterband LM, Thorndike F, et al. Web-Delivered Cognitive Behavioral Therapy for Distressed Cancer Patients: Randomized Controlled Trial. *J Med Internet Res.* 2018;20(1):e42.
14. Cheung EO, Cohn MA, Dunn LB, et al. A randomized pilot trial of a positive affect skill intervention (lessons in linking affect and coping) for women with metastatic breast cancer. *Psychooncology.* 2017;26(12):2101-8.
15. Beatty L, Koczwara B, Wade T. Evaluating the efficacy of a self-guided Web-based CBT intervention for reducing cancer-distress: a randomised controlled trial. *Support Care Cancer.* 2016;24(3):1043-51.

16. Dowd H, Hogan MJ, McGuire BE, et al. Comparison of an Online Mindfulness-based Cognitive Therapy Intervention With Online Pain Management Psychoeducation: A Randomized Controlled Study. *Clin J Pain*. 2015;31(6):517-27.
17. Wootten AC, Abbott JA, Meyer D, et al. Preliminary results of a randomised controlled trial of an online psychological intervention to reduce distress in men treated for localised prostate cancer. *Eur Urol*. 2015;68(3):471-9.
18. Cillessen L, Schellekens MPJ, Van de Ven MOM, et al. Consolidation and prediction of long-term treatment effect of group and online mindfulness-based cognitive therapy for distressed cancer patients. *Acta Oncol*. 2018;57(10):1293-302.
19. Ham K, Chin S, Suh YJ, et al. Preliminary Results From a Randomized Controlled Study for an App-Based Cognitive Behavioral Therapy Program for Depression and Anxiety in Cancer Patients. *Front Psychol*. 2019;10:1592.
20. Russell L, Ugalde A, Orellana L, et al. A pilot randomised controlled trial of an online mindfulness-based program for people diagnosed with melanoma. *Support Care Cancer*. 2019;27(7):2735-46.
21. Jim HSL, Hyland KA, Nelson AM, et al. Internet-assisted cognitive behavioral intervention for targeted therapy-related fatigue in chronic myeloid leukemia: Results from a pilot randomized trial. *Cancer*. 2020;126(1):174-80.
22. Nissen ER, O'Connor M, Kaldo V, et al. Internet-delivered mindfulness-based cognitive therapy for anxiety and depression in cancer survivors: A randomized controlled trial. *Psychooncology*. 2020;29(1):68-75.
23. Matis J, Svetlak M, Slezackova A, et al. Mindfulness-Based Programs for Patients With Cancer via eHealth and Mobile Health: Systematic Review and Synthesis of Quantitative Research. *J Med Internet Res*. 2020;22(11): e20709. doi: 10.2196/20709
24. Compen F, Bisseling E, Schellekens M, et al. Face-to-Face and Internet-Based Mindfulness-Based Cognitive Therapy Compared With Treatment as Usual in Reducing Psychological Distress in Patients With Cancer: A Multicenter Randomized Controlled Trial. *J Clin Oncol*. 2018;36(23):2413-2421.
25. Triberti S, Savioni L, Sebri V, et al. eHealth for improving quality of life in breast cancer patients: A systematic review. *Cancer Treat Rev*. 2019;74:1-14.
26. McCann L, McMillan KA, Pugh G. Digital Interventions to Support Adolescents and Young Adults With Cancer: Systematic Review. *JMIR Cancer*. 2019;5(2):e12071.
27. Chan AW, Tetzlaff JM, Altman DG, et al. SPIRIT 2013 statement: defining standard protocol items for clinical trials. *Ann Intern Med*. 2013;158(3):200-7.
28. Sharpe M, Walker J, Hansen CH, et al. Integrated collaborative care for comorbid major depression in patients with cancer (SMaRT Oncology-2): a multicentre randomised controlled effectiveness trial. *The Lancet*. 2014;384(9948):1099-108.
29. Holmes MM. Why People Living With and Beyond Cancer Use the Internet. *Integr Cancer Ther*. 2019;18:1534735419829830.
30. D21-Digital-Index 2020/2021. Jährliches Lagebild zur Digitalen Gesellschaft. Initiative D21. [https://initia-tived21.de/app/uploads/2021/02/d21-digital-index-2020\\_2021.pdf](https://initia-tived21.de/app/uploads/2021/02/d21-digital-index-2020_2021.pdf) Accessed: March 2022.
31. Bäuerle A, Teufel M, Schug C, et al. Web-based MINDfulness and Skills-based distress reduction in cancer (MINDS): study protocol for a multicentre observational healthcare study. *BMJ Open*. 2020;10(8):e036466. doi:10.1136/bmjopen-2019-036466
32. Zigmond AS, Snaith RP. The hospital anxiety and depression scale. *Acta Psychiatr Scand*. 1983;67(6):361-70.
33. Petermann F. Hospital Anxiety and Depression Scale, Deutsche Version (HADS-D). *Zeitschrift für Psychiatrie, Psychologie und Psychotherapie*. 2011;59(3):251-3.
34. Murphy MJ, Newby JM, Butow P, et al. Randomised controlled trial of internet-delivered cognitive behaviour therapy for clinical depression and/or anxiety in cancer survivors (iCanADAPT Early). *Psychooncology*. 2020;29(1):76-85.
35. Leitlinienprogramm Onkologie (Deutsche Krebsgesellschaft DK, AWMF). Psychoonkologische Diagnostik, Beratung und Behandlung von erwachsenen Krebspatienten 2014 [Langversion 1.1:[Available from: <http://leitlinienprogramm-onkologie.de/Leitlinien.7.0.html>



- 1
- 2
- 3 36. Brebach R, Sharpe L, Costa DS, et al. Psychological intervention targeting distress
- 4 for cancer patients: a meta-analytic study investigating uptake and adherence.
- 5 *Psychooncology*. 2016;25(8):882-90.
- 6 37. Schwarzer R JM. Generalized Self-Efficacy scale. Weinman J WS, Johnston M,
- 7 editor. UK: NFER-NELSON Windsor; 1995.
- 8 38. Herdman M, Gudex C, Lloyd A, et al. Development and preliminary testing of the
- 9 new five-level version of EQ-5D (EQ-5D-5L). *Qual Life Res*. 2011;20(10):1727-36.
- 10 39. Aaronson NK, Ahmedzai S, Bergman B, et al. The European Organization for
- 11 Research and Treatment of Cancer QLQ-C30: a quality-of-life instrument for use in
- 12 international clinical trials in oncology. *J Natl Cancer Inst*. 1993;85(5):365-76.
- 13 40. Walach H, Buchheld N, Buttenmüller V, et al. Measuring mindfulness—the Freiburg
- 14 Mindfulness Inventory (FMI). *Personality and Individual Differences*. 2006;40(8):1543-
- 15 55.
- 16 41. Mehnert A, Müller D, Lehmann C, et al. Die deutsche Version des NCCN Distress-
- 17 Thermometers. *Zeitschrift für Psychiatrie, Psychologie und Psychotherapie*.
- 18 2006;54(3):213-23.
- 19 42. Lowe B, Wahl I, Rose M, et al. A 4-item measure of depression and anxiety:
- 20 validation and standardization of the Patient Health Questionnaire-4 (PHQ-4) in the
- 21 general population. *J Affect Disord*. 2010;122(1-2):86-95.
- 22 43. Boss L, Lehr D, Reis D, et al. Reliability and Validity of Assessing User Satisfaction
- 23 With Web-Based Health Interventions. *J Med Internet Res*. 2016;18(8):e234.
- 24 44. Schmidt JN, Rüdiger. ZUF-8. Fragebogen zur Messung der Patientenzufriedenheit.
- 25 : Hogrefe; 2002.
- 26 45. J B. SUS: A. 'quickand dirty' usability scale. Jordan PW TB, Weerdmeester BA,
- 27 McClelland IL, editor. London, Bristol, PA Taylor & Francis; 1996.
- 28 46. Jin M, Kim J. Development and Evaluation of an Evaluation Tool for Healthcare
- 29 Smartphone Applications. *Telemed J E Health*. 2015;21(10):831-7.
- 30 47. Venkatesh, Morris, Davis, et al. User Acceptance of Information Technology:
- 31 Toward a Unified View. *MIS Quarterly*. 2003;27(3).
- 32 48. Switula D. Principles of good clinical practice (GCP) in clinical research. *Sci Eng*
- 33 *Ethics*. 2000;6(1):71-7.
- 34 49. Taichman DB, Sahni P, Pinborg A, et al. Data Sharing Statements for Clinical Trials
- 35 - A Requirement of the International Committee of Medical Journal Editors. *N Engl J Med*.
- 36 2017;376(23):2277-9.
- 37 50. Zainal NZ, Booth S, Huppert FA. The efficacy of mindfulness-based stress
- 38 reduction on mental health of breast cancer patients: a meta-analysis. *Psychooncology*.
- 39 2013;22(7):1457-65.
- 40 51. Rush SE, Sharma M. Mindfulness-Based Stress Reduction as a Stress Management
- 41 Intervention for Cancer Care: A Systematic Review. *J Evid Based Complementary Altern*
- 42 *Med*. 2017;22(2):348-60.
- 43 52. Butow P, Smith A. Systematic reviews of pain and online interventions for cancer
- 44 patients show evidence of mixed efficacy and highlight need for more rigorously designed
- 45 research. *Patient Educ Couns*. 2015;98(3):267-8.
- 46 53. Bouma G, Admiraal JM, de Vries EG, et al. Internet-based support programs to
- 47 alleviate psychosocial and physical symptoms in cancer patients: a literature analysis.
- 48 *Crit Rev Oncol Hematol*. 2015;95(1):26-37.
- 49 54. Kooistra LC, Wiersma JE, Ruwaard J, et al. Cost and Effectiveness of Blended
- 50 Versus Standard Cognitive Behavioral Therapy for Outpatients With Depression in
- 51 Routine Specialized Mental Health Care: Pilot Randomized Controlled Trial. *J Med Internet*
- 52 *Res*. 2019;21(10):e14261.
- 53 55. Leykin Y, Thekdi SM, Shumay DM, et al. Internet interventions for improving
- 54 psychological well-being in psycho-oncology: review and recommendations.
- 55 *Psychooncology*. 2012;21(9):1016-25.
- 56 56. Zebrack BJ, Block R, Hayes-Lattin B, et al. Psychosocial service use and unmet
- 57 need among recently diagnosed adolescent and young adult cancer patients. *Cancer*.
- 58 2013;119(1):201-14.
- 59
- 60

1  
2  
3 57. Dilworth S, Higgins I, Parker V, et al. Patient and health professional's perceived  
4 barriers to the delivery of psychosocial care to adults with cancer: a systematic review.  
5 Psychooncology. 2014;23(6):601-12.  
6  
7  
8  
9  
10  
11  
12  
13  
14  
15  
16  
17  
18  
19  
20  
21  
22  
23  
24  
25  
26  
27  
28  
29  
30  
31  
32  
33  
34  
35  
36  
37  
38  
39  
40  
41  
42  
43  
44  
45  
46  
47  
48  
49  
50  
51  
52  
53  
54  
55  
56  
57  
58  
59  
60

For peer review only



1  
2  
3 **Figure legends**  
4  
5

6 **Figure 1.** Trial flow of the REDUCT trial.  
7  
8  
9  
10  
11  
12  
13  
14  
15  
16  
17  
18  
19  
20  
21  
22  
23  
24  
25  
26  
27  
28  
29  
30  
31  
32  
33  
34  
35  
36  
37  
38  
39  
40  
41  
42  
43  
44  
45  
46  
47  
48  
49  
50  
51  
52  
53  
54  
55  
56  
57  
58  
59  
60

For peer review only

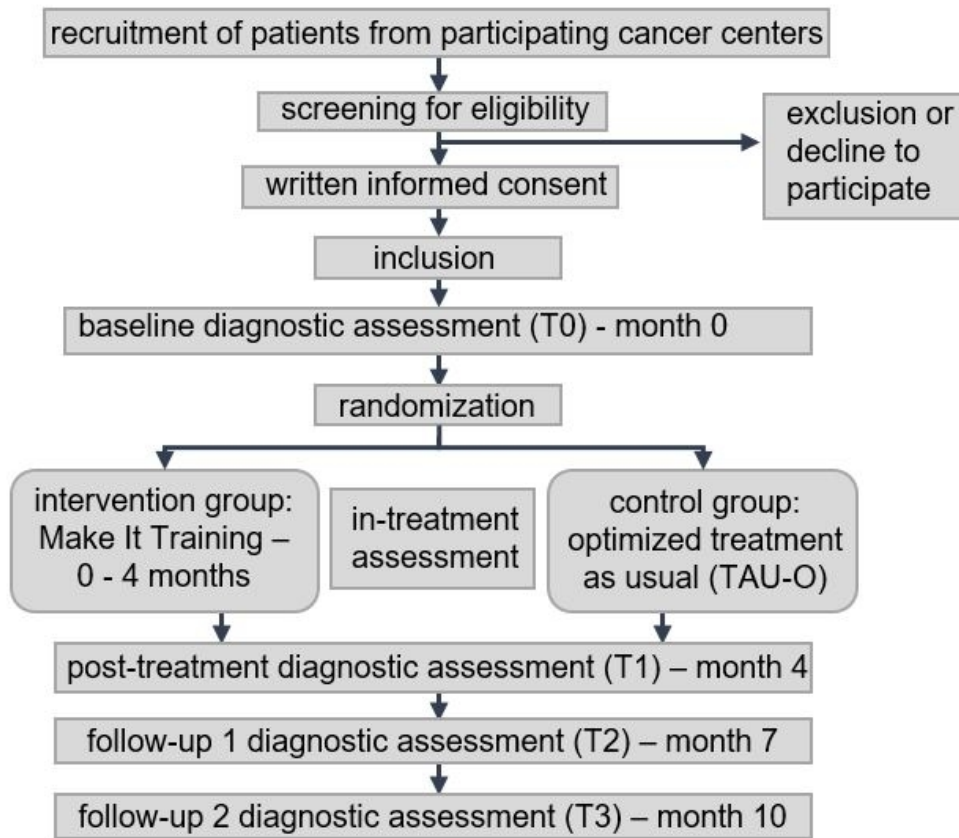

Figure 1. Trial flow of the REDUCT trial.

168x148mm (96 x 96 DPI)

1  
2  
3  
4  
5  
6  
7  
8  
9 **Web-based Mindfulness and Skills Based Distress Reduction for Cancer Patients**  
10 **- Study Protocol of the Multicentre, Randomized, Controlled Confirmatory**  
11 **Intervention Trial Reduct**  
12  
13

14  
15 **by Bäuerle et al., 2021**  
16

17  
18 **Supplementary material I**  
19  
20  
21  
22  
23  
24  
25  
26  
27  
28  
29  
30  
31  
32  
33  
34  
35  
36  
37  
38  
39  
40  
41  
42  
43  
44  
45  
46  
47  
48  
49  
50  
51  
52  
53  
54  
55  
56  
57  
58  
59  
60

For peer review only

**Table 1:** SPIRIT Guidelines

| <i>Selection/item</i>             | <i>Item no</i> | <i>Description</i>                                                                                                                                                                                                                                                                              | <i>Addressed on page no</i> |
|-----------------------------------|----------------|-------------------------------------------------------------------------------------------------------------------------------------------------------------------------------------------------------------------------------------------------------------------------------------------------|-----------------------------|
| <b>Administrative Information</b> |                |                                                                                                                                                                                                                                                                                                 |                             |
| Title                             | 1              | <i>Descriptive title identifying the study design, population, interventions, and, if applicable, trial acronym</i>                                                                                                                                                                             | 1                           |
| Trial registration                | 2a             | <i>Trial identifier and registry name. If not yet registered, name of intended registry</i>                                                                                                                                                                                                     | 3                           |
|                                   | 2b             | <i>All items from the World Health Organization Trial Registration Data Set</i>                                                                                                                                                                                                                 | 1-17                        |
| Protocol version                  | 3              | <i>Date and version identifier</i>                                                                                                                                                                                                                                                              | 4                           |
| Funding                           | 4              | <i>Sources and types of financial, material, and other support</i>                                                                                                                                                                                                                              | 17                          |
| Roles and responsibilities        | 5a             | <i>Names, affiliations, and roles of protocol contributors</i>                                                                                                                                                                                                                                  | 1-2; 17                     |
|                                   | 5b             | <i>Name and contact information for the trial sponsor</i>                                                                                                                                                                                                                                       | 17                          |
|                                   | 5c             | <i>Role of study sponsor and funders, if any, in study design; collection, management, analysis, and interpretation of data; writing of the report; and the decision to submit the report for publication, including whether they will have ultimate authority over any of these activities</i> | 17                          |
|                                   | 5d             | <i>Composition, roles, and responsibilities of the coordinating centre, steering committee, endpoint adjudication committee, data management team, and other individuals or groups overseeing the trial, if applicable (see Item 21a for data monitoring committee)</i>                         | 12-16                       |
| <b>Introduction</b>               |                |                                                                                                                                                                                                                                                                                                 |                             |
| Background and rationale          | 6a             | <i>Description of research question and justification for undertaking the trial, including summary of relevant studies (published and unpublished) examining benefits and harms for each intervention</i>                                                                                       | 2                           |
|                                   | 6b             | <i>Explanation for choice of comparators</i>                                                                                                                                                                                                                                                    | 3                           |

|                                                           |     |                                                                                                                                                                                                                                                                                                |             |
|-----------------------------------------------------------|-----|------------------------------------------------------------------------------------------------------------------------------------------------------------------------------------------------------------------------------------------------------------------------------------------------|-------------|
| Objectives                                                | 7   | Specific objectives or hypotheses                                                                                                                                                                                                                                                              | 3           |
| Trial design                                              | 8   | Description of trial design including type of trial (eg, parallel group, crossover, factorial, single group), allocation ratio, and framework (eg, superiority, equivalence, noninferiority, exploratory)                                                                                      | 3           |
| <b>Methods: Participants, interventions, and outcomes</b> |     |                                                                                                                                                                                                                                                                                                |             |
| Study setting                                             | 9   | Description of study settings (eg, community clinic, academic hospital) and list of countries where data will be collected. Reference to where list of study sites can be obtained                                                                                                             | 5-6         |
| Eligibility criteria                                      | 10  | Inclusion and exclusion criteria for participants. If applicable, eligibility criteria for study centres and individuals who will perform the interventions (eg, surgeons, psychotherapists)                                                                                                   | 5           |
| Interventions                                             | 11a | Interventions for each group with sufficient detail to allow replication, including how and when they will be administered                                                                                                                                                                     | 6-7         |
|                                                           | 11b | Criteria for discontinuing or modifying allocated interventions for a given trial participant (eg, drug dose change in response to harms, participant request, or improving/worsening disease)                                                                                                 | 4; 9; 14-15 |
|                                                           | 11c | Strategies to improve adherence to intervention protocols, and any procedures for monitoring adherence (eg, drug tablet return, laboratory tests)                                                                                                                                              | 6-7; 13-14  |
|                                                           | 11d | Relevant concomitant care and interventions that are permitted or prohibited during the trial                                                                                                                                                                                                  | 5-7         |
| Outcomes                                                  | 12  | Primary, secondary, and other outcomes, including the specific measurement variable (eg, systolic blood pressure), analysis metric (eg, change from baseline, final value, time to event), method of aggregation (eg, median, proportion), and time point for each outcome. Explanation of the | 7-11        |

|                                             |     |                                                                                                                                                                                                                                                                                                                                                                 |          |
|---------------------------------------------|-----|-----------------------------------------------------------------------------------------------------------------------------------------------------------------------------------------------------------------------------------------------------------------------------------------------------------------------------------------------------------------|----------|
|                                             |     | <i>clinical relevance of chosen efficacy and harm outcomes is strongly recommended</i>                                                                                                                                                                                                                                                                          |          |
| <i>Participant timeline</i>                 | 13  | <i>Time schedule of enrolment, interventions (including any run-ins and washouts), assessments, and visits for participants. A schematic diagram is highly recommended (see Figure 1)</i>                                                                                                                                                                       | 5; 10-11 |
| <i>Sample size</i>                          | 14  | <i>Estimated number of participants needed to achieve study objectives and how it was determined, including clinical and statistical assumptions supporting any sample size calculations</i>                                                                                                                                                                    | 11-12    |
| <i>Recruitment</i>                          | 15  | <i>Strategies for achieving adequate participant enrolment to reach target sample size</i>                                                                                                                                                                                                                                                                      | 5-6      |
| <b>Methods: Assignment of interventions</b> |     |                                                                                                                                                                                                                                                                                                                                                                 |          |
| <i>Allocation</i>                           |     |                                                                                                                                                                                                                                                                                                                                                                 |          |
| <i>Sequence generation</i>                  | 16a | <i>Method of generating the allocation sequence (eg, computer-generated random numbers), and list of any factors for stratification. To reduce predictability of a random sequence, details of any planned restriction (eg, blocking) should be provided in a separate document that is unavailable to those who enrol participants or assign interventions</i> | 12       |
| <i>Allocation concealment mechanism</i>     | 16b | <i>Mechanism of implementing the allocation sequence (eg, central telephone; sequentially numbered, opaque, sealed envelopes), describing any steps to conceal the sequence until interventions are assigned</i>                                                                                                                                                | 12       |
| <i>Implementation</i>                       | 16c | <i>Who will generate the allocation sequence, who will enrol participants, and who will assign participants to interventions</i>                                                                                                                                                                                                                                | 12       |
| <i>Blinding (masking)</i>                   | 17a | <i>Who will be blinded after assignment to interventions (eg, trial participants, care providers, outcome assessors, data analysts), and how</i>                                                                                                                                                                                                                | 12       |

|                                                           |     |                                                                                                                                                                                                                                                                                                                                                                                                                     |                |
|-----------------------------------------------------------|-----|---------------------------------------------------------------------------------------------------------------------------------------------------------------------------------------------------------------------------------------------------------------------------------------------------------------------------------------------------------------------------------------------------------------------|----------------|
|                                                           | 17b | <i>If blinded, circumstances under which unblinding is permissible, and procedure for revealing a participant's allocated intervention during the trial</i>                                                                                                                                                                                                                                                         | 12             |
| <b>Methods: Data collection, management, and analysis</b> |     |                                                                                                                                                                                                                                                                                                                                                                                                                     |                |
| <i>Data collection methods</i>                            | 18a | <i>Plans for assessment and collection of outcome, baseline, and other trial data, including any related processes to promote data quality (eg, duplicate measurements, training of assessors) and a description of study instruments (eg, questionnaires, laboratory tests) along with their reliability and validity, if known. Reference to where data collection forms can be found, if not in the protocol</i> | 7-14           |
|                                                           | 18b | <i>Plans to promote participant retention and complete follow-up, including list of any outcome data to be collected for participants who discontinue or deviate from intervention protocols</i>                                                                                                                                                                                                                    | 4-5; 10-11; 14 |
| <i>Data management</i>                                    | 19  | <i>Plans for data entry, coding, security, and storage, including any related processes to promote data quality (eg, double data entry; range checks for data values). Reference to where details of data management procedures can be found, if not in the protocol</i>                                                                                                                                            | 12-13          |
| <i>Statistical methods</i>                                | 20a | <i>Statistical methods for analysing primary and secondary outcomes. Reference to where other details of the statistical analysis plan can be found, if not in the protocol</i>                                                                                                                                                                                                                                     | 14             |
|                                                           | 20b | <i>Methods for any additional analyses (eg, subgroup and adjusted analyses)</i>                                                                                                                                                                                                                                                                                                                                     | 14             |
|                                                           | 20c | <i>Definition of analysis population relating to protocol non-adherence (eg, as randomised analysis), and any statistical methods to handle missing data (eg, multiple imputation)</i>                                                                                                                                                                                                                              | 14             |



|                                 |     |                                                                                                                                                                                                                                                                                                                                              |        |
|---------------------------------|-----|----------------------------------------------------------------------------------------------------------------------------------------------------------------------------------------------------------------------------------------------------------------------------------------------------------------------------------------------|--------|
| <b>Methods: Monitoring</b>      |     |                                                                                                                                                                                                                                                                                                                                              |        |
| <i>Data monitoring</i>          | 21a | <i>Composition of data monitoring committee (DMC); summary of its role and reporting structure; statement of whether it is independent from the sponsor and competing interests; and reference to where further details about its charter can be found, if not in the protocol. Alternatively, an explanation of why a DMC is not needed</i> | 13-14  |
|                                 | 21b | <i>Description of any interim analyses and stopping guidelines, including who will have access to these interim results and make the final decision to terminate the trial</i>                                                                                                                                                               | 13-14  |
| <i>Harms</i>                    | 22  | <i>Plans for collecting, assessing, reporting, and managing solicited and spontaneously reported adverse events and other unintended effects of trial interventions or trial conduct</i>                                                                                                                                                     | 14-15  |
| <i>Auditing</i>                 | 23  | <i>Frequency and procedures for auditing trial conduct, if any, and whether the process will be independent from investigators and the sponsor</i>                                                                                                                                                                                           | 14-15  |
| <b>Ethics and dissemination</b> |     |                                                                                                                                                                                                                                                                                                                                              |        |
| <i>Research ethics</i>          | 24  | <i>Plans for seeking research ethics committee/institutional review board (REC/IRB) approval</i>                                                                                                                                                                                                                                             | 3; 15  |
| <i>Protocol amendments</i>      | 25  | <i>Plans for communicating important protocol modifications (eg, changes to eligibility criteria, outcomes, analyses) to relevant parties (eg, investigators, REC/IRBs, trial participants, trial registries, journals, regulators)</i>                                                                                                      | 4      |
| <i>Consent or assent</i>        | 26a | <i>Who will obtain informed consent or assent from potential trial participants or authorized surrogates, and how (see Item 32)</i>                                                                                                                                                                                                          | 11; 15 |
|                                 | 26b | <i>Additional consent provisions for collection and use of participant data and biological specimens in ancillary studies, if applicable</i>                                                                                                                                                                                                 | 12-13  |
| <i>Confidentiality</i>          | 27  | <i>How personal information about potential and enrolled participants</i>                                                                                                                                                                                                                                                                    | 12-13  |

|                                      |     |                                                                                                                                                                                                                                                                                            |                |
|--------------------------------------|-----|--------------------------------------------------------------------------------------------------------------------------------------------------------------------------------------------------------------------------------------------------------------------------------------------|----------------|
|                                      |     | <i>will be collected, shared, and maintained in order to protect confidentiality before, during, and after the trial</i>                                                                                                                                                                   |                |
| <i>Declaration of interests</i>      | 28  | <i>Financial and other competing interests for principal investigators for the overall trial and each study site</i>                                                                                                                                                                       | 17             |
| <i>Access to data</i>                | 29  | <i>Statement of who will have access to the final trial dataset, and disclosure of contractual agreements that limit such access for investigators</i>                                                                                                                                     | 12-13          |
| <i>Ancillary and post-trial care</i> | 30  | <i>Provisions, if any, for ancillary and post-trial care, and for compensation to those who suffer harm from trial participation</i>                                                                                                                                                       | Not applicable |
| <i>Dissemination policy</i>          | 31a | <i>Plans for investigators and sponsor to communicate trial results to participants, healthcare professionals, the public, and other relevant groups (eg, via publication, reporting in results databases, or other data sharing arrangements), including any publication restrictions</i> | 12-13          |
|                                      | 31b | <i>Authorship eligibility guidelines and any intended use of professional writers</i>                                                                                                                                                                                                      | 12-13          |
|                                      | 31c | <i>Plans, if any, for granting public access to the full protocol, participant-level dataset, and statistical code</i>                                                                                                                                                                     | 12-13          |
| <b>Appendices</b>                    |     |                                                                                                                                                                                                                                                                                            |                |
| <i>Informed consent materials</i>    | 32  | <i>Model consent form and other related documentation given to participants and authorized surrogates</i>                                                                                                                                                                                  | II             |
| <i>Biological specimens</i>          | 33  | <i>Plans for collection, laboratory evaluation, and storage of biological specimens for genetic or molecular analysis in the current trial and for future use in ancillary studies, if applicable</i>                                                                                      | Not applicable |

Teilnehmer-ID: \_\_\_\_\_

# Reduct- Web-Basierte Achtsamkeits- und Skillsbasierte Stressreduktion für Patientinnen und Patienten mit Krebs

Liebe Teilnehmerin, lieber Teilnehmer,

wir freuen uns, dass Sie uns bei unserer Studie unterstützen. Im Folgenden werden Sie nun einen Fragebogen ausfüllen, mit dessen Hilfe wir Daten zur Ihrer Lebenssituation, Ihr psychisches Befinden, Ihre Einstellung zu digitalen Gesundheitsanwendungen sowie Ihre Nutzung von digitalen Technologien allgemein erheben. Wir bitten Sie daher die folgenden Fragen möglichst genau zu beantworten. Der Fragebogen wird ca. 15-20 Minuten Ihrer Zeit in Anspruch nehmen.

Nachdem Sie unseren Fragebogen bearbeitet haben, werden Sie weitere Informationen sowie ihre Zugangsdaten für die Web-App erhalten.

Sollten Sie Fragen haben, können Sie gerne jederzeit eine E-Mail an [reduct@uni-due.de](mailto:reduct@uni-due.de) senden.

Wenn Sie merken, dass Sie sich sehr belastet fühlen und Sie mehr Unterstützung bei der Bewältigung Ihrer Erkrankung benötigen, können Sie sich jederzeit an die/den Studienverantwortliche/n Ihres Zentrums [1] wenden. Diese/r kann Ihnen bei der Suche psychoonkologischer Hilfsangebote zur Seite stehen.

Wir wünschen Ihnen weiterhin alles Gute und danken Ihnen für das Ausfüllen des Fragebogens

Ihr Reduct Team

\*Kontaktdaten

[2]

**I. Fragen zu Soziodemographischen Daten**

**1.1. Füllen Sie den Fragebogen gerade im Rahmen einer stationären Behandlung aus?**

ja

nein

**1.2. Geschlecht:**

weiblich

männlich

inter/ divers

**1.3. Alter:**

\_\_\_\_\_ Jahre

**1.4. Familienstand**

ledig

verheiratet

in Partnerschaft lebend

geschieden/ getrennt

verwitwet

sonstiges (bitte nennen) \_\_\_\_\_

**1.5. Wie viele Personen leben in Ihrem Haushalt?**

- 1 Person
- 2 Personen
- 3 Personen
- 4 Personen
- 5 Personen
- mehr als 5 Personen, nämlich: \_\_\_\_\_

**1.6. Haben Sie Kinder?**

- ja  nein

**1.7. Leben Kinder dauerhaft in Ihrem Haushalt, die von Ihnen versorgt werden?**

- ja  nein

**1.8. Bitte geben Sie an, in welcher Art Stadt oder Gemeinde Sie wohnen:**

- Großstadt (ab 100.000 Einwohner)
- Mittelstadt (ab 20.000 Einwohner)
- Kleinstadt (ab 5.000 Einwohner)
- Landgemeinde (unter 5.000 Einwohner)

**1.9. Bitte geben Sie Ihren höchsten Bildungsabschluss an:**

- abgeschlossenes (Fach-) Hochschulstudium
- Fachabitur/Abitur
- Realschulabschluss

- 1  
2  
3  
4  Hauptschule/ Volksschule  
5  
6  kein Schlussabschluss  
7  
8  sonstiges (bitte nennen) \_\_\_\_\_  
9

## 1.10. Bitte geben Sie an, welcher Beschäftigungsstatus auf Sie zutrifft.

- 10  
11  
12  
13  
14  
15  noch in Ausbildung (Ausbildung, Studium etc.)  
16  
17 wenn ja:  
18  Aktiv, keine längere Unterbrechungen aufgrund der Erkrankung  
19  Derzeit krankgeschrieben/ Urlaubssemester  
20  
21  
22  Erwerbstätig  
23  
24 wenn ja:  
25  
26  Teilzeitbeschäftigt  
27  Vollzeitbeschäftigt  
28  geringfügig beschäftigt (Minijob)  
29  Zeitarbeit  
30  Sonstiges (bitte nennen) \_\_\_\_\_  
31  
32  
33  
34  nicht erwerbstätig  
35  
36 wenn ja:  
37  
38  derzeit krankgeschrieben  
39  berufsunfähig, wenn zutreffend:  
40 wenn ja:  seit der Krebserkrankung  schon vorher  
41  
42  berentet/pensioniert  
43  Sonstiges (bitte nennen) \_\_\_\_\_  
44  
45  
46  
47  
48

## 1.11. Ist/war Ihre finanzielle Situation durch Ihre Krebserkrankung belastet?

49  
50  
51 1  
52 Nicht  
53 belastet

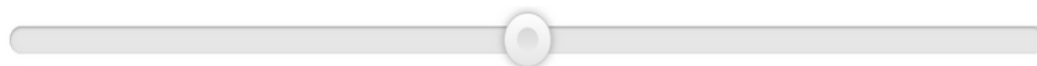

10  
54 Sehr  
55 belastet

1  
2  
3  
4  
5  
6  
7  
8  
9  
10  
11  
12  
13  
14  
15  
16  
17  
18  
19  
20  
21  
22  
23  
24  
25  
26  
27  
28  
29  
30  
31  
32  
33  
34  
35  
36  
37  
38  
39  
40  
41  
42  
43  
44  
45  
46  
47  
48  
49  
50  
51  
52  
53  
54  
55  
56  
57  
58  
59  
60

### 1.12. Wie schätzen Sie Ihre finanzielle Situation ein?

1  
Schlecht

10  
Gut

Da wir messen wollen, ob und wie das Reduct-Angebot von allen Bevölkerungsgruppen, also ebenfalls von Migranten und ausländischen Mitbürgern, angenommen wird, stellen wir Ihnen Fragen zur Nationalität.

### 1.13. Besitzen Sie die deutsche Staatsangehörigkeit?

- ja  nein

Wenn ja:

- seit Geburt  
 seit \_\_\_\_\_ (bitte, Jahreszahl einsetzen)

### 1.14 Besitzen/besaßen Ihre Eltern beide die deutsche Staatsangehörigkeit seit der Geburt?

- ja  nein

## 2. Belastungsthermometer

Bitte markieren Sie am Thermometer die Zahl, die am besten beschreibt, wie belastet Sie sich in der letzten Woche einschließlich heute gefühlt haben.

10 Extrem belastet  
9  
8  
7  
6  
5  
4  
3  
2  
1  
0 Gar nicht belastet



### 3. Skala zur Allgemeinen Selbstwirksamkeitserwartung

Kreuzen Sie bitte bei jeder Frage die Antwort an, die am besten auf Sie zutrifft.

|                                                                                                    | Stimmt<br>nicht | Stimmt<br>kaum | Stimmt<br>eher | Stimmt<br>genau |
|----------------------------------------------------------------------------------------------------|-----------------|----------------|----------------|-----------------|
| 3.1. Wenn sich Widerstände auftun, finde ich Mittel und Wege, mich durchzusetzen.                  | 1               | 2              | 3              | 4               |
| 3.2. Die Lösung schwieriger Probleme gelingt mir immer, wenn ich mich darum bemühe.                | 1               | 2              | 3              | 4               |
| 3.3. Es bereitet mir keine Schwierigkeiten, meine Absichten und Ziele zu verwirklichen.            | 1               | 2              | 3              | 4               |
| 3.4. In unerwarteten Situationen weiß ich immer, wie ich mich verhalten soll.                      | 1               | 2              | 3              | 4               |
| 3.5. Auch bei überraschenden Ereignissen glaube ich, dass ich gut mit ihnen zurechtkommen kann.    | 1               | 2              | 3              | 4               |
| 3.6. Schwierigkeiten sehe ich gelassen entgegen, weil ich meinen Fähigkeiten immer vertrauen kann. | 1               | 2              | 3              | 4               |
| 3.7. Was auch immer passiert, ich werde schon klarkommen.                                          | 1               | 2              | 3              | 4               |
| 3.8. Für jedes Problem kann ich eine Lösung finden.                                                | 1               | 2              | 3              | 4               |
| 3.9. Wenn eine neue Sache auf mich zukommt, weiß ich, wie ich damit umgehen kann.                  | 1               | 2              | 3              | 4               |
| 3.10. Wenn ein Problem auftaucht, kann ich es aus eigener Kraft meistern.                          | 1               | 2              | 3              | 4               |

**4. Lebensqualität (EORT-QLQ-C30)**

Bitte kreuzen Sie im Folgenden Abschnitt die Zahl von 1 bis 4 an, die am besten auf Sie zutrifft.

For peer review only

|                                                                                                                                      | Überhaupt<br>nicht | Wenig | Mäßig | Sehr |
|--------------------------------------------------------------------------------------------------------------------------------------|--------------------|-------|-------|------|
| 4.1. Bereitet es Ihnen Schwierigkeiten, sich körperlich anzustrengen (z.B. eine schwere Einkaufstasche oder einen Koffer zu tragen)? | 1                  | 2     | 3     | 4    |
| 4.2. Bereitet es Ihnen Schwierigkeiten, einen <u>längeren</u> Spaziergang zu machen?                                                 | 1                  | 2     | 3     | 4    |
| 4.3. Bereitet es Ihnen Schwierigkeiten, eine <u>kurze</u> Strecke außer Haus zu gehen?                                               | 1                  | 2     | 3     | 4    |
| 4.4. Müssen Sie tagsüber im Bett liegen oder in einem Sessel sitzen?                                                                 | 1                  | 2     | 3     | 4    |
| 4.5. Brauchen Sie Hilfe beim Essen, Anziehen, Waschen oder Benutzen der Toilette?                                                    | 1                  | 2     | 3     | 4    |
| <b>Während der letzten Woche:</b>                                                                                                    |                    |       |       |      |
|                                                                                                                                      | Überhaupt<br>nicht | Wenig | Mäßig | Sehr |
| 4.6. Waren Sie bei Ihrer Arbeit oder bei anderen tagtäglichen Beschäftigungen eingeschränkt?                                         | 1                  | 2     | 3     | 4    |
| 4.7. Waren Sie bei Ihren Hobbys oder andere Freizeitbeschäftigungen eingeschränkt?                                                   | 1                  | 2     | 3     | 4    |
| 4.8. Waren Sie kurzatmig?                                                                                                            | 1                  | 2     | 3     | 4    |
| 4.9. Hatten Sie Schmerzen?                                                                                                           | 1                  | 2     | 3     | 4    |
| 4.10. Mussten Sie sich ausruhen?                                                                                                     | 1                  | 2     | 3     | 4    |

4.11. Hatten Sie Schlafstörungen?

1 2 3 4

4.12. Fühlten Sie sich schwach?

1 2 3 4

**Während der letzten Woche:**

**Überhaupt  
nicht**

**Wenig**

**Mäßig**

**Sehr**

4.13. Hatten Sie Appetitmangel?

1 2 3 4

4.14. War Ihnen übel?

1 2 3 4

4.15. Haben Sie erbrochen?

1 2 3 4

4.16. Hatten Sie Verstopfung?

1 2 3 4

4.17. Hatten Sie Durchfall?

1 2 3 4

4.18. Waren Sie müde?

1 2 3 4

4.19. Fühlten Sie sich durch  
Schmerzen in Ihrem alltäglichen  
Leben beeinträchtigt?

1 2 3 4

4.20. Hatten Sie Schwierigkeiten, sich  
auf etwas zu konzentrieren, z.B. auf  
das Zeitungslesen oder das  
Fernsehen?

1 2 3 4

4.21. Fühlten Sie sich angespannt?

1 2 3 4

4.22. Haben Sie sich Sorgen  
gemacht?

1 2 3 4

4.23. Waren Sie reizbar?

1 2 3 4

4.24. Fühlten Sie sich  
niedergeschlagen?

1 2 3 4

4.25. Hatten Sie Schwierigkeiten, sich  
an Dinge zu erinnern?

1 2 3 4

4.26. Hat Ihr körperlicher Zustand oder Ihre medizinische Behandlung Ihr Familienleben beeinträchtigt?

|   |   |   |   |
|---|---|---|---|
| 1 | 2 | 3 | 4 |
|---|---|---|---|

4.27. Hat Ihr körperlicher Zustand oder Ihre medizinische Behandlung Ihr Zusammensein oder Ihre gemeinsamen Unternehmungen mit anderen Menschen beeinträchtigt?

|   |   |   |   |
|---|---|---|---|
| 1 | 2 | 3 | 4 |
|---|---|---|---|

4.28. Hat Ihr körperlicher Zustand oder Ihre medizinische Behandlung für Sie finanzielle Schwierigkeiten mit sich gebracht?

|   |   |   |   |
|---|---|---|---|
| 1 | 2 | 3 | 4 |
|---|---|---|---|

**Bitte kreuzen Sie bei den folgenden Fragen die Zahl zwischen 1 und 7 an, die am besten auf Sie zutrifft.**

4.29. Wie würden Sie insgesamt Ihren Gesundheitszustand während der letzten Woche einschätzen?

|                  |   |   |   |   |   |               |
|------------------|---|---|---|---|---|---------------|
| 1                | 2 | 3 | 4 | 5 | 6 | 7             |
| sehr<br>schlecht |   |   |   |   |   | ausgezeichnet |

4.30. Wie würden Sie insgesamt Ihre Lebensqualität während der letzten Woche einschätzen?

|                  |   |   |   |   |   |               |
|------------------|---|---|---|---|---|---------------|
| 1                | 2 | 3 | 4 | 5 | 6 | 7             |
| sehr<br>schlecht |   |   |   |   |   | ausgezeichnet |

## 5. Lebensqualität (EQ-5D-5L)

Bitte kreuzen Sie unter jeder Überschrift das Kästchen an, das Ihren Gesundheitszustand heute am besten beschreibt.

### 5.1. Beweglichkeit/Mobilität

- |                                         |   |
|-----------------------------------------|---|
| Ich habe keine Probleme herumzugehen    | 1 |
| Ich habe leichte Probleme herumzugehen  | 2 |
| Ich habe mäßige Probleme herumzugehen   | 3 |
| Ich habe große Probleme herumzugehen    | 4 |
| Ich bin nicht in der Lage, herumzugehen | 5 |

### 5.2. Für sich selbst sorgen

- |                                                                   |   |
|-------------------------------------------------------------------|---|
| Ich habe keine Probleme, mich selbst zu waschen oder anzuziehen   | 1 |
| Ich habe leichte Probleme, mich selbst zu waschen oder anzuziehen | 2 |
| Ich habe mäßige Probleme, mich selbst zu waschen oder anzuziehen  | 3 |
| Ich habe große Probleme, mich selbst zu waschen oder anzuziehen   | 4 |
| Ich bin nicht in der Lage, mich selbst zu waschen oder anzuziehen | 5 |

### 5.3. Alltägliche Tätigkeiten (z.B. Arbeit, Studium, Hausarbeit, Familien- oder Freizeitaktivitäten)

- |                                                                        |   |
|------------------------------------------------------------------------|---|
| Ich habe keine Probleme, meinen alltäglichen Tätigkeiten nachzugehen   | 1 |
| Ich habe leichte Probleme, meinen alltäglichen Tätigkeiten nachzugehen | 2 |
| Ich habe mäßige Probleme, meinen alltäglichen Tätigkeiten nachzugehen  | 3 |
| Ich habe große Probleme, meinen alltäglichen Tätigkeiten nachzugehen   | 4 |
| Ich bin nicht in der Lage, meinen alltäglichen Tätigkeiten nachzugehen | 5 |

**5.4. Schmerzen/Körperliche Beschwerden**

|                                             |   |
|---------------------------------------------|---|
| Ich habe keine Schmerzen oder Beschwerden   | 1 |
| Ich habe leichte Schmerzen oder Beschwerden | 2 |
| Ich habe mäßige Schmerzen oder Beschwerden  | 3 |
| Ich habe starke Schmerzen oder Beschwerden  | 4 |
| Ich habe extreme Schmerzen oder Beschwerden | 5 |

**5.5. Angst/Niedergeschlagenheit**

|                                             |   |
|---------------------------------------------|---|
| Ich bin nicht ängstlich oder deprimiert     | 1 |
| Ich bin ein wenig ängstlich oder deprimiert | 2 |
| Ich bin mäßig ängstlich oder deprimiert     | 3 |
| Ich bin sehr ängstlich oder deprimiert      | 4 |
| Ich bin extrem ängstlich oder deprimiert    | 5 |



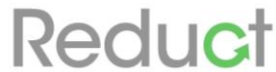

5.6. Um Sie bei der Einschätzung, wie gut oder wie schlecht Ihr Gesundheitszustand ist, zu unterstützen, haben wir eine Skala gezeichnet, ähnlich einem Thermometer. Der best denkbare Gesundheitszustand ist mit einer "100" gekennzeichnet, der schlechteste mit "0".

Wir möchten Sie nun bitten, auf dieser Skala zu kennzeichnen, wie gut oder schlecht Ihrer Ansicht nach Ihr persönlicher Gesundheitszustand heute ist. Bitte verbinden Sie dazu den untenstehenden Kasten mit dem Punkt auf der Skala, der Ihren heutigen Gesundheitszustand am besten wiedergibt.

**Ihr heutiger  
Gesundheitszustand**

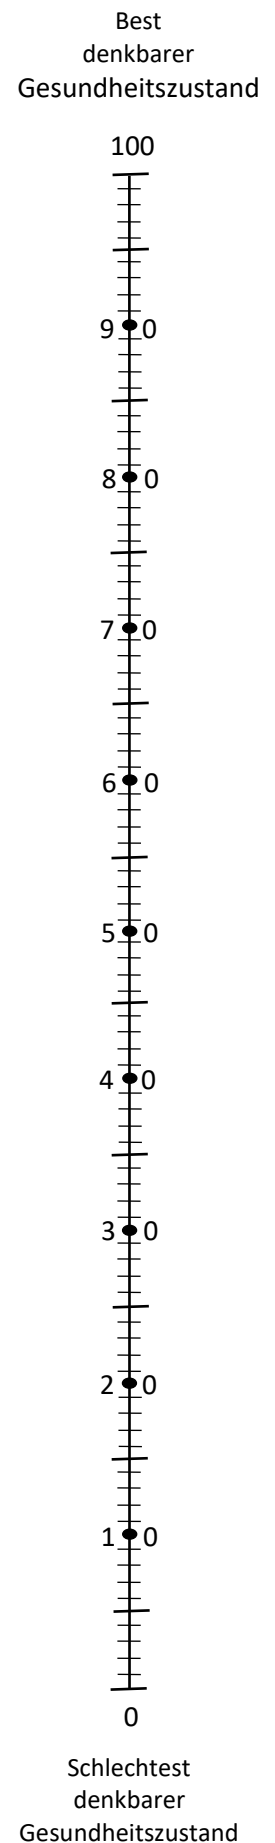

## 6. Achtsamkeit (FFA)

Dieser Fragebogen soll Ihre Achtsamkeit erfassen. Bitte beziehen Sie dabei die Aussagen auf die letzten 14 Tage. Kreuzen Sie bitte bei jeder Frage die Antwort an, die am besten auf Sie zutrifft.

|                                                                                                             | Fast<br>nie | Eher selten | Relativ<br>oft | Fast<br>immer |
|-------------------------------------------------------------------------------------------------------------|-------------|-------------|----------------|---------------|
| 6.1. Ich bin offen für die Erfahrung des Augenblicks.                                                       | 1           | 2           | 3              | 4             |
| 6.2. Ich spüre in meinen Körper hinein, sei es beim Essen, Kochen, Putzen, Reden.                           | 1           | 2           | 3              | 4             |
| 6.3. Wenn ich merke, dass ich abwesend war, kehre ich sanft zur Erfahrung des Augenblicks zurück.           | 1           | 2           | 3              | 4             |
| 6.4. Ich kann mich selbst wertschätzen.                                                                     | 1           | 2           | 3              | 4             |
| 6.5. Ich achte auf die Motive meiner Handlungen.                                                            | 1           | 2           | 3              | 4             |
| 6.6. Ich sehe meine Fehler und Schwierigkeiten, ohne mich zu verurteilen.                                   | 1           | 2           | 3              | 4             |
| 6.7. Ich bin in Kontakt mit meinen Erfahrungen, hier und jetzt.                                             | 1           | 2           | 3              | 4             |
| 6.8. Ich nehme unangenehme Erfahrungen an.                                                                  | 1           | 2           | 3              | 4             |
| 6.9. Ich bin mir selbst gegenüber freundlich, wenn Dinge schief laufen.                                     | 1           | 2           | 3              | 4             |
| 6.10. Ich beobachte meine Gefühle, ohne mich in ihnen zu verlieren.                                         | 1           | 2           | 3              | 4             |
| 6.11. In schwierigen Situationen kann ich innehalten.                                                       | 1           | 2           | 3              | 4             |
| 6.12. Ich erlebe Momente innerer Ruhe und Gelassenheit, selbst wenn äußerlich Schmerzen und Unruhe da sind. | 1           | 2           | 3              | 4             |
| 6.13. Ich bin ungeduldig mit mir und meinen Mitmenschen.                                                    | 4           | 3           | 2              | 1             |

1  
2  
3  
4  
5  
6  
7  
8  
9  
10  
11  
12  
13  
14  
15  
16  
17  
18  
19  
20  
21  
22  
23  
24  
25  
26  
27  
28  
29  
30  
31  
32  
33  
34  
35  
36  
37  
38  
39  
40  
41  
42  
43  
44  
45  
46  
47  
48  
49  
50  
51  
52  
53  
54  
55  
56  
57  
58  
59  
60

# Reduct

15

6.14. Ich kann darüber lächeln, wenn  
ich sehe, wie ich mir manchmal das  
Leben schwer mache.

1

2

3

4

For peer review only

**7. Wie oft fühlten Sie sich im Verlauf der letzten 2 Wochen durch die folgenden Beschwerden beeinträchtigt? (PHQ-4)**

|                                                                      | <b>Überhaupt nicht</b> | <b>An einzelnen Tagen</b> | <b>An mehr als der Hälfte der Tage</b> | <b>Beinahe jeden Tag</b> |
|----------------------------------------------------------------------|------------------------|---------------------------|----------------------------------------|--------------------------|
| 7.1. Wenig Interesse oder Freude an Ihren Tätigkeiten                | 0                      | 1                         | 2                                      | 3                        |
| 7.2. Niedergeschlagenheit, Schwermut oder Hoffnungslosigkeit         | 0                      | 1                         | 2                                      | 3                        |
| 7.3. Nervosität, Ängstlichkeit oder Anspannung                       | 0                      | 1                         | 2                                      | 3                        |
| 7.4. Nicht in der Lage sein, Sorgen zu stoppen oder zu kontrollieren | 0                      | 1                         | 2                                      | 3                        |

## 8. Skills

Kreuzen Sie bitte bei jeder Frage die Antwort an, die am besten auf Sie zutrifft.

|                                                                                                                      | Stimmt<br>überhaupt<br>nicht |   | Neutral |   | Stimmt<br>voll-<br>kommen |
|----------------------------------------------------------------------------------------------------------------------|------------------------------|---|---------|---|---------------------------|
| <b>8.1. In belastenden Situationen kann ich mich aufmuntern, indem ich meine Gedanken auf positive Dinge richte.</b> | 1                            | 2 | 3       | 4 | 5                         |
| <b>8.2. Meine Gedanken geben mir im Umgang mit stressigen Situationen Kraft.</b>                                     | 1                            | 2 | 3       | 4 | 5                         |
| <b>8.3. Wenn ich belastende Gefühle verspüre, lasse ich sie zu.</b>                                                  | 1                            | 2 | 3       | 4 | 5                         |
| <b>8.4. Ich kann Dinge annehmen, die ich nicht ändern kann.</b>                                                      | 1                            | 2 | 3       | 4 | 5                         |
| <b>8.5. Ich überlege mir, was ich im Umgang mit der Krebserkrankung tun kann.</b>                                    | 1                            | 2 | 3       | 4 | 5                         |
| <b>8.6. Ich führe oft bestimmte Aktivitäten aus, um auf andere Gedanken zu kommen.</b>                               | 1                            | 2 | 3       | 4 | 5                         |
| <b>8.7. Ich kann mir wohlwollend begegnen.</b>                                                                       | 1                            | 2 | 3       | 4 | 5                         |
| <b>8.8. Ich kann gut für mich sorgen.</b>                                                                            | 1                            | 2 | 3       | 4 | 5                         |
| <b>8.9. Ich suche Kontakt zu liebevollen Menschen.</b>                                                               | 1                            | 2 | 3       | 4 | 5                         |

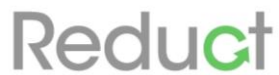

**8.10. Ich kann nach  
Unterstützung suchen.**

**1**

**2**

**3**

**4**

**5**

For peer review only

1  
2  
3  
4  
5  
6  
7  
8  
9  
10  
11  
12  
13  
14  
15  
16  
17  
18  
19  
20  
21  
22  
23  
24  
25  
26  
27  
28  
29  
30  
31  
32  
33  
34  
35  
36  
37  
38  
39  
40  
41  
42  
43  
44  
45  
46  
47  
48  
49  
50  
51  
52  
53  
54  
55  
56  
57  
58  
59  
60

### III. Technikakzeptanz nach UTAUT

1. Nun stellen wir Ihnen einige Eigenschaften digitaler Gesundheitsangebote (wie das Make It Training) vor. Bitte geben Sie für jede Eigenschaft an, wie ausschlaggebend sie dafür ist, dass Sie ein digitales Gesundheitsangebot nutzen.

|                                                                                                               | Stimmt<br>überhaupt<br>nicht | 1 | 2 | Neutral | 3 | 4 | Stimmt<br>voll-<br>kommen | 5 |
|---------------------------------------------------------------------------------------------------------------|------------------------------|---|---|---------|---|---|---------------------------|---|
| 8.1. In belastenden Situationen kann ich mich aufmuntern, indem ich meine Gedanken auf positive Dinge richte. | 1                            | 2 | 3 | 4       | 5 |   |                           |   |
| 8.2. Meine Gedanken geben mir im Umgang mit stressigen Situationen Kraft.                                     | 1                            | 2 | 3 | 4       | 5 |   |                           |   |
| 8.3. Wenn ich belastende Gefühle verspüre, lasse ich sie zu.                                                  | 1                            | 2 | 3 | 4       | 5 |   |                           |   |
| 8.4. Ich kann Dinge annehmen, die ich nicht ändern kann.                                                      | 1                            | 2 | 3 | 4       | 5 |   |                           |   |
| 8.5. Ich überlege mir, was ich im Umgang mit der Krebserkrankung tun kann.                                    | 1                            | 2 | 3 | 4       | 5 |   |                           |   |
| 8.6. Ich werde oft aktiv, um auf andere Gedanken zu kommen.                                                   | 1                            | 2 | 3 | 4       | 5 |   |                           |   |
| 8.7. Ich kann mir wohlwollend begegnen.                                                                       | 1                            | 2 | 3 | 4       | 5 |   |                           |   |
| 8.8. Ich kann gut für mich sorgen.                                                                            | 1                            | 2 | 3 | 4       | 5 |   |                           |   |
| 8.9. Ich suche Kontakt zu liebevollen Menschen.                                                               | 1                            | 2 | 3 | 4       | 5 |   |                           |   |
| 8.10. Ich kann nach Unterstützung suchen.                                                                     | 1                            | 2 | 3 | 4       | 5 |   |                           |   |



| Von einem digitalen Gesundheitsangebot erwarte ich, dass ...                                                             | <b>Stimme gar nicht zu</b> | <b>Stimme nicht zu</b> | <b>Stimme weder zu noch lehne ich ab</b> | <b>Stimme zu</b> | <b>Stimme voll und ganz zu</b> |
|--------------------------------------------------------------------------------------------------------------------------|----------------------------|------------------------|------------------------------------------|------------------|--------------------------------|
| 1.1. ich es jederzeit nutzen kann.                                                                                       | 1                          | 2                      | 3                                        | 4                | 5                              |
| 1.2. ich es auf verschiedenen Endgeräten nutzen kann (u.a. Handy, Laptop, Tablet).                                       | 1                          | 2                      | 3                                        | 4                | 5                              |
| 1.3. es einfach zu bedienen ist.                                                                                         | 1                          | 2                      | 3                                        | 4                | 5                              |
| 1.4. das Design ansprechend gestaltet und übersichtlich dargestellt ist.                                                 | 1                          | 2                      | 3                                        | 4                | 5                              |
| 1.5. das Angebot so gestaltet ist, dass es mich bei auftretenden Problemen unterstützt und ich diese alleine lösen kann. | 1                          | 2                      | 3                                        | 4                | 5                              |

2. Die Nutzung eines digitalen Gesundheitsangebots ist immer mit einem gewissen Aufwand verbunden. Bitte beantworten Sie im Folgenden, inwieweit Sie den verschiedenen Aussagen zustimmen.

| Um ein Gesundheitsangebot nutzen zu können, bin ich prinzipiell bereit, ...   | Stimme gar nicht zu | Stimme eher nicht zu | Stimme weder zu noch lehne ich ab | Stimme teilweise zu | Stimme voll und ganz zu |
|-------------------------------------------------------------------------------|---------------------|----------------------|-----------------------------------|---------------------|-------------------------|
| 2.1. zusätzliche Software auf mein Mobiltelefon/Computer/Tablet/... zu laden. | 1                   | 2                    | 3                                 | 4                   | 5                       |
| 2.2. mich regelmäßig mit den Aufgaben auseinanderzusetzen.                    | 1                   | 2                    | 3                                 | 4                   | 5                       |
| 2.3. Einheiten in die Freizeit mit einzuplanen.                               | 1                   | 2                    | 3                                 | 4                   | 5                       |

3. Bitte geben Sie an, inwieweit Sie den verschiedenen Aussagen zustimmen.

| Meiner Meinung nach, ...                                                                                                               | Stimme gar nicht zu | Stimme eher nicht zu | Stimme weder zu noch lehne ich ab | Stimme teilweise zu | Stimme voll und ganz zu |
|----------------------------------------------------------------------------------------------------------------------------------------|---------------------|----------------------|-----------------------------------|---------------------|-------------------------|
| 3.1. kann die Nutzung eines digitalen Gesundheitsangebots <u>negative</u> Auswirkungen auf die Meinung meines Umfelds über mich haben. | 1                   | 2                    | 3                                 | 4                   | 5                       |
| 3.2. benötigt die Nutzung eines digitalen Gesundheitsangebots viel Zeit.                                                               | 1                   | 2                    | 3                                 | 4                   | 5                       |

3.3. besteht das Risiko, dass die persönliche Interaktion zwischen der Ärztin/ dem Arzt und der Patientin/dem Patienten schwindet.

|   |   |   |   |   |
|---|---|---|---|---|
| 1 | 2 | 3 | 4 | 5 |
|---|---|---|---|---|

3.4. besteht das Risiko, dass ich mich während der Nutzung des digitalen Gesundheitsangebots "allein" gelassen fühle.

|   |   |   |   |   |
|---|---|---|---|---|
| 1 | 2 | 3 | 4 | 5 |
|---|---|---|---|---|

**4. Informationen über digitale Gesundheitsangebote können über persönliche Kontakte oder auch Medien verbreitet werden. Bitte geben Sie an, inwieweit Sie den folgenden Aussagen zustimmen.**

|                                                                                                                                                                                           | Stimme<br>gar nicht<br>zu | Stimme<br>eher nicht<br>zu | Stimme<br>weder zu<br>noch<br>lehne ich<br>ab | Stimme<br>teilweise<br>zu | Stimme<br>voll und<br>ganz zu |
|-------------------------------------------------------------------------------------------------------------------------------------------------------------------------------------------|---------------------------|----------------------------|-----------------------------------------------|---------------------------|-------------------------------|
| 4.1. In den Medien sind Beiträge zu finden, die positiv über digitale Gesundheitsangebote zur Unterstützung im Umgang mit krankheitsbezogenen Belastungen berichten.                      | 1                         | 2                          | 3                                             | 4                         | 5                             |
| 4.2. Die Mehrheit meiner Freunde und Arbeitskollegen beurteilen die Verwendung digitaler Gesundheitsangebote zur Unterstützung im Umgang mit krankheitsbezogenen Belastungen als positiv. | 1                         | 2                          | 3                                             | 4                         | 5                             |

4.3. Personen, die mir wichtig sind, halten es für eine gute Idee, ein digitales Gesundheitsangebot zur Unterstützung im Umgang mit krankheitsbezogenen Belastungen zu nutzen.

|   |   |   |   |   |
|---|---|---|---|---|
| 1 | 2 | 3 | 4 | 5 |
|---|---|---|---|---|

4.4. Einige meiner Freunde/Bekanntes haben mir empfohlen, ein digitales Gesundheitsangebot zur Unterstützung im Umgang mit krankheitsbezogenen Belastungen auszuprobieren.

|   |   |   |   |   |
|---|---|---|---|---|
| 1 | 2 | 3 | 4 | 5 |
|---|---|---|---|---|

## V. Nutzung von Technologien

1. Wie häufig nutzen Sie die folgenden Technologien privat?

|                    | nie/besitze<br>ich nicht | eher<br>weniger (als<br>1x/Woche) | mäßig<br>(mehr als<br>1x/Woche) | oft (täglich) | Sehr oft<br>(mehrmals<br>täglich) |
|--------------------|--------------------------|-----------------------------------|---------------------------------|---------------|-----------------------------------|
| <u>PC/Laptop:</u>  | 1                        | 2                                 | 3                               | 4             | 5                                 |
| <u>Tablet:</u>     | 1                        | 2                                 | 3                               | 4             | 5                                 |
| <u>Smartphone:</u> | 1                        | 2                                 | 3                               | 4             | 5                                 |

2. Bitte geben Sie an, wie lange am Tag Sie ca. digitale Medien (wie digitales Fernsehen, eBooks, Computer, Smartphone) nutzen.

- 0-1 Stunde   
  1-2 Stunden   
  2-3 Stunden   
  3-4 Stunden   
  Mehr als 4 Stunden

3. Bitte geben Sie im Folgenden an, inwieweit Sie den verschiedenen Aussagen zustimmen.

|                                                        | Stimme gar<br>nicht zu | Stimme nicht<br>zu | Stimme weder zu<br>noch lehne<br>ich ab | Stimme zu | Stimme voll<br>und ganz zu |
|--------------------------------------------------------|------------------------|--------------------|-----------------------------------------|-----------|----------------------------|
| 5.3.1. Ich kann gut mit digitalen Medien umgehen.      | 1                      | 2                  | 3                                       | 4         | 5                          |
| 5.3.2. Ich bin offen für verschiedene digitale Medien. | 1                      | 2                  | 3                                       | 4         | 5                          |

1  
2  
3  
4  
5  
6  
7  
8  
9  
10  
11  
12  
13  
14  
15  
16  
17  
18  
19  
20  
21  
22  
23  
24  
25  
26  
27  
28  
29  
30  
31  
32  
33  
34  
35  
36  
37  
38  
39  
40  
41  
42  
43  
44  
45  
46  
47  
48  
49  
50  
51  
52  
53  
54  
55  
56  
57  
58  
59  
60

5.3.3. Ich habe  
Erfahrung mit  
digitalen  
Gesundheitsa  
ngeboten im  
Umgang mit  
krankheitsbez  
ogenen  
Belastungen.

1                      2                      3                      4                      5

For peer review only

**VI. Inwieweit sind die folgenden Themen für den Umgang mit Ihrer Krebserkrankung für Sie wichtig?**

|                                | Überhaupt<br>nicht wichtig | Wenig<br>wichtig         | Mäßig<br>wichtig         | Eher<br>wichtig          | Sehr wichtig             |
|--------------------------------|----------------------------|--------------------------|--------------------------|--------------------------|--------------------------|
| Gesundheitsbezogenes Verhalten | 1                          | 2                        | 3                        | 4                        | 5                        |
| Gefühle                        | 1                          | 2                        | 3                        | 4                        | 5                        |
| Kreativität                    | 1                          | 2                        | 3                        | 4                        | 5                        |
| Schmerzerleben                 | 1                          | 2                        | 3                        | 4                        | 5                        |
| Angst                          | 1                          | 2                        | 3                        | 4                        | 5                        |
| Kraftquellen                   | 1                          | 2                        | 3                        | 4                        | 5                        |
| Positivität                    | 1                          | 2                        | 3                        | 4                        | 5                        |
| Körpergefühl                   | 1                          | 2                        | 3                        | 4                        | 5                        |
| Bewegung und Entspannung       | 1                          | 2                        | 3                        | 4                        | 5                        |
| Stressmanagement               | <input type="checkbox"/>   | <input type="checkbox"/> | <input type="checkbox"/> | <input type="checkbox"/> | <input type="checkbox"/> |
| Schlaf                         | <input type="checkbox"/>   | <input type="checkbox"/> | <input type="checkbox"/> | <input type="checkbox"/> | <input type="checkbox"/> |
| Selbstzuwendung                | <input type="checkbox"/>   | <input type="checkbox"/> | <input type="checkbox"/> | <input type="checkbox"/> | <input type="checkbox"/> |
| Beziehungen                    | <input type="checkbox"/>   | <input type="checkbox"/> | <input type="checkbox"/> | <input type="checkbox"/> | <input type="checkbox"/> |



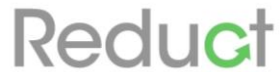

27

Liebe Teilnehmerin, lieber Teilnehmer,

Vielen Dank für Ihre Teilnahme an der ersten Befragung der Reduct Studie. Für die nächsten Schritte wird sich das Reduct Team in den nächsten Tagen bei Ihnen melden.

Sollten Sie Fragen haben, können Sie gerne jederzeit eine E-Mail an [reduct@uni-due.de](mailto:reduct@uni-due.de) senden.

Wir wünschen Ihnen alles Gute!

Ihr Reduct Team

For peer review only

Teilnehmer-ID: \_\_\_\_\_

# Reduct- Web-Basierte Achtsamkeits- und Skillsbasierte Stressreduktion für Patientinnen und Patienten mit Krebs

Liebe Teilnehmerin, lieber Teilnehmer,

wir haben beobachtet, dass Sie unsere Reduct-Web-App nicht weitergenutzt haben. Wir hoffen, dass sich Ihr Gesundheitszustand nicht verschlechtert hat und nicht ausschlaggebend für den Abbruch des Trainings ist.

Wir bedanken uns bei Ihnen, dass Sie unserer Reduct-Web-App eine Chance gegeben haben und dass Sie nun einen letzten Fragebogen ausfüllen. Sie helfen uns mit Ihrer Meinung sehr und tragen zur Weiterentwicklung und Verbesserung von unserer Reduct-Web-App bei.

Für uns ist es in diesem Fragebogen in erster Linie wichtig zu erfahren, warum Sie sich entschlossen haben, das Training nicht fortzuführen. Ihre Ehrlichkeit und Offenheit wird uns sehr weiterhelfen und einen Beitrag leisten zur Verbesserung zukünftiger psychoonkologischer Versorgungsangebote.

Sollten Sie Fragen haben, können Sie gerne jederzeit eine E-Mail an [reduct@uni-due.de](mailto:reduct@uni-due.de) senden.

Wenn Sie merken, dass Sie sich sehr belastet fühlen und Sie Unterstützung bei der Bewältigung Ihrer Erkrankung benötigen, können Sie sich jederzeit an die/den Studienverantwortliche/n Ihres Zentrums wenden. Diese/r kann Ihnen bei der Suche psychoonkologischer Hilfsangebote zur Seite stehen.

Herzlichen Dank und alles Gute,

Ihr Reduct Team

*[Hier Kontaktdaten im eCRF einfügen](#)*

## I. Fragen zu Ihrem derzeitigen Befinden

### 1. Angst und Stresserleben

Bitte beantworten Sie im Folgenden, wie sehr die jeweilige Aussage in der letzten Woche auf Sie zutraf.

- |                                                                                           |                                                                     |
|-------------------------------------------------------------------------------------------|---------------------------------------------------------------------|
| 1.1. Ich fühle mich angespannt oder überreizt.                                            | 1.2. Ich fühle mich in meinen Aktivitäten gebremst.                 |
| 3 meistens                                                                                | 3 fast immer                                                        |
| 2 oft                                                                                     | 2 sehr oft                                                          |
| 1 von Zeit zu Zeit/ gelegentlich                                                          | 1 manchmal                                                          |
| 0 überhaupt nicht                                                                         | 0 überhaupt nicht                                                   |
| 1.3. Ich kann mich heute noch so freuen wie früher.                                       | 1.4. Ich habe manchmal ein ängstliches Gefühl in der Magengegend.   |
| 0 ganz genau so                                                                           | 0 überhaupt nicht                                                   |
| 1 nicht ganz so sehr                                                                      | 1 gelegentlich                                                      |
| 2 Nur noch ein wenig                                                                      | 2 ziemlich oft                                                      |
| 3 kaum oder gar nicht                                                                     | 3 sehr oft                                                          |
| 1.5. Mich überkommt eine ängstliche Vorahnung, dass etwas Schreckliches passieren könnte. | 1.6. Ich habe das Interesse an meiner äußeren Erscheinung verloren. |
| 3 ja, sehr stark                                                                          | 3 ja, stimmt genau                                                  |
| 2 ja, aber nicht allzu stark                                                              | 2 ich kümmere mich nicht so sehr darum, wie ich sollte              |
| 1 etwas, aber es macht mir keine Sorgen                                                   | 1 möglicherweise kümmere ich mich zu wenig darum                    |
| 0 überhaupt nicht                                                                         | 0 ich kümmere mich so viel darum wie immer                          |
| 1.7. Ich kann lachen und die lustige Seite der Dinge sehen.                               | 1.8. Ich fühle mich rastlos, muss immer in Bewegung sein.           |
| 0 ja, so viel wie immer                                                                   | 3 ja, tatsächlich sehr                                              |
| 1 nicht mehr ganz so viel                                                                 | 2 ziemlich                                                          |
| 2 inzwischen viel weniger                                                                 | 1 nicht sehr                                                        |
| 3 überhaupt nicht                                                                         | 0 überhaupt nicht                                                   |

1.9. Mir gehen beunruhigende Gedanken durch den Kopf.

- 3 einen Großteil der Zeit  
 2 verhältnismäßig oft  
 1 von Zeit zu Zeit, aber nicht allzu oft  
 0 nur gelegentlich/nie

1.10. Ich blicke mit Freude in die Zukunft.

- 0 ja, sehr  
 1 eher weniger als früher  
 2 viel weniger als früher  
 3 kaum bis gar nicht

1.11. Ich fühle mich glücklich.

- 3 überhaupt nicht  
 2 selten  
 1 manchmal  
 0 meistens

1.12. Mich überkommt plötzlich ein panikartiger Zustand.

- 3 ja, tatsächlich sehr oft  
 2 ziemlich oft  
 1 nicht sehr oft  
 0 überhaupt nicht

1.13. Ich kann behaglich dasitzen und mich entspannen.

- 0 ja, natürlich  
 1 gewöhnlich schon  
 2 nicht oft  
 3 überhaupt nicht

1.14. Ich kann mich an einem guten Buch, einer Radio- oder Fernsehsendung erfreuen.

- 0 oft  
 1 manchmal  
 2 Eher selten  
 3 Sehr selten

## 2. Belastungsthermometer

Bitte markieren Sie am Thermometer die Zahl, die am besten beschreibt, wie belastet Sie sich in der letzten Woche einschließlich heute gefühlt haben.

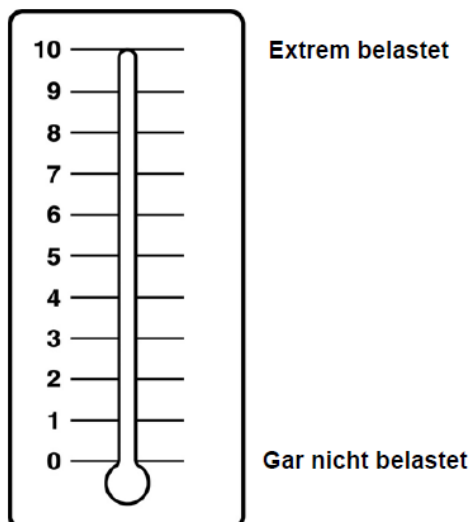

### 3. Skala zur Allgemeinen Selbstwirksamkeitserwartung

Kreuzen Sie bitte bei jeder Frage die Antwort an, die am besten auf Sie zutrifft.

- |                                                                                           |                                                                     |
|-------------------------------------------------------------------------------------------|---------------------------------------------------------------------|
| 1.1. Ich fühle mich angespannt oder überreizt.                                            | 1.2. Ich fühle mich in meinen Aktivitäten gebremst.                 |
| 3 meistens                                                                                | 3 fast immer                                                        |
| 2 oft                                                                                     | 2 sehr oft                                                          |
| 1 von Zeit zu Zeit/ gelegentlich                                                          | 1 manchmal                                                          |
| 0 überhaupt nicht                                                                         | 0 überhaupt nicht                                                   |
| 1.3. Ich kann mich heute noch so freuen wie früher.                                       | 1.4. Ich habe manchmal ein ängstliches Gefühl in der Magengegend.   |
| 0 ganz genau so                                                                           | 0 überhaupt nicht                                                   |
| 1 nicht ganz so sehr                                                                      | 1 gelegentlich                                                      |
| 2 Nur noch ein wenig                                                                      | 2 ziemlich oft                                                      |
| 3 kaum oder gar nicht                                                                     | 3 sehr oft                                                          |
| 1.5. Mich überkommt eine ängstliche Vorahnung, dass etwas Schreckliches passieren könnte. | 1.6. Ich habe das Interesse an meiner äußeren Erscheinung verloren. |
| 3 ja, sehr stark                                                                          | 3 ja, stimmt genau                                                  |
| 2 ja, aber nicht allzu stark                                                              | 2 ich kümmere mich nicht so sehr darum, wie ich sollte              |
| 1 etwas, aber es macht mir keine Sorgen                                                   | 1 möglicherweise kümmere ich mich zu wenig darum                    |
| 0 überhaupt nicht                                                                         | 0 ich kümmere mich so viel darum wie immer                          |
| 1.7. Ich kann lachen und die lustige Seite der Dinge sehen.                               | 1.8. Ich fühle mich rastlos, muss immer in Bewegung sein.           |
| 0 ja, so viel wie immer                                                                   | 3 ja, tatsächlich sehr                                              |
| 1 nicht mehr ganz so viel                                                                 | 2 ziemlich                                                          |
| 2 inzwischen viel weniger                                                                 | 1 nicht sehr                                                        |
| 3 überhaupt nicht                                                                         | 0 überhaupt nicht                                                   |

1  
2  
3  
4  
5  
6  
7  
8  
9  
10  
11  
12  
13  
14  
15  
16  
17  
18  
19  
20  
21  
22  
23  
24  
25  
26  
27  
28  
29  
30  
31  
32  
33  
34  
35  
36  
37  
38  
39  
40  
41  
42  
43  
44  
45  
46  
47  
48  
49  
50  
51  
52  
53  
54  
55  
56  
57  
58  
59  
60

1.9. Mir gehen beunruhigende Gedanken durch den Kopf.

- 3 einen Großteil der Zeit
- 2 verhältnismäßig oft
- 1 von Zeit zu Zeit, aber nicht allzu oft
- 0 nur gelegentlich/nie

1.11. Ich fühle mich glücklich.

- 3 überhaupt nicht
- 2 selten
- 1 manchmal
- 0 meistens

1.13. Ich kann behaglich dasitzen und mich entspannen.

- 0 ja, natürlich
- 1 gewöhnlich schon
- 2 nicht oft
- 3 überhaupt nicht

1.10. Ich blicke mit Freude in die Zukunft.

- 0 ja, sehr
- 1 eher weniger als früher
- 2 viel weniger als früher
- 3 kaum bis gar nicht

1.12. Mich überkommt plötzlich ein panikartiger Zustand.

- 3 ja, tatsächlich sehr oft
- 2 ziemlich oft
- 1 nicht sehr oft
- 0 überhaupt nicht

1.14. Ich kann mich an einem guten Buch, einer Radio- oder Fernsehsendung erfreuen.

- 0 oft
- 1 manchmal
- 2 Eher selten
- 3 Sehr selten

#### 4. Lebensqualität (EORT-QLQ-C30)

Bitte kreuzen Sie im Folgenden Abschnitt die Zahl von 1 bis 4 an, die am besten auf Sie zutrifft.

|                                                                                                                                      | Überhaupt<br>nicht | Wenig | Mäßig | Sehr |
|--------------------------------------------------------------------------------------------------------------------------------------|--------------------|-------|-------|------|
| 4.1. Bereitet es Ihnen Schwierigkeiten, sich körperlich anzustrengen (z.B. eine schwere Einkaufstasche oder einen Koffer zu tragen)? | 1                  | 2     | 3     | 4    |
| 4.2. Bereitet es Ihnen Schwierigkeiten, einen <u>längeren</u> Spaziergang zu machen?                                                 | 1                  | 2     | 3     | 4    |
| 4.3. Bereitet es Ihnen Schwierigkeiten, eine <u>kurze</u> Strecke außer Haus zu gehen?                                               | 1                  | 2     | 3     | 4    |
| 4.4. Müssen Sie tagsüber im Bett liegen oder in einem Sessel sitzen?                                                                 | 1                  | 2     | 3     | 4    |
| 4.5. Brauchen Sie Hilfe beim Essen, Anziehen, Waschen oder Benutzen der Toilette?                                                    | 1                  | 2     | 3     | 4    |
| <b>Während der letzten Woche:</b>                                                                                                    |                    |       |       |      |
|                                                                                                                                      | Überhaupt<br>nicht | Wenig | Mäßig | Sehr |
| 4.6. Waren Sie bei Ihrer Arbeit oder bei anderen tagtäglichen Beschäftigungen eingeschränkt?                                         | 1                  | 2     | 3     | 4    |
| 4.7. Waren Sie bei Ihren Hobbys oder andere Freizeitbeschäftigungen eingeschränkt?                                                   | 1                  | 2     | 3     | 4    |
| 4.8. Waren Sie kurzatmig?                                                                                                            | 1                  | 2     | 3     | 4    |
| 4.9. Hatten Sie Schmerzen?                                                                                                           | 1                  | 2     | 3     | 4    |
| 4.10. Mussten Sie sich ausruhen?                                                                                                     | 1                  | 2     | 3     | 4    |
| 4.11. Hatten Sie Schlafstörungen?                                                                                                    | 1                  | 2     | 3     | 4    |

4.12. Fühlten Sie sich schwach?

1 2 3 4

**Während der letzten Woche:**

**Überhaupt  
nicht**

**Wenig**

**Mäßig**

**Sehr**

4.13. Hatten Sie Appetitmangel?

1 2 3 4

4.14. War Ihnen übel?

1 2 3 4

4.15. Haben Sie erbrochen?

1 2 3 4

4.16. Hatten Sie Verstopfung?

1 2 3 4

4.17. Hatten Sie Durchfall?

1 2 3 4

4.18. Waren Sie müde?

1 2 3 4

4.19. Fühlten Sie sich durch  
Schmerzen in Ihrem alltäglichen  
Leben beeinträchtigt?

1 2 3 4

4.20. Hatten Sie Schwierigkeiten, sich  
auf etwas zu konzentrieren, z.B. auf  
das Zeitungslesen oder das  
Fernsehen?

1 2 3 4

4.21. Fühlten Sie sich angespannt?

1 2 3 4

4.22. Haben Sie sich Sorgen  
gemacht?

1 2 3 4

4.23. Waren Sie reizbar?

1 2 3 4

4.24. Fühlten Sie sich  
niedergeschlagen?

1 2 3 4

4.25. Hatten Sie Schwierigkeiten, sich  
an Dinge zu erinnern?

1 2 3 4

4.26. Hat Ihr körperlicher Zustand  
oder Ihre medizinische Behandlung  
Ihr Familienleben beeinträchtigt?

1 2 3 4



1  
2  
3 4.27. Hat Ihr körperlicher Zustand 1 2 3 4  
4 oder Ihre medizinische Behandlung  
5 Ihr Zusammensein oder Ihre  
6 gemeinsamen Unternehmungen mit  
7 anderen Menschen beeinträchtigt?  
8

9  
10  
11 4.28. Hat Ihr körperlicher Zustand 1 2 3 4  
12 oder Ihre medizinische Behandlung  
13 für Sie finanzielle Schwierigkeiten mit  
14 sich gebracht?  
15  
16

17  
18  
19  
20  
21 **Bitte kreuzen Sie bei den folgenden Fragen die Zahl zwischen 1 und 7 an, die am besten auf Sie**  
22 **zutrifft.**

23  
24 4.29. Wie würden Sie insgesamt Ihren Gesundheitszustand während der letzten Woche  
25 einschätzen?

26  
27 1 2 3 4 5 6 7  
28  
29 sehr ausgezeichnet  
30 schlecht

31  
32 4.30. Wie würden Sie insgesamt Ihre Lebensqualität während der letzten Woche einschätzen?  
33

34 1 2 3 4 5 6 7  
35  
36 sehr ausgezeichnet  
37 schlecht  
38  
39  
40  
41  
42  
43  
44  
45  
46  
47  
48  
49  
50  
51  
52  
53  
54  
55  
56  
57  
58  
59  
60

## 5. Lebensqualität (EQ-5D-5L)

Bitte kreuzen Sie unter jeder Überschrift das Kästchen an, das Ihren Gesundheitszustand heute am besten beschreibt.

### 5.1. Beweglichkeit/Mobilität

- |                                         |   |
|-----------------------------------------|---|
| Ich habe keine Probleme herumzugehen    | 1 |
| Ich habe leichte Probleme herumzugehen  | 2 |
| Ich habe mäßige Probleme herumzugehen   | 3 |
| Ich habe große Probleme herumzugehen    | 4 |
| Ich bin nicht in der Lage, herumzugehen | 5 |

### 5.2. Für sich selbst sorgen

- |                                                                   |   |
|-------------------------------------------------------------------|---|
| Ich habe keine Probleme, mich selbst zu waschen oder anzuziehen   | 1 |
| Ich habe leichte Probleme, mich selbst zu waschen oder anzuziehen | 2 |
| Ich habe mäßige Probleme, mich selbst zu waschen oder anzuziehen  | 3 |
| Ich habe große Probleme, mich selbst zu waschen oder anzuziehen   | 4 |
| Ich bin nicht in der Lage, mich selbst zu waschen oder anzuziehen | 5 |

### 5.3. Alltägliche Tätigkeiten (z.B. Arbeit, Studium, Hausarbeit, Familien- oder Freizeitaktivitäten)

- |                                                                        |   |
|------------------------------------------------------------------------|---|
| Ich habe keine Probleme, meinen alltäglichen Tätigkeiten nachzugehen   | 1 |
| Ich habe leichte Probleme, meinen alltäglichen Tätigkeiten nachzugehen | 2 |
| Ich habe mäßige Probleme, meinen alltäglichen Tätigkeiten nachzugehen  | 3 |
| Ich habe große Probleme, meinen alltäglichen Tätigkeiten nachzugehen   | 4 |
| Ich bin nicht in der Lage, meinen alltäglichen Tätigkeiten nachzugehen | 5 |

**5.4. Schmerzen/Körperliche Beschwerden**

|    |                                             |   |
|----|---------------------------------------------|---|
| 1  |                                             |   |
| 2  |                                             |   |
| 3  |                                             |   |
| 4  |                                             |   |
| 5  | Ich habe keine Schmerzen oder Beschwerden   | 1 |
| 6  |                                             |   |
| 7  |                                             |   |
| 8  | Ich habe leichte Schmerzen oder Beschwerden | 2 |
| 9  |                                             |   |
| 10 | Ich habe mäßige Schmerzen oder Beschwerden  | 3 |
| 11 |                                             |   |
| 12 | Ich habe starke Schmerzen oder Beschwerden  | 4 |
| 13 |                                             |   |
| 14 |                                             |   |
| 15 | Ich habe extreme Schmerzen oder Beschwerden | 5 |
| 16 |                                             |   |
| 17 |                                             |   |

**5.5. Angst/Niedergeschlagenheit**

|    |                                             |   |
|----|---------------------------------------------|---|
| 18 |                                             |   |
| 19 |                                             |   |
| 20 | Ich bin nicht ängstlich oder deprimiert     | 1 |
| 21 |                                             |   |
| 22 | Ich bin ein wenig ängstlich oder deprimiert | 2 |
| 23 |                                             |   |
| 24 | Ich bin mäßig ängstlich oder deprimiert     | 3 |
| 25 |                                             |   |
| 26 | Ich bin sehr ängstlich oder deprimiert      | 4 |
| 27 |                                             |   |
| 28 | Ich bin extrem ängstlich oder deprimiert    | 5 |
| 29 |                                             |   |
| 30 |                                             |   |
| 31 |                                             |   |
| 32 |                                             |   |
| 33 |                                             |   |
| 34 |                                             |   |
| 35 |                                             |   |
| 36 |                                             |   |
| 37 |                                             |   |
| 38 |                                             |   |
| 39 |                                             |   |
| 40 |                                             |   |
| 41 |                                             |   |
| 42 |                                             |   |
| 43 |                                             |   |
| 44 |                                             |   |
| 45 |                                             |   |
| 46 |                                             |   |
| 47 |                                             |   |
| 48 |                                             |   |
| 49 |                                             |   |
| 50 |                                             |   |
| 51 |                                             |   |
| 52 |                                             |   |
| 53 |                                             |   |
| 54 |                                             |   |
| 55 |                                             |   |
| 56 |                                             |   |
| 57 |                                             |   |
| 58 |                                             |   |
| 59 |                                             |   |
| 60 |                                             |   |

5.6. Um Sie bei der Einschätzung, wie gut oder wie schlecht Ihr Gesundheitszustand ist, zu unterstützen, haben wir eine Skala gezeichnet, ähnlich einem Thermometer. Der best denkbare Gesundheitszustand ist mit einer "100" gekennzeichnet, der schlechteste mit "0".

Wir möchten Sie nun bitten, auf dieser Skala zu kennzeichnen, wie gut oder schlecht Ihrer Ansicht nach Ihr persönlicher Gesundheitszustand heute ist. Bitte verbinden Sie dazu den untenstehenden Kasten mit dem Punkt auf der Skala, der Ihren heutigen Gesundheitszustand am besten wiedergibt.

**Ihr heutiger  
Gesundheitszustand**

Best  
denkbarer  
Gesundheitszustand

100

90

80

70

60

50

40

30

20

10

0

Schlechtest  
denkbarer  
Gesundheitszustand

## 6. Achtsamkeit (FFA)

Dieser Fragebogen soll Ihre Achtsamkeit erfassen. Bitte beziehen Sie dabei die Aussagen auf die letzten 14 Tage. Kreuzen Sie bitte bei jeder Frage die Antwort an, die am besten auf Sie zutrifft.

For peer review only

**7. Wie oft fühlten Sie sich im Verlauf der letzten 2 Wochen durch die folgenden Beschwerden beeinträchtigt? (PHQ-4)**

|                                                                                                             | <b>Fast nie</b> | <b>Eher selten</b> | <b>Relativ oft</b> | <b>Fast immer</b> |
|-------------------------------------------------------------------------------------------------------------|-----------------|--------------------|--------------------|-------------------|
| 6.1. Ich bin offen für die Erfahrung des Augenblicks.                                                       | 1               | 2                  | 3                  | 4                 |
| 6.2. Ich spüre in meinen Körper hinein, sei es beim Essen, Kochen, Putzen, Reden.                           | 1               | 2                  | 3                  | 4                 |
| 6.3. Wenn ich merke, dass ich abwesend war, kehre ich sanft zur Erfahrung des Augenblicks zurück.           | 1               | 2                  | 3                  | 4                 |
| 6.4. Ich kann mich selbst wertschätzen.                                                                     | 1               | 2                  | 3                  | 4                 |
| 6.5. Ich achte auf die Motive meiner Handlungen.                                                            | 1               | 2                  | 3                  | 4                 |
| 6.6. Ich sehe meine Fehler und Schwierigkeiten, ohne mich zu verurteilen.                                   | 1               | 2                  | 3                  | 4                 |
| 6.7. Ich bin in Kontakt mit meinen Erfahrungen, hier und jetzt.                                             | 1               | 2                  | 3                  | 4                 |
| 6.8. Ich nehme unangenehme Erfahrungen an.                                                                  | 1               | 2                  | 3                  | 4                 |
| 6.9. Ich bin mir selbst gegenüber freundlich, wenn Dinge schief laufen.                                     | 1               | 2                  | 3                  | 4                 |
| 6.10. Ich beobachte meine Gefühle, ohne mich in ihnen zu verlieren.                                         | 1               | 2                  | 3                  | 4                 |
| 6.11. In schwierigen Situationen kann ich innehalten.                                                       | 1               | 2                  | 3                  | 4                 |
| 6.12. Ich erlebe Momente innerer Ruhe und Gelassenheit, selbst wenn äußerlich Schmerzen und Unruhe da sind. | 1               | 2                  | 3                  | 4                 |
| 6.13. Ich bin ungeduldig mit mir und meinen Mitmenschen.                                                    | 4               | 3                  | 2                  | 1                 |
| 6.14. Ich kann darüber lächeln, wenn ich sehe, wie ich mir manchmal das Leben schwer mache.                 | 1               | 2                  | 3                  | 4                 |

|                                                                      | Überhaupt<br>nicht | An einzelnen<br>Tagen | An mehr als<br>der Hälfte der<br>Tage | Beinahe<br>jeden Tag |
|----------------------------------------------------------------------|--------------------|-----------------------|---------------------------------------|----------------------|
| 7.1. Wenig Interesse oder Freude an Ihren Tätigkeiten                | 0                  | 1                     | 2                                     | 3                    |
| 7.2. Niedergeschlagenheit, Schwermut oder Hoffnungslosigkeit         | 0                  | 1                     | 2                                     | 3                    |
| 7.3. Nervosität, Ängstlichkeit oder Anspannung                       | 0                  | 1                     | 2                                     | 3                    |
| 7.4. Nicht in der Lage sein, Sorgen zu stoppen oder zu kontrollieren | 0                  | 1                     | 2                                     | 3                    |

## 8. Skills

Kreuzen Sie bitte bei jeder Frage die Antwort an, die am besten auf Sie zutrifft.

## II. Fragen zur Reduct-Web-App

1. Bitte geben Sie an, aus welchem Grund Sie die Nutzung der Reduct-Web-App nicht fortgeführt haben. Hiermit helfen Sie dabei, unsere Web-App zu verbessern und weiter zu entwickeln.

|                                                                                                               | Stimmt<br>überhaupt<br>nicht | 1 | 2 | Neutral | 3 | 4 | Stimmt<br>voll-<br>kommen | 5 |
|---------------------------------------------------------------------------------------------------------------|------------------------------|---|---|---------|---|---|---------------------------|---|
| 8.1. In belastenden Situationen kann ich mich aufmuntern, indem ich meine Gedanken auf positive Dinge richte. | 1                            | 2 | 3 | 4       | 5 |   |                           |   |
| 8.2. Meine Gedanken geben mir im Umgang mit stressigen Situationen Kraft.                                     | 1                            | 2 | 3 | 4       | 5 |   |                           |   |
| 8.3. Wenn ich belastende Gefühle verspüre, lasse ich sie zu.                                                  | 1                            | 2 | 3 | 4       | 5 |   |                           |   |
| 8.4. Ich kann Dinge annehmen, die ich nicht ändern kann.                                                      | 1                            | 2 | 3 | 4       | 5 |   |                           |   |
| 8.5. Ich überlege mir, was ich im Umgang mit der Krebserkrankung tun kann.                                    | 1                            | 2 | 3 | 4       | 5 |   |                           |   |
| 8.6. Ich führe oft bestimmte Aktivitäten aus, um auf andere Gedanken zu kommen.                               | 1                            | 2 | 3 | 4       | 5 |   |                           |   |
| 8.7. Ich kann mir wohlwollend begegnen.                                                                       | 1                            | 2 | 3 | 4       | 5 |   |                           |   |
| 8.8. Ich kann gut für mich sorgen.                                                                            | 1                            | 2 | 3 | 4       | 5 |   |                           |   |
| 8.9. Ich suche Kontakt zu liebevollen Menschen.                                                               | 1                            | 2 | 3 | 4       | 5 |   |                           |   |
| 8.10. Ich kann nach Unterstützung suchen.                                                                     | 1                            | 2 | 3 | 4       | 5 |   |                           |   |



- Verschlechterung meines psychischen Zustandes
- Verschlechterung meines körperlichen Zustandes
- Ich habe das Training nicht als hilfreich erlebt
- Technische Probleme
- Zeitmangel
- Fehlendes Interesse
- Fehlende Motivation
- Anderer Grund: \_\_\_\_\_
- \_\_\_\_\_

**2. Patientenzufriedenheit (CSQ-1 adapted to Internet-based interventions)**

**Nun folgen Fragen dazu, wie zufrieden Sie mit dem Training/ der Reduct-Web-App waren.**

|                                                                                                                                  | Trifft<br>nicht zu       | Trifft<br>eher<br>nicht zu | Trifft<br>teilweise<br>zu | Trifft voll<br>und ganz<br>zu |
|----------------------------------------------------------------------------------------------------------------------------------|--------------------------|----------------------------|---------------------------|-------------------------------|
| 2.1. Das Training, an dem ich teilgenommen habe, hatte eine hohe Qualität                                                        | <input type="checkbox"/> | <input type="checkbox"/>   | <input type="checkbox"/>  | <input type="checkbox"/>      |
|                                                                                                                                  | 1                        | 2                          | 3                         | 4                             |
| 2.2. Ich habe die Art von Training erhalten, die ich wollte.                                                                     | <input type="checkbox"/> | <input type="checkbox"/>   | <input type="checkbox"/>  | <input type="checkbox"/>      |
|                                                                                                                                  | 1                        | 2                          | 3                         | 4                             |
| 2.3. Das Training hat meinen Bedürfnissen entsprochen.                                                                           | <input type="checkbox"/> | <input type="checkbox"/>   | <input type="checkbox"/>  | <input type="checkbox"/>      |
|                                                                                                                                  | 1                        | 2                          | 3                         | 4                             |
| 2.4. Ich würde einem Freund oder einer Freundin dieses Training empfehlen, wenn er oder sie eine ähnliche Hilfe benötigen würde. | <input type="checkbox"/> | <input type="checkbox"/>   | <input type="checkbox"/>  | <input type="checkbox"/>      |
|                                                                                                                                  | 1                        | 2                          | 3                         | 4                             |
| 2.5. Ich bin zufrieden mit dem Ausmaß der Hilfe, die ich durch das Training erhalten habe.                                       | <input type="checkbox"/> | <input type="checkbox"/>   | <input type="checkbox"/>  | <input type="checkbox"/>      |
|                                                                                                                                  | 1                        | 2                          | 3                         | 4                             |

2.6. Das Training hat mir dabei geholfen, angemessener mit meinen Problemen umzugehen.

|                          |                          |                          |                          |
|--------------------------|--------------------------|--------------------------|--------------------------|
| <input type="checkbox"/> | <input type="checkbox"/> | <input type="checkbox"/> | <input type="checkbox"/> |
| 1                        | 2                        | 3                        | 4                        |

2.7. Im Großen und Ganzen bin ich mit dem Training zufrieden.

|                          |                          |                          |                          |
|--------------------------|--------------------------|--------------------------|--------------------------|
| <input type="checkbox"/> | <input type="checkbox"/> | <input type="checkbox"/> | <input type="checkbox"/> |
| 1                        | 2                        | 3                        | 4                        |

2.8. Ich würde ein solches Training wieder nutzen, wenn ich Hilfe bräuchte.

|                          |                          |                          |                          |
|--------------------------|--------------------------|--------------------------|--------------------------|
| <input type="checkbox"/> | <input type="checkbox"/> | <input type="checkbox"/> | <input type="checkbox"/> |
| 1                        | 2                        | 3                        | 4                        |

### 3. Nutzbarkeit des Trainings (SUS)

3.1. Ich denke, dass ich das Programm (Reduct-Web-App) häufig benutzen würde.

| Stimme überhaupt nicht zu | 1                        | 2                        | 3                        | 4                        | 5                        | Stimme voll zu           |
|---------------------------|--------------------------|--------------------------|--------------------------|--------------------------|--------------------------|--------------------------|
| <input type="checkbox"/>  | <input type="checkbox"/> | <input type="checkbox"/> | <input type="checkbox"/> | <input type="checkbox"/> | <input type="checkbox"/> | <input type="checkbox"/> |

3.2. Ich fand das Programm (Reduct-Web-App) unnötig komplex.

| Stimme überhaupt nicht zu | 1                        | 2                        | 3                        | 4                        | 5                        | Stimme voll zu           |
|---------------------------|--------------------------|--------------------------|--------------------------|--------------------------|--------------------------|--------------------------|
| <input type="checkbox"/>  | <input type="checkbox"/> | <input type="checkbox"/> | <input type="checkbox"/> | <input type="checkbox"/> | <input type="checkbox"/> | <input type="checkbox"/> |

3.3. Ich fand das Programm (Reduct-Web-App) war einfach zu benutzen.

| Stimme überhaupt nicht zu | 1                        | 2                        | 3                        | 4                        | 5                        | Stimme voll zu           |
|---------------------------|--------------------------|--------------------------|--------------------------|--------------------------|--------------------------|--------------------------|
| <input type="checkbox"/>  | <input type="checkbox"/> | <input type="checkbox"/> | <input type="checkbox"/> | <input type="checkbox"/> | <input type="checkbox"/> | <input type="checkbox"/> |

3.4. Ich denke, ich hätte die Hilfe einer technisch versierten Person benötigt, um das Programm (Reduct-Web-App) besser nutzen zu können.

| Stimme überhaupt nicht zu | 1                        | 2                        | 3                        | 4                        | 5                        | Stimme voll zu           |
|---------------------------|--------------------------|--------------------------|--------------------------|--------------------------|--------------------------|--------------------------|
| <input type="checkbox"/>  | <input type="checkbox"/> | <input type="checkbox"/> | <input type="checkbox"/> | <input type="checkbox"/> | <input type="checkbox"/> | <input type="checkbox"/> |

3.5. Ich fand, die verschiedenen Funktionen in diesem Programm (Reduct-Web-App) griffen gut ineinander.

| Stimme<br>überhaupt nicht zu |                          |                          |                          |                          | Stimme<br>voll zu        |
|------------------------------|--------------------------|--------------------------|--------------------------|--------------------------|--------------------------|
| 1                            | 2                        | 3                        | 4                        | 5                        |                          |
| <input type="checkbox"/>     | <input type="checkbox"/> | <input type="checkbox"/> | <input type="checkbox"/> | <input type="checkbox"/> | <input type="checkbox"/> |

3.6. Ich denke, das Programm (Reduct-Web-App) enthielt zu viele Inkonsistenzen (Unstimmigkeiten).

| Stimme<br>überhaupt nicht zu |                          |                          |                          |                          | Stimme<br>voll zu        |
|------------------------------|--------------------------|--------------------------|--------------------------|--------------------------|--------------------------|
| 1                            | 2                        | 3                        | 4                        | 5                        |                          |
| <input type="checkbox"/>     | <input type="checkbox"/> | <input type="checkbox"/> | <input type="checkbox"/> | <input type="checkbox"/> | <input type="checkbox"/> |

3.7. Ich kann mir vorstellen, dass die meisten Menschen den Umgang mit diesem Programm (Reduct-Web-App) sehr schnell lernen können.

| Stimme<br>überhaupt nicht zu |                          |                          |                          |                          | Stimme<br>voll zu        |
|------------------------------|--------------------------|--------------------------|--------------------------|--------------------------|--------------------------|
| 1                            | 2                        | 3                        | 4                        | 5                        |                          |
| <input type="checkbox"/>     | <input type="checkbox"/> | <input type="checkbox"/> | <input type="checkbox"/> | <input type="checkbox"/> | <input type="checkbox"/> |

3.8. Ich fand das Programm (Reduct-Web-App) sehr umständlich zu benutzen.

| Stimme<br>überhaupt nicht zu |                          |                          |                          |                          | Stimme<br>voll zu        |
|------------------------------|--------------------------|--------------------------|--------------------------|--------------------------|--------------------------|
| 1                            | 2                        | 3                        | 4                        | 5                        |                          |
| <input type="checkbox"/>     | <input type="checkbox"/> | <input type="checkbox"/> | <input type="checkbox"/> | <input type="checkbox"/> | <input type="checkbox"/> |

3.9. Ich fühlte mich in der Benutzung des Programms (Reduct-Web-App) sehr sicher.

| Stimme<br>überhaupt nicht zu |                          |                          |                          |                          | Stimme<br>voll zu        |
|------------------------------|--------------------------|--------------------------|--------------------------|--------------------------|--------------------------|
| 1                            | 2                        | 3                        | 4                        | 5                        |                          |
| <input type="checkbox"/>     | <input type="checkbox"/> | <input type="checkbox"/> | <input type="checkbox"/> | <input type="checkbox"/> | <input type="checkbox"/> |

3.10. Ich musste eine Menge lernen, ehe ich anfangen konnte, das Programm (Reduct-Web-App) zu verwenden.

| Stimme<br>überhaupt nicht zu |                          |                          |                          |                          | Stimme<br>voll zu        |
|------------------------------|--------------------------|--------------------------|--------------------------|--------------------------|--------------------------|
| 1                            | 2                        | 3                        | 4                        | 5                        |                          |
| <input type="checkbox"/>     | <input type="checkbox"/> | <input type="checkbox"/> | <input type="checkbox"/> | <input type="checkbox"/> | <input type="checkbox"/> |

#### 4. Bewertung von Gesundheitsanwendungen für das Smartphone (Survey for Rating Healthcare Smartphone Applications)

|                                                                                                                     | Gar nicht<br>zutreffend | Ein wenig<br>zutreffen | Großenteils<br>zutreffend | Immer<br>zutreffen |
|---------------------------------------------------------------------------------------------------------------------|-------------------------|------------------------|---------------------------|--------------------|
| 4.1. Die in der Reduct-Web-App bereitgestellten Informationen sind korrekt (es gibt keine ungenauen Informationen). | 1                       | 2                      | 3                         | 4                  |
| 4.2. In der Reduct-Web-App werden klare Informationen bereitgestellt.                                               | 1                       | 2                      | 3                         | 4                  |
| 4.3. Die Gesundheitsinformationen in dem Programm sind leicht verständlich.                                         | 1                       | 2                      | 3                         | 4                  |
| 4.4. Die in der Reduct-Web-App bereitgestellten Gesundheitsinformationen werden in Alltagssprache erklärt.          | 1                       | 2                      | 3                         | 4                  |
| 4.5. Die in der Reduct-Web-App bereitgestellten Informationen sind für Nutzer im Allgemeinen leicht zu lesen.       | 1                       | 2                      | 3                         | 4                  |
| 4.6. Es werden professionelle Gesundheitsinformationen zur Verfügung gestellt.                                      | 1                       | 2                      | 3                         | 4                  |
| 4.7. Gesundheitsinformationen werden systematisch vermittelt.                                                       | 1                       | 2                      | 3                         | 4                  |
| 4.8. Es ist ersichtlich, dass die Gesundheitsinformationen aus verlässlichen Quellen zitiert werden                 | 1                       | 2                      | 3                         | 4                  |
| 4.9. Die bereitgestellten Gesundheitsinformationen stammen von medizinischen Experten.                              | 1                       | 2                      | 3                         | 4                  |
| 4.10. Das Programm ist kohärent/einheitlich in Bezug auf Farbe, Konfiguration und Ausdrucksweise.                   | 1                       | 2                      | 3                         | 4                  |

4.11. Die Anordnung der Symbole steht im Einklang mit dem gesamten Design des Programms.

1 2 3 4

4.12. Icons/Symbole werden in dem Programm einheitlich kategorisiert.

1 2 3 4

4.13. Die Inhalte sind gut organisiert, so dass sie zugänglich und logisch verständlich sind.

1 2 3 4

4.14. Die Bedeutung der einzelnen Icons/Symbole wird deutlich zum Ausdruck gebracht.

1 2 3 4

4.15. Die Reduct-Web-App hat eine gut lesbare Schrift/Schriftart.

1 2 3 4

4.16. Visuelle Elemente verwirren den Nutzer nicht.

1 2 3 4

4.17. Die Struktur der Reduct-Web-App ist klar ersichtlich.

1 2 3 4

4.18. Anweisungen werden kurz und bündig formuliert.

1 2 3 4

4.19. Anweisungen werden präzise erteilt.

1 2 3 4

4.20. Alle Wörter/ Sätze sind nicht nur korrekt geschrieben, sondern auch grammatikalisch korrekt.

1 2 3 4

1  
2  
3 4.21. Die Reduct-Web-App liefert  
4 Informationen zum Thema  
5 Datenschutz.  
6

1 2 3 4

7  
8  
9  
10 4.22. Die Reduct-Web-App liefert  
11 Informationen über  
12 Sicherheitsrichtlinien in Bezug auf  
13 persönliche Gesundheitsinformationen.  
14

1 2 3 4

15  
16  
17  
18 4.23. Die Reduct-Web-App erklärte das  
19 Sicherheitssystem zur Schaffung einer  
20 sicheren Umgebung für eine bessere  
21 Nutzung der mobilen App.  
22

1 2 3 4

## 23 24 25 26 27 5. Allgemeine Fragen

### 28 29 5.1. Fanden Sie die visuelle Darstellung der Module in der Reduct-Web-App ansprechend?

30  
31  
32  
33  
34       
35  
36 1 2 3 4 5  
37  
38 überhaupt eher weniger mäßig eher sehr  
39 nicht ansprechend ansprechend ansprechend ansprechend  
40 ansprechend  
41  
42  
43  
44  
45

### 46 5.2. Waren die Texte klar und verständlich?

47  
48       
49  
50 1 2 3 4 5  
51  
52 gar nicht eher nicht mäßig eher verständlich sehr verständlich  
53 verständlich verständlich verständlich  
54  
55  
56  
57  
58  
59  
60

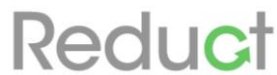

22

**5.3. Fanden Sie die Videos ansprechend?**

|                              |                          |                          |                          |                          |                              |
|------------------------------|--------------------------|--------------------------|--------------------------|--------------------------|------------------------------|
| <input type="checkbox"/>     | <input type="checkbox"/> | <input type="checkbox"/> | <input type="checkbox"/> | <input type="checkbox"/> | <input type="checkbox"/>     |
| 1                            | 2                        | 3                        | 4                        | 5                        | 6                            |
| überhaupt nicht<br>hilfreich | kaum hilfreich           | mäßig hilfreich          | eher hilfreich           | sehr hilfreich           | Kann ich nicht<br>beurteilen |

**5.4. Fanden Sie die Audio-Dateien ansprechend?**

|                                |                             |                          |                          |                          |                              |
|--------------------------------|-----------------------------|--------------------------|--------------------------|--------------------------|------------------------------|
| <input type="checkbox"/>       | <input type="checkbox"/>    | <input type="checkbox"/> | <input type="checkbox"/> | <input type="checkbox"/> | <input type="checkbox"/>     |
| 1                              | 2                           | 3                        | 4                        | 5                        | 6                            |
| überhaupt nicht<br>ansprechend | eher weniger<br>ansprechend | mäßig<br>ansprechend     | eher<br>ansprechend      | sehr ansprechend         | Kann ich nicht<br>beurteilen |

**5.5. Fanden Sie die Belohnungen ansprechend?**

|                                |                             |                          |                          |                          |                              |
|--------------------------------|-----------------------------|--------------------------|--------------------------|--------------------------|------------------------------|
| <input type="checkbox"/>       | <input type="checkbox"/>    | <input type="checkbox"/> | <input type="checkbox"/> | <input type="checkbox"/> | <input type="checkbox"/>     |
| 1                              | 2                           | 3                        | 4                        | 5                        | 6                            |
| überhaupt nicht<br>ansprechend | eher weniger<br>ansprechend | mäßig<br>ansprechend     | eher<br>ansprechend      | sehr ansprechend         | Kann ich nicht<br>beurteilen |

**5.6. Fanden Sie die Übungen hilfreich?**

|                              |                          |                          |                          |                          |                              |
|------------------------------|--------------------------|--------------------------|--------------------------|--------------------------|------------------------------|
| <input type="checkbox"/>     | <input type="checkbox"/> | <input type="checkbox"/> | <input type="checkbox"/> | <input type="checkbox"/> | <input type="checkbox"/>     |
| 1                            | 2                        | 3                        | 4                        | 5                        | 6                            |
| überhaupt nicht<br>hilfreich | kaum hilfreich           | mäßig hilfreich          | eher hilfreich           | sehr hilfreich           | Kann ich nicht<br>beurteilen |

**5.7. Sind Sie mit der Plattform „Reduct-Web-App“ zufrieden?**

|                              |                          |                          |                          |                          |
|------------------------------|--------------------------|--------------------------|--------------------------|--------------------------|
| <input type="checkbox"/>     | <input type="checkbox"/> | <input type="checkbox"/> | <input type="checkbox"/> | <input type="checkbox"/> |
| 1                            | 2                        | 3                        | 4                        | 5                        |
| überhaupt nicht<br>zufrieden | Kaum zufrieden           | mäßig zufrieden          | Eher zufrieden           | Sehr zufrieden           |

1  
2  
3  
4  
5  
6 **5.8. Hat die Plattform dir Sicherheit im Umgang mit deinen persönlichen Daten vermittelt?**  
7

8

9

10 1 2 3 4 5

11

12 überhaupt nicht eher weniger mäßig zutreffend eher zutreffend sehr zutreffend  
13 zutreffend zutreffend

14  
15  
16  
17  
18  
19

20 **5.9. Würden Sie die Reduct-Web-App an andere Betroffene weiterempfehlen?**  
21

22  ja  nein  
23  
24  
25  
26  
27  
28

29 **5.10. Würden Sie die Reduct-Web-App zukünftig nutzen?**  
30

31  ja  nein  
32  
33  
34  
35  
36  
37

38 **5.11. Inwiefern denken Sie, dass Sie persönlich von unserer Reduct-Web-App profitiert haben?**  
39

40

41

42

43

44 1 2 3 4 5

45

46 überhaupt nicht kaum mäßig eher Sehr  
47  
48  
49  
50

51 **5.12. Wurden Sie durch die Plattform „Reduct-Web-App“ motiviert, dass Training weiterzuführen?**  
52

53

54

55

56

57 1 2 3 4 5

58

59 Trifft überhaupt Trifft eher Trifft mäßig zu Trifft eher zu Trifft vollkommen  
60 nicht zu weniger zu zu zu zu



1  
2  
3  
4  
5 **5.13. Konnten Sie die Nutzung der Reduct-Web-App gut in Ihren Alltag einbauen?**  
6

7

8  
9  
10  
11 überhaupt nicht gut      Weniger gut      mäßig      Eher gut      Sehr gut  
12  
13  
14  
15  
16  
17

18 **5.14. Konnten Sie sich gut auf die Inhalte konzentrieren, wenn Sie das Training genutzt haben?**  
19

20

21  
22  
23  
24 Trifft überhaupt nicht zu      Trifft eher weniger zu      Trifft teilweise zu zu      Trifft eher zu      Trifft vollkommen zu  
25  
26  
27  
28  
29  
30  
31

32 **5.15. Hat Ihnen die Reduct-Web-App dabei geholfen mit krankheitsbezogenen Belastungen besser umzugehen?**  
33  
34

35

36  
37 1      2      3      4      5

38  
39 Trifft überhaupt nicht zu      Trifft eher weniger zu      Trifft teilweise zu zu      Trifft eher zu      Trifft vollkommen zu  
40  
41  
42  
43  
44  
45  
46  
47  
48  
49  
50  
51  
52  
53  
54  
55  
56  
57  
58  
59  
60

### III. Fragen zur Beschäftigung mit Achtsamkeit und der Reduct-Web-App

1) Bitte geben Sie an, wie häufig Sie während der Laufzeit der Reduct-Web-App Achtsamkeitsübungen in Ihren Alltag eingebaut haben.

|                          |                          |                          |                          |                          |                          |
|--------------------------|--------------------------|--------------------------|--------------------------|--------------------------|--------------------------|
| <input type="checkbox"/> |
| 1                        | 2                        | 3                        | 4                        | 5                        | 6                        |
| (fast) nie               | Ca. einmal im Monat      | Mehrmals im Monat        | Ca. einmal in der Woche  | Mehrmals in der Woche    | (fast) täglich           |

2) Konnten Sie die in der Reduct-Web-App erlernten Strategien/Skills in Ihren Alltag integrieren?

|                          |                          |                          |                          |                          |                          |
|--------------------------|--------------------------|--------------------------|--------------------------|--------------------------|--------------------------|
| <input type="checkbox"/> |
| 1                        | 2                        | 3                        | 4                        | 5                        | 6                        |
| (fast) nie               | Ca. einmal im Monat      | Mehrmals im Monat        | Ca. einmal in der Woche  | Mehrmals in der Woche    | (fast) täglich           |

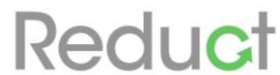

1  
2  
3 Liebe Teilnehmerin, lieber Teilnehmer,  
4

5  
6 Vielen Dank für Ihre Teilnahme an der ersten Befragung der Reduct Studie. Für die nächsten Schritte  
7 wird sich das Reduct Team in den nächsten Tagen bei Ihnen melden.  
8

9  
10 Sollten Sie Fragen haben, können Sie gerne jederzeit eine E-Mail an [reduct@uni-due.de](mailto:reduct@uni-due.de) senden.  
11

12  
13 Wir wünschen Ihnen alles Gute!  
14

15 Ihr Reduct Team  
16  
17  
18  
19  
20  
21  
22  
23  
24  
25  
26  
27  
28  
29  
30  
31  
32  
33  
34  
35  
36  
37  
38  
39  
40  
41  
42  
43  
44  
45  
46  
47  
48  
49  
50  
51  
52  
53  
54  
55  
56  
57  
58  
59  
60

For peer review only

Teilnehmer-ID: \_\_\_\_\_

# Reduct- Web-Basierte Achtsamkeits- und Skillsbasierte Stressreduktion für Patientinnen und Patienten mit Krebs

Liebe Teilnehmerin, lieber Teilnehmer,

wir hoffen, dass Ihnen die Reduct-Web-App gefallen hat und dass Sie die Inhalte als hilfreich im Umgang mit Belastungen erlebt haben. Die Informationen und Übungen, die Sie gesammelt haben, stehen Ihnen aber weiterhin zur Verfügung. Somit können Sie diese auch zukünftig zum Üben ihrer Skills nutzen und somit nachhaltig und langfristig vom Training profitieren.

Zum Abschluss des Trainings möchten wir Sie bitten, erneut einen Fragebogen auszufüllen. Dieser wird ca. 15 - 20 Minuten Ihrer Zeit in Anspruch nehmen. Wir möchten gerne erfahren, wie Sie die Inhalte der Reduct-Web-App sowie die technische Umsetzung erlebt haben. Diese Informationen helfen uns dabei, das Training zu verbessern und vielen Patienten zur Verfügung zu stellen.

Sollten Sie Fragen haben, können Sie gerne jederzeit eine E-Mail an [reduct@uni-due.de](mailto:reduct@uni-due.de) senden.

Wenn Sie merken, dass Sie sich sehr belastet fühlen und Sie mehr Unterstützung bei der Bewältigung Ihrer Erkrankung benötigen, können Sie sich jederzeit an die/den Studienverantwortliche/n Ihres Zentrums wenden. Diese/r kann Ihnen bei der Suche psychoonkologischer Hilfsangebote zur Seite stehen.

Vielen Dank für Ihre Teilnahme und Unterstützung!

Ihr Reduct Team

[\\*Kontaktdaten](#)

[2]

## I. Fragen zu Ihrem derzeitigen Befinden

### 1. Angst und Stresserleben

Bitte beantworten Sie im Folgenden, wie sehr die jeweilige Aussage in der letzten Woche auf Sie zutraf.

- |                                                                                           |                                                                     |
|-------------------------------------------------------------------------------------------|---------------------------------------------------------------------|
| 1.1. Ich fühle mich angespannt oder überreizt.                                            | 1.2. Ich fühle mich in meinen Aktivitäten gebremst.                 |
| 3 meistens                                                                                | 3 fast immer                                                        |
| 2 oft                                                                                     | 2 sehr oft                                                          |
| 1 von Zeit zu Zeit/ gelegentlich                                                          | 1 manchmal                                                          |
| 0 überhaupt nicht                                                                         | 0 überhaupt nicht                                                   |
| 1.3. Ich kann mich heute noch so freuen wie früher.                                       | 1.4. Ich habe manchmal ein ängstliches Gefühl in der Magengegend.   |
| 0 ganz genau so                                                                           | 0 überhaupt nicht                                                   |
| 1 nicht ganz so sehr                                                                      | 1 gelegentlich                                                      |
| 2 Nur noch ein wenig                                                                      | 2 ziemlich oft                                                      |
| 3 kaum oder gar nicht                                                                     | 3 sehr oft                                                          |
| 1.5. Mich überkommt eine ängstliche Vorahnung, dass etwas Schreckliches passieren könnte. | 1.6. Ich habe das Interesse an meiner äußeren Erscheinung verloren. |
| 3 ja, sehr stark                                                                          | 3 ja, stimmt genau                                                  |
| 2 ja, aber nicht allzu stark                                                              | 2 ich kümmere mich nicht so sehr darum, wie ich sollte              |
| 1 etwas, aber es macht mir keine Sorgen                                                   | 1 möglicherweise kümmere ich mich zu wenig darum                    |
| 0 überhaupt nicht                                                                         | 0 ich kümmere mich so viel darum wie immer                          |

1  
2  
3  
4  
5  
6  
7  
8  
9  
10  
11  
12  
13  
14  
15  
16  
17  
18  
19  
20  
21  
22  
23  
24  
25  
26  
27  
28  
29  
30  
31  
32  
33  
34  
35  
36  
37  
38  
39  
40  
41  
42  
43  
44  
45  
46  
47  
48  
49  
50  
51  
52  
53  
54  
55  
56  
57  
58  
59  
60

1.7. Ich kann lachen und die lustige Seite der Dinge sehen.

- 0 ja, so viel wie immer
- 1 nicht mehr ganz so viel
- 2 inzwischen viel weniger
- 3 überhaupt nicht

1.8. Ich fühle mich rastlos, muss immer in Bewegung sein.

- 3 ja, tatsächlich sehr
- 2 ziemlich
- 1 nicht sehr
- 0 überhaupt nicht

1.9. Mir gehen beunruhigende Gedanken durch den Kopf.

- 3 einen Großteil der Zeit
- 2 verhältnismäßig oft
- 1 von Zeit zu Zeit, aber nicht allzu oft
- 0 nur gelegentlich/nie

1.10. Ich blicke mit Freude in die Zukunft.

- 0 ja, sehr
- 1 eher weniger als früher
- 2 viel weniger als früher
- 3 kaum bis gar nicht

1.11. Ich fühle mich glücklich.

- 3 überhaupt nicht
- 2 selten
- 1 manchmal
- 0 meistens

1.12. Mich überkommt plötzlich ein panikartiger Zustand.

- 3 ja, tatsächlich sehr oft
- 2 ziemlich oft
- 1 nicht sehr oft
- 0 überhaupt nicht

1.13. Ich kann behaglich dasitzen und mich entspannen.

- 0 ja, natürlich
- 1 gewöhnlich schon
- 2 nicht oft
- 3 überhaupt nicht

1.14. Ich kann mich an einem guten Buch, einer Radio- oder Fernsehsendung erfreuen.

- 0 oft
- 1 manchmal
- 2 Eher selten
- 3 Sehr selten

## 2. Belastungsthermometer

Bitte markieren Sie am Thermometer die Zahl, die am besten beschreibt, wie belastet Sie sich in der letzten Woche einschließlich heute gefühlt haben.

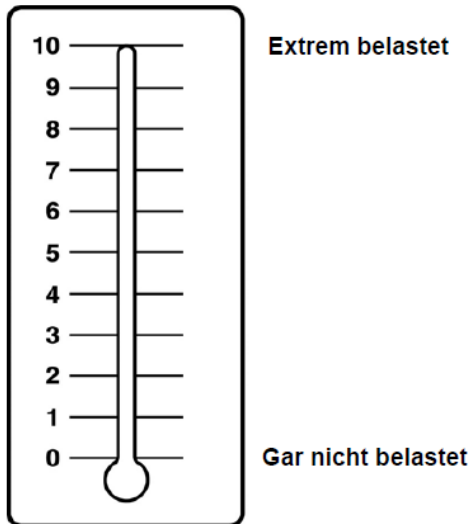

For review only

### 3. Skala zur Allgemeinen Selbstwirksamkeitserwartung

Kreuzen Sie bitte bei jeder Frage die Antwort an, die am besten auf Sie zutrifft.

|                                                                                                    | Stimmt<br>nicht | Stimmt<br>kaum | Stimmt<br>eher | Stimmt<br>genau |
|----------------------------------------------------------------------------------------------------|-----------------|----------------|----------------|-----------------|
| 3.1. Wenn sich Widerstände auftun, finde ich Mittel und Wege, mich durchzusetzen.                  | 1               | 2              | 3              | 4               |
| 3.2. Die Lösung schwieriger Probleme gelingt mir immer, wenn ich mich darum bemühe.                | 1               | 2              | 3              | 4               |
| 3.3. Es bereitet mir keine Schwierigkeiten, meine Absichten und Ziele zu verwirklichen.            | 1               | 2              | 3              | 4               |
| 3.4. In unerwarteten Situationen weiß ich immer, wie ich mich verhalten soll.                      | 1               | 2              | 3              | 4               |
| 3.5. Auch bei überraschenden Ereignissen glaube ich, dass ich gut mit ihnen zurechtkommen kann.    | 1               | 2              | 3              | 4               |
| 3.6. Schwierigkeiten sehe ich gelassen entgegen, weil ich meinen Fähigkeiten immer vertrauen kann. | 1               | 2              | 3              | 4               |
| 3.7. Was auch immer passiert, ich werde schon klarkommen.                                          | 1               | 2              | 3              | 4               |
| 3.8. Für jedes Problem kann ich eine Lösung finden.                                                | 1               | 2              | 3              | 4               |
| 3.9. Wenn eine neue Sache auf mich zukommt, weiß ich, wie ich damit umgehen kann.                  | 1               | 2              | 3              | 4               |
| 3.10. Wenn ein Problem auftaucht, kann ich es aus eigener Kraft meistern.                          | 1               | 2              | 3              | 4               |



#### 4. Lebensqualität (EORT-QLQ-C30)

Bitte kreuzen Sie im Folgenden Abschnitt die Zahl von 1 bis 4 an, die am besten auf Sie zutrifft.

|                                                                                                                                      | Überhaupt<br>nicht | Wenig | Mäßig | Sehr |
|--------------------------------------------------------------------------------------------------------------------------------------|--------------------|-------|-------|------|
| 4.1. Bereitet es Ihnen Schwierigkeiten, sich körperlich anzustrengen (z.B. eine schwere Einkaufstasche oder einen Koffer zu tragen)? | 1                  | 2     | 3     | 4    |
| 4.2. Bereitet es Ihnen Schwierigkeiten, einen <u>längeren</u> Spaziergang zu machen?                                                 | 1                  | 2     | 3     | 4    |
| 4.3. Bereitet es Ihnen Schwierigkeiten, eine <u>kurze</u> Strecke außer Haus zu gehen?                                               | 1                  | 2     | 3     | 4    |
| 4.4. Müssen Sie tagsüber im Bett liegen oder in einem Sessel sitzen?                                                                 | 1                  | 2     | 3     | 4    |
| 4.5. Brauchen Sie Hilfe beim Essen, Anziehen, Waschen oder Benutzen der Toilette?                                                    | 1                  | 2     | 3     | 4    |
| <b>Während der letzten Woche:</b>                                                                                                    |                    |       |       |      |
|                                                                                                                                      | Überhaupt<br>nicht | Wenig | Mäßig | Sehr |
| 4.6. Waren Sie bei Ihrer Arbeit oder bei anderen tagtäglichen Beschäftigungen eingeschränkt?                                         | 1                  | 2     | 3     | 4    |
| 4.7. Waren Sie bei Ihren Hobbys oder andere Freizeitbeschäftigungen eingeschränkt?                                                   | 1                  | 2     | 3     | 4    |
| 4.8. Waren Sie kurzatmig?                                                                                                            | 1                  | 2     | 3     | 4    |
| 4.9. Hatten Sie Schmerzen?                                                                                                           | 1                  | 2     | 3     | 4    |
| 4.10. Mussten Sie sich ausruhen?                                                                                                     | 1                  | 2     | 3     | 4    |
| 4.11. Hatten Sie Schlafstörungen?                                                                                                    | 1                  | 2     | 3     | 4    |

1  
2  
3 4.12. Fühlten Sie sich schwach?

4 1 2 3 4

5  
6  
7  
8 **Während der letzten Woche:**

**Überhaupt  
nicht**

**Wenig**

**Mäßig**

**Sehr**

9  
10  
11 4.13. Hatten Sie Appetitmangel?

12 1 2 3 4

13  
14 4.14. War Ihnen übel?

15 1 2 3 4

16  
17 4.15. Haben Sie erbrochen?

18 1 2 3 4

19  
20 4.16. Hatten Sie Verstopfung?

21 1 2 3 4

22  
23 4.17. Hatten Sie Durchfall?

24 1 2 3 4

25  
26 4.18. Waren Sie müde?

27 1 2 3 4

28  
29 4.19. Fühlten Sie sich durch  
30 Schmerzen in Ihrem alltäglichen  
31 Leben beeinträchtigt?

32 1 2 3 4

33  
34 4.20. Hatten Sie Schwierigkeiten, sich  
35 auf etwas zu konzentrieren, z.B. auf  
36 das Zeitungslesen oder das  
37 Fernsehen?

38 1 2 3 4

39  
40 4.21. Fühlten Sie sich angespannt?

41 1 2 3 4

42  
43 4.22. Haben Sie sich Sorgen  
44 gemacht?

45 1 2 3 4

46  
47 4.23. Waren Sie reizbar?

48 1 2 3 4

49  
50 4.24. Fühlten Sie sich  
niedergeschlagen?

51 1 2 3 4

52  
53 4.25. Hatten Sie Schwierigkeiten, sich  
an Dinge zu erinnern?

54 1 2 3 4

55  
56 4.26. Hat Ihr körperlicher Zustand  
oder Ihre medizinische Behandlung  
57 Ihr Familienleben beeinträchtigt?

58 1 2 3 4

1  
2  
3 4.27. Hat Ihr körperlicher Zustand 1 2 3 4  
4 oder Ihre medizinische Behandlung  
5 Ihr Zusammensein oder Ihre  
6 gemeinsamen Unternehmungen mit  
7 anderen Menschen beeinträchtigt?  
8

9  
10  
11 4.28. Hat Ihr körperlicher Zustand 1 2 3 4  
12 oder Ihre medizinische Behandlung  
13 für Sie finanzielle Schwierigkeiten mit  
14 sich gebracht?  
15

16 **Bitte kreuzen Sie bei den folgenden Fragen die Zahl zwischen 1 und 7 an, die am besten auf Sie**  
17 **zutrifft.**

18  
19  
20 4.29. Wie würden Sie insgesamt Ihren Gesundheitszustand während der letzten Woche  
21 einschätzen?  
22

23 1 2 3 4 5 6 7  
24  
25 sehr ausgezeichnet  
26 schlecht

27  
28 4.30. Wie würden Sie insgesamt Ihre Lebensqualität während der letzten Woche einschätzen?  
29

30 1 2 3 4 5 6 7  
31  
32 sehr ausgezeichnet  
33 schlecht  
34  
35  
36  
37  
38  
39  
40  
41  
42  
43  
44  
45  
46  
47  
48  
49  
50  
51  
52  
53  
54  
55  
56  
57  
58  
59  
60

1  
2  
3  
4  
5  
6  
7  
8 **5. Lebensqualität (EQ-5D-5L)**

9 **Bitte kreuzen Sie unter jeder Überschrift das Kästchen an, das Ihren Gesundheitszustand heute am**  
10 **besten beschreibt.**

11 **besten beschreibt.**

12  
13  
14  
15 **5.1. Beweglichkeit/Mobilität**

16  
17 Ich habe keine Probleme herumzugehen 1

18 Ich habe leichte Probleme herumzugehen 2

19 Ich habe mäßige Probleme herumzugehen 3

20 Ich habe große Probleme herumzugehen 4

21 Ich bin nicht in der Lage, herumzugehen 5

22  
23  
24  
25  
26  
27  
28  
29 **5.2. Für sich selbst sorgen**

30 Ich habe keine Probleme, mich selbst zu waschen oder anzuziehen 1

31 Ich habe leichte Probleme, mich selbst zu waschen oder anzuziehen 2

32 Ich habe mäßige Probleme, mich selbst zu waschen oder anzuziehen 3

33 Ich habe große Probleme, mich selbst zu waschen oder anzuziehen 4

34 Ich bin nicht in der Lage, mich selbst zu waschen oder anzuziehen 5

35  
36  
37  
38  
39  
40  
41  
42  
43 **5.3. Alltägliche Tätigkeiten (z.B. Arbeit, Studium, Hausarbeit, Familien- oder Freizeitaktivitäten)**

44 Ich habe keine Probleme, meinen alltäglichen Tätigkeiten nachzugehen 1

45 Ich habe leichte Probleme, meinen alltäglichen Tätigkeiten nachzugehen 2

46 Ich habe mäßige Probleme, meinen alltäglichen Tätigkeiten nachzugehen 3

47 Ich habe große Probleme, meinen alltäglichen Tätigkeiten nachzugehen 4

48 Ich bin nicht in der Lage, meinen alltäglichen Tätigkeiten nachzugehen 5

**5.4. Schmerzen/Körperliche Beschwerden**

|                                             |   |
|---------------------------------------------|---|
| Ich habe keine Schmerzen oder Beschwerden   | 1 |
| Ich habe leichte Schmerzen oder Beschwerden | 2 |
| Ich habe mäßige Schmerzen oder Beschwerden  | 3 |
| Ich habe starke Schmerzen oder Beschwerden  | 4 |
| Ich habe extreme Schmerzen oder Beschwerden | 5 |

**5.5. Angst/Niedergeschlagenheit**

|                                             |   |
|---------------------------------------------|---|
| Ich bin nicht ängstlich oder deprimiert     | 1 |
| Ich bin ein wenig ängstlich oder deprimiert | 2 |
| Ich bin mäßig ängstlich oder deprimiert     | 3 |
| Ich bin sehr ängstlich oder deprimiert      | 4 |
| Ich bin extrem ängstlich oder deprimiert    | 5 |

1  
2  
3  
4  
5  
6  
7  
8 **5.6. Um Sie bei der Einschätzung, wie gut oder wie schlecht Ihr**  
9 **Gesundheitszustand ist, zu unterstützen, haben wir eine Skala**  
10 **gezeichnet, ähnlich einem Thermometer. Der best denkbare**  
11 **Gesundheitszustand ist mit einer "100" gekennzeichnet, der**  
12 **schlechteste mit "0".**

13  
14 **Wir möchten Sie nun bitten, auf dieser Skala zu kennzeichnen,**  
15 **wie gut oder schlecht Ihrer Ansicht nach Ihr persönlicher**  
16 **Gesundheitszustand heute ist. Bitte verbinden Sie dazu den**  
17 **untenstehenden Kasten mit dem Punkt auf der Skala, der Ihren**  
18 **heutigen Gesundheitszustand am besten wiedergibt.**  
19  
20  
21  
22  
23  
24  
25  
26  
27  
28  
29  
30

31 **Ihr heutiger**  
32 **Gesundheitszustand**  
33  
34  
35  
36  
37  
38  
39  
40  
41  
42  
43  
44  
45  
46  
47  
48  
49  
50  
51  
52  
53  
54  
55  
56  
57  
58  
59  
60

Best  
denkbarer  
Gesundheitszustand

100

90

80

70

60

50

40

30

20

10

0

Schlechtest  
denkbarer  
Gesundheitszustand

## 6. Achtsamkeit (FFA)

Dieser Fragebogen soll Ihre Achtsamkeit erfassen. Bitte beziehen Sie dabei die Aussagen auf die letzten 14 Tage. Kreuzen Sie bitte bei jeder Frage die Antwort an, die am besten auf Sie zutrifft.

For peer review only

**7. Wie oft fühlten Sie sich im Verlauf der letzten 2 Wochen durch die folgenden Beschwerden beeinträchtigt? (PHQ-4)**

|                                                                                                             | <b>Fast nie</b> | <b>Eher selten</b> | <b>Relativ oft</b> | <b>Fast immer</b> |
|-------------------------------------------------------------------------------------------------------------|-----------------|--------------------|--------------------|-------------------|
| 6.1. Ich bin offen für die Erfahrung des Augenblicks.                                                       | 1               | 2                  | 3                  | 4                 |
| 6.2. Ich spüre in meinen Körper hinein, sei es beim Essen, Kochen, Putzen, Reden.                           | 1               | 2                  | 3                  | 4                 |
| 6.3. Wenn ich merke, dass ich abwesend war, kehre ich sanft zur Erfahrung des Augenblicks zurück.           | 1               | 2                  | 3                  | 4                 |
| 6.4. Ich kann mich selbst wertschätzen.                                                                     | 1               | 2                  | 3                  | 4                 |
| 6.5. Ich achte auf die Motive meiner Handlungen.                                                            | 1               | 2                  | 3                  | 4                 |
| 6.6. Ich sehe meine Fehler und Schwierigkeiten, ohne mich zu verurteilen.                                   | 1               | 2                  | 3                  | 4                 |
| 6.7. Ich bin in Kontakt mit meinen Erfahrungen, hier und jetzt.                                             | 1               | 2                  | 3                  | 4                 |
| 6.8. Ich nehme unangenehme Erfahrungen an.                                                                  | 1               | 2                  | 3                  | 4                 |
| 6.9. Ich bin mir selbst gegenüber freundlich, wenn Dinge schief laufen.                                     | 1               | 2                  | 3                  | 4                 |
| 6.10. Ich beobachte meine Gefühle, ohne mich in ihnen zu verlieren.                                         | 1               | 2                  | 3                  | 4                 |
| 6.11. In schwierigen Situationen kann ich innehalten.                                                       | 1               | 2                  | 3                  | 4                 |
| 6.12. Ich erlebe Momente innerer Ruhe und Gelassenheit, selbst wenn äußerlich Schmerzen und Unruhe da sind. | 1               | 2                  | 3                  | 4                 |
| 6.13. Ich bin ungeduldig mit mir und meinen Mitmenschen.                                                    | 4               | 3                  | 2                  | 1                 |
| 6.14. Ich kann darüber lächeln, wenn ich sehe, wie ich mir manchmal das Leben schwer mache.                 | 1               | 2                  | 3                  | 4                 |



|                                                                      | Überhaupt<br>nicht | An einzelnen<br>Tagen | An mehr als<br>der Hälfte der<br>Tage | Beinahe<br>jeden Tag |
|----------------------------------------------------------------------|--------------------|-----------------------|---------------------------------------|----------------------|
| 7.1. Wenig Interesse oder Freude an Ihren Tätigkeiten                | 0                  | 1                     | 2                                     | 3                    |
| 7.2. Niedergeschlagenheit, Schwermut oder Hoffnungslosigkeit         | 0                  | 1                     | 2                                     | 3                    |
| 7.3. Nervosität, Ängstlichkeit oder Anspannung                       | 0                  | 1                     | 2                                     | 3                    |
| 7.4. Nicht in der Lage sein, Sorgen zu stoppen oder zu kontrollieren | 0                  | 1                     | 2                                     | 3                    |

## 8. Skills

Kreuzen Sie bitte bei jeder Frage die Antwort an, die am besten auf Sie zutrifft.

## II. Fragen zum Training

### 1. Patientenzufriedenheit (CSQ-1 adapted to Internet-based interventions)

Nun folgen Fragen dazu, wie zufrieden Sie mit dem Training/ der Reduct-Web-App waren.

|                                                                                                               | Stimmt<br>überhaupt<br>nicht | 1 | 2 | Neutral | 3 | 4 | Stimmt<br>voll-<br>kommen | 5 |
|---------------------------------------------------------------------------------------------------------------|------------------------------|---|---|---------|---|---|---------------------------|---|
| 8.1. In belastenden Situationen kann ich mich aufmuntern, indem ich meine Gedanken auf positive Dinge richte. | 1                            | 2 | 3 | 4       | 5 |   |                           |   |
| 8.2. Meine Gedanken geben mir im Umgang mit stressigen Situationen Kraft.                                     | 1                            | 2 | 3 | 4       | 5 |   |                           |   |
| 8.3. Wenn ich belastende Gefühle verspüre, lasse ich sie zu.                                                  | 1                            | 2 | 3 | 4       | 5 |   |                           |   |
| 8.4. Ich kann Dinge annehmen, die ich nicht ändern kann.                                                      | 1                            | 2 | 3 | 4       | 5 |   |                           |   |
| 8.5. Ich überlege mir, was ich im Umgang mit der Krebserkrankung tun kann.                                    | 1                            | 2 | 3 | 4       | 5 |   |                           |   |
| 8.6. Ich führe oft bestimmte Aktivitäten aus, um auf andere Gedanken zu kommen.                               | 1                            | 2 | 3 | 4       | 5 |   |                           |   |
| 8.7. Ich kann mir wohlwollend begegnen.                                                                       | 1                            | 2 | 3 | 4       | 5 |   |                           |   |
| 8.8. Ich kann gut für mich sorgen.                                                                            | 1                            | 2 | 3 | 4       | 5 |   |                           |   |
| 8.9. Ich suche Kontakt zu liebevollen Menschen.                                                               | 1                            | 2 | 3 | 4       | 5 |   |                           |   |
| 8.10. Ich kann nach Unterstützung suchen.                                                                     | 1                            | 2 | 3 | 4       | 5 |   |                           |   |

|                                                                                                                                  | Trifft<br>nicht zu       | Trifft<br>eher<br>nicht zu | Trifft<br>teilweise<br>zu | Trifft voll<br>und ganz<br>zu |
|----------------------------------------------------------------------------------------------------------------------------------|--------------------------|----------------------------|---------------------------|-------------------------------|
| 2.1. Das Training, an dem ich teilgenommen habe, hatte eine hohe Qualität                                                        | <input type="checkbox"/> | <input type="checkbox"/>   | <input type="checkbox"/>  | <input type="checkbox"/>      |
|                                                                                                                                  | 1                        | 2                          | 3                         | 4                             |
| 2.2. Ich habe die Art von Training erhalten, die ich wollte.                                                                     | <input type="checkbox"/> | <input type="checkbox"/>   | <input type="checkbox"/>  | <input type="checkbox"/>      |
|                                                                                                                                  | 1                        | 2                          | 3                         | 4                             |
| 2.3. Das Training hat meinen Bedürfnissen entsprochen.                                                                           | <input type="checkbox"/> | <input type="checkbox"/>   | <input type="checkbox"/>  | <input type="checkbox"/>      |
|                                                                                                                                  | 1                        | 2                          | 3                         | 4                             |
| 2.4. Ich würde einem Freund oder einer Freundin dieses Training empfehlen, wenn er oder sie eine ähnliche Hilfe benötigen würde. | <input type="checkbox"/> | <input type="checkbox"/>   | <input type="checkbox"/>  | <input type="checkbox"/>      |
|                                                                                                                                  | 1                        | 2                          | 3                         | 4                             |
| 2.5. Ich bin zufrieden mit dem Ausmaß der Hilfe, die ich durch das Training erhalten habe.                                       | <input type="checkbox"/> | <input type="checkbox"/>   | <input type="checkbox"/>  | <input type="checkbox"/>      |
|                                                                                                                                  | 1                        | 2                          | 3                         | 4                             |
| 2.6. Das Training hat mir dabei geholfen, angemessener mit meinen Problemen umzugehen.                                           | <input type="checkbox"/> | <input type="checkbox"/>   | <input type="checkbox"/>  | <input type="checkbox"/>      |
|                                                                                                                                  | 1                        | 2                          | 3                         | 4                             |
| 2.7. Im Großen und Ganzen bin ich mit dem Training zufrieden.                                                                    | <input type="checkbox"/> | <input type="checkbox"/>   | <input type="checkbox"/>  | <input type="checkbox"/>      |
|                                                                                                                                  | 1                        | 2                          | 3                         | 4                             |
| 2.8. Ich würde ein solches Training wieder nutzen, wenn ich Hilfe bräuchte.                                                      | <input type="checkbox"/> | <input type="checkbox"/>   | <input type="checkbox"/>  | <input type="checkbox"/>      |
|                                                                                                                                  | 1                        | 2                          | 3                         | 4                             |

## 2. Nutzbarkeit des Trainings (SUS)

2.1. Ich denke, dass ich das Programm (Reduct-Web-App) häufig benutzen würde.

| Stimme<br>überhaupt nicht zu | 1                        | 2                        | 3                        | 4                        | Stimme<br>voll zu        |
|------------------------------|--------------------------|--------------------------|--------------------------|--------------------------|--------------------------|
|                              | 1                        | 2                        | 3                        | 4                        | 5                        |
|                              | <input type="checkbox"/> |

2.2. Ich fand das Programm (Reduct-Web-App) unnötig komplex.

| Stimme<br>überhaupt nicht zu | 1                        | 2                        | 3                        | 4                        | Stimme<br>voll zu        |
|------------------------------|--------------------------|--------------------------|--------------------------|--------------------------|--------------------------|
|                              | 1                        | 2                        | 3                        | 4                        | 5                        |
|                              | <input type="checkbox"/> |

2.3 Ich fand das Programm (Reduct-Web-App) war einfach zu benutzen.

| Stimme<br>überhaupt nicht zu | 1                        | 2                        | 3                        | 4                        | Stimme<br>voll zu        |
|------------------------------|--------------------------|--------------------------|--------------------------|--------------------------|--------------------------|
|                              | 1                        | 2                        | 3                        | 4                        | 5                        |
|                              | <input type="checkbox"/> |

2.4 Ich denke, ich hätte die Hilfe einer technisch versierten Person benötigt, um das Programm (Reduct-Web-App) besser nutzen zu können.

| Stimme<br>überhaupt nicht zu | 1                        | 2                        | 3                        | 4                        | Stimme<br>voll zu        |
|------------------------------|--------------------------|--------------------------|--------------------------|--------------------------|--------------------------|
|                              | 1                        | 2                        | 3                        | 4                        | 5                        |
|                              | <input type="checkbox"/> |

2.5 Ich fand, die verschiedenen Funktionen in diesem Programm (Reduct-Web-App) griffen gut ineinander.

| Stimme<br>überhaupt nicht zu | 1                        | 2                        | 3                        | 4                        | Stimme<br>voll zu        |
|------------------------------|--------------------------|--------------------------|--------------------------|--------------------------|--------------------------|
|                              | 1                        | 2                        | 3                        | 4                        | 5                        |
|                              | <input type="checkbox"/> |

2.6 Ich denke, das Programm (Reduct-Web-App) enthielt zu viele Inkonsistenzen (Unstimmigkeiten).

| Stimme<br>überhaupt nicht zu | 1                        | 2                                   | 3                        | 4                        | Stimme<br>voll zu        |
|------------------------------|--------------------------|-------------------------------------|--------------------------|--------------------------|--------------------------|
|                              | 1                        | 2                                   | 3                        | 4                        | 5                        |
|                              | <input type="checkbox"/> | <input checked="" type="checkbox"/> | <input type="checkbox"/> | <input type="checkbox"/> | <input type="checkbox"/> |

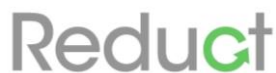

2.7 Ich kann mir vorstellen, dass die meisten Menschen den Umgang mit diesem Programm (Reduct-Web-App) sehr schnell lernen können.

|                              |                          |                          |                          |                          |                          |
|------------------------------|--------------------------|--------------------------|--------------------------|--------------------------|--------------------------|
| Stimme<br>überhaupt nicht zu |                          |                          |                          |                          | Stimme<br>voll zu        |
| 1                            | 2                        | 3                        | 4                        | 5                        |                          |
| <input type="checkbox"/>     | <input type="checkbox"/> | <input type="checkbox"/> | <input type="checkbox"/> | <input type="checkbox"/> | <input type="checkbox"/> |

2.8 Ich fand das Programm (Reduct-Web-App) sehr umständlich zu benutzen.

|                              |                          |                          |                          |                          |                          |
|------------------------------|--------------------------|--------------------------|--------------------------|--------------------------|--------------------------|
| Stimme<br>überhaupt nicht zu |                          |                          |                          |                          | Stimme<br>voll zu        |
| 1                            | 2                        | 3                        | 4                        | 5                        |                          |
| <input type="checkbox"/>     | <input type="checkbox"/> | <input type="checkbox"/> | <input type="checkbox"/> | <input type="checkbox"/> | <input type="checkbox"/> |

2.9 Ich fühlte mich in der Benutzung des Programms (Reduct-Web-App) sehr sicher.

|                              |                          |                          |                          |                          |                          |
|------------------------------|--------------------------|--------------------------|--------------------------|--------------------------|--------------------------|
| Stimme<br>überhaupt nicht zu |                          |                          |                          |                          | Stimme<br>voll zu        |
| 1                            | 2                        | 3                        | 4                        | 5                        |                          |
| <input type="checkbox"/>     | <input type="checkbox"/> | <input type="checkbox"/> | <input type="checkbox"/> | <input type="checkbox"/> | <input type="checkbox"/> |

2.10 Ich musste eine Menge lernen, ehe ich anfangen konnte, das Programm (Reduct-Web-App) zu verwenden.

|                              |                          |                          |                          |                          |                          |
|------------------------------|--------------------------|--------------------------|--------------------------|--------------------------|--------------------------|
| Stimme<br>überhaupt nicht zu |                          |                          |                          |                          | Stimme<br>voll zu        |
| 1                            | 2                        | 3                        | 4                        | 5                        |                          |
| <input type="checkbox"/>     | <input type="checkbox"/> | <input type="checkbox"/> | <input type="checkbox"/> | <input type="checkbox"/> | <input type="checkbox"/> |

### 3. Bewertung von Gesundheitsanwendungen für das Smartphone (Survey for Rating Healthcare Smartphone Applications)

|                                                                                                                     | Gar nicht<br>zutreffend | Ein wenig<br>zutreffen | Großenteils<br>zutreffend | Immer<br>zutreffen |
|---------------------------------------------------------------------------------------------------------------------|-------------------------|------------------------|---------------------------|--------------------|
| 4.1. Die in der Reduct-Web-App bereitgestellten Informationen sind korrekt (es gibt keine ungenauen Informationen). | 1                       | 2                      | 3                         | 4                  |
| 4.2. In der Reduct-Web-App werden klare Informationen bereitgestellt.                                               | 1                       | 2                      | 3                         | 4                  |
| 4.3. Die Gesundheitsinformationen in dem Programm sind leicht verständlich.                                         | 1                       | 2                      | 3                         | 4                  |
| 4.4. Die in der Reduct-Web-App bereitgestellten Gesundheitsinformationen werden in Alltagssprache erklärt.          | 1                       | 2                      | 3                         | 4                  |
| 4.5. Die in der Reduct-Web-App bereitgestellten Informationen sind für Nutzer im Allgemeinen leicht zu lesen.       | 1                       | 2                      | 3                         | 4                  |
| 4.6. Es werden professionelle Gesundheitsinformationen zur Verfügung gestellt.                                      | 1                       | 2                      | 3                         | 4                  |
| 4.7. Gesundheitsinformationen werden systematisch vermittelt.                                                       | 1                       | 2                      | 3                         | 4                  |
| 4.8. Es ist ersichtlich, dass die Gesundheitsinformationen aus verlässlichen Quellen zitiert werden                 | 1                       | 2                      | 3                         | 4                  |
| 4.9. Die bereitgestellten Gesundheitsinformationen stammen von medizinischen Experten.                              | 1                       | 2                      | 3                         | 4                  |
| 4.10. Das Programm ist kohärent/einheitlich in Bezug auf Farbe, Konfiguration und Ausdrucksweise.                   | 1                       | 2                      | 3                         | 4                  |

|    |  |  |  |  |
|----|--|--|--|--|
| 1  |  |  |  |  |
| 2  |  |  |  |  |
| 3  |  |  |  |  |
| 4  |  |  |  |  |
| 5  |  |  |  |  |
| 6  |  |  |  |  |
| 7  |  |  |  |  |
| 8  |  |  |  |  |
| 9  |  |  |  |  |
| 10 |  |  |  |  |
| 11 |  |  |  |  |
| 12 |  |  |  |  |
| 13 |  |  |  |  |
| 14 |  |  |  |  |
| 15 |  |  |  |  |
| 16 |  |  |  |  |
| 17 |  |  |  |  |
| 18 |  |  |  |  |
| 19 |  |  |  |  |
| 20 |  |  |  |  |
| 21 |  |  |  |  |
| 22 |  |  |  |  |
| 23 |  |  |  |  |
| 24 |  |  |  |  |
| 25 |  |  |  |  |
| 26 |  |  |  |  |
| 27 |  |  |  |  |
| 28 |  |  |  |  |
| 29 |  |  |  |  |
| 30 |  |  |  |  |
| 31 |  |  |  |  |
| 32 |  |  |  |  |
| 33 |  |  |  |  |
| 34 |  |  |  |  |
| 35 |  |  |  |  |
| 36 |  |  |  |  |
| 37 |  |  |  |  |
| 38 |  |  |  |  |
| 39 |  |  |  |  |
| 40 |  |  |  |  |
| 41 |  |  |  |  |
| 42 |  |  |  |  |
| 43 |  |  |  |  |
| 44 |  |  |  |  |
| 45 |  |  |  |  |
| 46 |  |  |  |  |
| 47 |  |  |  |  |
| 48 |  |  |  |  |
| 49 |  |  |  |  |
| 50 |  |  |  |  |
| 51 |  |  |  |  |
| 52 |  |  |  |  |
| 53 |  |  |  |  |
| 54 |  |  |  |  |
| 55 |  |  |  |  |
| 56 |  |  |  |  |
| 57 |  |  |  |  |
| 58 |  |  |  |  |
| 59 |  |  |  |  |
| 60 |  |  |  |  |

1  
2  
3 4.21. Die Reduct-Web-App liefert  
4 Informationen zum Thema  
5 Datenschutz.

6 1 2 3 4

7  
8  
9  
10 4.22. Die Reduct-Web-App liefert  
11 Informationen über  
12 Sicherheitsrichtlinien in Bezug auf  
13 persönliche Gesundheitsinformationen.

14 1 2 3 4

15  
16  
17  
18 4.23. Die Reduct-Web-App erklärte das  
19 Sicherheitssystem zur Schaffung einer  
20 sicheren Umgebung für eine bessere  
21 Nutzung der mobilen App.

22 1 2 3 4

23  
24  
25  
26  
27  
28 **4. Allgemeine Fragen**

29  
30  
31  
32 **4.1. Fanden Sie die visuelle Darstellung der Module in der Reduct-Web-App ansprechend?**

33  
34  
35  
36  
37

38  
39 1 2 3 4 5

40  
41 überhaupt nicht eher weniger mäßig eher sehr  
42 ansprechend ansprechend ansprechend ansprechend ansprechend

43  
44  
45  
46  
47  
48  
49 **4.2. Waren die Texte klar und verständlich?**

50  
51  
52

53  
54 1 2 3 4 5

55  
56 gar nicht eher nicht mäßig eher sehr  
57 verständlich verständlich verständlich verständlich verständlich



1  
2  
3  
4  
5  
6  
7  
8  
9  
10  
11  
12  
13  
14  
15  
16  
17  
18  
19  
20  
21  
22  
23  
24  
25  
26  
27  
28  
29  
30  
31  
32  
33  
34  
35  
36  
37  
38  
39  
40  
41  
42  
43  
44  
45  
46  
47  
48  
49  
50  
51  
52  
53  
54  
55  
56  
57  
58  
59  
60

#### 4.3 Fanden Sie die Videos ansprechend?

|                              |                          |                          |                          |                          |                              |
|------------------------------|--------------------------|--------------------------|--------------------------|--------------------------|------------------------------|
| <input type="checkbox"/>     | <input type="checkbox"/> | <input type="checkbox"/> | <input type="checkbox"/> | <input type="checkbox"/> | <input type="checkbox"/>     |
| 1                            | 2                        | 3                        | 4                        | 5                        | 6                            |
| überhaupt nicht<br>hilfreich | kaum hilfreich           | mäßig hilfreich          | eher hilfreich           | sehr hilfreich           | Kann ich nicht<br>beurteilen |

#### 4.4. Fanden Sie die Audio-Dateien ansprechend?

|                                |                             |                          |                          |                          |                              |
|--------------------------------|-----------------------------|--------------------------|--------------------------|--------------------------|------------------------------|
| <input type="checkbox"/>       | <input type="checkbox"/>    | <input type="checkbox"/> | <input type="checkbox"/> | <input type="checkbox"/> | <input type="checkbox"/>     |
| 1                              | 2                           | 3                        | 4                        | 5                        | 6                            |
| überhaupt nicht<br>ansprechend | eher weniger<br>ansprechend | mäßig<br>ansprechend     | eher<br>ansprechend      | sehr ansprechend         | Kann ich nicht<br>beurteilen |

#### 4.5. Fanden Sie die Belohnungen ansprechend?

|                                |                             |                          |                          |                          |                              |
|--------------------------------|-----------------------------|--------------------------|--------------------------|--------------------------|------------------------------|
| <input type="checkbox"/>       | <input type="checkbox"/>    | <input type="checkbox"/> | <input type="checkbox"/> | <input type="checkbox"/> | <input type="checkbox"/>     |
| 1                              | 2                           | 3                        | 4                        | 5                        | 6                            |
| überhaupt nicht<br>ansprechend | eher weniger<br>ansprechend | mäßig<br>ansprechend     | eher<br>ansprechend      | sehr ansprechend         | Kann ich nicht<br>beurteilen |

#### 4.6. Fanden Sie die Übungen hilfreich?

|                              |                          |                          |                          |                          |                              |
|------------------------------|--------------------------|--------------------------|--------------------------|--------------------------|------------------------------|
| <input type="checkbox"/>     | <input type="checkbox"/> | <input type="checkbox"/> | <input type="checkbox"/> | <input type="checkbox"/> | <input type="checkbox"/>     |
| 1                            | 2                        | 3                        | 4                        | 5                        | 6                            |
| überhaupt nicht<br>hilfreich | kaum hilfreich           | mäßig hilfreich          | eher hilfreich           | sehr hilfreich           | Kann ich nicht<br>beurteilen |

**4.7. Sind Sie mit der Plattform „Reduct-Web-App“ zufrieden?**

1 2 3 4 5

überhaupt nicht zufrieden Kaum zufrieden mäßig zufrieden Eher zufrieden Sehr zufrieden

**4.8. Hat die Plattform dir Sicherheit im Umgang mit deinen persönlichen Daten vermittelt?**

1 2 3 4 5

überhaupt nicht zutreffend eher weniger zutreffend mäßig zutreffend eher zutreffend sehr zutreffend

**4.9. Würden Sie die Reduct-Web-App an andere Betroffene weiterempfehlen?**

ja  nein

**4.10. Würden Sie die Reduct-Web-App zukünftig nutzen?**

ja  nein

**4.11. Inwiefern denken Sie, dass Sie persönlich von unserer Reduct-Web-App profitiert haben?**

1 2 3 4 5

überhaupt nicht kaum mäßig eher Sehr

1  
2  
3  
4  
5  
6  
7  
8  
9  
10  
11  
12  
13  
14  
15  
16  
17  
18  
19  
20  
21  
22  
23  
24  
25  
26  
27  
28  
29  
30  
31  
32  
33  
34  
35  
36  
37  
38  
39  
40  
41  
42  
43  
44  
45  
46  
47  
48  
49  
50  
51  
52  
53  
54  
55  
56  
57  
58  
59  
60

**4.12. Wurden Sie durch die Plattform „Reduct-Web-App“ motiviert, dass Training weiterzuführen?**

|                              |                           |                          |                          |                          |
|------------------------------|---------------------------|--------------------------|--------------------------|--------------------------|
| <input type="checkbox"/>     | <input type="checkbox"/>  | <input type="checkbox"/> | <input type="checkbox"/> | <input type="checkbox"/> |
| 1                            | 2                         | 3                        | 4                        | 5                        |
| Trifft überhaupt<br>nicht zu | Trifft eher<br>weniger zu | Trifft mäßig zu          | Trifft eher zu           | Trifft vollkommen<br>zu  |

**4.13. Konnten Sie die Nutzung der Reduct-Web-App gut in Ihren Alltag einbauen?**

|                          |                          |                          |                          |                          |
|--------------------------|--------------------------|--------------------------|--------------------------|--------------------------|
| <input type="checkbox"/> |
| überhaupt nicht<br>gut   | Weniger gut              | mäßig                    | Eher gut                 | Sehr gut                 |

**4.14. Konnten Sie sich gut auf die Inhalte konzentrieren, wenn Sie das Training genutzt haben?**

|                              |                           |                           |                          |                          |
|------------------------------|---------------------------|---------------------------|--------------------------|--------------------------|
| <input type="checkbox"/>     | <input type="checkbox"/>  | <input type="checkbox"/>  | <input type="checkbox"/> | <input type="checkbox"/> |
| 1                            | 2                         | 3                         | 4                        | 5                        |
| Trifft überhaupt<br>nicht zu | Trifft eher<br>weniger zu | Trifft teilweise zu<br>zu | Trifft eher zu           | Trifft vollkommen<br>zu  |

**5.15. Hat Ihnen die Reduct-Web-App dabei geholfen mit krankheitsbezogenen Belastungen besser umzugehen?**

|                              |                           |                           |                          |                          |
|------------------------------|---------------------------|---------------------------|--------------------------|--------------------------|
| <input type="checkbox"/>     | <input type="checkbox"/>  | <input type="checkbox"/>  | <input type="checkbox"/> | <input type="checkbox"/> |
| 1                            | 2                         | 3                         | 4                        | 5                        |
| Trifft überhaupt<br>nicht zu | Trifft eher<br>weniger zu | Trifft teilweise zu<br>zu | Trifft eher zu           | Trifft vollkommen<br>zu  |

4.16. Geben Sie hierunter an, inwieweit Sie das jeweilige in der Reduct-Web-App behandelte Thema als für Sie persönlich relevant im Umgang mit Ihrer Krebserkrankung empfunden haben.

|                                | Überhaupt<br>nicht<br>relevant | Wenig<br>relevant | Mäßig<br>relevant | Eher<br>relevant | Sehr<br>relevant | Kann ich<br>nicht<br>beurteilen |
|--------------------------------|--------------------------------|-------------------|-------------------|------------------|------------------|---------------------------------|
| Gesundheitsbezogenes Verhalten | 1                              | 2                 | 3                 | 4                | 5                | 6                               |
| Gefühle                        | 1                              | 2                 | 3                 | 4                | 5                | 6                               |
| Kreativität                    | 1                              | 2                 | 3                 | 4                | 5                | 6                               |
| Schmerzerleben                 | 1                              | 2                 | 3                 | 4                | 5                | 6                               |
| Angst                          | 1                              | 2                 | 3                 | 4                | 5                | 6                               |
| Kraftquellen                   | 1                              | 2                 | 3                 | 4                | 5                | 6                               |
| Positivität                    | 1                              | 2                 | 3                 | 4                | 5                | 6                               |
| Körpergefühl                   | 1                              | 2                 | 3                 | 4                | 5                | 6                               |
| Bewegung und Entspannung       | 1                              | 2                 | 3                 | 4                | 5                | 6                               |
| Stressmanagement               | 1                              | 2                 | 3                 | 4                | 5                | 6                               |
| Schlaf                         | 1                              | 2                 | 3                 | 4                | 5                | 6                               |
| Selbstzuwendung                | 1                              | 2                 | 3                 | 4                | 5                | 6                               |
| Beziehungen                    | 1                              | 2                 | 3                 | 4                | 5                | 6                               |

4.17 Beschreiben Sie kurz in Ihren eigenen Worten, inwiefern die Reduct-Web-App Ihnen im Umgang mit den Belastungen im Rahmen Ihrer Krebserkrankung geholfen hat.

**III. Fragen zur Beschäftigung mit Achtsamkeit und der Reduct-Web-App**

**1) Bitte geben Sie an, wie häufig Sie während der Laufzeit der Reduct-Web-App Achtsamkeitsübungen in Ihren Alltag eingebaut haben.**

|                          |                          |                          |                            |                          |                          |
|--------------------------|--------------------------|--------------------------|----------------------------|--------------------------|--------------------------|
| <input type="checkbox"/> | <input type="checkbox"/> | <input type="checkbox"/> | <input type="checkbox"/>   | <input type="checkbox"/> | <input type="checkbox"/> |
| 1                        | 2                        | 3                        | 4                          | 5                        | 6                        |
| (fast) nie               | Ca. einmal im<br>Monat   | Mehrmals im<br>Monat     | Ca. einmal in<br>der Woche | Mehrmals in<br>der Woche | (fast) täglich           |

**2) Konnten Sie die in der Reduct-Web-App erlernten Strategien/Skills in Ihren Alltag integrieren?**

|                          |                          |                          |                            |                          |                          |
|--------------------------|--------------------------|--------------------------|----------------------------|--------------------------|--------------------------|
| <input type="checkbox"/> | <input type="checkbox"/> | <input type="checkbox"/> | <input type="checkbox"/>   | <input type="checkbox"/> | <input type="checkbox"/> |
| 1                        | 2                        | 3                        | 4                          | 5                        | 6                        |
| (fast) nie               | Ca. einmal im<br>Monat   | Mehrmals im<br>Monat     | Ca. einmal in<br>der Woche | Mehrmals in<br>der Woche | (fast) täglich           |

**IV Fragen zur psychotherapeutischen/psychopharmakologischen Behandlung****1) Nehmen Sie aktuell Medikamente gegen Ängste, Depression oder Schlafstörungen ein?** Nein Ja, folgende: \_\_\_\_\_

Dosis \_\_\_\_\_

Seit wann? \_\_\_\_\_

**2) Sind Sie aktuell in psychotherapeutischer/psychiatrischer Behandlung?** Nein Ja

Wie viele Sitzungen haben stattgefunden? \_\_\_\_\_ Sitzungen

**3) Haben Sie in den letzten vier Monaten regelmäßige (mindestens 1x pro Woche, für mindestens 4 Wochen) psychoonkologische Termine in der Klinik, bei einem ambulanten PsychoonkologIn, oder in einer Krebsberatungsstelle gehabt?** Nein Ja

1  
2  
3  
4  
5  
6  
7  
8  
9  
10  
11  
12  
13  
14  
15  
16 Liebe Teilnehmerin, lieber Teilnehmer,

17  
18 vielen Dank für Ihre Teilnahme an der zweiten Befragung. Wir würden uns freuen, wenn Sie  
19 weiterhin an unserer Studie teilnehmen, indem Sie zwei weitere Fragebögen bearbeiten. Hierzu  
20 werden wir Sie in jeweils 3 und 6 Monaten benachrichtigen. Die Bearbeitung wird deutlich weniger  
21 Zeit in Anspruch nehmen, als die Bearbeitung der ersten beiden Fragebögen.  
22

23  
24 Sollten Sie Fragen haben, können Sie gerne jederzeit eine E-Mail an [reduct@uni-due.de](mailto:reduct@uni-due.de) senden.

25  
26 Auf diesem Wege wünschen wir Ihnen weiterhin alles Gute.

27  
28 Ihr Reduct Team  
29  
30  
31  
32  
33  
34  
35  
36  
37  
38  
39  
40  
41  
42  
43  
44  
45  
46  
47  
48  
49  
50  
51  
52  
53  
54  
55  
56  
57  
58  
59  
60

Teilnehmer-ID: \_\_\_\_\_

# Reduct- Web-Basierte Achtsamkeits- und Skillsbasierte Stressreduktion für Patientinnen und Patienten mit Krebs

Liebe Teilnehmerin, lieber Teilnehmer,

willkommen zurück! Mittlerweile sind einige Wochen vergangen, seitdem Sie die Reduct-Web-App genutzt haben. Wir hoffen, dass Sie die Inhalte des online Trainings weiterhin in Ihrem Alltag begleiten. Vielleicht haben Sie diese immer mal wieder hilfreich erlebt oder sind seitdem achtsamer in Ihrem Alltag. Dies ist der vorletzte Fragebogen, Sie werden etwa 10-15 Minuten zur Bearbeitung benötigen.

Sollten Sie Fragen haben, können Sie gerne jederzeit eine E-Mail an [reduct@uni-due.de](mailto:reduct@uni-due.de) senden.

Wenn Sie merken, dass Sie sich sehr belastet fühlen und Sie mehr Unterstützung bei der Bewältigung Ihrer Erkrankung benötigen, können Sie sich jederzeit an die/den Studienverantwortliche/n Ihres Zentrums wenden. Diese/r kann Ihnen bei der Suche psychoonkologischer Hilfsangebote zur Seite stehen.

Vielen Dank für Ihre Teilnahme und Unterstützung!

Ihr Reduct Team

\*Kontaktdaten

[2]



## I. Fragen zu Ihrem derzeitigen Befinden

### 1. Angst und Stresserleben

Bitte beantworten Sie im Folgenden, wie sehr die jeweilige Aussage in der letzten Woche auf Sie zutraf.

- |                                                                                           |                                                                     |
|-------------------------------------------------------------------------------------------|---------------------------------------------------------------------|
| 1.1. Ich fühle mich angespannt oder überreizt.                                            | 1.2. Ich fühle mich in meinen Aktivitäten gebremst.                 |
| 3 meistens                                                                                | 3 fast immer                                                        |
| 2 oft                                                                                     | 2 sehr oft                                                          |
| 1 von Zeit zu Zeit/ gelegentlich                                                          | 1 manchmal                                                          |
| 0 überhaupt nicht                                                                         | 0 überhaupt nicht                                                   |
| 1.3. Ich kann mich heute noch so freuen wie früher.                                       | 1.4. Ich habe manchmal ein ängstliches Gefühl in der Magengegend.   |
| 0 ganz genau so                                                                           | 0 überhaupt nicht                                                   |
| 1 nicht ganz so sehr                                                                      | 1 gelegentlich                                                      |
| 2 Nur noch ein wenig                                                                      | 2 ziemlich oft                                                      |
| 3 kaum oder gar nicht                                                                     | 3 sehr oft                                                          |
| 1.5. Mich überkommt eine ängstliche Vorahnung, dass etwas Schreckliches passieren könnte. | 1.6. Ich habe das Interesse an meiner äußeren Erscheinung verloren. |
| 3 ja, sehr stark                                                                          | 3 ja, stimmt genau                                                  |
| 2 ja, aber nicht allzu stark                                                              | 2 ich kümmere mich nicht so sehr darum, wie ich sollte              |
| 1 etwas, aber es macht mir keine Sorgen                                                   | 1 möglicherweise kümmere ich mich zu wenig darum                    |
| 0 überhaupt nicht                                                                         | 0 ich kümmere mich so viel darum wie immer                          |
| 1.7. Ich kann lachen und die lustige Seite der Dinge sehen.                               | 1.8. Ich fühle mich rastlos, muss immer in Bewegung sein.           |
| 0 ja, so viel wie immer                                                                   | 3 ja, tatsächlich sehr                                              |
| 1 nicht mehr ganz so viel                                                                 | 2 ziemlich                                                          |
| 2 inzwischen viel weniger                                                                 | 1 nicht sehr                                                        |
| 3 überhaupt nicht                                                                         | 0 überhaupt nicht                                                   |

1.9. Mir gehen beunruhigende Gedanken durch den Kopf.

- 3 einen Großteil der Zeit
- 2 verhältnismäßig oft
- 1 von Zeit zu Zeit, aber nicht allzu oft
- 0 nur gelegentlich/nie

1.10. Ich blicke mit Freude in die Zukunft.

- 0 ja, sehr
- 1 eher weniger als früher
- 2 viel weniger als früher
- 3 kaum bis gar nicht

1.11. Ich fühle mich glücklich.

- 3 überhaupt nicht
- 2 selten
- 1 manchmal
- 0 meistens

1.12. Mich überkommt plötzlich ein panikartiger Zustand.

- 3 ja, tatsächlich sehr oft
- 2 ziemlich oft
- 1 nicht sehr oft
- 0 überhaupt nicht

1.13. Ich kann behaglich dasitzen und mich entspannen.

- 0 ja, natürlich
- 1 gewöhnlich schon
- 2 nicht oft
- 3 überhaupt nicht

1.14. Ich kann mich an einem guten Buch, einer Radio- oder Fernsehsendung erfreuen.

- 0 oft
- 1 manchmal
- 2 Eher selten
- 3 Sehr selten

## 2. Belastungsthermometer

Bitte markieren Sie am Thermometer die Zahl, die am besten beschreibt, wie belastet Sie sich in der letzten Woche einschließlich heute gefühlt haben.

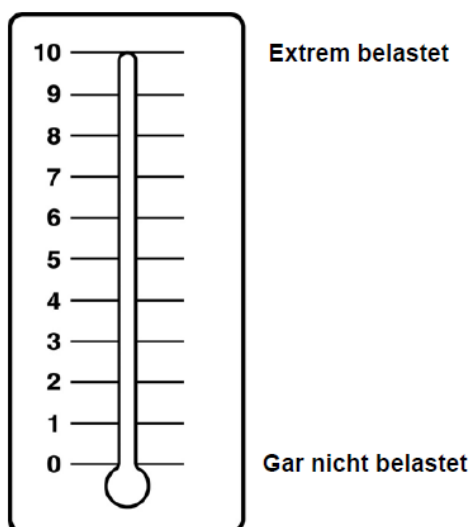

### 3. Skala zur Allgemeinen Selbstwirksamkeitserwartung

Kreuzen Sie bitte bei jeder Frage die Antwort an, die am besten auf Sie zutrifft.

|                                                                                                    | Stimmt<br>nicht | Stimmt<br>kaum | Stimmt<br>eher | Stimmt<br>genau |
|----------------------------------------------------------------------------------------------------|-----------------|----------------|----------------|-----------------|
| 3.1. Wenn sich Widerstände auftun, finde ich Mittel und Wege, mich durchzusetzen.                  | 1               | 2              | 3              | 4               |
| 3.2. Die Lösung schwieriger Probleme gelingt mir immer, wenn ich mich darum bemühe.                | 1               | 2              | 3              | 4               |
| 3.3. Es bereitet mir keine Schwierigkeiten, meine Absichten und Ziele zu verwirklichen.            | 1               | 2              | 3              | 4               |
| 3.4. In unerwarteten Situationen weiß ich immer, wie ich mich verhalten soll.                      | 1               | 2              | 3              | 4               |
| 3.5. Auch bei überraschenden Ereignissen glaube ich, dass ich gut mit ihnen zurechtkommen kann.    | 1               | 2              | 3              | 4               |
| 3.6. Schwierigkeiten sehe ich gelassen entgegen, weil ich meinen Fähigkeiten immer vertrauen kann. | 1               | 2              | 3              | 4               |
| 3.7. Was auch immer passiert, ich werde schon klarkommen.                                          | 1               | 2              | 3              | 4               |
| 3.8. Für jedes Problem kann ich eine Lösung finden.                                                | 1               | 2              | 3              | 4               |
| 3.9. Wenn eine neue Sache auf mich zukommt, weiß ich, wie ich damit umgehen kann.                  | 1               | 2              | 3              | 4               |
| 3.10. Wenn ein Problem auftaucht, kann ich es aus eigener Kraft meistern.                          | 1               | 2              | 3              | 4               |

#### 4. Lebensqualität (EORT-QLQ-C30)

Bitte kreuzen Sie im Folgenden Abschnitt die Zahl von 1 bis 4 an, die am besten auf Sie zutrifft.

|                                                                                                                                      | Überhaupt<br>nicht | Wenig | Mäßig | Sehr |
|--------------------------------------------------------------------------------------------------------------------------------------|--------------------|-------|-------|------|
| 4.1. Bereitet es Ihnen Schwierigkeiten, sich körperlich anzustrengen (z.B. eine schwere Einkaufstasche oder einen Koffer zu tragen)? | 1                  | 2     | 3     | 4    |
| 4.2. Bereitet es Ihnen Schwierigkeiten, einen <u>längeren</u> Spaziergang zu machen?                                                 | 1                  | 2     | 3     | 4    |
| 4.3. Bereitet es Ihnen Schwierigkeiten, eine <u>kurze</u> Strecke außer Haus zu gehen?                                               | 1                  | 2     | 3     | 4    |
| 4.4. Müssen Sie tagsüber im Bett liegen oder in einem Sessel sitzen?                                                                 | 1                  | 2     | 3     | 4    |
| 4.5. Brauchen Sie Hilfe beim Essen, Anziehen, Waschen oder Benutzen der Toilette?                                                    | 1                  | 2     | 3     | 4    |
| <b>Während der letzten Woche:</b>                                                                                                    |                    |       |       |      |
|                                                                                                                                      | Überhaupt<br>nicht | Wenig | Mäßig | Sehr |
| 4.6. Waren Sie bei Ihrer Arbeit oder bei anderen tagtäglichen Beschäftigungen eingeschränkt?                                         | 1                  | 2     | 3     | 4    |
| 4.7. Waren Sie bei Ihren Hobbys oder andere Freizeitbeschäftigungen eingeschränkt?                                                   | 1                  | 2     | 3     | 4    |
| 4.8. Waren Sie kurzatmig?                                                                                                            | 1                  | 2     | 3     | 4    |
| 4.9. Hatten Sie Schmerzen?                                                                                                           | 1                  | 2     | 3     | 4    |
| 4.10. Mussten Sie sich ausruhen?                                                                                                     | 1                  | 2     | 3     | 4    |
| 4.11. Hatten Sie Schlafstörungen?                                                                                                    | 1                  | 2     | 3     | 4    |

1  
2  
3 4.12. Fühlten Sie sich schwach?

4 1 2 3 4  
5  
6  
7

8 **Während der letzten Woche:**

**Überhaupt  
nicht**

**Wenig**

**Mäßig**

**Sehr**

9  
10  
11 4.13. Hatten Sie Appetitmangel?

12 1 2 3 4  
13

14 4.14. War Ihnen übel?

15 1 2 3 4  
16

17 4.15. Haben Sie erbrochen?

18 1 2 3 4  
19

20 4.16. Hatten Sie Verstopfung?

21 1 2 3 4  
22

23 4.17. Hatten Sie Durchfall?

24 1 2 3 4  
25

26 4.18. Waren Sie müde?

27 1 2 3 4  
28

29 4.19. Fühlten Sie sich durch  
30 Schmerzen in Ihrem alltäglichen  
31 Leben beeinträchtigt?

32 1 2 3 4  
33

34 4.20. Hatten Sie Schwierigkeiten, sich  
35 auf etwas zu konzentrieren, z.B. auf  
36 das Zeitungslesen oder das  
37 Fernsehen?

38 1 2 3 4  
39

40 4.21. Fühlten Sie sich angespannt?

41 1 2 3 4  
42

43 4.22. Haben Sie sich Sorgen  
44 gemacht?

45 1 2 3 4  
46

47 4.23. Waren Sie reizbar?

48 1 2 3 4  
49

50 4.24. Fühlten Sie sich  
51 niedergeschlagen?

52 1 2 3 4  
53

54 4.25. Hatten Sie Schwierigkeiten, sich  
55 an Dinge zu erinnern?

56 1 2 3 4  
57

58 4.26. Hat Ihr körperlicher Zustand  
59 oder Ihre medizinische Behandlung  
60 Ihr Familienleben beeinträchtigt?

1 2 3 4

1  
2  
3 4.27. Hat Ihr körperlicher Zustand 1 2 3 4  
4 oder Ihre medizinische Behandlung  
5 Ihr Zusammensein oder Ihre  
6 gemeinsamen Unternehmungen mit  
7 anderen Menschen beeinträchtigt?  
8

9  
10  
11 4.28. Hat Ihr körperlicher Zustand 1 2 3 4  
12 oder Ihre medizinische Behandlung  
13 für Sie finanzielle Schwierigkeiten mit  
14 sich gebracht?  
15  
16

17  
18  
19 **Bitte kreuzen Sie bei den folgenden Fragen die Zahl zwischen 1 und 7 an, die am besten auf Sie**  
20 **zutrifft.**

21  
22 4.29. Wie würden Sie insgesamt Ihren Gesundheitszustand während der letzten Woche  
23 einschätzen?

24  
25 1 2 3 4 5 6 7  
26  
27 sehr ausgezeichnet  
28 schlecht

29  
30 4.30. Wie würden Sie insgesamt Ihre Lebensqualität während der letzten Woche einschätzen?

31  
32 1 2 3 4 5 6 7  
33  
34 sehr ausgezeichnet  
35 schlecht  
36  
37  
38  
39  
40  
41  
42  
43  
44  
45  
46  
47  
48  
49  
50  
51  
52  
53  
54  
55  
56  
57  
58  
59  
60

## 5. Lebensqualität (EQ-5D-5L)

Bitte kreuzen Sie unter jeder Überschrift das Kästchen an, das Ihren Gesundheitszustand heute am besten beschreibt.

### 5.1. Beweglichkeit/Mobilität

- |                                         |   |
|-----------------------------------------|---|
| Ich habe keine Probleme herumzugehen    | 1 |
| Ich habe leichte Probleme herumzugehen  | 2 |
| Ich habe mäßige Probleme herumzugehen   | 3 |
| Ich habe große Probleme herumzugehen    | 4 |
| Ich bin nicht in der Lage, herumzugehen | 5 |

### 5.2. Für sich selbst sorgen

- |                                                                   |   |
|-------------------------------------------------------------------|---|
| Ich habe keine Probleme, mich selbst zu waschen oder anzuziehen   | 1 |
| Ich habe leichte Probleme, mich selbst zu waschen oder anzuziehen | 2 |
| Ich habe mäßige Probleme, mich selbst zu waschen oder anzuziehen  | 3 |
| Ich habe große Probleme, mich selbst zu waschen oder anzuziehen   | 4 |
| Ich bin nicht in der Lage, mich selbst zu waschen oder anzuziehen | 5 |

### 5.3. Alltägliche Tätigkeiten (z.B. Arbeit, Studium, Hausarbeit, Familien- oder Freizeitaktivitäten)

- |                                                                        |   |
|------------------------------------------------------------------------|---|
| Ich habe keine Probleme, meinen alltäglichen Tätigkeiten nachzugehen   | 1 |
| Ich habe leichte Probleme, meinen alltäglichen Tätigkeiten nachzugehen | 2 |
| Ich habe mäßige Probleme, meinen alltäglichen Tätigkeiten nachzugehen  | 3 |
| Ich habe große Probleme, meinen alltäglichen Tätigkeiten nachzugehen   | 4 |
| Ich bin nicht in der Lage, meinen alltäglichen Tätigkeiten nachzugehen | 5 |

**5.4. Schmerzen/Körperliche Beschwerden**

|                                             |   |
|---------------------------------------------|---|
| Ich habe keine Schmerzen oder Beschwerden   | 1 |
| Ich habe leichte Schmerzen oder Beschwerden | 2 |
| Ich habe mäßige Schmerzen oder Beschwerden  | 3 |
| Ich habe starke Schmerzen oder Beschwerden  | 4 |
| Ich habe extreme Schmerzen oder Beschwerden | 5 |

**5.5. Angst/Niedergeschlagenheit**

|                                             |   |
|---------------------------------------------|---|
| Ich bin nicht ängstlich oder deprimiert     | 1 |
| Ich bin ein wenig ängstlich oder deprimiert | 2 |
| Ich bin mäßig ängstlich oder deprimiert     | 3 |
| Ich bin sehr ängstlich oder deprimiert      | 4 |
| Ich bin extrem ängstlich oder deprimiert    | 5 |



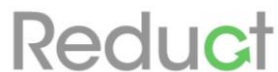

5.6 Um Sie bei der Einschätzung, wie gut oder wie schlecht Ihr Gesundheitszustand ist, zu unterstützen, haben wir eine Skala gezeichnet, ähnlich einem Thermometer. Der best denkbare Gesundheitszustand ist mit einer "100" gekennzeichnet, der schlechteste mit "0".

Wir möchten Sie nun bitten, auf dieser Skala zu kennzeichnen, wie gut oder schlecht Ihrer Ansicht nach Ihr persönlicher Gesundheitszustand heute ist. Bitte verbinden Sie dazu den untenstehenden Kasten mit dem Punkt auf der Skala, der Ihren heutigen Gesundheitszustand am besten wiedergibt.

**Ihr heutiger  
Gesundheitszustand**

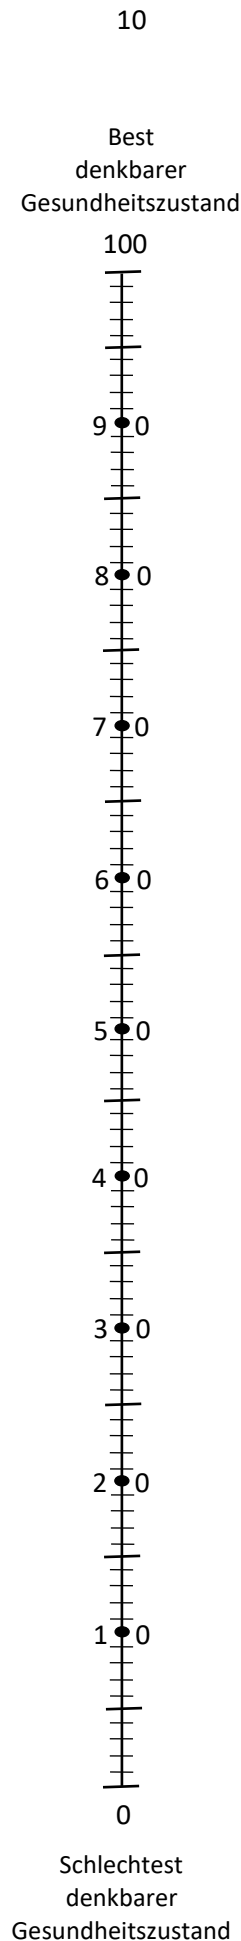

## 6. Achtsamkeit (FFA)

Dieser Fragebogen soll Ihre Achtsamkeit erfassen. Bitte beziehen Sie dabei die Aussagen auf die letzten 14 Tage. Kreuzen Sie bitte bei jeder Frage die Antwort an, die am besten auf Sie zutrifft.

|                                                                                                             | Fast<br>nie | Eher selten | Relativ<br>oft | Fast<br>immer |
|-------------------------------------------------------------------------------------------------------------|-------------|-------------|----------------|---------------|
| 6.1. Ich bin offen für die Erfahrung des Augenblicks.                                                       | 1           | 2           | 3              | 4             |
| 6.2. Ich spüre in meinen Körper hinein, sei es beim Essen, Kochen, Putzen, Reden.                           | 1           | 2           | 3              | 4             |
| 6.3. Wenn ich merke, dass ich abwesend war, kehre ich sanft zur Erfahrung des Augenblicks zurück.           | 1           | 2           | 3              | 4             |
| 6.4. Ich kann mich selbst wertschätzen.                                                                     | 1           | 2           | 3              | 4             |
| 6.5. Ich achte auf die Motive meiner Handlungen.                                                            | 1           | 2           | 3              | 4             |
| 6.6. Ich sehe meine Fehler und Schwierigkeiten, ohne mich zu verurteilen.                                   | 1           | 2           | 3              | 4             |
| 6.7. Ich bin in Kontakt mit meinen Erfahrungen, hier und jetzt.                                             | 1           | 2           | 3              | 4             |
| 6.8. Ich nehme unangenehme Erfahrungen an.                                                                  | 1           | 2           | 3              | 4             |
| 6.9. Ich bin mir selbst gegenüber freundlich, wenn Dinge schief laufen.                                     | 1           | 2           | 3              | 4             |
| 6.10. Ich beobachte meine Gefühle, ohne mich in ihnen zu verlieren.                                         | 1           | 2           | 3              | 4             |
| 6.11. In schwierigen Situationen kann ich innehalten.                                                       | 1           | 2           | 3              | 4             |
| 6.12. Ich erlebe Momente innerer Ruhe und Gelassenheit, selbst wenn äußerlich Schmerzen und Unruhe da sind. | 1           | 2           | 3              | 4             |
| 6.13. Ich bin ungeduldig mit mir und meinen Mitmenschen.                                                    | 4           | 3           | 2              | 1             |
| 6.14. Ich kann darüber lächeln, wenn ich sehe, wie ich mir manchmal das Leben schwer mache.                 | 1           | 2           | 3              | 4             |

7. Wie oft fühlten Sie sich im Verlauf der letzten 2 Wochen durch die folgenden Beschwerden beeinträchtigt? (PHQ-4)

|                                                                      | Überhaupt nicht | An einzelnen Tagen | An mehr als der Hälfte der Tage | Beinahe jeden Tag |
|----------------------------------------------------------------------|-----------------|--------------------|---------------------------------|-------------------|
| 7.1. Wenig Interesse oder Freude an Ihren Tätigkeiten                | 0               | 1                  | 2                               | 3                 |
| 7.2. Niedergeschlagenheit, Schwermut oder Hoffnungslosigkeit         | 0               | 1                  | 2                               | 3                 |
| 7.3. Nervosität, Ängstlichkeit oder Anspannung                       | 0               | 1                  | 2                               | 3                 |
| 7.4. Nicht in der Lage sein, Sorgen zu stoppen oder zu kontrollieren | 0               | 1                  | 2                               | 3                 |

## 8. Skills

Kreuzen Sie bitte bei jeder Frage die Antwort an, die am besten auf Sie zutrifft.

|                                                                                                               | Stimmt<br>überhaupt<br>nicht | 1 | 2 | Neutral | 3 | 4 | Stimmt<br>voll-<br>kommen | 5 |
|---------------------------------------------------------------------------------------------------------------|------------------------------|---|---|---------|---|---|---------------------------|---|
| 8.1. In belastenden Situationen kann ich mich aufmuntern, indem ich meine Gedanken auf positive Dinge richte. | 1                            | 2 | 3 | 4       | 5 |   |                           |   |
| 8.2. Meine Gedanken geben mir im Umgang mit stressigen Situationen Kraft.                                     | 1                            | 2 | 3 | 4       | 5 |   |                           |   |
| 8.3. Wenn ich belastende Gefühle verspüre, lasse ich sie zu.                                                  | 1                            | 2 | 3 | 4       | 5 |   |                           |   |
| 8.4. Ich kann Dinge annehmen, die ich nicht ändern kann.                                                      | 1                            | 2 | 3 | 4       | 5 |   |                           |   |
| 8.5. Ich überlege mir, was ich im Umgang mit der Krebserkrankung tun kann.                                    | 1                            | 2 | 3 | 4       | 5 |   |                           |   |
| 8.6. Ich führe oft bestimmte Aktivitäten aus, um auf andere Gedanken zu kommen.                               | 1                            | 2 | 3 | 4       | 5 |   |                           |   |
| 8.7. Ich kann mir wohlwollend begegnen.                                                                       | 1                            | 2 | 3 | 4       | 5 |   |                           |   |
| 8.8. Ich kann gut für mich sorgen.                                                                            | 1                            | 2 | 3 | 4       | 5 |   |                           |   |
| 8.9. Ich suche Kontakt zu liebevollen Menschen.                                                               | 1                            | 2 | 3 | 4       | 5 |   |                           |   |
| 8.10. Ich kann nach Unterstützung suchen.                                                                     | 1                            | 2 | 3 | 4       | 5 |   |                           |   |

## II. Achtsamkeit und Nutzung der Reduct-Web-App in der Zwischenzeit

1) Bitte geben Sie an, wie häufig Sie seit der Bearbeitung des letzten Fragebogens bzw. der Reduct-Web-App Achtsamkeitsübungen in Ihren Alltag eingebaut haben.

|                          |                          |                          |                          |                          |                          |
|--------------------------|--------------------------|--------------------------|--------------------------|--------------------------|--------------------------|
| <input type="checkbox"/> |
| 1                        | 2                        | 3                        | 4                        | 5                        | 6                        |
| (fast) nie               | Ca. einmal im Monat      | Mehrmals im Monat        | Ca. einmal in der Woche  | Mehrmals in der Woche    | (fast) täglich           |

2) Konnten Sie die erlernten Strategien/Skills in Ihren Alltag integrieren?

|                          |                          |                          |                          |                          |                          |
|--------------------------|--------------------------|--------------------------|--------------------------|--------------------------|--------------------------|
| <input type="checkbox"/> |
| 1                        | 2                        | 3                        | 4                        | 5                        | 6                        |
| (fast) nie               | Ca. einmal im Monat      | Mehrmals im Monat        | Ca. einmal in der Woche  | Mehrmals in der Woche    | (fast) täglich           |

3) Haben Ihnen die Inhalte der Reduct-Web-App dabei geholfen, mit krankheitsbezogenen Belastungen besser umzugehen?

|                           |                          |                          |                          |                          |
|---------------------------|--------------------------|--------------------------|--------------------------|--------------------------|
| <input type="checkbox"/>  | <input type="checkbox"/> | <input type="checkbox"/> | <input type="checkbox"/> | <input type="checkbox"/> |
| 1                         | 2                        | 3                        | 4                        | 5                        |
| Trifft überhaupt nicht zu | Trifft eher weniger zu   | Trifft teilweise zu      | Trifft eher zu           | Trifft vollkommen zu     |

### III. Gesundheitsökonomische Fragen

#### 1. Lag bei Ihnen innerhalb der letzten 3 Monate eine Arbeitsunfähigkeit (AU) vor?

nein

ja

wenn ja, bitte geben Sie den Zeitraum jeder AU mit Datum an und fassen dabei die Dauer für jede zusammenhängende AU (Folgebescheinigungen) wegen derselben Erkrankung zusammen.

1. AU: von \_\_.\_\_.\_\_\_\_(TT.MM.JJJJ) bis \_\_.\_\_.\_\_\_\_(TT.MM.JJJJ)

2. AU: von \_\_.\_\_.\_\_\_\_(TT.MM.JJJJ) bis \_\_.\_\_.\_\_\_\_(TT.MM.JJJJ)

3. AU: von \_\_.\_\_.\_\_\_\_(TT.MM.JJJJ) bis \_\_.\_\_.\_\_\_\_(TT.MM.JJJJ)

4. AU: von \_\_.\_\_.\_\_\_\_(TT.MM.JJJJ) bis \_\_.\_\_.\_\_\_\_(TT.MM.JJJJ)

5. AU: von \_\_.\_\_.\_\_\_\_(TT.MM.JJJJ) bis \_\_.\_\_.\_\_\_\_(TT.MM.JJJJ)

#### 2. Bezogen Sie in den letzten 3 Monaten bzw. beziehen Sie aktuell Krankengeld?

nein

ja

wenn ja, geben Sie bitte den Zeitraum des Krankengeldbezugs an:

von \_\_.\_\_.\_\_\_\_(TT.MM.JJJJ) bis \_\_.\_\_.\_\_\_\_(TT.MM.JJJJ)

#### 3. Hatten Sie innerhalb der letzten 3 Monate Kontakt mit einer ambulanten Arztpraxis (inkl. Rezept/Überweisung abholen, Blutabnahme, telefonische Beratung, Impfung und Hausbesuch)? Bitte beziehen Sie Arztkontakte im Rahmen der Reduct-Studie nicht ein.

nein

ja, welche:

Hausarzt Anzahl Besuche: \_\_\_\_

Augenarzt: Anzahl Besuche: \_\_\_\_

Chirurg: Anzahl Besuche: \_\_\_\_

Gynäkologe: Anzahl Besuche: \_\_\_\_

Hautarzt: Anzahl Besuche: \_\_\_\_

HNO-Arzt: Anzahl Besuche: \_\_\_\_

psychiatrische Institutsambulanz (PIA) und ambulante Kontakte im psychiatrischen/psychosomatischen Krankenhaus Anzahl Besuche: \_\_\_\_

Internist (z.B. Onkologe, , Kardiologe, Gastroenterologe, Nephrologe, Diabetologe, Pulmologe, usw.) Anzahl Besuche: \_\_\_\_

Neurologe: Anzahl Besuche: \_\_\_\_

Orthopäde: Anzahl Besuche: \_\_\_\_

Psychiater: Anzahl Besuche: \_\_\_\_



**5. Haben Sie innerhalb der letzten 3 Monate an einer Rehabilitations-Maßnahme teilgenommen?**

nein

ja

wenn ja, geben Sie bitte den Zeitraum des Reha-Aufenthaltes an und machen Angaben zum Grund des Aufenthaltes, zur Abteilung und zur Unterbringungsform:

Aufenthalt 1 von \_\_\_\_\_.\_\_\_\_(TT.MM.JJJJ) bis \_\_\_\_\_.\_\_\_\_(TT.MM.JJJJ)

andere Abteilungen (primär körperliche Erkrankungen/ Behandlungen)

wegen einer sonstigen psychischen Erkrankung

Stationär

Teilstationär (Tages-/Nachklinik)

Aufenthalt 2 von \_\_\_\_\_.\_\_\_\_(TT.MM.JJJJ) bis \_\_\_\_\_.\_\_\_\_(TT.MM.JJJJ)

andere Abteilungen (primär körperliche Erkrankungen/ Behandlungen)

wegen einer sonstigen psychischen Erkrankung

Stationär

Teilstationär (Tages-/Nachklinik)

**6. Haben Sie innerhalb der letzten 3 Monate Medikamente eingenommen?**

nein  ja

wenn ja, geben Sie bitte den Medikamentennamen/Wirkstoff an, die Ihnen von einem Arzt verordnet wurden, die Dosis pro Tag und die Einnahmedauer an:

1. Medikament: \_\_\_\_\_ Tagesdosis: \_\_\_\_\_

Einnahme von \_\_\_\_\_.\_\_\_\_(TT.MM.JJJJ) bis \_\_\_\_\_.\_\_\_\_(TT.MM.JJJJ), ganzer Zeitraum

2. Medikament: \_\_\_\_\_ Tagesdosis: \_\_\_\_\_

Einnahme von \_\_\_\_\_.\_\_\_\_(TT.MM.JJJJ) bis \_\_\_\_\_.\_\_\_\_(TT.MM.JJJJ), ganzer Zeitraum

3. Medikament: \_\_\_\_\_ Tagesdosis: \_\_\_\_\_

Einnahme von \_\_\_\_\_.\_\_\_\_(TT.MM.JJJJ) bis \_\_\_\_\_.\_\_\_\_(TT.MM.JJJJ), ganzer Zeitraum

4. Medikament: \_\_\_\_\_ Tagesdosis: \_\_\_\_\_

Einnahme von \_\_\_\_\_.\_\_\_\_(TT.MM.JJJJ) bis \_\_\_\_\_.\_\_\_\_(TT.MM.JJJJ), ganzer Zeitraum

5. Medikament: \_\_\_\_\_ Tagesdosis: \_\_\_\_\_

Einnahme von \_\_\_\_\_.\_\_\_\_(TT.MM.JJJJ) bis \_\_\_\_\_.\_\_\_\_(TT.MM.JJJJ), ganzer Zeitraum

6. Medikament: \_\_\_\_\_ Tagesdosis: \_\_\_\_\_

Einnahme von \_\_\_\_\_.\_\_\_\_(TT.MM.JJJJ) bis \_\_\_\_\_.\_\_\_\_(TT.MM.JJJJ), ganzer Zeitraum



1  
2  
3  
4  
5  
6 **7. Haben Sie innerhalb der letzten 3 Monate Heilmittel in Anspruch genommen (z.B.**  
7 **Physiotherapie, Logopädie, Ergotherapie)?**

8  nein

9  ja

10  Physiotherapie: Anzahl Besuche: \_\_\_\_

11  
12  Logopädie: Anzahl Besuche: \_\_\_\_

13  
14  
15  Ergotherapie/Arbeitstherapie: Anzahl Besuche: \_\_\_\_

16  
17  Soziotherapie: Anzahl Besuche: \_\_\_\_

18  
19  Tanztherapie/Bewegungstherapie: Anzahl Besuche: \_\_\_\_

20  Einzel  Gruppe

21  
22  Kreativtherapie: Anzahl Besuche: \_\_\_\_

23  Einzel  Gruppe

24  
25  Kunsttherapie: Anzahl Besuche: \_\_\_\_

26  Einzel  Gruppe

27  
28  Musiktherapie: Anzahl Besuche: \_\_\_\_

29  Einzel  Gruppe

30  
31  Theatertherapie: Anzahl Besuche: \_\_\_\_

32  Einzel  Gruppe

33  
34  Entspannungstechniken (autogenes Training) /progressive  
35 Muskelentspannung): Anzahl Besuche: \_\_\_\_

36  Einzel  Gruppe

37  
38  sonstige, und zwar: \_\_\_\_\_ Anzahl Besuche: \_\_\_\_

39  Einzel  Gruppe

**8. Haben Sie innerhalb der letzten 3 Monate folgende Angebote in Anspruch genommen?**

**(Nicht im Rahmen eines ambulanten Arzt-/Psychotherapeutenkontaktes oder Krankenhauskontakts)**

Psychoonkologische Beratungsstelle:

Anzahl Kontakte: \_\_\_ durchschnittliche Dauer pro Kontakt: \_\_\_\_\_ Minuten

Beratungsstelle bei psychischen Problemen:

Anzahl Kontakte: \_\_\_ durchschnittliche Dauer pro Kontakt: \_\_\_\_\_ Minuten

Sozialpsychiatrischer Dienst/Psychosozialer Krisendienst:

Anzahl Kontakte: \_\_\_ durchschnittliche Dauer pro Kontakt: \_\_\_\_\_ Minuten

Tagesstätten/Kontaktstätten für Menschen mit psychischen Problemen:

Anzahl Kontakte: \_\_\_ durchschnittliche Dauer pro Kontakt: \_\_\_\_\_ Minuten

Selbsthilfegruppen aufgrund psychischer Probleme:

Anzahl Kontakte: \_\_\_ durchschnittliche Dauer pro Kontakt: \_\_\_\_\_ Minuten

weitere Angebote aufgrund psychischer Probleme (z.B. Sorgentelefon)

und zwar: \_\_\_\_\_

Anzahl Kontakte: \_\_\_ durchschnittliche Dauer pro Kontakt: \_\_\_\_\_ Minuten

**9. Bitte geben Sie an, ob bei Ihnen aktuell ein Pflegegrad vorliegt.**

nein

ja, seit \_\_\_\_\_

Pflegegrad 1

Pflegegrad 2

Pflegegrad 3

Pflegegrad 4

Pflegegrad 5

**10.** Bitte geben Sie an, ob Sie Leistungen der Pflegekasse beziehen.

- nein
- ja
- Pflegegeld für häusliche Pflege
  - Pflegesachleistungen für häusliche Pflege
  - kombinierte Pflegegeld und Pflegesachleistung
  - Entlastungsbetrag bei häuslicher Pflege
  - Wohnumfeld verbessernde Maßnahmen
  - Pflegesachleistungen für teilstationäre Pflege
  - Pflegesachleistungen für vollstationäre Pflege
  - zum Verbrauch bestimmte Pflegehilfsmittel

**IV Fragen zur psychotherapeutischen/psychopharmakologischen Behandlung****1) Nehmen Sie aktuell Medikamente gegen Ängste, Depression oder Schlafstörungen ein?**

- Nein
- Ja, folgende: \_\_\_\_\_
- Dosis \_\_\_\_\_
- Seit wann? \_\_\_\_\_

**2) Sind Sie aktuell in psychotherapeutischer/psychiatrischer Behandlung?**

- Nein
- Ja

Wie viele Sitzungen haben stattgefunden? \_\_\_\_\_ Sitzungen

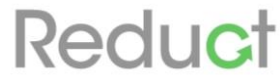

1  
2  
3  
4  
5  
6 Liebe Teilnehmerin, lieber Teilnehmer,

7  
8 Vielen Dank, dass Sie uns mit Ihrer Teilnahme an unserer Befragung unterstützen!

9  
10 In drei Monaten werden Sie einen letzten Fragebogen erhalten. Nach der Bearbeitung dieses  
11 Fragebogens ist die Studie abgeschlossen.

12  
13 Sollten Sie Fragen haben, können Sie gerne jederzeit eine E-Mail an [reduct@uni-due.de](mailto:reduct@uni-due.de) senden.

14  
15  
16 Auf diesem Wege wünschen wir Ihnen weiterhin alles Gute

17  
18 Ihr Reduct Team  
19  
20  
21  
22  
23  
24  
25  
26  
27  
28  
29  
30  
31  
32  
33  
34  
35  
36  
37  
38  
39  
40  
41  
42  
43  
44  
45  
46  
47  
48  
49  
50  
51  
52  
53  
54  
55  
56  
57  
58  
59  
60

Teilnehmer-ID: \_\_\_\_\_

# Reduct- Web-Basierte Achtsamkeits- und Skillsbasierte Stressreduktion für Patientinnen und Patienten mit Krebs

Liebe Teilnehmerin, lieber Teilnehmer

willkommen zurück! Sie sind am letzten Teil der Studie und damit an dem letzten Fragebogen angekommen. Wir hoffen, dass Sie die Inhalte unserer Reduct-Web-App weiterhin in Ihrem Alltag begleitet und dass auch Sie davon profitieren konnten. Für diesen Fragebogen werden Sie 10-15 Minuten benötigen.

Sollten Sie Fragen haben, können Sie gerne jederzeit eine E-Mail an [reduct@uni-due.de](mailto:reduct@uni-due.de) senden.

Wenn Sie merken, dass Sie sich sehr belastet fühlen und Sie mehr Unterstützung bei der Bewältigung Ihrer Erkrankung benötigen, können Sie sich jederzeit an die/den Studienverantwortliche/n Ihres Zentrums wenden. Diese/r kann Ihnen bei der Suche psychoonkologischer Hilfsangebote zur Seite stehen.

Vielen Dank für Ihre Teilnahme und Unterstützung!

Ihr Reduct Team

\*Kontaktdaten

[2]

## I. Fragen zu Ihrem derzeitigen Befinden

### 1. Angst und Stresserleben

Bitte beantworten Sie im Folgenden, wie sehr die jeweilige Aussage in der letzten Woche auf Sie zutraf.

- |                                                                                           |                                                                     |
|-------------------------------------------------------------------------------------------|---------------------------------------------------------------------|
| 1.1. Ich fühle mich angespannt oder überreizt.                                            | 1.2. Ich fühle mich in meinen Aktivitäten gebremst.                 |
| 3 meistens                                                                                | 3 fast immer                                                        |
| 2 oft                                                                                     | 2 sehr oft                                                          |
| 1 von Zeit zu Zeit/ gelegentlich                                                          | 1 manchmal                                                          |
| 0 überhaupt nicht                                                                         | 0 überhaupt nicht                                                   |
| 1.3. Ich kann mich heute noch so freuen wie früher.                                       | 1.4. Ich habe manchmal ein ängstliches Gefühl in der Magengegend.   |
| 0 ganz genau so                                                                           | 0 überhaupt nicht                                                   |
| 1 nicht ganz so sehr                                                                      | 1 gelegentlich                                                      |
| 2 Nur noch ein wenig                                                                      | 2 ziemlich oft                                                      |
| 3 kaum oder gar nicht                                                                     | 3 sehr oft                                                          |
| 1.5. Mich überkommt eine ängstliche Vorahnung, dass etwas Schreckliches passieren könnte. | 1.6. Ich habe das Interesse an meiner äußeren Erscheinung verloren. |
| 3 ja, sehr stark                                                                          | 3 ja, stimmt genau                                                  |
| 2 ja, aber nicht allzu stark                                                              | 2 ich kümmere mich nicht so sehr darum, wie ich sollte              |
| 1 etwas, aber es macht mir keine Sorgen                                                   | 1 möglicherweise kümmere ich mich zu wenig darum                    |
| 0 überhaupt nicht                                                                         | 0 ich kümmere mich so viel darum wie immer                          |
| 1.7. Ich kann lachen und die lustige Seite der Dinge sehen.                               | 1.8. Ich fühle mich rastlos, muss immer in Bewegung sein.           |
| 0 ja, so viel wie immer                                                                   | 3 ja, tatsächlich sehr                                              |
| 1 nicht mehr ganz so viel                                                                 | 2 ziemlich                                                          |
| 2 inzwischen viel weniger                                                                 | 1 nicht sehr                                                        |
| 3 überhaupt nicht                                                                         | 0 überhaupt nicht                                                   |

1.9. Mir gehen beunruhigende Gedanken durch den Kopf.

- 3 einen Großteil der Zeit  
 2 verhältnismäßig oft  
 1 von Zeit zu Zeit, aber nicht allzu oft  
 0 nur gelegentlich/nie

1.10. Ich blicke mit Freude in die Zukunft.

- 0 ja, sehr  
 1 eher weniger als früher  
 2 viel weniger als früher  
 3 kaum bis gar nicht

1.11. Ich fühle mich glücklich.

- 3 überhaupt nicht  
 2 selten  
 1 manchmal  
 0 meistens

1.12. Mich überkommt plötzlich ein panikartiger Zustand.

- 3 ja, tatsächlich sehr oft  
 2 ziemlich oft  
 1 nicht sehr oft  
 0 überhaupt nicht

1.13. Ich kann behaglich dasitzen und mich entspannen.

- 0 ja, natürlich  
 1 gewöhnlich schon  
 2 nicht oft  
 3 überhaupt nicht

1.14. Ich kann mich an einem guten Buch, einer Radio- oder Fernsehsendung erfreuen.

- 0 oft  
 1 manchmal  
 2 Eher selten  
 3 Sehr selten

## 2. Belastungsthermometer

Bitte markieren Sie am Thermometer die Zahl, die am besten beschreibt, wie belastet Sie sich in der letzten Woche einschließlich heute gefühlt haben.

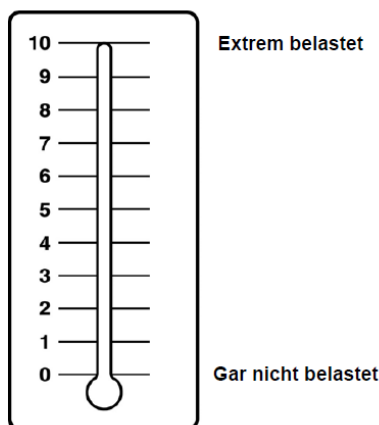

### 3. Skala zur Allgemeinen Selbstwirksamkeitserwartung

Kreuzen Sie bitte bei jeder Frage die Antwort an, die am besten auf Sie zutrifft.

|                                                                                                    | Stimmt<br>nicht | Stimmt<br>kaum | Stimmt<br>eher | Stimmt<br>genau |
|----------------------------------------------------------------------------------------------------|-----------------|----------------|----------------|-----------------|
| 3.1. Wenn sich Widerstände auftun, finde ich Mittel und Wege, mich durchzusetzen.                  | 1               | 2              | 3              | 4               |
| 3.2. Die Lösung schwieriger Probleme gelingt mir immer, wenn ich mich darum bemühe.                | 1               | 2              | 3              | 4               |
| 3.3. Es bereitet mir keine Schwierigkeiten, meine Absichten und Ziele zu verwirklichen.            | 1               | 2              | 3              | 4               |
| 3.4. In unerwarteten Situationen weiß ich immer, wie ich mich verhalten soll.                      | 1               | 2              | 3              | 4               |
| 3.5. Auch bei überraschenden Ereignissen glaube ich, dass ich gut mit ihnen zurechtkommen kann.    | 1               | 2              | 3              | 4               |
| 3.6. Schwierigkeiten sehe ich gelassen entgegen, weil ich meinen Fähigkeiten immer vertrauen kann. | 1               | 2              | 3              | 4               |
| 3.7. Was auch immer passiert, ich werde schon klarkommen.                                          | 1               | 2              | 3              | 4               |
| 3.8. Für jedes Problem kann ich eine Lösung finden.                                                | 1               | 2              | 3              | 4               |
| 3.9. Wenn eine neue Sache auf mich zukommt, weiß ich, wie ich damit umgehen kann.                  | 1               | 2              | 3              | 4               |
| 3.10. Wenn ein Problem auftaucht, kann ich es aus eigener Kraft meistern.                          | 1               | 2              | 3              | 4               |



## 4. Lebensqualität (EORT-QLQ-C30)

Bitte kreuzen Sie im Folgenden Abschnitt die Zahl von 1 bis 4 an, die am besten auf Sie zutrifft.

|                                                                                                                                      | Überhaupt<br>nicht | Wenig | Mäßig | Sehr |
|--------------------------------------------------------------------------------------------------------------------------------------|--------------------|-------|-------|------|
| 4.1. Bereitet es Ihnen Schwierigkeiten, sich körperlich anzustrengen (z.B. eine schwere Einkaufstasche oder einen Koffer zu tragen)? | 1                  | 2     | 3     | 4    |
| 4.2. Bereitet es Ihnen Schwierigkeiten, einen <u>längeren</u> Spaziergang zu machen?                                                 | 1                  | 2     | 3     | 4    |
| 4.3. Bereitet es Ihnen Schwierigkeiten, eine <u>kurze</u> Strecke außer Haus zu gehen?                                               | 1                  | 2     | 3     | 4    |
| 4.4. Müssen Sie tagsüber im Bett liegen oder in einem Sessel sitzen?                                                                 | 1                  | 2     | 3     | 4    |
| 4.5. Brauchen Sie Hilfe beim Essen, Anziehen, Waschen oder Benutzen der Toilette?                                                    | 1                  | 2     | 3     | 4    |
| <b>Während der letzten Woche:</b>                                                                                                    |                    |       |       |      |
|                                                                                                                                      | Überhaupt<br>nicht | Wenig | Mäßig | Sehr |
| 4.6. Waren Sie bei Ihrer Arbeit oder bei anderen tagtäglichen Beschäftigungen eingeschränkt?                                         | 1                  | 2     | 3     | 4    |
| 4.7. Waren Sie bei Ihren Hobbys oder andere Freizeitbeschäftigungen eingeschränkt?                                                   | 1                  | 2     | 3     | 4    |
| 4.8. Waren Sie kurzatmig?                                                                                                            | 1                  | 2     | 3     | 4    |
| 4.9. Hatten Sie Schmerzen?                                                                                                           | 1                  | 2     | 3     | 4    |
| 4.10. Mussten Sie sich ausruhen?                                                                                                     | 1                  | 2     | 3     | 4    |
| 4.11. Hatten Sie Schlafstörungen?                                                                                                    | 1                  | 2     | 3     | 4    |

4.12. Fühlten Sie sich schwach?

1 2 3 4

**Während der letzten Woche:**

**Überhaupt  
nicht**

**Wenig**

**Mäßig**

**Sehr**

4.13. Hatten Sie Appetitmangel?

1 2 3 4

4.14. War Ihnen übel?

1 2 3 4

4.15. Haben Sie erbrochen?

1 2 3 4

4.16. Hatten Sie Verstopfung?

1 2 3 4

4.17. Hatten Sie Durchfall?

1 2 3 4

4.18. Waren Sie müde?

1 2 3 4

4.19. Fühlten Sie sich durch  
Schmerzen in Ihrem alltäglichen  
Leben beeinträchtigt?

1 2 3 4

4.20. Hatten Sie Schwierigkeiten, sich  
auf etwas zu konzentrieren, z.B. auf  
das Zeitungslesen oder das  
Fernsehen?

1 2 3 4

4.21. Fühlten Sie sich angespannt?

1 2 3 4

4.22. Haben Sie sich Sorgen  
gemacht?

1 2 3 4

4.23. Waren Sie reizbar?

1 2 3 4

4.24. Fühlten Sie sich  
niedergeschlagen?

1 2 3 4

4.25. Hatten Sie Schwierigkeiten, sich  
an Dinge zu erinnern?

1 2 3 4

4.26. Hat Ihr körperlicher Zustand  
oder Ihre medizinische Behandlung  
Ihr Familienleben beeinträchtigt?

1 2 3 4

4.27. Hat Ihr körperlicher Zustand  
oder Ihre medizinische Behandlung  
Ihr Zusammensein oder Ihre

1 2 3 4

gemeinsamen Unternehmungen mit anderen Menschen beeinträchtigt?

4.28. Hat Ihr körperlicher Zustand oder Ihre medizinische Behandlung für Sie finanzielle Schwierigkeiten mit sich gebracht?

|   |   |   |   |
|---|---|---|---|
| 1 | 2 | 3 | 4 |
|---|---|---|---|

Bitte kreuzen Sie bei den folgenden Fragen die Zahl zwischen 1 und 7 an, die am besten auf Sie zutrifft.

4.29. Wie würden Sie insgesamt Ihren Gesundheitszustand während der letzten Woche einschätzen?

|               |   |   |   |   |   |               |
|---------------|---|---|---|---|---|---------------|
| 1             | 2 | 3 | 4 | 5 | 6 | 7             |
| sehr schlecht |   |   |   |   |   | ausgezeichnet |

4.30. Wie würden Sie insgesamt Ihre Lebensqualität während der letzten Woche einschätzen?

|               |   |   |   |   |   |               |
|---------------|---|---|---|---|---|---------------|
| 1             | 2 | 3 | 4 | 5 | 6 | 7             |
| sehr schlecht |   |   |   |   |   | ausgezeichnet |

1  
2  
3  
4  
5 **5. Lebensqualität (EQ-5D-5L)**  
6

7 **Bitte kreuzen Sie unter jeder Überschrift das Kästchen an, das Ihren Gesundheitszustand heute am**  
8 **besten beschreibt.**  
9

10  
11 **5.1. Beweglichkeit/Mobilität**  
12

- 13 Ich habe keine Probleme herumzugehen 1  
14  
15 Ich habe leichte Probleme herumzugehen 2  
16  
17 Ich habe mäßige Probleme herumzugehen 3  
18  
19 Ich habe große Probleme herumzugehen 4  
20  
21 Ich bin nicht in der Lage, herumzugehen 5  
22  
23  
24

25 **5.2. Für sich selbst sorgen**  
26

- 27 Ich habe keine Probleme, mich selbst zu waschen oder anzuziehen 1  
28  
29 Ich habe leichte Probleme, mich selbst zu waschen oder anzuziehen 2  
30  
31 Ich habe mäßige Probleme, mich selbst zu waschen oder anzuziehen 3  
32  
33 Ich habe große Probleme, mich selbst zu waschen oder anzuziehen 4  
34  
35 Ich bin nicht in der Lage, mich selbst zu waschen oder anzuziehen 5  
36  
37  
38  
39

40 **5.3. Alltägliche Tätigkeiten** (z.B. Arbeit, Studium, Hausarbeit, Familien- oder Freizeitaktivitäten)  
41

- 42  
43 Ich habe keine Probleme, meinen alltäglichen Tätigkeiten nachzugehen 1  
44  
45 Ich habe leichte Probleme, meinen alltäglichen Tätigkeiten nachzugehen 2  
46  
47 Ich habe mäßige Probleme, meinen alltäglichen Tätigkeiten nachzugehen 3  
48  
49 Ich habe große Probleme, meinen alltäglichen Tätigkeiten nachzugehen 4  
50  
51 Ich bin nicht in der Lage, meinen alltäglichen Tätigkeiten nachzugehen 5  
52  
53  
54  
55  
56  
57  
58  
59  
60

**5.4. Schmerzen/Körperliche Beschwerden**

|                                             |   |
|---------------------------------------------|---|
| Ich habe keine Schmerzen oder Beschwerden   | 1 |
| Ich habe leichte Schmerzen oder Beschwerden | 2 |
| Ich habe mäßige Schmerzen oder Beschwerden  | 3 |
| Ich habe starke Schmerzen oder Beschwerden  | 4 |
| Ich habe extreme Schmerzen oder Beschwerden | 5 |

**5.5. Angst/Niedergeschlagenheit**

|                                             |   |
|---------------------------------------------|---|
| Ich bin nicht ängstlich oder deprimiert     | 1 |
| Ich bin ein wenig ängstlich oder deprimiert | 2 |
| Ich bin mäßig ängstlich oder deprimiert     | 3 |
| Ich bin sehr ängstlich oder deprimiert      | 4 |
| Ich bin extrem ängstlich oder deprimiert    | 5 |

5.6 Um Sie bei der Einschätzung, wie gut oder wie schlecht Ihr Gesundheitszustand ist, zu unterstützen, haben wir eine Skala gezeichnet, ähnlich einem Thermometer. Der best denkbare Gesundheitszustand ist mit einer "100" gekennzeichnet, der schlechteste mit "0".

Wir möchten Sie nun bitten, auf dieser Skala zu kennzeichnen, wie gut oder schlecht Ihrer Ansicht nach Ihr persönlicher Gesundheitszustand heute ist. Bitte verbinden Sie dazu den untenstehenden Kasten mit dem Punkt auf der Skala, der Ihren heutigen Gesundheitszustand am besten wiedergibt.

**Ihr heutiger  
Gesundheitszustand**

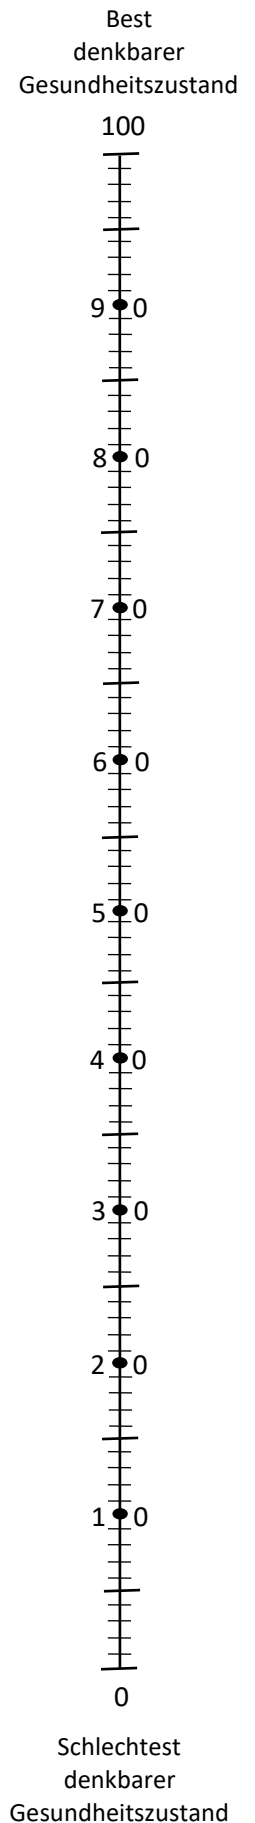

## 6. Achtsamkeit (FFA)

Dieser Fragebogen soll Ihre Achtsamkeit erfassen. Bitte beziehen Sie dabei die Aussagen auf die letzten 14 Tage. Kreuzen Sie bitte bei jeder Frage die Antwort an, die am besten auf Sie zutrifft.

|                                                                                                             | Fast<br>nie | Eher selten | Relativ<br>oft | Fast<br>immer |
|-------------------------------------------------------------------------------------------------------------|-------------|-------------|----------------|---------------|
| 6.1. Ich bin offen für die Erfahrung des Augenblicks.                                                       | 1           | 2           | 3              | 4             |
| 6.2. Ich spüre in meinen Körper hinein, sei es beim Essen, Kochen, Putzen, Reden.                           | 1           | 2           | 3              | 4             |
| 6.3. Wenn ich merke, dass ich abwesend war, kehre ich sanft zur Erfahrung des Augenblicks zurück.           | 1           | 2           | 3              | 4             |
| 6.4. Ich kann mich selbst wertschätzen.                                                                     | 1           | 2           | 3              | 4             |
| 6.5. Ich achte auf die Motive meiner Handlungen.                                                            | 1           | 2           | 3              | 4             |
| 6.6. Ich sehe meine Fehler und Schwierigkeiten, ohne mich zu verurteilen.                                   | 1           | 2           | 3              | 4             |
| 6.7. Ich bin in Kontakt mit meinen Erfahrungen, hier und jetzt.                                             | 1           | 2           | 3              | 4             |
| 6.8. Ich nehme unangenehme Erfahrungen an.                                                                  | 1           | 2           | 3              | 4             |
| 6.9. Ich bin mir selbst gegenüber freundlich, wenn Dinge schief laufen.                                     | 1           | 2           | 3              | 4             |
| 6.10. Ich beobachte meine Gefühle, ohne mich in ihnen zu verlieren.                                         | 1           | 2           | 3              | 4             |
| 6.11. In schwierigen Situationen kann ich innehalten.                                                       | 1           | 2           | 3              | 4             |
| 6.12. Ich erlebe Momente innerer Ruhe und Gelassenheit, selbst wenn äußerlich Schmerzen und Unruhe da sind. | 1           | 2           | 3              | 4             |
| 6.13. Ich bin ungeduldig mit mir und meinen Mitmenschen.                                                    | 4           | 3           | 2              | 1             |
| 6.14. Ich kann darüber lächeln, wenn ich sehe, wie ich mir manchmal das Leben schwer mache.                 | 1           | 2           | 3              | 4             |

1  
2  
3 **7. Wie oft fühlten Sie sich im Verlauf der letzten 2 Wochen durch die folgenden Beschwerden**  
4 **beeinträchtigt? (PHQ-4)**  
5

|    | Überhaupt<br>nicht | An einzelnen<br>Tagen | An mehr als<br>der Hälfte der<br>Tage | Beinahe<br>jeden Tag |
|----|--------------------|-----------------------|---------------------------------------|----------------------|
| 6  |                    |                       |                                       |                      |
| 7  |                    |                       |                                       |                      |
| 8  |                    |                       |                                       |                      |
| 9  |                    |                       |                                       |                      |
| 10 |                    |                       |                                       |                      |
| 11 |                    |                       |                                       |                      |
| 12 |                    |                       |                                       |                      |
| 13 |                    |                       |                                       |                      |
| 14 |                    |                       |                                       |                      |
| 15 |                    |                       |                                       |                      |
| 16 |                    |                       |                                       |                      |
| 17 |                    |                       |                                       |                      |
| 18 |                    |                       |                                       |                      |
| 19 |                    |                       |                                       |                      |
| 20 |                    |                       |                                       |                      |
| 21 |                    |                       |                                       |                      |
| 22 |                    |                       |                                       |                      |
| 23 |                    |                       |                                       |                      |
| 24 |                    |                       |                                       |                      |
| 25 |                    |                       |                                       |                      |
| 26 |                    |                       |                                       |                      |
| 27 |                    |                       |                                       |                      |
| 28 |                    |                       |                                       |                      |
| 29 |                    |                       |                                       |                      |
| 30 |                    |                       |                                       |                      |
| 31 |                    |                       |                                       |                      |
| 32 |                    |                       |                                       |                      |
| 33 |                    |                       |                                       |                      |
| 34 |                    |                       |                                       |                      |
| 35 |                    |                       |                                       |                      |
| 36 |                    |                       |                                       |                      |
| 37 |                    |                       |                                       |                      |
| 38 |                    |                       |                                       |                      |
| 39 |                    |                       |                                       |                      |
| 40 |                    |                       |                                       |                      |
| 41 |                    |                       |                                       |                      |
| 42 |                    |                       |                                       |                      |
| 43 |                    |                       |                                       |                      |
| 44 |                    |                       |                                       |                      |
| 45 |                    |                       |                                       |                      |
| 46 |                    |                       |                                       |                      |
| 47 |                    |                       |                                       |                      |
| 48 |                    |                       |                                       |                      |
| 49 |                    |                       |                                       |                      |
| 50 |                    |                       |                                       |                      |
| 51 |                    |                       |                                       |                      |
| 52 |                    |                       |                                       |                      |
| 53 |                    |                       |                                       |                      |
| 54 |                    |                       |                                       |                      |
| 55 |                    |                       |                                       |                      |
| 56 |                    |                       |                                       |                      |
| 57 |                    |                       |                                       |                      |
| 58 |                    |                       |                                       |                      |
| 59 |                    |                       |                                       |                      |
| 60 |                    |                       |                                       |                      |



## 8. Skills

Kreuzen Sie bitte bei jeder Frage die Antwort an, die am besten auf Sie zutrifft.

|                                                                                                               | Stimmt<br>überhaupt<br>nicht |   | Neutral |   | Stimmt<br>voll-<br>kommen |
|---------------------------------------------------------------------------------------------------------------|------------------------------|---|---------|---|---------------------------|
| 8.1. In belastenden Situationen kann ich mich aufmuntern, indem ich meine Gedanken auf positive Dinge richte. | 1                            | 2 | 3       | 4 | 5                         |
| 8.2. Meine Gedanken geben mir im Umgang mit stressigen Situationen Kraft.                                     | 1                            | 2 | 3       | 4 | 5                         |
| 8.3. Wenn ich belastende Gefühle verspüre, lasse ich sie zu.                                                  | 1                            | 2 | 3       | 4 | 5                         |
| 8.4. Ich kann Dinge annehmen, die ich nicht ändern kann.                                                      | 1                            | 2 | 3       | 4 | 5                         |
| 8.5. Ich überlege mir, was ich im Umgang mit der Krebserkrankung tun kann.                                    | 1                            | 2 | 3       | 4 | 5                         |
| 8.6. Ich führe oft bestimmte Aktivitäten aus, um auf andere Gedanken zu kommen.                               | 1                            | 2 | 3       | 4 | 5                         |
| 8.7. Ich kann mir wohlwollend begegnen.                                                                       | 1                            | 2 | 3       | 4 | 5                         |
| 8.8. Ich kann gut für mich sorgen.                                                                            | 1                            | 2 | 3       | 4 | 5                         |
| 8.9. Ich suche Kontakt zu liebevollen Menschen.                                                               | 1                            | 2 | 3       | 4 | 5                         |
| 8.10. Ich kann nach Unterstützung suchen.                                                                     | 1                            | 2 | 3       | 4 | 5                         |

## II. Achtsamkeit und Nutzung der Reduct-Web-App in der Zwischenzeit

1) Bitte geben Sie an, wie häufig Sie seit der Bearbeitung des letzten Fragebogens bzw. der Reduct-Web-App Achtsamkeitsübungen in Ihren Alltag eingebaut haben.

|                          |                          |                          |                          |                          |                          |
|--------------------------|--------------------------|--------------------------|--------------------------|--------------------------|--------------------------|
| <input type="checkbox"/> |
| 1                        | 2                        | 3                        | 4                        | 5                        | 6                        |
| (fast) nie               | Ca. einmal im Monat      | Mehrmals im Monat        | Ca. einmal in der Woche  | Mehrmals in der Woche    | (fast) täglich           |

2) Konnten Sie die erlernten Strategien/Skills in Ihren Alltag integrieren?

|                          |                          |                          |                          |                          |                          |
|--------------------------|--------------------------|--------------------------|--------------------------|--------------------------|--------------------------|
| <input type="checkbox"/> |
| 1                        | 2                        | 3                        | 4                        | 5                        | 6                        |
| (fast) nie               | Ca. einmal im Monat      | Mehrmals im Monat        | Ca. einmal in der Woche  | Mehrmals in der Woche    | (fast) täglich           |

3) Haben Ihnen die Inhalte der Reduct-Web-App dabei geholfen, mit krankheitsbezogenen Belastungen besser umzugehen?

|                           |                          |                          |                          |                          |
|---------------------------|--------------------------|--------------------------|--------------------------|--------------------------|
| <input type="checkbox"/>  | <input type="checkbox"/> | <input type="checkbox"/> | <input type="checkbox"/> | <input type="checkbox"/> |
| 1                         | 2                        | 3                        | 4                        | 5                        |
| Trifft überhaupt nicht zu | Trifft eher weniger zu   | Trifft teilweise zu      | Trifft eher zu           | Trifft vollkommen zu     |

### III. Gesundheitsökonomische Fragen

#### 1. Lag bei Ihnen innerhalb der letzten 3 Monate eine Arbeitsunfähigkeit (AU) vor?

nein

ja

wenn ja, bitte geben Sie den Zeitraum jeder AU mit Datum an und fassen dabei die Dauer für jede zusammenhängende AU (Folgebescheinigungen) wegen derselben Erkrankung zusammen.

1. AU: von \_\_.\_\_.\_\_\_\_(TT.MM.JJJJ) bis \_\_.\_\_.\_\_\_\_(TT.MM.JJJJ)

2. AU: von \_\_.\_\_.\_\_\_\_(TT.MM.JJJJ) bis \_\_.\_\_.\_\_\_\_(TT.MM.JJJJ)

3. AU: von \_\_.\_\_.\_\_\_\_(TT.MM.JJJJ) bis \_\_.\_\_.\_\_\_\_(TT.MM.JJJJ)

4. AU: von \_\_.\_\_.\_\_\_\_(TT.MM.JJJJ) bis \_\_.\_\_.\_\_\_\_(TT.MM.JJJJ)

5. AU: von \_\_.\_\_.\_\_\_\_(TT.MM.JJJJ) bis \_\_.\_\_.\_\_\_\_(TT.MM.JJJJ)

#### 2. Bezogen Sie in den letzten 3 Monaten bzw. beziehen Sie aktuell Krankengeld?

nein

ja

wenn ja, geben Sie bitte den Zeitraum des Krankengeldbezugs an:

von \_\_.\_\_.\_\_\_\_(TT.MM.JJJJ) bis \_\_.\_\_.\_\_\_\_(TT.MM.JJJJ)

#### 3. Hatten Sie innerhalb der letzten 3 Monate Kontakt mit einer ambulanten Arztpraxis (inkl. Rezept/Überweisung abholen, Blutabnahme, telefonische Beratung, Impfung und Hausbesuch)? Bitte beziehen Sie Arztkontakte im Rahmen der Reduct-Studie nicht ein.

nein

ja, welche:

Hausarzt Anzahl Besuche: \_\_\_\_

Augenarzt: Anzahl Besuche: \_\_\_\_

Chirurg: Anzahl Besuche: \_\_\_\_

Gynäkologe: Anzahl Besuche: \_\_\_\_

Hautarzt: Anzahl Besuche: \_\_\_\_

HNO-Arzt: Anzahl Besuche: \_\_\_\_

psychiatrische Institutsambulanz (PIA) und ambulante Kontakte im psychiatrischen/psychosomatischen Krankenhaus Anzahl Besuche: \_\_\_\_

Internist (z.B. Onkologe, , Kardiologe, Gastroenterologe, Nephrologe, Diabetologe, Pulmologe, usw.) Anzahl Besuche: \_\_\_\_

Neurologe: Anzahl Besuche: \_\_\_\_

Orthopäde: Anzahl Besuche: \_\_\_\_

Psychiater: Anzahl Besuche: \_\_\_\_





1  
2  
3  
4  
5  
6 **7. Haben Sie innerhalb der letzten 3 Monate Heilmittel in Anspruch genommen (z.B.**  
7 **Physiotherapie, Logopädie, Ergotherapie)?**

8  nein

9  ja

10  Physiotherapie: Anzahl Besuche: \_\_\_\_

11  
12  Logopädie: Anzahl Besuche: \_\_\_\_

13  
14  
15  Ergotherapie/Arbeitstherapie: Anzahl Besuche: \_\_\_\_

16  
17  
18  Soziotherapie: Anzahl Besuche: \_\_\_\_

19  
20  
21  Tanztherapie/Bewegungstherapie: Anzahl Besuche: \_\_\_\_

22  Einzel  Gruppe

23  
24  
25  Kreativtherapie: Anzahl Besuche: \_\_\_\_

26  Einzel  Gruppe

27  
28  
29  Kunsttherapie: Anzahl Besuche: \_\_\_\_

30  Einzel  Gruppe

31  
32  
33  Musiktherapie: Anzahl Besuche: \_\_\_\_

34  Einzel  Gruppe

35  
36  
37  Theatertherapie: Anzahl Besuche: \_\_\_\_

38  Einzel  Gruppe

39  
40  
41  Entspannungstechniken (autogenes Training) /progressive  
42 Muskelentspannung): Anzahl Besuche: \_\_\_\_

43  Einzel  Gruppe

44  
45  
46  sonstige, und zwar: \_\_\_\_\_ Anzahl Besuche: \_\_\_\_

47  Einzel  Gruppe

1  
2  
3 **8. Haben Sie innerhalb der letzten 3 Monate folgende Angebote in Anspruch genommen?**  
4  
5

6 **(Nicht im Rahmen eines ambulanten Arzt-/Psychotherapeutenkontaktes oder**  
7 **Krankenhauskontakt)**  
8

9  
10  Psychoonkologische Beratungsstelle:

11 Anzahl Kontakte: \_\_\_ durchschnittliche Dauer pro Kontakt: \_\_\_\_\_ Minuten  
12

13  
14  Beratungsstelle bei psychischen Problemen:

15 Anzahl Kontakte: \_\_\_ durchschnittliche Dauer pro Kontakt: \_\_\_\_\_ Minuten  
16

17  
18  Sozialpsychiatrischer Dienst/Psychosozialer Krisendienst:

19 Anzahl Kontakte: \_\_\_ durchschnittliche Dauer pro Kontakt: \_\_\_\_\_ Minuten  
20

21  
22  Tagesstätten/Kontaktstätten für Menschen mit psychischen Problemen:

23 Anzahl Kontakte: \_\_\_ durchschnittliche Dauer pro Kontakt: \_\_\_\_\_ Minuten  
24

25  
26  Selbsthilfegruppen aufgrund psychischer Probleme:

27 Anzahl Kontakte: \_\_\_ durchschnittliche Dauer pro Kontakt: \_\_\_\_\_ Minuten  
28

29  
30  weitere Angebote aufgrund psychischer Probleme (z.B. Sorgentelefon)

31 und zwar: \_\_\_\_\_  
32

33 Anzahl Kontakte: \_\_\_ durchschnittliche Dauer pro Kontakt: \_\_\_\_\_ Minuten  
34  
35  
36  
37

38 **9. Bitte geben Sie an, ob bei Ihnen aktuell ein Pflegegrad vorliegt.**

39  nein

40  ja, seit \_\_\_\_\_

41  Pflegegrad 1

42  Pflegegrad 2

43  Pflegegrad 3

44  Pflegegrad 4

45  Pflegegrad 5  
46  
47  
48  
49  
50

51 **10. Bitte geben Sie an, ob Sie Leistungen der Pflegekasse beziehen.**

52  nein

53  ja

54  Pflegegeld für häusliche Pflege

55  Pflegesachleistungen für häusliche Pflege

56  kombinierte Pflegegeld und Pflegesachleistung

57  Entlastungsbetrag bei häuslicher Pflege

58  Wohnumfeld verbessernde Maßnahmen  
59  
60

# Reduct

1  
2  
3  
4  
5  
6  
7  
8  
9  
10  
11  
12  
13  
14  
15  
16  
17  
18  
19  
20  
21  
22  
23  
24  
25  
26  
27  
28  
29  
30  
31  
32  
33  
34  
35  
36  
37  
38  
39  
40  
41  
42  
43  
44  
45  
46  
47  
48  
49  
50  
51  
52  
53  
54  
55  
56  
57  
58  
59  
60

- Pflegesachleistungen für teilstationäre Pflege
- Pflegesachleistungen für vollstationäre Pflege
- zum Verbrauch bestimmte Pflegehilfsmittel

For peer review only



**IV Fragen zur psychotherapeutischen/psychopharmakologischen Behandlung****1) Nehmen Sie aktuell Medikamente gegen Ängste, Depression oder Schlafstörungen ein?**

- Nein
- Ja, folgende: \_\_\_\_\_
- Dosis \_\_\_\_\_
- Seit wann? \_\_\_\_\_

**2) Sind Sie aktuell in psychotherapeutischer/psychiatrischer Behandlung?**

- Nein
- Ja

Wie viele Sitzungen haben stattgefunden? \_\_\_\_\_ Sitzungen



1  
2  
3 Liebe Teilnehmerin, lieber Teilnehmer,  
4

5 Sie haben nun den letzten Fragebogen ausgefüllt und somit die Studie vollständig abgeschlossen.  
6 Vielen Dank! Durch Ihre Mithilfe können wir die Wirksamkeit des Make It Trainings ermitteln. Somit  
7 ermöglichen Sie, dass wir das Make It Training schon bald vielen Patientinnen und Patienten zur  
8 Verfügung stellen können.  
9

10  
11 Sollten Sie Fragen haben, können Sie gerne jederzeit eine E-Mail an [reduct@uni-due.de](mailto:reduct@uni-due.de) senden.  
12

13  
14 Vielen Dank für Ihre Teilnahme!

15  
16 Wir wünschen Ihnen alles Gute.

17  
18 Ihr Reduct Team  
19  
20  
21  
22  
23  
24  
25  
26  
27  
28  
29  
30  
31  
32  
33  
34  
35  
36  
37  
38  
39  
40  
41  
42  
43  
44  
45  
46  
47  
48  
49  
50  
51  
52  
53  
54  
55  
56  
57  
58  
59  
60

Teilnehmer-ID: \_\_\_\_\_

# Reduct- Web-Basierte Achtsamkeits- und Skillsbasierte Stressreduktion für Patientinnen und Patienten mit Krebs

## Darf der Abbruchfragebogen bei Studienabbruch verschickt werden?

Muss auf der Einwilligungserklärung angekreuzt sein

- Ja  Nein

## I. Onkologische Anamnese

1) Welche Tumorerkrankung (Primär Erkrankung für den Studieneinschluss) ist aktuell bzw. in den letzten 12 Monaten aufgetreten (Hier nur eine Auswahl treffen)?

- Kopf-Hals-Tumore (C00-14, C30-33)
- Oberer GI-Trakt (C15-16)
- Darm (C17-21)
- Leber/ Gallenblase (C22-24)
- Pankreas (C25)
- Lunge (C33-34)
- Haut (C43)
- Muskuloskelettale Tumore (C40-41, C45-49)
- Brust (D05, C50)
- weibl. Genitale (C51-56)
- männl. Genitale (C60-62)

- 1  
2  
3  Harnorgane (C64, C67)  
4  
5  Neuroonkologische Tumore (C70-72)  
6  
7  Endokrine Tumore (C73)  
8  
9  Lymphatisches, blutbildendes Gewebe (C81-85, C90-95)  
10  
11  Kopf-Hals-Tumore (C00-14, C30-33)  
12  
13  Cancer of Unknown Primary (CUP)  
14  
15  Andere, genaue Diagnosen: \_\_\_\_\_  
16  
17  
18  
19

## 2) Krankheitssituation

20  
21  
22  
23 2.1 TNM Stadium: T \_\_\_\_\_ N \_\_\_\_\_ M \_\_\_\_\_  
24

25 Falls TNM Klassifikation nicht auf Tumorerkrankung anwendbar, bitte hier das Tumorstadium  
26 spezifizieren:  
27

28  
29  
30  
31  
32  
33  
34  
35  
36

37 2.2 Ersterkrankung, Datum der Diagnosestellung \_\_\_\_\_  
38

39 2.3 Kam es zu einem Wiederauftreten der Erkrankung? (Rezidiv)  
40

- 41  Ja  Nein  
42  
43

44 Wann aufgetreten? \_\_\_\_\_  
45

46 Wo aufgetreten?

- 47  
48  Bauchspeicheldrüse  Harnblase  Blut  
49  
50  Darm  Gallenblase  Gebärmutter  
51  
52  Blutgefäße /Adern  Gehirn  Geschlechtsorgane  
53 (Hoden, Penis, Zervix, Vagina)  
54  Haut  Herz  Leber  
55  
56  Lunge  Magen  Milz  
57  
58  
59  
60



1  
2  
3  
4  
5 **5) Therapieform: Welche wurden oder werden aktuell angewendet?**  
6

7  
8  
9

|                                  | Aktuell                  | Abgeschlossen in den<br>letzten 12 Monaten | Vorher<br>abgeschlossen  |
|----------------------------------|--------------------------|--------------------------------------------|--------------------------|
| 10<br>11 Operation               | <input type="checkbox"/> | <input type="checkbox"/>                   | <input type="checkbox"/> |
| 12<br>13 Strahlentherapie        | <input type="checkbox"/> | <input type="checkbox"/>                   | <input type="checkbox"/> |
| 14<br>15 Chemotherapie           | <input type="checkbox"/> | <input type="checkbox"/>                   | <input type="checkbox"/> |
| 16<br>17 Antihormonelle Therapie | <input type="checkbox"/> | <input type="checkbox"/>                   | <input type="checkbox"/> |
| 18<br>19 Immuntherapie           | <input type="checkbox"/> | <input type="checkbox"/>                   | <input type="checkbox"/> |
| 20<br>21 Supportivtherapie       | <input type="checkbox"/> | <input type="checkbox"/>                   | <input type="checkbox"/> |
| 22<br>23 Zelltherapie            | <input type="checkbox"/> | <input type="checkbox"/>                   | <input type="checkbox"/> |
| 24<br>25 Stammzelltherapie       | <input type="checkbox"/> | <input type="checkbox"/>                   | <input type="checkbox"/> |
| 26<br>27 Keine                   | <input type="checkbox"/> | <input type="checkbox"/>                   | <input type="checkbox"/> |
| 28<br>29 Sonstige                | <input type="checkbox"/> | <input type="checkbox"/>                   | <input type="checkbox"/> |
| 30<br>31                         |                          |                                            |                          |
| 32<br>33                         |                          |                                            |                          |
| 34                               |                          |                                            |                          |

35 **II. Psychosomatische Anamnese**  
36

37 **1) Liegt oder lag eine psychische Begleiterkrankung vor**  
38

39  Nein

40

41  
42

|                                               | Aktuell                  | Zustand nach             |
|-----------------------------------------------|--------------------------|--------------------------|
| 43<br>44                                      |                          |                          |
| 45 Alkoholismus (F10.2)                       | <input type="checkbox"/> | <input type="checkbox"/> |
| 46 Bipolare Affektive Störung (F31)           | <input type="checkbox"/> | <input type="checkbox"/> |
| 47 Depressive Episode (F32)                   | <input type="checkbox"/> | <input type="checkbox"/> |
| 48 Rezidivierende Depressive Störung (F33)    | <input type="checkbox"/> | <input type="checkbox"/> |
| 49 Panikstörung (F41.0)                       | <input type="checkbox"/> | <input type="checkbox"/> |
| 50 Generalisierte Angststörung (F41.1)        | <input type="checkbox"/> | <input type="checkbox"/> |
| 51 Zwangsstörung (F42)                        | <input type="checkbox"/> | <input type="checkbox"/> |
| 52 Posttraumatische Belastungsstörung (F43.1) | <input type="checkbox"/> | <input type="checkbox"/> |
| 53 Anpassungsstörung (F43.2)                  | <input type="checkbox"/> | <input type="checkbox"/> |
| 54 Essstörung (F50)                           | <input type="checkbox"/> | <input type="checkbox"/> |
| 55                                            |                          |                          |
| 56                                            |                          |                          |
| 57                                            |                          |                          |
| 58                                            |                          |                          |
| 59                                            |                          |                          |
| 60                                            |                          |                          |

Andere, nämlich (Bezeichnung und ICD Code angeben): \_\_\_\_\_   Ja, und zwar:

**2) Aktuelle Einnahme von Psychopharmaka:**

- Nein
- Ja, folgende: \_\_\_\_\_  
 Dosis \_\_\_\_\_  
 Seit wann? \_\_\_\_\_  
 Stabile Dosis  Ja  Nein

**3) Aktuelle oder vergangene psychotherapeutische/psychosomatische/psychiatrische Behandlung:**

|                                        |                          |                                               |                                     |
|----------------------------------------|--------------------------|-----------------------------------------------|-------------------------------------|
| <input type="checkbox"/> Keine         |                          |                                               |                                     |
| <input type="checkbox"/> Ja, folgende: |                          |                                               |                                     |
|                                        | Aktuell                  | Abgeschlossen innerhalb der letzten 12 Monate | Vorher abgeschlossen                |
| Psychoonkologische Behandlung          | <input type="checkbox"/> | <input type="checkbox"/>                      | <input type="checkbox"/>            |
| Ambulante Psychotherapie               | <input type="checkbox"/> | <input type="checkbox"/>                      | <input type="checkbox"/>            |
| Psychosomatischer Klinikaufenthalt     | <input type="checkbox"/> | <input type="checkbox"/>                      | <input type="checkbox"/>            |
| Psychiatrischer Klinikaufenthalt       | <input type="checkbox"/> | <input type="checkbox"/>                      | <input checked="" type="checkbox"/> |

Andere

---

### III. Gesundheitsökonomische Fragen

#### 1. Lag bei Ihnen innerhalb der letzten 3 Monate eine Arbeitsunfähigkeit (AU) vor?

- nein  
 ja

wenn ja, bitte geben Sie den Zeitraum jeder AU mit Datum an und fassen dabei die Dauer für jede zusammenhängende AU (Folgebescheinigungen) wegen derselben Erkrankung zusammen.

1. AU: von \_\_\_\_\_.\_\_\_\_.\_\_\_\_ (TT.MM.JJJJ) bis \_\_\_\_\_.\_\_\_\_.\_\_\_\_ (TT.MM.JJJJ)
2. AU: von \_\_\_\_\_.\_\_\_\_.\_\_\_\_ (TT.MM.JJJJ) bis \_\_\_\_\_.\_\_\_\_.\_\_\_\_ (TT.MM.JJJJ)
3. AU: von \_\_\_\_\_.\_\_\_\_.\_\_\_\_ (TT.MM.JJJJ) bis \_\_\_\_\_.\_\_\_\_.\_\_\_\_ (TT.MM.JJJJ)
4. AU: von \_\_\_\_\_.\_\_\_\_.\_\_\_\_ (TT.MM.JJJJ) bis \_\_\_\_\_.\_\_\_\_.\_\_\_\_ (TT.MM.JJJJ)
5. AU: von \_\_\_\_\_.\_\_\_\_.\_\_\_\_ (TT.MM.JJJJ) bis \_\_\_\_\_.\_\_\_\_.\_\_\_\_ (TT.MM.JJJJ)

#### 2. Bezogen Sie in den letzten 3 Monaten bzw. beziehen Sie aktuell Krankengeld?

- nein  
 ja

wenn ja, geben Sie bitte den Zeitraum des Krankengeldbezugs an:

von \_\_\_\_\_.\_\_\_\_.\_\_\_\_ (TT.MM.JJJJ) bis \_\_\_\_\_.\_\_\_\_.\_\_\_\_ (TT.MM.JJJJ)

#### 3. Hatten Sie innerhalb der letzten 3 Monate Kontakt mit einer ambulanten Arztpraxis (inkl. Rezept/Überweisung abholen, Blutabnahme, telefonische Beratung, Impfung und Hausbesuch)? Bitte beziehen Sie Arztkontakte im Rahmen der Reduct-Studie nicht ein.

- nein  
 ja, welche:

- Hausärztin/ Hausarzt Anzahl Besuche: \_\_\_\_  
 Augenärztin/ Augenarzt Anzahl Besuche: \_\_\_\_  
 Chirurgin/ Chirurg: Anzahl Besuche: \_\_\_\_  
 Gynäkologin/Gynäkologe: Anzahl Besuche: \_\_\_\_





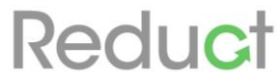

- 1  
2  
3  Stationär  
4  
5  Teilstationär (Tages-/Nachklinik)  
6  
7  andere Abteilungen (primär körperliche Erkrankungen/Behandlungen)  
8

9 Aufenthalt 3 von \_\_\_\_\_.\_\_\_\_(TT.MM.JJJJ) bis \_\_\_\_\_.\_\_\_\_(TT.MM.JJJJ)

- 10  Psychiatrisch-psychotherapeutische Behandlung  
11  
12  Psychosomatisch-psychotherapeutische Behandlung  
13  
14  Stationär  
15  
16  Teilstationär (Tages-/Nachklinik)  
17  
18  andere Abteilungen (primär körperliche Erkrankungen/Behandlungen)  
19

20 **5. Haben Sie innerhalb der letzten 3 Monate an einer Rehabilitations-Maßnahme**  
21 **teilgenommen?**  
22

- 23  
24  nein  
25  
26  ja

27 wenn ja, geben Sie bitte den Zeitraum des Reha-Aufenthaltes an und machen Angaben zum  
28 Grund des Aufenthaltes, zur Abteilung und zur Unterbringungsform:  
29

30  
31 Aufenthalt 1 von \_\_\_\_\_.\_\_\_\_(TT.MM.JJJJ) bis \_\_\_\_\_.\_\_\_\_(TT.MM.JJJJ)

- 32  andere Abteilungen (primär körperliche Erkrankungen/ Behandlungen)  
33  
34  wegen einer sonstigen psychischen Erkrankung  
35  
36  Stationär  
37  
38  Teilstationär (Tages-/Nachklinik)

39 Aufenthalt 2 von \_\_\_\_\_.\_\_\_\_(TT.MM.JJJJ) bis \_\_\_\_\_.\_\_\_\_(TT.MM.JJJJ)

- 40  
41  andere Abteilungen (primär körperliche Erkrankungen/ Behandlungen)  
42  
43  wegen einer sonstigen psychischen Erkrankung  
44  
45  Stationär  
46  
47  Teilstationär (Tages-/Nachklinik)

48 **6. Haben Sie innerhalb der letzten 3 Monate Medikamente eingenommen?**  
49

- 50  nein  ja

51 wenn ja, geben Sie bitte den Medikamentennamen/Wirkstoff an, die Ihnen von einem Arzt  
52 verordnet wurden, die Dosis pro Tag und die Einnahmedauer an:  
53

54 1. Medikament: \_\_\_\_\_ Tagesdosis: \_\_\_\_\_

55 Einnahme von \_\_\_\_\_.\_\_\_\_(TT.MM.JJJJ) bis \_\_\_\_\_.\_\_\_\_(TT.MM.JJJJ), ganzer Zeitraum

56  
57  
58 2. Medikament: \_\_\_\_\_ Tagesdosis: \_\_\_\_\_  
59  
60

1  
2  
3 Einnahme von \_\_\_\_\_.\_\_\_\_(TT.MM.JJJJ) bis \_\_\_\_\_.\_\_\_\_(TT.MM.JJJJ), ganzer Zeitraum   
4  
5

6 3. Medikament: \_\_\_\_\_ Tagesdosis: \_\_\_\_\_

7 Einnahme von \_\_\_\_\_.\_\_\_\_(TT.MM.JJJJ) bis \_\_\_\_\_.\_\_\_\_(TT.MM.JJJJ), ganzer Zeitraum   
8  
9

10 4. Medikament: \_\_\_\_\_ Tagesdosis: \_\_\_\_\_

11 Einnahme von \_\_\_\_\_.\_\_\_\_(TT.MM.JJJJ) bis \_\_\_\_\_.\_\_\_\_(TT.MM.JJJJ), ganzer Zeitraum   
12  
13

14 5. Medikament: \_\_\_\_\_ Tagesdosis: \_\_\_\_\_

15 Einnahme von \_\_\_\_\_.\_\_\_\_(TT.MM.JJJJ) bis \_\_\_\_\_.\_\_\_\_(TT.MM.JJJJ), ganzer Zeitraum   
16  
17

18 6. Medikament: \_\_\_\_\_ Tagesdosis: \_\_\_\_\_

19 Einnahme von \_\_\_\_\_.\_\_\_\_(TT.MM.JJJJ) bis \_\_\_\_\_.\_\_\_\_(TT.MM.JJJJ), ganzer Zeitraum   
20  
21  
22  
23  
24  
25  
26  
27  
28  
29  
30  
31  
32  
33  
34  
35  
36  
37  
38  
39  
40  
41  
42  
43  
44  
45  
46  
47  
48  
49  
50  
51  
52  
53  
54  
55  
56  
57  
58  
59  
60

1  
2  
3  
4  
5  
6 **7. Haben Sie innerhalb der letzten 3 Monate Heilmittel in Anspruch genommen (z.B.**  
7 **Physiotherapie, Logopädie, Ergotherapie)?**

8  nein

9  ja

10  Physiotherapie: Anzahl Besuche: \_\_\_\_

11  
12  Logopädie: Anzahl Besuche: \_\_\_\_

13  
14  
15  Ergotherapie/Arbeitstherapie: Anzahl Besuche: \_\_\_\_

16  
17  Soziotherapie: Anzahl Besuche: \_\_\_\_

18  
19  Tanztherapie/Bewegungstherapie: Anzahl Besuche: \_\_\_\_

20  
21  Einzel  Gruppe

22  
23  Kreativtherapie: Anzahl Besuche: \_\_\_\_

24  
25  Einzel  Gruppe

26  
27  Kunsttherapie: Anzahl Besuche: \_\_\_\_

28  
29  Einzel  Gruppe

30  
31  Musiktherapie: Anzahl Besuche: \_\_\_\_

32  
33  Einzel  Gruppe

34  
35  Theatertherapie: Anzahl Besuche: \_\_\_\_

36  
37  Einzel  Gruppe

38  
39  Entspannungstechniken (autogenes Training) /progressive  
40 Muskelentspannung): Anzahl Besuche: \_\_\_\_

41  
42  Einzel  Gruppe

43  
44  sonstige, und zwar: \_\_\_\_\_ Anzahl Besuche: \_\_\_\_

45  
46  Einzel  Gruppe

1  
2  
3  
4  
5  
6 **8. Haben Sie innerhalb der letzten 3 Monate folgende Angebote in Anspruch genommen?**  
7

8 **(Nicht im Rahmen eines ambulanten Arzt-/Psychotherapeutenkontaktes oder**  
9 **Krankenhauskontakt)**  
10

11  
12  
13  Psychoonkologische Beratungsstelle:

14 Anzahl Kontakte: \_\_\_ durchschnittliche Dauer pro Kontakt: \_\_\_\_\_ Minuten  
15

16  
17  Beratungsstelle bei psychischen Problemen:

18 Anzahl Kontakte: \_\_\_ durchschnittliche Dauer pro Kontakt: \_\_\_\_\_ Minuten  
19

20  
21  Sozialpsychiatrischer Dienst/Psychosozialer Krisendienst:

22 Anzahl Kontakte: \_\_\_ durchschnittliche Dauer pro Kontakt: \_\_\_\_\_ Minuten  
23

24  
25  Tagesstätten/Kontaktstätten für Menschen mit psychischen Problemen:

26 Anzahl Kontakte: \_\_\_ durchschnittliche Dauer pro Kontakt: \_\_\_\_\_ Minuten  
27

28  
29  Selbsthilfegruppen aufgrund psychischer Probleme:

30 Anzahl Kontakte: \_\_\_ durchschnittliche Dauer pro Kontakt: \_\_\_\_\_ Minuten  
31

32  
33  weitere Angebote aufgrund psychischer Probleme (z.B. Sorgentelefon)

34 und zwar: \_\_\_\_\_  
35

36 Anzahl Kontakte: \_\_\_ durchschnittliche Dauer pro Kontakt: \_\_\_\_\_ Minuten  
37  
38  
39

40  
41 **9. Bitte geben Sie an, ob bei Ihnen aktuell ein **Pflegegrad** vorliegt.**

42  nein

43  ja, seit \_\_\_\_\_

44  Pflegegrad 1

45  Pflegegrad 2

46  Pflegegrad 3

47  Pflegegrad 4

48  Pflegegrad 5  
49  
50  
51  
52

53 **10. Bitte geben Sie an, ob Sie Leistungen der Pflegekasse beziehen.**

54  nein

55  ja

56  Pflegegeld für häusliche Pflege

57  Pflegesachleistungen für häusliche Pflege  
58  
59  
60

- kombinierte Pflegegeld und Pflegesachleistung
- Entlastungsbetrag bei häuslicher Pflege
- Wohnumfeld verbessernde Maßnahmen
- Pflegesachleistungen für teilstationäre Pflege
- Pflegesachleistungen für vollstationäre Pflege
- zum Verbrauch bestimmte Pflegehilfsmittel

#### IV. Ihr derzeitiges Befinden

Bitte beantworten Sie im Folgenden, wie sehr die jeweilige Aussage in der letzten Woche auf Sie zutraf.

1.1. Ich fühle mich angespannt oder überreizt.

- 3 meistens
- 2 oft
- 1 von Zeit zu Zeit/ gelegentlich
- 0 überhaupt nicht

1.2. Ich fühle mich in meinen Aktivitäten gebremst.

- 3 fast immer
- 2 sehr oft
- 1 manchmal
- 0 überhaupt nicht

1.3. Ich kann mich heute noch so freuen wie früher.

- 0 ganz genau so
- 1 nicht ganz so sehr
- 2 Nur noch ein wenig
- 3 kaum oder gar nicht

1.4. Ich habe manchmal ein ängstliches Gefühl in der Magengegend.

- 0 überhaupt nicht
- 1 gelegentlich
- 2 ziemlich oft
- 3 sehr oft

1.5. Mich überkommt eine ängstliche Vorahnung, dass etwas Schreckliches passieren könnte.

- 3 ja, sehr stark
- 2 ja, aber nicht allzu stark
- 1 etwas, aber es macht mir keine Sorgen
- 0 überhaupt nicht

1.6. Ich habe das Interesse an meiner äußeren Erscheinung verloren.

- 3 ja, stimmt genau
- 2 ich kümmere mich nicht so sehr darum, wie ich sollte
- 1 möglicherweise kümmere ich mich zu wenig darum

1  
2  
3  
4  
5  
6  
7  
8  
9  
10  
11  
12  
13  
14  
15  
16  
17  
18  
19  
20  
21  
22  
23  
24  
25  
26  
27  
28  
29  
30  
31  
32  
33  
34  
35  
36  
37  
38  
39  
40  
41  
42  
43  
44  
45  
46  
47  
48  
49  
50  
51  
52  
53  
54  
55  
56  
57  
58  
59  
60

0 ich kümmere mich so viel darum wie immer

1.7. Ich kann lachen und die lustige Seite der Dinge sehen.

0 ja, so viel wie immer  
1 nicht mehr ganz so viel  
2 inzwischen viel weniger  
3 überhaupt nicht

1.8. Ich fühle mich rastlos, muss immer in Bewegung sein.

3 ja, tatsächlich sehr  
2 ziemlich  
1 nicht sehr  
0 überhaupt nicht

1.9. Mir gehen beunruhigende Gedanken durch den Kopf.

3 einen Großteil der Zeit  
2 verhältnismäßig oft  
1 von Zeit zu Zeit, aber nicht allzu oft  
0 nur gelegentlich/nie

1.10. Ich blicke mit Freude in die Zukunft.

0 ja, sehr  
1 eher weniger als früher  
2 viel weniger als früher  
3 kaum bis gar nicht

1.11. Ich fühle mich glücklich.

3 überhaupt nicht  
2 selten  
1 manchmal  
0 meistens

1.12. Mich überkommt plötzlich ein panikartiger Zustand.

3 ja, tatsächlich sehr oft  
2 ziemlich oft  
1 nicht sehr oft  
0 überhaupt nicht

1.13. Ich kann behaglich dasitzen und mich entspannen.

0 ja, natürlich  
1 gewöhnlich schon  
2 nicht oft  
3 überhaupt nicht

1.14. Ich kann mich an einem guten Buch, einer Radio- oder Fernsehsendung erfreuen.

0 oft  
1 manchmal  
2 Eher selten  
3 Sehr selten

1  
2  
3  
4  
5  
6  
7  
8  
9  
10  
11  
12  
13  
14  
15  
16  
17  
18  
19  
20  
21  
22  
23  
24  
25  
26  
27  
28  
29  
30  
31  
32  
33  
34  
35  
36  
37  
38  
39  
40  
41  
42  
43  
44  
45  
46  
47  
48  
49  
50  
51  
52  
53  
54  
55  
56  
57  
58  
59  
60

For peer review only



# BMJ Open

## Web-based Mindfulness and Skills Based Distress Reduction for Cancer Patients - Study Protocol of the Multicentre, Randomized, Controlled Confirmatory Intervention Trial Reduct

|                               |                                                                                                                                                                                                                                                                                                                                                                                                                                                                                                                                                                                                                                                                                                                                                                                                                                                                                                                                                                                                                                                                                                                                                                                                                                                                                                                                                                                                                                                                                                                                                                                                                                                                                                                                                                                                                                                                                                                                                                                                                                                                                                                                                                                                                                                                                                             |
|-------------------------------|-------------------------------------------------------------------------------------------------------------------------------------------------------------------------------------------------------------------------------------------------------------------------------------------------------------------------------------------------------------------------------------------------------------------------------------------------------------------------------------------------------------------------------------------------------------------------------------------------------------------------------------------------------------------------------------------------------------------------------------------------------------------------------------------------------------------------------------------------------------------------------------------------------------------------------------------------------------------------------------------------------------------------------------------------------------------------------------------------------------------------------------------------------------------------------------------------------------------------------------------------------------------------------------------------------------------------------------------------------------------------------------------------------------------------------------------------------------------------------------------------------------------------------------------------------------------------------------------------------------------------------------------------------------------------------------------------------------------------------------------------------------------------------------------------------------------------------------------------------------------------------------------------------------------------------------------------------------------------------------------------------------------------------------------------------------------------------------------------------------------------------------------------------------------------------------------------------------------------------------------------------------------------------------------------------------|
| Journal:                      | <i>BMJ Open</i>                                                                                                                                                                                                                                                                                                                                                                                                                                                                                                                                                                                                                                                                                                                                                                                                                                                                                                                                                                                                                                                                                                                                                                                                                                                                                                                                                                                                                                                                                                                                                                                                                                                                                                                                                                                                                                                                                                                                                                                                                                                                                                                                                                                                                                                                                             |
| Manuscript ID                 | bmjopen-2021-056973.R2                                                                                                                                                                                                                                                                                                                                                                                                                                                                                                                                                                                                                                                                                                                                                                                                                                                                                                                                                                                                                                                                                                                                                                                                                                                                                                                                                                                                                                                                                                                                                                                                                                                                                                                                                                                                                                                                                                                                                                                                                                                                                                                                                                                                                                                                                      |
| Article Type:                 | Protocol                                                                                                                                                                                                                                                                                                                                                                                                                                                                                                                                                                                                                                                                                                                                                                                                                                                                                                                                                                                                                                                                                                                                                                                                                                                                                                                                                                                                                                                                                                                                                                                                                                                                                                                                                                                                                                                                                                                                                                                                                                                                                                                                                                                                                                                                                                    |
| Date Submitted by the Author: | 26-Apr-2022                                                                                                                                                                                                                                                                                                                                                                                                                                                                                                                                                                                                                                                                                                                                                                                                                                                                                                                                                                                                                                                                                                                                                                                                                                                                                                                                                                                                                                                                                                                                                                                                                                                                                                                                                                                                                                                                                                                                                                                                                                                                                                                                                                                                                                                                                                 |
| Complete List of Authors:     | <p>Bäuerle, Alexander; University of Duisburg-Essen, Clinic for Psychosomatic Medicine and Psychotherapy, LVR-University Hospital; University Hospital Essen, Comprehensive Cancer Center (CCC)</p> <p>Martus, Peter; University Hospital Tübingen, Institute of Clinical Epidemiology and Applied Biostatistics, Eberhard Karls University Tübingen</p> <p>Erim, Yesim; University Hospital Erlangen, Department of Psychosomatic Medicine and Psychotherapy, Friedrich-Alexander-University Erlangen-Nürnberg</p> <p>Schug, Caterina; University Hospital Erlangen, Department of Psychosomatic Medicine and Psychotherapy, Friedrich-Alexander-University Erlangen-Nürnberg</p> <p>Heinen, Jana; University Hospital Tübingen, Department of Psychosomatic Medicine and Psychotherapy, Eberhard Karls University; University Hospital Tübingen, Comprehensive Cancer Center (CCC)</p> <p>Krakowczyk, Julia; University of Duisburg-Essen, Clinic for Psychosomatic Medicine and Psychotherapy, LVR-University Hospital; University Hospital Essen, Comprehensive Cancer Center (CCC)</p> <p>Steinbach, Jasmin; University of Duisburg-Essen, Clinic for Psychosomatic Medicine and Psychotherapy, LVR-University Hospital; University Hospital Essen, Comprehensive Cancer Center (CCC)</p> <p>Damerau, Mirjam; University of Duisburg-Essen, Clinic for Psychosomatic Medicine and Psychotherapy, LVR-University Hospital; University Hospital Essen, Comprehensive Cancer Center (CCC)</p> <p>Bethge, Wolfgang; University Hospital Tübingen, Centre of Clinical Trials (ZKS) Tübingen, Eberhard Karls University Tübingen</p> <p>Dinkel, Andreas; Technical University of Munich, Department of Psychosomatic Medicine and Psychotherapy, Klinikum rechts der Isar, School of Medicine</p> <p>Dries, Sebastian; Fraunhofer Institute for Software and Systems Engineering, Healthcare Department</p> <p>Mehnert, Anja ; University Medical Center Leipzig, Department of Medical Psychology and Medical Sociology</p> <p>Neumann, Anja; University of Duisburg-Essen, Institute of Health Care Management and Research</p> <p>Schadendorf, Dirk; University Hospital Essen, Department of Dermatology, University of Duisburg-Essen; University Hospital Essen, Comprehensive Cancer Center (CCC)</p> |

|                                 |                                                                                                                                                                                                                                                                                                                                                                                                                                                                                                                                                                                                                                                                                                                                                                                                                                                                                                                                                                                                                                                                 |
|---------------------------------|-----------------------------------------------------------------------------------------------------------------------------------------------------------------------------------------------------------------------------------------------------------------------------------------------------------------------------------------------------------------------------------------------------------------------------------------------------------------------------------------------------------------------------------------------------------------------------------------------------------------------------------------------------------------------------------------------------------------------------------------------------------------------------------------------------------------------------------------------------------------------------------------------------------------------------------------------------------------------------------------------------------------------------------------------------------------|
|                                 | Tewes, Mitra; University Hospital Essen, Department of Medical Oncology, University of Duisburg-Essen; University Hospital Essen, Comprehensive Cancer Center (CCC)<br>Wiltink, Jörg; University Medical Center of the Johannes Gutenberg-University Mainz, Department of Psychosomatic Medicine and Psychotherapy<br>Wünsch, Alexander; Freiburg Medical Center, Clinic for Psychosomatic Medicine and Psychotherapy, Albert-Ludwigs-Universität Freiburg<br>Zipfel, Stephan; University Hospital Tübingen, Department of Psychosomatic Medicine and Psychotherapy, Eberhard Karls University ; University Hospital Tübingen, Comprehensive Cancer Center (CCC)<br>Graf, Johanna; University Hospital Tübingen, Department of Psychosomatic Medicine and Psychotherapy, Eberhard Karls University; University Hospital Tübingen, Comprehensive Cancer Center (CCC)<br>Teufel, Martin; University of Duisburg-Essen, Clinic for Psychosomatic Medicine and Psychotherapy, LVR-University Hospital; University Hospital Essen, Comprehensive Cancer Center (CCC) |
| <b>Primary Subject Heading</b>: | Oncology                                                                                                                                                                                                                                                                                                                                                                                                                                                                                                                                                                                                                                                                                                                                                                                                                                                                                                                                                                                                                                                        |
| Secondary Subject Heading:      | Mental health                                                                                                                                                                                                                                                                                                                                                                                                                                                                                                                                                                                                                                                                                                                                                                                                                                                                                                                                                                                                                                                   |
| Keywords:                       | ONCOLOGY, Telemedicine < BIOTECHNOLOGY & BIOINFORMATICS, MENTAL HEALTH                                                                                                                                                                                                                                                                                                                                                                                                                                                                                                                                                                                                                                                                                                                                                                                                                                                                                                                                                                                          |
|                                 |                                                                                                                                                                                                                                                                                                                                                                                                                                                                                                                                                                                                                                                                                                                                                                                                                                                                                                                                                                                                                                                                 |

SCHOLARONE™  
Manuscripts

1  
2  
3 **Web-based Mindfulness and Skills Based Distress Reduction for Cancer Patients**  
4 **- Study Protocol of the Multicentre, Randomized, Controlled Confirmatory**  
5 **Intervention Trial Reduct**  
6  
7

8  
9 Alexander Bäuerle<sup>1,2</sup>, Peter Martus<sup>3</sup>, Yesim Erim<sup>4</sup>, Caterina Schug<sup>4</sup>, Jana Heinen<sup>5,6</sup>, Julia  
10 Barbara Krakowczyk<sup>1,2</sup>, Jasmin Steinbach<sup>1,2</sup>, Mirjam Damerau<sup>1,2</sup>, Wolfgang Bethge<sup>7</sup>,  
11 Andreas Dinkel<sup>8</sup>, Sebastian Dries<sup>9</sup>, Anja Mehnert-Theuerkauf<sup>10</sup>, Anja Neumann<sup>11</sup>, Dirk  
12 Schadendorf<sup>12,2</sup>, Mitra Tewes<sup>13,2</sup>, Jörg Wiltink<sup>14</sup>, Alexander Wunsch<sup>15</sup>, Stephan Zipfel<sup>5,6</sup>,  
13 Johanna Graf<sup>5,6+</sup>, Martin Teufel<sup>1,2+\*</sup>  
14  
15  
16

17  
18 <sup>1</sup>University of Duisburg-Essen, Clinic for Psychosomatic Medicine and Psychotherapy, LVR-  
19 University Hospital Essen  
20

21  
22 <sup>2</sup>University Hospital Essen, Comprehensive Cancer Center (CCC)  
23

24  
25 <sup>3</sup>Institute of Clinical Epidemiology and Applied Biostatistics (IKEaB), University Hospital  
26 Tübingen, Eberhard Karls University Tübingen  
27  
28

29  
30 <sup>4</sup>Department of Psychosomatic Medicine and Psychotherapy, University Hospital Erlangen,  
31 Friedrich-Alexander-University Erlangen-Nürnberg  
32

33  
34 <sup>5</sup>Department of Psychosomatic Medicine and Psychotherapy, University Hospital  
35 Tübingen, Eberhard Karls University  
36  
37

38  
39 <sup>6</sup>University Hospital Tübingen, Comprehensive Cancer Center (CCC)  
40

41  
42 <sup>7</sup>Centre of Clinical Trials (ZKS) Tübingen, University Hospital Tübingen, Eberhard Karls  
43 University Tübingen  
44  
45

46  
47 <sup>8</sup>Department of Psychosomatic Medicine and Psychotherapy, Klinikum rechts der Isar,  
48 School of Medicine, Technical University of Munich  
49

50  
51 <sup>9</sup>Fraunhofer Institute for Software and Systems Engineering, Healthcare Department  
52

53  
54 <sup>10</sup>Department of Medical Psychology and Medical Sociology, University Medical Center  
55 Leipzig  
56  
57

58  
59 <sup>11</sup>University of Duisburg-Essen, Institute of Health Care Management and Research  
60

1  
2  
3 <sup>12</sup>Department of Dermatology, University Hospital Essen, University of Duisburg-Essen  
4  
5

6 <sup>13</sup>Department of Medical Oncology, University Hospital Essen, University of Duisburg-  
7 Essen  
8  
9

10 <sup>14</sup>Department of Psychosomatic Medicine and Psychotherapy, University Medical Center of  
11 the Johannes Gutenberg- University Mainz  
12  
13

14 <sup>15</sup>Clinic for Psychosomatic Medicine and Psychotherapy, Freiburg Medical Center, Albert-  
15 Ludwigs-Universität Freiburg  
16  
17

18  
19  
20 +JG and MT contributed equally.  
21

22  
23 \*Corresponding author: Martin Teufel, University of Duisburg-Essen, Clinic for  
24 Psychosomatic Medicine and Psychotherapy, LVR-University Hospital Essen,  
25 martin.teufel@uni-due.de  
26  
27

## 28 29 **Abstract**

30 Introduction: Many cancer patients experience severe psychological distress, but as a  
31 result of various barriers, few of them receive psycho-oncological support. E-mental health  
32 interventions try to overcome some of these barriers and the limitation of health-care  
33 offers, enabling cancer patients to better cope with psychological distress. In the proposed  
34 trial, we aim to estimate the efficacy and cost-effectiveness of the manualized e-mental  
35 health intervention Make It Training- Mindfulness- and Skills-Based Distress Reduction in  
36 Oncology. Make It Training is a self-guided and web-based psycho-oncological intervention,  
37 which includes elements of cognitive behavioural therapy, mindfulness-based stress  
38 reduction, and acceptance and commitment therapy. The training supports the patients  
39 over a period of four months. We expect the Make It Training to be superior to treatment  
40 as usual optimized (TAU-O) in terms of reducing psychological distress after completing  
41 the intervention (T1, primary endpoint).  
42  
43

44 Methods and analysis: The study comprises a multicentre, prospective, randomized  
45 controlled confirmatory interventional trial with two parallel arms. The proposed trial  
46 incorporates four distinct measurement time points: the baseline assessment before  
47 randomization, a post-treatment assessment, and three- and six-month follow-up  
48 assessments. We will include patients who have received a cancer diagnosis in the past 12  
49 months, are in a curative treatment setting, are 18-65 years old, have given informed  
50 consent, and experience high perceived psychological distress (Hospital Anxiety and  
51 Depression Scale  $\geq 13$ ) for at least one week. Patients will be randomized into two groups  
52 (Make It vs. TAU-O). The aim is to allocate 600 cancer patients and include 556 into the  
53  
54  
55  
56  
57  
58  
59  
60

1  
2  
3 intention to treat analysis. The primary endpoint, distress, will be analysed using a  
4 baseline-adjusted ANCOVA for distress measurement once the intervention (T1) has been  
5 completed, with study arm as a binary factor, baseline as continuous measurement, and  
6 study centre as an additional categorical covariate.  
7

8  
9 Ethics and dissemination: The Ethics Committee of the Medical Faculty Essen has approved  
10 the study (21-10076-BO). Results will be published in peer-reviewed journals, conference  
11 presentations, the project website, and among self-help organizations.  
12

13 Trial registration: The Reduct trial is registered at the German Clinical Trial Register (DRKS)  
14 under the DRKS-ID: DRKS00025213.  
15  
16

### 17 18 **Strength and limitation of this study**

- 19  
20 - This prospective multicentre, randomized, controlled confirmatory intervention trial was  
21 developed using scientific evidence, theory and person-based practically orientated  
22 approaches.  
23  
24 - The intervention of this study provides low-threshold, time- and cost-effective support.  
25  
26 - The study only includes patients with access to the internet, as access is required in the  
27 intervention.  
28  
29

### 30 31 **Introduction**

32 In 2020, there were an estimated number of 19.3 million new cancer cases and almost  
33 10.0 million cancer deaths occurred worldwide.[1] Many cancer patients experience  
34 multiple physical and psychosocial problems during treatment and even for years  
35 afterward.[2] Every second cancer patient is significantly distressed and one-third of all  
36 cancer patients across tumour entities meet the criteria for at least one mental disorder at  
37 4-week prevalence.[3, 4] The results from the study of Mehnert and colleagues reveal that  
38 52.2% and 48.2% of patients with tumor stage one and two report elevated distress,  
39 respectively.[3] Indicating that, many patients in earlier tumor stages show high distress  
40 levels. The meta-analysis from Mitchell et al., published in Lancet Oncology concluded that  
41 the distress levels of patients in palliative and non-palliative care are comparable.[5]  
42 Concluding from these results, patients in palliative and non-palliative care are comparably  
43 burdened. However, the needs and demands are different between patients in palliative  
44 and non-palliative care. In cancer patients, distress strongly affects all aspects of their lives  
45 (e.g., work-life, family life), leads to decreased quality of life, causes financial problems,  
46 and results in a 4.4-fold higher risk of suicide compared to the general population.[6-8] In  
47 addition, adherence to cancer treatment can decrease due to severe distress.[9]  
48  
49 Cancer patients who used e-mental health interventions experienced significantly reduced  
50 levels of distress, depression, pain, fatigue, and anxiety.[10-18] E-mental health  
51 interventions have proven to be feasible and effective in improving quality of life.[10-18]  
52  
53 Recent scientific findings extend their effectiveness by suggesting significant effects on  
54  
55  
56  
57  
58  
59  
60

1  
2  
3 well-being in terms of distress, depression, and anxiety[11, 16-20], especially for web-  
4 based interventions that included cognitive behavioural therapy (CBT) techniques  
5 acceptance and commitment therapy (ACT), and mindfulness-based stress reduction  
6 (MBSR).[10-22] Matis and colleagues conclude in their systematic literature review that  
7 mindfulness-based eHealth interventions are feasible and effective in improving different  
8 outcomes in cancer patients [23]. Particularly in improving depression, anxiety, and post-  
9 traumatic growth. Different e-mental health interventions combined CBT and mindfulness  
10 techniques to support cancer patients. Internet mindfulness-based cognitive therapy  
11 (iMBCT) showed promising results in terms of psychological distress, depression and  
12 anxiety symptoms, and fear of cancer recurrence.[24] One trial evaluating a therapist-  
13 assisted internet-based MBCT intervention for breast and prostate cancer survivors showed  
14 reduced depression and anxiety symptoms at post-intervention.[22] The effect was  
15 sustained for anxiety, but not for depression. In addition, two recent reviews on e-mental  
16 health interventions in (i) patients with breast cancer and (ii) young adult patients  
17 emphasized the impact of e-mental health interventions and stressed the need for well-  
18 designed multicentre RCTs.[25, 26] Overall, interventions aiming to reduce distress in  
19 cancer patients often make use of CBT, MBSR, and ACT, as they are effective approaches  
20 adapted to the need of cancer patients.[27] MBSR and ACT belong to the so-called "third-  
21 wave" CBT approaches which means that they are commonly integrated into CBT to  
22 support the patients need with a more holistic view on mental health.[28] In the treatment  
23 of cancer patients, a combination of these approaches seems promising, as they all contain  
24 different techniques that uniquely address the psychological burden associated with the  
25 disease.[27] Previous research shows that web-based interventions to reduce  
26 psychological distress in cancer patients including CBT, MBSR, or ACT have been proven  
27 to be effective.[10-26] Within these web-based interventions, different combinations such  
28 as CBT and MBSR, CBT and ACT, or ACT and MBSR have been used.[10-26, 29, 30]  
29 However, there is lack of research assessing the efficacy of web-based interventions using  
30 CBT, MBSR, and ACT altogether in a RCT. Designing a web-based intervention based on  
31 an integrative approach seems promising, as it offers a holistic treatment to elevate  
32 psychological distress in cancer patients. Based on these findings, we propose to conduct  
33 the first multicentre prospective RCT on the efficacy of a self-guided e-mental health  
34 intervention, including CBT, MBSR, and ACT techniques, Make It Training - Mindfulness  
35 and Skills Based Distress Reduction Training in Oncology, tailored to reduce distress and  
36 achieve well-being in patients with cancer.  
37  
38  
39  
40  
41  
42  
43  
44  
45  
46  
47  
48  
49  
50  
51  
52  
53  
54  
55

### 56 **Objectives and hypotheses**

57 The objective of the proposed trial is to address distress in cancer patients and provide a  
58 low-threshold, cost-effective approach in the form of an e-mental health intervention. We  
59  
60

1  
2  
3 aim to assess the efficacy of the e-mental health intervention Make It Training compared  
4 to treatment as usual optimized (TAU-O) in distressed cancer patients.  
5  
6

7 *Primary hypothesis:* We expect the Make It Training to be superior to TAU-O in terms of  
8 reducing distress (T1) in cancer patients.  
9

10 *Secondary hypotheses:* We expect the Make It Training to be superior to TAU-O in terms  
11 of improving self-efficacy, quality of life, and mindfulness, and reducing depression and  
12 anxiety symptoms (T1, T2 & T3) as well as distress (T2 & T3) in patients with cancer.  
13

14 *Other study goals* are to evaluate client satisfaction, usability, time to dropout, and cost-  
15 effectiveness of the proposed intervention Make It Training compared to TAU-O.  
16 Furthermore, additional study aims are to establish and improve healthy coping  
17 mechanisms in cancer patients and explore predictors of usage as well as analyse the  
18 usage behaviour of the Make It Training. Furthermore, we will explore relations between  
19 the observed usage behaviour and other study outcomes.  
20  
21  
22  
23  
24  
25

## 26 **Methods**

27 This study protocol (Version 1.0; August 31st, 2021) is reported according to the SPIRIT  
28 checklist (see supplementary material I).[31] In case of important protocol modification  
29 will be reported to the sponsor (Federal Ministry of Education and Research), the ethics  
30 committees of the participating centres, and the trial registration will be updated.  
31  
32  
33

### 34 *Study design*

35 The study comprises a multicentre, prospective, randomized controlled confirmatory  
36 interventional trial with two parallel arms. The proposed trial incorporates four distinct  
37 measurement time points (see Table 1 and Figure 1): the baseline assessment (T0) before  
38 randomization, a post-treatment assessment (T1), and three- and six-month follow-up  
39 assessments (T2 & T3). Additionally, continuous assessments are planned during the  
40 experimental intervention (in-treatment assessment; usage behaviour, distress,  
41 depression and anxiety symptoms, mindfulness, and self-efficacy). For the control group,  
42 data assessment during the control intervention (in-treatment assessments) is limited to  
43 measurement of distress, depression, and anxiety symptoms. The medical data (e.g.  
44 tumour entity, cancer treatment, tumour status, mental health diagnosis, previous mental  
45 health treatment, psychiatric medication; see supplementary material II for the complete  
46 case report forms) are taken from the patient's medical records at T0. Changes in the  
47 medical conditions of the patients will be continually assessed. Participants who drop out  
48 (no login for six weeks is considered as a dropout) will be contacted (if written permission  
49 for this purpose has been given before trial start) and asked to complete a dropout  
50 assessment. Before participation, written informed consent must be given (see  
51  
52  
53  
54  
55  
56  
57  
58  
59  
60



1  
2  
3 supplementary material III for model informed consent form). Table 1 displays the  
4 instruments used at each time point.  
5  
6  
7  
8  
9  
10  
11

12 ----- Please, insert Figure 1 here -----  
13  
14  
15  
16  
17  
18  
19  
20

### 21 *Participant eligibility and recruitment*

22 We set the key inclusion and exclusion criteria in line with comparable and recent studies  
23 in psycho-oncology.[10, 11, 32] Participants will be included if they have a confirmed  
24 diagnosis of cancer in the past 12 months (initial diagnosis or recurrence), are engaged in  
25 a curative treatment setting, have an age of 18-65 years, high perceived distress (HADS  
26  $\geq 13$ ) for at least one week, and have given their informed consent.  
27  
28

29 Patients with severe cognitive impairment and/or communication difficulties that  
30 compromise participation in the intervention, acute risk for suicide and/or severe  
31 depression according to clinical practice guidelines, other psychiatric or medical conditions  
32 requiring alternative treatment, known cerebral metastases, an age of  $> 65$ , no private  
33 internet access, and/or regularly contacting a mental health specialist will be excluded. We  
34 defined age of more than 65 years as an exclusion criterion because a German survey  
35 analyzing the internet literacy of cancer patients determined that while no significant  
36 differences regarding gender or age were seen, most of the cancer patients were younger  
37 than 70 years old. [33] In addition, representative data on the daily Internet use of the  
38 German population shows that Internet use decreases with age.[34]  
39  
40  
41  
42  
43  
44  
45  
46

47 The seven academic centers, which are involved in the recruitment, are: University Hospital  
48 Essen, University Hospital Tübingen, University Hospital Erlangen, Freiburg University  
49 Hospital, University Medical Center Leipzig, University Medical Center of the Johannes  
50 Gutenberg – University Mainz, Klinikum rechts der Isar of the Technical University of  
51 Munich. Participants are going to be recruited by study personnel and involved clinic  
52 personnel. Flyers and posters will be spread. In addition, information about the study and  
53 the involved staff will be presented online via social media and the study homepage  
54 (reduct-studie.de). Interested patients are able to ask questions regarding the study, e.g.  
55 its design and inclusion/exclusion criteria via E-Mail, phone or in persona.  
56  
57  
58  
59  
60



### Intervention

Eligible patients will be randomly assigned to either the experimental intervention or the control condition TAU-O. Both interventions last four months.

*Experimental intervention: Make It Training.* The psycho-oncological Make It Training is a self-guided and patient-oriented e-mental health intervention for cancer patients to overcome distress and improve their well-being. In a previously published paper, the previous version of the intervention is described.[35] The Make It Training is based on the established, effective psychotherapeutic intervention techniques of MBSR, CBT, and ACT approaches used during the treatment of cancer patients. It aims to improve emotion management, mental strength, psychological resources, distress management, and self-efficacy. The Make It Training is designed to accompany patients with cancer on their way for four months. The Make It Training consists of 16 modules. Each week, the patients are provided with a new module to help them to deal with the strains of the disease. Every module lasts approximately 30 minutes. The 16 interactive modules (eight mandatory modules, eight optional modules, see Table 2) involve various media, including tutorial videos, audio-guided mindfulness exercises, an individual skills box, and an interactive skills training. At the beginning of each module, the patient is encouraged to focus on individually relevant issues, as each module starts with a short self-evaluation of their current distress level, skills, and mindfulness. Furthermore, at the end of each module, patients receive an individual summary of the finished module with individual results, a mindfulness exercise plan, and motivational notifications. During each module, patients collect helpful skills and exercises in their individual skills boxes. The intervention also involves homework assignments and MBSR exercises that should be integrated into the cancer patients' daily routines. Downloaded material can be used offline. Each Make It module is conceptualized to be completed within one week; after one week, the next module is delivered and trained. When a new module is available, patients receive a motivational notification via email. The training can be conducted on the patients' private PC, tablet, or smartphone. See supplementary material IV for screenshots of the web-based intervention.

**Table 2: Overview of the 16 interventional modules**

| Module                                     | Topic/Skills                                                                                    | Mindfulness Practice                            |
|--------------------------------------------|-------------------------------------------------------------------------------------------------|-------------------------------------------------|
| 1. Technical Introduction <sup>2</sup>     | Quick introduction to the app and how to handle it                                              |                                                 |
| 2. <b>Welcome to your Path<sup>1</sup></b> | <b>Introduction to the structure of the Make It Training and to Mindfulness</b>                 | <b>Mindful Breathing – Observing the Breath</b> |
| 3. Health-related Behavior <sup>2</sup>    | Different aspects of promoting physical and mental health during cancer illness (diet, creating | Mindful Smelling                                |

|     |                                      |                                                                                                                                                                      |                                                      |
|-----|--------------------------------------|----------------------------------------------------------------------------------------------------------------------------------------------------------------------|------------------------------------------------------|
|     |                                      | a daily structure, dealing with online health information).                                                                                                          |                                                      |
| 4.  | Emotions <sup>1</sup>                | <b>Accepting and dealing with emotions such as anxiety, depression, or anger as a part of processing the cancer illness.</b>                                         | <b>Mindful Experiencing</b>                          |
| 5.  | Fear <sup>2</sup>                    | Dealing with cancer-related fears including fear of progression.                                                                                                     | Thoughts to Feathers                                 |
| 6.  | Pain <sup>1</sup>                    | <b>Understanding and dealing with cancer illness- and treatment-related pain.</b>                                                                                    | <b>Body Scan I – Mindful Body Experience</b>         |
| 7.  | Sleep <sup>2</sup>                   | Foundations of restful sleep: Strategies and the role of thoughts and emotions with a cancer illness                                                                 | Mindfully Letting Go                                 |
| 8.  | Activating Resources <sup>1</sup>    | <b>Discovering and consciously using personal resources of strength during cancer disease.</b>                                                                       | <b>Mindful Listening</b>                             |
| 9.  | Positivity <sup>2</sup>              | Making room for positive experiences; noticing accomplishments and step-by-step planning.                                                                            | Mindful Moment                                       |
| 10. | Body Awareness <sup>1</sup>          | <b>Dealing with cancer-related bodily changes by activating self-compassion and self-confidence.</b>                                                                 | <b>Body Scan II – Mindful Body Awareness</b>         |
| 11. | Exercise and Relaxation <sup>2</sup> | Finding a healthy balance between exercise and relaxation as a part of recovery during a cancer disease.                                                             | Mindful Breathing II – Triangle Breath               |
| 12. | Stress Management <sup>1</sup>       | <b>Mastering stressful cancer-related situations based on affirmative thoughts: The significance of thoughts for subjective experience and feelings of distress.</b> | <b>Mindful Vision</b>                                |
| 13. | Creativity <sup>2</sup>              | Exploring creativity as a resource of strength during cancer illness.                                                                                                | Mindful Doodling                                     |
| 14. | Self-care <sup>1</sup>               | <b>Self-appreciation and self-care and its importance in the context of cancer; strengthening the pillars of self-esteem.</b>                                        | <b>Mindful Self-Compassion</b>                       |
| 15. | Relationships <sup>2</sup>           | Personal relationships as a resource and communicating health information and needs toward family and friends during cancer illness.                                 | Loving-Kindness                                      |
| 16. | Looking back <sup>1</sup>            | <b>Review of Make It Training and helpful skills and using them beyond the training (Skillsbox).</b>                                                                 | <b>Favorite Mindfulness Practice OR Mindful Walk</b> |

Note. [1] Mandatory Module, [2] Additional Module

*Control intervention: Treatment as Usual optimized.* In the proposed RCT, the intervention group will be compared with an active control group as a placebo or null intervention control group would be ethically inappropriate. This refers to (i) standard treatments in the German healthcare system the patient can receive, (ii) the support to access those treatments. Patients receive all the information that is routinely provided as part of inpatient or outpatient treatment (e.g. how to find psychotherapy) In addition, the study team will help identify appropriate treatment options, if desired. (iii) TAU-O also included an active contingent, which will function as the 'optimized' part of the control intervention,

1  
2  
3 explained in the rest of this paragraph. Patients in the control group have access to selected  
4 sets of offered web-based information. These information sets will be based on CBT and  
5 contain written psychoeducational information. The topics of these information sets are  
6 equivalent to the topics of the mandatory sessions of the intervention group (see Table 2).  
7  
8 In total, the control group will receive access to eight modules over the course of four  
9 months. Every two weeks, a new set of non-interactive written information will briefly  
10 inform patients about the benefits of these skills during the course of the disease and  
11 motivate them to use these skills. No exercises, interactive worksheets, videos, audio  
12 material, and mindfulness exercises are given in the control condition, apart from the short  
13 psychoeducational information. The first information set contains an introduction to the  
14 treatment and support for finding access to selected treatments in Germany. We provided  
15 this structured information to make sure, every patient is informed about the various  
16 treatment offers of the German healthcare system. The topics of the other modules are  
17 emotions, pain, resources, body awareness, stress management, and self-care. The last  
18 module is a retrospect of all the information sets offered and a reminder for applying the  
19 learned aspects in daily lives. Before starting a module, patients in the control group are  
20 presented with some short questions about their current distress level, mindfulness, and  
21 self-efficacy. All modules are designed to encourage patients to acquire further information  
22 on the relevant topics and to implement what they have learned in their daily lives. .In all  
23 modules, it is recorded at the end whether the patient is currently receiving  
24 psychotherapeutic treatment.  
25  
26  
27  
28  
29  
30  
31  
32  
33  
34  
35

### 36 *Reminders*

37  
38 To ensure intervention adherence and fidelity, all participants will receive notifications that  
39 inform them when a new module is available. Therefore, patients in the experimental  
40 intervention group will receive one notification every week about the new available module.  
41 Patients in the control group will receive a reminder every second week about the new  
42 available module. Patients in the experimental group and the control group receive  
43 additional reminders after two and four weeks of inactivity in order to enhance motivation  
44 to log in. All notifications and reminders are standardized and sent via e-mail.  
45  
46  
47  
48  
49

50 We do not expect serious or adverse events (see *Ethical aspects*). In case of unexpected  
51 serious adverse events (e.g., risk for suicide, severe depressive symptomatology) all  
52 participants can consult an expert of the study team at their centre to receive appropriate  
53 support. The experimental intervention and control intervention is considered complete  
54 when at least five of eight mandatory modules have been completed.  
55  
56  
57  
58  
59  
60

### Outcomes

The primary outcome is distress at the end of the treatment (T1; see Table 1). To measure distress, we will use the total score of the Hospital Anxiety and Depression Scale (HADS).[36] The HADS was developed to assess possible distress in somatically-ill patients. It is a valid and objective self-rating patient-reported outcome measure and is a common instrument in psycho-oncological trials. It consists of two subscales, assessing symptoms of anxiety and depression, with each subscale comprising seven 4-point scale items. A validated German version is available and it is implemented in routine psycho-oncological care as well as in psycho-oncological research.[37]

Large RCTs investigating the efficacy and effectiveness of psycho-oncological treatments have used distress as a primary or secondary outcome.[10, 11, 22, 38] Treatment guidelines for psycho-oncological treatment emphasize the importance of targeting and reducing distress in cancer patients (e.g., [39]).

Secondary endpoints for this study include (a) self-efficacy, (b) quality of life, (c) mindfulness, (d) distress over four assessment points, (e) distress and its longitudinal course, (f) depression and anxiety symptoms, (g) client satisfaction, (h) time to dropout, (i) cost-effectiveness, (j) predictors of usage, (k) coping skills, and (l) distress, mindfulness, and self-efficacy. These outcomes have been chosen based on recommendations by current treatment guidelines (German Clinical Practice Guideline) or on their establishment in previous psycho-oncological and e-mental health trials.[10, 11, 38, 40] We will use validated instruments, self-generated items as well as usage data.

(a) Self-efficacy: For the assessment of self-efficacy, we will use the German version of the General Self-Efficacy Scale (GSES).[41] The GSES is a self-report measure of self-efficacy and optimistic self-beliefs related to coping with a variety of difficult demands in life as well as coping with all kinds of stressful life events. Responses are rated on a 4-point Likert scale for all ten items. It is available in 33 languages, and it is objective and validated in the German language.

(b) Quality of life: We will apply two questionnaires to measure quality of life in the proposed trial. First, the widely used European Quality of Life 5 Dimensions 5 Level questionnaire (EQ-5D-5L) [42] will be used as a generic quality of life questionnaire and as the basis for cost-effectiveness analyses (see below). The EQ-5D-5L consists of five health-related dimensions, which can be scored on five levels. Additionally, the questionnaire includes one visual analogue scale to assess general health status. We will also use the European Organization for Research and Treatment of Cancer - Quality of Life Questionnaire (EORTC-QLQ-C30),[43] which was developed to assess the quality of life of cancer patients. It is composed of 30 items and incorporates nine multi-item scales: five functional scales (physical, role, cognitive, emotional, and social); three symptom scales (fatigue, pain, nausea, and vomiting); and one global health and quality of life scale. Several single-item symptom measures are also included. Responses are given on a 4-

1  
2  
3 point Likert scale except for the items that evaluate the overall quality of life (items 29 and  
4 30), which are given on a 7-point Likert scale. We will use the validated and reliable  
5 German version.

6  
7 (c) Mindfulness: To assess mindfulness, we will use the validated German version of the  
8 Freiburg Mindfulness Inventory (FMI).[44] It consists of 14 items, and all responses are  
9 given on a 4-point Likert scale.

10  
11 (d) Distress over four assessment points: Distress assessed with the HADS will be modelled  
12 over the whole treatment period of each patient, with measurements taken at T0 (baseline  
13 assessment), T1 (post-treatment assessment), T2 (3 months follow-up assessment), and  
14 T3 (6 months follow-up assessment (see also Table 1). This will provide insights into  
15 changes of distress depending on various starting points of distress.

16  
17 (e) Distress: Distress and its longitudinal course measured via the Distress Thermometer  
18 (DT) [45] will be analysed over the whole trial of each patient, with measurements taken  
19 at T0 (baseline assessment), T1 (post-treatment assessment), T2 (3 months follow-up  
20 assessment), and T3 (6 months follow-up assessment). Furthermore, the DT will be applied  
21 twice in each module of the experimental and control intervention. DT is an efficient and  
22 convenient validated measurement of assessing distress. It is an established and rapid  
23 screening instrument for distress, which is presented as a visual thermometer using a scale  
24 from 0 (no distress) to 10 (extreme distress).

25  
26 (f) Depression and anxiety symptoms: We will use the Patient Health Questionnaire-4 (PHQ-  
27 4) [46] in its validated German version to measure depression and anxiety symptoms. The  
28 PHQ-4 is an established short questionnaire, which consists of four items: two items on  
29 depression (PHQ-2) and two items on generalized anxiety (Generalized Anxiety Disorder  
30 Scale-2, GAD-2). Answers are rated on a 4-point Likert scale for all four items. The PHQ-4  
31 will be applied over the whole trial of each patient with measurements taken at T0, T1, T2,  
32 and T3 (see also Table 1). During the experimental intervention, it will be applied in each  
33 module in order to track changes in the level of depression and anxiety during the course  
34 of the intervention. The PHQ-4 will be used during the control intervention as well.

35  
36 (g) Client satisfaction and usability: The Client Satisfaction Questionnaire adapted to  
37 Internet-based interventions [CSQ-I] [47] is an adapted German version of an eight-item  
38 client satisfaction questionnaire [ZUF-8] [48] used to assess the global satisfaction of  
39 participants with the internet-based intervention. Responses are given on a 4-point Likert  
40 scale for all items. Additionally, the German version of the System Usability Scale [SUS]  
41 [49] is used to assess the usability of the Make It Training. This questionnaire comprises  
42 10 items, which are to be rated on a 5-point Likert scale. Furthermore, self-generated  
43 items to evaluate specific aspects (e.g., content, videos) will be used. On top of that, we  
44 will use a healthcare smartphone app evaluation survey to determine if our tool is reliable  
45 and useful.[50]

(h) Time to dropout and usage behaviour will be defined based on the number and type of modules completed, time per day, type and number of modules started, time since last login, frequency of login, frequency of each module, time for each module, % of each module completed, type and number of videos and audios started, and type and number of videos and audios finished. Patients who do not log in for six weeks are considered as dropouts.

(i) Cost-effectiveness: The aim of the economic evaluation is to analyse the cost-effectiveness of the Make It Training by performing a cost-effectiveness- and a cost-utility-analysis from a payers' perspective. For the cost-utility analysis, quality-adjusted life years (QALYs) calculated based on utilities derived from the EQ-5D-5L questionnaire will be used as an effect measure. Resource use will be ascertained by questionnaire and will be evaluated in monetary units according to standards of health economics.

(j) Predictors of usage: It is very important to assess predictors of actual usage behaviour because interventions can only be beneficial to those patients using the intervention. Therefore, the predictors of actual usage behaviour/ uptake of the Make It Training will be evaluated. To this end, a modified version of the model based on the Unified Theory of Acceptance and Use of Technology (UTAUT) will be established.[51] Furthermore, internet-related variables will be established.

(k) Coping skills: Self-generated items to assess changes in coping skills will be used.

(l) Distress, mindfulness, and self-efficacy will be assessed by single items before the start of each module in both groups. This way, it will be possible to assess the change in these outcomes throughout the intervention.

**Table 1: Overview of the assessment schedule**

| Measures                         | Planned assessment time points |                     |                                          |                                           |                                            | Drop-out |
|----------------------------------|--------------------------------|---------------------|------------------------------------------|-------------------------------------------|--------------------------------------------|----------|
|                                  | Baseline<br>(T0 -<br>month 0)  | During<br>treatment | End of<br>treatment<br>(T1 -<br>month 4) | 3-month<br>Follow-up<br>(T2 -<br>month 7) | 6-month<br>Follow-up<br>(T3 -<br>month 10) |          |
| <b><u>Primary outcome</u></b>    |                                |                     |                                          |                                           |                                            |          |
| <b><u>Distress</u></b>           |                                |                     |                                          |                                           |                                            |          |
| HADS                             | x                              |                     | x                                        | x                                         | x                                          | x        |
| <b><u>Secondary outcomes</u></b> |                                |                     |                                          |                                           |                                            |          |
| <b><u>Self-efficacy</u></b>      |                                |                     |                                          |                                           |                                            |          |
| GSES                             | x                              |                     | x                                        | x                                         | x                                          | x        |
| <b><u>Quality of Life</u></b>    |                                |                     |                                          |                                           |                                            |          |
| EORTC-QLQ-C30                    |                                |                     |                                          |                                           |                                            |          |
| EQ-5D-5L                         | x                              |                     | x                                        | x                                         | x                                          | x        |

|                                                                |   |   |   |   |   |   |
|----------------------------------------------------------------|---|---|---|---|---|---|
| <b>Mindfulness</b>                                             |   |   |   |   |   |   |
| FMI                                                            | X |   | X | X | X | X |
| <b>Distress</b>                                                |   |   |   |   |   |   |
| DT                                                             | X | X | X | X | X | X |
| HADS                                                           |   |   |   |   |   |   |
| <b>Depression &amp; Anxiety</b>                                |   |   |   |   |   |   |
| PHQ-4                                                          | X | X | X | X | X | X |
| <b>Internet related variables</b>                              | X |   |   |   |   |   |
| <b>Resource use</b>                                            | X |   |   | X | X |   |
| <b>Client satisfaction, usability, and predictors of usage</b> |   |   |   |   |   |   |
| CSQ-I                                                          |   |   | X |   |   | X |
| SUS                                                            |   |   | X |   |   | X |
| UTAUT                                                          | X |   |   |   |   |   |
| ETHSA                                                          |   |   | X |   |   | X |
| <b>Usage behaviour<sup>1</sup></b>                             |   | X |   |   |   |   |
| <b>Self-generated items<sup>2</sup></b>                        | X | X | X | X | X | X |
| <b>Demographic &amp; medical characteristics<sup>3</sup></b>   | X |   |   |   |   |   |

Note: HADS = Hospital Anxiety and Depression Scale; GSES = General Self-Efficacy; EORTC-QLQ-C30 = European Organization for Research and Treatment of Cancer Quality of Life Questionnaire; EQ-5D-5L = European Quality of Life 5 Dimensions 5 Level Version; FMI = Freiburg Mindfulness Inventory; DT = Distress Thermometer; PHQ-4 = Patient Health Questionnaire-4; CSQ-I = Client Satisfaction Questionnaire adapted to Internet-based interventions; SUS = System Usability Scale; UTAUT = Unified theory of acceptance and use of technology model; ETHSA = Evaluation Tool for Healthcare Smartphone Applications.

<sup>1</sup> Usage behaviour refers to both groups. For the experimental group, it implies: Time per day, type and number of modules started, type and number of modules finished, time since last log in, frequency of log in, frequency of each module, time for each module, % of each module completed, type and number of videos and audios started, and type and number of videos and audios finished. For the control group, it implies: Time per day, type and number of “modules” displayed, time since last log in, frequency of log in, frequency of each “module”, time for each “module”, whereby a “module” is defined as brief written psychoeducational information.

<sup>2</sup> Self-generated items on acceptability, satisfaction with the Make It Training, mindfulness, self-efficacy, coping, and skills as well as eHealth related variables (e.g., internet experience).

<sup>3</sup> Changes in the medical conditions and social demographic parameters of the patients will be continually assessed

*Trial procedure and timeline*

An overview of the trial flow and assessment schedule is presented in Figure 1 and Table 1, respectively. Trial duration for participants comprises 10 months (including 4 months of



1  
2  
3 intervention). Once the interested patient contacts the study staff, a screening for eligibility  
4 will be applied and the patient will receive an explanation about the study conditions, data  
5 storage and data safety (oral and written). The patient will receive an appointment for the  
6 baseline diagnostic assessment to check for eligibility, which will be handled by study team  
7 of the respective clinic. The patient will be included into the study, if inclusion criteria are  
8 met and exclusion criteria do not apply and the patient has given written informed consent.  
9 Once the patient is included into the study and the baseline assessment is completed,  
10 allocation into one of the following study groups will be applied via randomization: Make It  
11 Training (experimental group) or TAU-O (control group). The patients will be informed  
12 about their group allocation result and will receive an e-mail with the online link for the  
13 offered web-based program and a code to log in into this program and to be able to access  
14 the respective intervention (Make It Training or TAU-O).

15  
16  
17  
18  
19  
20  
21 After four months of experimental or control intervention a post-treatment diagnostic  
22 assessment and two follow-up diagnostic assessments will be implemented via a web-  
23 based survey 0, 3 and 6 months after the ending of the intervention. Patients receive  
24 reminder notifications (stepped intensity: E-mail, phone call) in case of non-completion of  
25 the assessments. In case of a dropout (no login for six weeks) during the intervention,  
26 those patients receive an E-Mail with an online link for a short questionnaire assessing  
27 reasons for their dropout.  
28  
29  
30  
31

### 32 33 *Sample size calculation*

34  
35 The sample size planning is based on the publication of van den Berg et al., 2015.[11] In  
36 this publication, a dropout rate of 25% was assumed for the planning of the study, but  
37 only a 5% dropout rate was observed at T1 (primary endpoint). In our project, we  
38 conservatively assume a dropout rate of 20%, which to us seems to be a realistic  
39 assumption for an e-mental health intervention. Furthermore, we assume an equal dropout  
40 rate in both arms of the study and zero difference (after imputation, statistical analysis)  
41 between dropouts in both arms in terms of the primary endpoint. In the end, assuming an  
42 effect size of  $d$  for compliant patients, the true effect size expected in our study would be  
43  $0.80*d$ . Drawing on the paper of van den Berg et al., 2015 we expect an effect size of 0.37  
44 for a baseline adjusted analysis, drop outs excluded (the effect size of the unadjusted  
45 analysis was recalculated from Table 2 of van den Berg et al., 2015 [11] 0.36, so there  
46 was no relevant difference between adjusted and unadjusted analysis). Due to a small  
47 effect to be expected by the active control condition, we conservatively assume an effect  
48 size of 0.30 in our study. In summary, we assume an effect size of  $0.80*0.30=0.24$ .  
49 Accordingly, a sample size of 274 patients per group would be necessary. Note that  
50 dropouts are already included in this sample due to the effect shrinkage used in sample  
51 size calculation. To adjust for centre effects and baseline ( $df=6+1$ ) we need a total of 556  
52  
53  
54  
55  
56  
57  
58  
59  
60



1  
2  
3 recruited patients (n=278 per study arm). Therefore, the goal of the study is to allocate  
4 600 patients and include 556 into the ITT analysis.  
5  
6  
7

#### 8 *Randomization and blinding*

9 Randomization will be applied via @secuTrial (www.secutrial.com) using a standard  
10 computer algorithm. @secuTrial will be provided by the Institute of Clinical Epidemiology  
11 and Applied Biostatistics (IKEaB), Medical Faculty Tübingen, Eberhard Karls University  
12 Tübingen. Stratification for study centres will be applied. The remaining prognostic factors  
13 are assumed to be balanced as a result of the randomization process. The randomization  
14 of participants and data monitoring will be ensured by the participating study centres.  
15 Blinding for both patients and therapists will be impossible in the trial, although assessors  
16 and statisticians (primary analysis) will be blinded to group allocation to ensure objective  
17 analyses and audits.  
18  
19  
20  
21  
22  
23

#### 24 *Data management, data storage, and dissemination policy*

25 To protect confidentiality, the participant's data will be pseudonymized and stored for at  
26 least ten years. Independent data management is ensured by the IKEaB. In line with the  
27 EU General Data Protection Regulations, we will use the established and structured  
28 procedures implemented at Tübingen University Hospitals (databases: @secuTrial). After  
29 the data-management plan (including digital data storing, archiving and regular plausibility  
30 checks) of the IKEaB, all standard operating procedures (SOPs) will be compliant with legal  
31 requirements. The data are entered electronically either by the study team or by the  
32 patients themselves. Paper-based source data will be entered to the electronic database.  
33 The conformity with the source data is monitored.  
34  
35  
36  
37  
38

39 As per the guidelines of Good Clinical Practice (§13), all important trial data (including  
40 signed informed consents, patient identification lists, and original records of clinical  
41 findings) will be archived for 10 years after completion or termination of the trial. Patient  
42 documents will be stored in accordance with the time permitted by the hospitals (at least  
43 10 years). Data in terms of usage behaviour will be stored anonymously on a server, placed  
44 in the Clinic for Psychosomatic Medicine and Psychotherapy, LVR Hospital Essen. As per  
45 the guidelines of Good Clinical Practice (§13), usage behaviour data will be stored 10 years  
46 after completion or termination of the trial. Only authorized staff (project team) have  
47 access to the ICH/GCP-compliant validated system (@secuTrial).  
48  
49  
50  
51  
52

53 Data storage and sharing will be following Good Clinical Practice guidelines, Deutsche  
54 Forschungsgemeinschaft (DFG) guidelines, and the statements concerning data sharing in  
55 The New England Journal of Medicine.[52, 53] Data collected from the trial will be  
56 anonymously available in data repositories after the major results are published. The  
57 statistical analysis plan and all relevant documents will be stored and made available by  
58 request. Access to data storage will be restricted to authorized personnel. Patient consent  
59  
60

1  
2  
3 forms will contain a section concerning the aforementioned aspects of data storage and  
4 data sharing.  
5

6 We will set up a project homepage that will update the interested public on the progression  
7 of the trial, participation opportunities (e.g., workshops, conferences), and major results.  
8 The website will remain live beyond the core funding period, acting as a central access  
9 point for future research work and outputs and as an avenue to a longer dissemination  
10 legacy. The main results of the trial will be submitted for publication in an open-access  
11 peer-reviewed journal and will be made publicly available in the clinical trial registry. In  
12 addition to presenting the results at national and international conferences, we will  
13 regularly communicate scientific results in lay language via press releases, social media,  
14 and forums that are popular among patients. We will especially collaborate with our patient  
15 council and patient organizations in planning and implementing targeted and patient-  
16 oriented information campaigns to explain and disseminate the results to cancer-affected  
17 persons and the public. For further dissemination and in-depth discussion of the results,  
18 we will involve the Comprehensive Cancer Center (CCC) network in Germany, and we will  
19 specifically rely on their expertise in promoting public awareness for psycho-oncological  
20 research.  
21  
22  
23  
24  
25  
26  
27  
28  
29

### 30 *Monitoring*

31 Monitoring will be provided by the Centre of Clinical Trials (ZKS), an independent clinical  
32 research unit of the University Hospital Tübingen, which is independent of clinics  
33 performing the study. The ZKS is responsible for the methodological quality of the proposed  
34 trial. The ZKS has set the highest-quality criteria according to the legal requirements for  
35 medicines and medical devices as well as according to the Good Clinical Practice guidelines.  
36 The ZKS quality management system is certified under DIN EN ISO 9001:2015. All  
37 activities connected with the proposed trial will be conducted in accordance with the SOPs  
38 of the ZKS. The monitoring plan includes a pre-trial visit, intermediate monitoring and a  
39 close-out visit in each recruiting centre. The data-monitoring plan includes the validation  
40 of written informed consent forms, documentation of (severe) adverse events, data validity  
41 of outcome measures with particular focus on source data transfer, validation of inclusion  
42 and exclusion criteria, and documentation of the ending of treatment and dropouts.  
43  
44  
45  
46  
47  
48  
49  
50

### 51 *Statistical methods*

52 The primary aim of this trial is to demonstrate the superiority of the e-mental health  
53 intervention Make It Training in comparison to TAU-O in terms of distress in cancer  
54 patients. The primary endpoint, distress, will be analysed using a baseline (T0 assessment)  
55 -adjusted ANCOVA for distress measurement once the intervention (T1) has been  
56 completed, with study arm as binary factor, baseline as continuous measurement, and  
57 study centre as an additional categorical covariate. The primary analysis will be in the  
58  
59  
60

1  
2  
3 intention-to-treat population, with imputation of missing data in the case of dropouts.  
4 Intention to treat will be defined as all patients for whom the HADS scale is available at  
5 baseline. Additionally, it is expected that patient age and gender will be documented, and  
6 these variables will be used to impute missing values. Imputation will be computed using  
7 the SPSS module for multiple imputations with "monotone missing pattern" (as we will use  
8 complete data for gender, age, and baseline). The number of imputations will be 3000,  
9 and the seed will be set to the date of analysis (ddmmyy). Furthermore, it is expected that  
10 endpoint measurements might be obtained from at least a subsample of dropouts, which  
11 might improve the accuracy of imputation procedures. An interim analysis is not planned.  
12 Secondary analyses include mixed models for overall change in distress; self-efficacy;  
13 mindfulness; coping; depression and anxiety; and quality of life including physical  
14 condition, tumour entity, and treatment method; the analyses will use T0 as covariate and  
15 T1, T2, and T3 as dependent observations with a predefined analysis: interaction of group  
16 with contrasts estimation of adjusted mean and 95% CI. Furthermore, secondary endpoints  
17 will be analysed using a chi-square test and logistic regression for binary outcomes, t-  
18 tests, and linear models for continuous outcomes. Time to dropout will be analysed as a  
19 secondary endpoint itself, using the Kaplan-Meier estimate and the Cox proportional hazard  
20 regression. Separate tabulations and line listings of adverse events and severe adverse  
21 events will be ensured to analyse safety. Ratio of changes in resource use and of changes  
22 in primary endpoint and in quality of life will generate point estimates for the incremental  
23 cost-effectiveness ratio; to determine deterministic and probabilistic sensitivity a  
24 respective analysis will be performed.

### 37 38 *Ethical aspects*

39 From our view, the trial poses no ethical concerns. We are unaware of specific risks or  
40 disadvantages that might affect patients during the trial, and we expect no specific adverse  
41 or serious adverse events. In case of unexpected adverse or serious adverse events they  
42 will be documented and reported by the responsible monitoring unit. During the trial,  
43 patients will have access to telephone/video consultation or face-to-face contact with a  
44 member of the study team (psychologist or physician) if indicated as needed.

45 We evaluated the risk of the proposed trial based on published literature in similar trials  
46 conducted before.[10, 11, 54, 55]. Make It Training as well as TAU-O involves the chance  
47 of improvement of distress in cancer patients. Side effects of evidence-based  
48 psychotherapies are fortunately rather rare. Possible undesired effects may include  
49 transient worsening of symptoms.

50 The Ethics Committee of the University Hospitals Essen have approved the study (21-  
51 10076-BO). Written informed consent is mandatory for all patients to participate and will  
52 be obtained after providing oral and written information and prior to randomization. All  
53 participating patients can withdraw at any time without any disadvantage. The trial will be

1  
2  
3 conducted in accordance with the tenets of the Declaration of Helsinki and the guidelines  
4 of Good Clinical Practice. Recruitment in the study centres will not begin until the study  
5 protocol has been approved and the relevant ethics committee has given its approval. A  
6 Data Safety and Monitoring Board (DSMB) has been implemented. The DSMB will supervise  
7 and monitor the proposed trial and is obliged to take appropriate actions where needed.  
8 The DSMB evaluates conformity of the trial with the study protocol as well as compliance  
9 with ethical criteria. The DSMB will decide whether practice is meeting the ethical criteria  
10 determined for this trial and/or whether the trial should be stopped. Adverse events and  
11 dropouts throughout the trial will be assessed and documented by the study team. The  
12 study team will be required to inform the DSMB if any adverse events or dropouts occur.  
13 Major events that need to be monitored include acute suicidality, suicidal acts, and clinically  
14 relevant increased symptomatology. Checks for causes of adverse events will be applied  
15 at each participating study centre.  
16  
17  
18  
19  
20  
21  
22  
23

#### 24 *Patient and public involvement*

25 Patients were involved in developing the Make It Training (the content of the modules,  
26 recommendations for enhancing usability) and in planning the proposed trial. We have  
27 established a patient council (consisting of five members) and involved the self-help  
28 organization Haus der Krebs-Selbsthilfe - Bundesverband e.V. to support the project team.  
29 Haus der Krebs-Selbsthilfe - Bundesverband e.V. is an established umbrella organization  
30 of many different cancer self-help organizations in Germany and is primarily funded by the  
31 non-profit organization German Cancer Aid Foundation. The patient council was consulted  
32 regarding research design, patient-friendly summaries, and consent forms, as well as  
33 regarding dissemination of results among patients and in academic publications. A  
34 participatory decision-making process between the patient council and the researchers was  
35 implemented and followed. The final case report forms were tested regarding  
36 comprehensibility, illustration, and duration of processing by the members of the patient  
37 council. During regular exchanges with the patient council, we will also mobilize different  
38 social media and self-help cancer groups to disseminate the trial's results. Patient  
39 involvement will be informed by the online resources of UK National Health Services  
40 (INVOLVE; <http://www.invo.org.uk/>). The public in the form of the Federal Ministry of  
41 Education and Research is the sponsor of this trial.  
42  
43  
44  
45  
46  
47  
48  
49  
50  
51  
52

#### 53 **Discussion**

54 In our prospective, multicentre, randomized controlled confirmatory intervention trial  
55 (Reduct), we aim to assess the efficacy and cost-effectiveness of the e-mental health  
56 intervention Make It Training. The aim is to offer an evidence-based, efficient, cost-  
57 effective web-based psycho-oncological intervention in routine-care for individuals with  
58 cancer to reduce distress and enhance well-being.  
59  
60

1  
2  
3 The provision of care via e-mental health approaches aims to keep costs low for treating  
4 staff and premises, to offer care to many people at the same time, to promote continuity  
5 of care by being independent of time and place and to overcome the insufficient availability  
6 of specialized treatments by improving outreach. Thus, the training has socio- and health-  
7 economic benefits. By evaluating the efficacy of the Make It Training, important findings  
8 for e-mental health interventions in general and in the context of somatic diseases could  
9 be derived. Accordingly, other patient groups could benefit from similar e-mental health  
10 approaches as well.

11  
12 Treatment guidelines for psycho-oncology emphasize the importance of targeting and  
13 reducing distress in cancer patients.[39] The initial results of e-mental health interventions  
14 have been promising for cancer patients.[10, 11, 56] Accordingly, RCTs are needed to  
15 evaluate e-mental health interventions in psycho-oncological care – especially self-guided  
16 interventions, with low cost-intensity and with outreach to outlying regions with limited  
17 psycho-oncological offers.[11, 56-58] Given the increasing impact of digital technologies  
18 in daily life, the web-based Make It Training has the potential to reach high numbers of  
19 patients and to overcome barriers that patients face in analogue face-to-face care (e.g.,  
20 physical and psychological constraints due to cancer symptoms or treatments, limited  
21 psycho-oncological resources) [59]. Because it is accessible everywhere at any time, the  
22 Make It Training enables cancer patients to participate in psycho-oncological interventions  
23 regardless of barriers in the current health care system.[60] Younger cancer patients  
24 generally report more unmet needs and utilize less likely psycho-oncological services;[61]  
25 the e-mental health intervention meets their demands and requirements.

26  
27 In conclusion, we expect the results to contribute to the knowledge on e-mental health  
28 interventions in general and especially for cancer patients and to overcome barriers or  
29 obstacles in everyday healthcare in order to offer significant benefits for both patient and  
30 provider.

### 31 32 **List of Abbreviations**

33 CBT = cognitive behavioural therapy

34 MBSR = mindfulness-based stress reduction

35 ACT = acceptance and commitment therapy

36 iMBCT = Internet mindfulness-based cognitive therapy

37 TAU-O = treatment as usual optimized

38 RCT(s) = randomized controlled trial(s)

39 SOPs = standard operating procedures

40 IKEaB = Institute of Clinical Epidemiology and Applied Biostatistics

41 ZKS = Centre of Clinical Trials

**Authors' contributions:** Funding for this trial was obtained by MT (PI), AB (trial coordinator), JG (Co-PI), and YE (Co-PI). PM provided statistical and methodical expertise in trial design and is the principal trial statistician. PM is responsible for data management during the trial. CS, JH, JK, MD, AD, AM-T, DS, JS, MT, JW, AW, and SZ are trial site investigators who contributed to refinement of the study design and protocol, implementation of the trial and who are involved regarding patient recruitment, treatment, and data collection. JG, AB, CS, JK, and JH developed and further adapted the intervention and prepared the content for eHealth adaption. SD is responsible for the intervention's IT infrastructure and provided important feedback on eHealth-related issues. SZ is senior consultant within in the trial. AN provided health economic expertise in the trial design and is responsible for the health economic evaluations. WB is head of the Centre of Clinical Trials (ZKS), which is responsible for quality assurance, monitoring, and adherence to the study protocol. All authors contributed to refinement of the study protocol. AB drafted the manuscript and all co-authors critically reviewed it and approved the final version of the manuscript.

**Funding statement:** This research received financial sponsoring from the Federal Ministry of Education and Research (01KG2021). The funding source has no role in the design of this study and will not have any role during its execution, analyses, interpretation of the data, or decision to submit results.

**Competing interest statement:** The authors declare that they have no financial or competing interest.

## References

1. Sung H, Ferlay J, Siegel RL, et al. Global Cancer Statistics 2020: GLOBOCAN Estimates of Incidence and Mortality Worldwide for 36 Cancers in 185 Countries. *CA Cancer J Clin.* 2021;71(3):209-49.
2. Murray CJL, Vos T, Lozano R, et al. Disability-adjusted life years (DALYs) for 291 diseases and injuries in 21 regions, 1990–2010: a systematic analysis for the Global Burden of Disease Study 2010. *The Lancet.* 2012;380(9859):2197-223.
3. Mehnert A, Hartung TJ, Friedrich M, et al. One in two cancer patients is significantly distressed: Prevalence and indicators of distress. *Psychooncology.* 2018;27(1):75-82.
4. Mehnert A, Brahler E, Faller H, et al. Four-week prevalence of mental disorders in patients with cancer across major tumor entities. *J Clin Oncol.* 2014;32(31):3540-6.
5. Mitchell AJ, Chan M, Bhatti H, et al. Prevalence of depression, anxiety, and adjustment disorder in oncological, haematological, and palliative-care settings: A metaanalysis of 94 interview-based studies. *Lancet Oncol.* 2011;12(2):160-174.
6. Singer S, Das-Munshi J, Brahler E. Prevalence of mental health conditions in cancer patients in acute care--a meta-analysis. *Ann Oncol.* 2010;21(5):925-30.
7. Buttner M, Konig HH, Lobner M, et al. Out-of-pocket-payments and the financial burden of 502 cancer patients of working age in Germany: results from a longitudinal study. *Support Care Cancer.* 2019;27(6):2221-8.
8. Zaorsky NG, Zhang Y, Tuanquin L, et al. Suicide among cancer patients. *Nat Commun.* 2019;10(1):207.



9. Park CL, Gaffey AE. Relationships between psychosocial factors and health behavior change in cancer survivors: an integrative review. *Ann Behav Med*. 2007;34(2):115-34.
10. Urech C, Grossert A, Alder J, et al. Web-Based Stress Management for Newly Diagnosed Patients With Cancer (STREAM): A Randomized, Wait-List Controlled Intervention Study. *J Clin Oncol*. 2018;36(8):780-8.
11. van den Berg SW, Gielissen MF, Custers JA, et al. BREATH: Web-Based Self-Management for Psychological Adjustment After Primary Breast Cancer--Results of a Multicenter Randomized Controlled Trial. *J Clin Oncol*. 2015;33(25):2763-71.
12. Smith SK, MacDermott K, Amarasekara S, et al. Reimagine: a randomized controlled trial of an online, symptom self-management curriculum among breast cancer survivors. *Support Care Cancer*. 2019;27(5):1775-81.
13. Chambers SK, Ritterband LM, Thorndike F, et al. Web-Delivered Cognitive Behavioral Therapy for Distressed Cancer Patients: Randomized Controlled Trial. *J Med Internet Res*. 2018;20(1):e42.
14. Cheung EO, Cohn MA, Dunn LB, et al. A randomized pilot trial of a positive affect skill intervention (lessons in linking affect and coping) for women with metastatic breast cancer. *Psychooncology*. 2017;26(12):2101-8.
15. Beatty L, Koczwara B, Wade T. Evaluating the efficacy of a self-guided Web-based CBT intervention for reducing cancer-distress: a randomised controlled trial. *Support Care Cancer*. 2016;24(3):1043-51.
16. Dowd H, Hogan MJ, McGuire BE, et al. Comparison of an Online Mindfulness-based Cognitive Therapy Intervention With Online Pain Management Psychoeducation: A Randomized Controlled Study. *Clin J Pain*. 2015;31(6):517-27.
17. Wootten AC, Abbott JA, Meyer D, et al. Preliminary results of a randomised controlled trial of an online psychological intervention to reduce distress in men treated for localised prostate cancer. *Eur Urol*. 2015;68(3):471-9.
18. Cillessen L, Schellekens MPJ, Van de Ven MOM, et al. Consolidation and prediction of long-term treatment effect of group and online mindfulness-based cognitive therapy for distressed cancer patients. *Acta Oncol*. 2018;57(10):1293-302.
19. Ham K, Chin S, Suh YJ, et al. Preliminary Results From a Randomized Controlled Study for an App-Based Cognitive Behavioral Therapy Program for Depression and Anxiety in Cancer Patients. *Front Psychol*. 2019;10:1592.
20. Russell L, Ugalde A, Orellana L, et al. A pilot randomised controlled trial of an online mindfulness-based program for people diagnosed with melanoma. *Support Care Cancer*. 2019;27(7):2735-46.
21. Jim HSL, Hyland KA, Nelson AM, et al. Internet-assisted cognitive behavioral intervention for targeted therapy-related fatigue in chronic myeloid leukemia: Results from a pilot randomized trial. *Cancer*. 2020;126(1):174-80.
22. Nissen ER, O'Connor M, Kaldo V, et al. Internet-delivered mindfulness-based cognitive therapy for anxiety and depression in cancer survivors: A randomized controlled trial. *Psychooncology*. 2020;29(1):68-75.
23. Matis J, Svetlak M, Slezackova A, et al. Mindfulness-Based Programs for Patients With Cancer via eHealth and Mobile Health: Systematic Review and Synthesis of Quantitative Research. *J Med Internet Res*. 2020;22(11): e20709. doi: 10.2196/20709
24. Compen F, Bisseling E, Schellekens M, et al. Face-to-Face and Internet-Based Mindfulness-Based Cognitive Therapy Compared With Treatment as Usual in Reducing Psychological Distress in Patients With Cancer: A Multicenter Randomized Controlled Trial. *J Clin Oncol*. 2018;36(23):2413-2421.
25. Triberti S, Savioni L, Sebri V, et al. eHealth for improving quality of life in breast cancer patients: A systematic review. *Cancer Treat Rev*. 2019;74:1-14.
26. McCann L, McMillan KA, Pugh G. Digital Interventions to Support Adolescents and Young Adults With Cancer: Systematic Review. *JMIR Cancer*. 2019;5(2):e12071.
27. Hulbert-Williams N.J, Beatty L, & Dhillon H.M. Psychological support for patients with cancer: evidence review and suggestions for future directions. *Current opinion in supportive and palliative care*. 2018;12(3):276-292.
28. Hayes S.C, & Hofmann S.G. The third wave of cognitive behavioral therapy and the rise of process-based care. *World psychiatry*. 2017;16(3):245-246.

- 1  
2  
3 29. Mendes-Santos C, Nunes F, Weiderpass E, et al. Development and Evaluation of  
4 the Usefulness, Usability, and Feasibility of iNOV Breast Cancer: Mixed Methods Study.  
5 JMIR cancer. 2022;8(1):e33550.
- 6 30. Kinner E.M, Armer J.S, McGregor B.A, et al. Internet-Based Group Intervention for  
7 Ovarian Cancer Survivors: Feasibility and Preliminary Results. JMIR cancer.  
8 2018;4(1):e1.
- 9 31. Chan AW, Tetzlaff JM, Altman DG, et al. SPIRIT 2013 statement: defining  
10 standard protocol items for clinical trials. Ann Intern Med. 2013;158(3):200-7.
- 11 32. Sharpe M, Walker J, Hansen CH, et al. Integrated collaborative care for comorbid  
12 major depression in patients with cancer (SMaRT Oncology-2): a multicentre randomised  
13 controlled effectiveness trial. The Lancet. 2014;384(9948):1099-108.
- 14 33. Holmes MM. Why People Living With and Beyond Cancer Use the Internet. Integr  
15 Cancer Ther. 2019;18:1534735419829830.
- 16 34. D21-Digital-Index 2020/2021. Jährliches Lagebild zur Digitalen Gesellschaft.  
17 Initiative D21. [https://initiatived21.de/app/uploads/2021/02/d21-digital-index-](https://initiatived21.de/app/uploads/2021/02/d21-digital-index-2020_2021.pdf)  
18 [2020\\_2021.pdf](https://initiatived21.de/app/uploads/2021/02/d21-digital-index-2020_2021.pdf) Accessed: March 2022.
- 19 35. Bäuerle A, Teufel M, Schug C, et al. Web-based MINDfulness and Skills-based  
20 distress reduction in cancer (MINDS): study protocol for a multicentre observational  
21 healthcare study. BMJ Open. 2020;10(8):e036466. doi:10.1136/bmjopen-2019-036466
- 22 36. Zigmond AS, Snaith RP. The hospital anxiety and depression scale. Acta Psychiatr  
23 Scand. 1983;67(6):361-70.
- 24 37. Petermann F. Hospital Anxiety and Depression Scale, Deutsche Version (HADS-D).  
25 Zeitschrift für Psychiatrie, Psychologie und Psychotherapie. 2011;59(3):251-3.
- 26 38. Murphy MJ, Newby JM, Butow P, et al. Randomised controlled trial of internet-  
27 delivered cognitive behaviour therapy for clinical depression and/or anxiety in cancer  
28 survivors (iCanADAPT Early). Psychooncology. 2020;29(1):76-85.
- 29 39. Leitlinienprogramm Onkologie (Deutsche Krebsgesellschaft DK, AWMF).  
30 Psychoonkologische Diagnostik, Beratung und Behandlung von erwachsenen  
31 Krebspatienten 2014 [Langversion 1.1:[Available from: [http://leitlinienprogramm-](http://leitlinienprogramm-onkologie.de/Leitlinien.7.0.html)  
32 [onkologie.de/Leitlinien.7.0.html](http://leitlinienprogramm-onkologie.de/Leitlinien.7.0.html)
- 33 40. Brebach R, Sharpe L, Costa DS, et al. Psychological intervention targeting distress  
34 for cancer patients: a meta-analytic study investigating uptake and adherence.  
35 Psychooncology. 2016;25(8):882-90.
- 36 41. Schwarzer R JM. Generalized Self-Efficacy scale. Weinman J WS, Johnston M,  
37 editor. UK: NFER-NELSON Windsor; 1995.
- 38 42. Herdman M, Gudex C, Lloyd A, et al. Development and preliminary testing of the  
39 new five-level version of EQ-5D (EQ-5D-5L). Qual Life Res. 2011;20(10):1727-36.
- 40 43. Aaronson NK, Ahmedzai S, Bergman B, et al. The European Organization for  
41 Research and Treatment of Cancer QLQ-C30: a quality-of-life instrument for use in  
42 international clinical trials in oncology. J Natl Cancer Inst. 1993;85(5):365-76.
- 43 44. Walach H, Buchheld N, Buttenmüller V, et al. Measuring mindfulness—the Freiburg  
44 Mindfulness Inventory (FMI). Personality and Individual Differences. 2006;40(8):1543-  
45 55.
- 46 45. Mehnert A, Müller D, Lehmann C, et al. Die deutsche Version des NCCN Distress-  
47 Thermometers. Zeitschrift für Psychiatrie, Psychologie und Psychotherapie.  
48 2006;54(3):213-23.
- 49 46. Lowe B, Wahl I, Rose M, et al. A 4-item measure of depression and anxiety:  
50 validation and standardization of the Patient Health Questionnaire-4 (PHQ-4) in the  
51 general population. J Affect Disord. 2010;122(1-2):86-95.
- 52 47. Boss L, Lehr D, Reis D, et al. Reliability and Validity of Assessing User Satisfaction  
53 With Web-Based Health Interventions. J Med Internet Res. 2016;18(8):e234.
- 54 48. Schmidt JN, Rüdiger. ZUF-8. Fragebogen zur Messung der Patientenzufriedenheit.  
55 : Hogrefe; 2002.
- 56 49. J B. SUS: A. 'quickand dirty' usability scale. Jordan PW TB, Weerdmeester BA,  
57 McClelland IL, editor. London, Bristol, PA Taylor & Francis; 1996.
- 58 50. Jin M, Kim J. Development and Evaluation of an Evaluation Tool for Healthcare  
59 Smartphone Applications. Telemed J E Health. 2015;21(10):831-7.
- 60



- 1
- 2
- 3 51. Venkatesh, Morris, Davis, et al. User Acceptance of Information Technology:  
4 Toward a Unified View. *MIS Quarterly*. 2003;27(3).
- 5 52. Switula D. Principles of good clinical practice (GCP) in clinical research. *Sci Eng*  
6 *Ethics*. 2000;6(1):71-7.
- 7 53. Taichman DB, Sahni P, Pinborg A, et al. Data Sharing Statements for Clinical Trials  
8 - A Requirement of the International Committee of Medical Journal Editors. *N Engl J Med*.  
9 2017;376(23):2277-9.
- 10 54. Zainal NZ, Booth S, Huppert FA. The efficacy of mindfulness-based stress  
11 reduction on mental health of breast cancer patients: a meta-analysis. *Psychooncology*.  
12 2013;22(7):1457-65.
- 13 55. Rush SE, Sharma M. Mindfulness-Based Stress Reduction as a Stress Management  
14 Intervention for Cancer Care: A Systematic Review. *J Evid Based Complementary Altern*  
15 *Med*. 2017;22(2):348-60.
- 16 56. Butow P, Smith A. Systematic reviews of pain and online interventions for cancer  
17 patients show evidence of mixed efficacy and highlight need for more rigorously designed  
18 research. *Patient Educ Couns*. 2015;98(3):267-8.
- 19 57. Bouma G, Admiraal JM, de Vries EG, et al. Internet-based support programs to  
20 alleviate psychosocial and physical symptoms in cancer patients: a literature analysis.  
21 *Crit Rev Oncol Hematol*. 2015;95(1):26-37.
- 22 58. Kooistra LC, Wiersma JE, Ruwaard J, et al. Cost and Effectiveness of Blended  
23 Versus Standard Cognitive Behavioral Therapy for Outpatients With Depression in  
24 Routine Specialized Mental Health Care: Pilot Randomized Controlled Trial. *J Med Internet*  
25 *Res*. 2019;21(10):e14261.
- 26 59. Leykin Y, Thekdi SM, Shumay DM, et al. Internet interventions for improving  
27 psychological well-being in psycho-oncology: review and recommendations.  
28 *Psychooncology*. 2012;21(9):1016-25.
- 29 60. Zebrack BJ, Block R, Hayes-Lattin B, et al. Psychosocial service use and unmet  
30 need among recently diagnosed adolescent and young adult cancer patients. *Cancer*.  
31 2013;119(1):201-14.
- 32 61. Dilworth S, Higgins I, Parker V, et al. Patient and health professional's perceived  
33 barriers to the delivery of psychosocial care to adults with cancer: a systematic review.  
34 *Psychooncology*. 2014;23(6):601-12.
- 35
- 36
- 37
- 38
- 39
- 40
- 41
- 42
- 43
- 44
- 45
- 46
- 47
- 48
- 49
- 50
- 51
- 52
- 53
- 54
- 55
- 56
- 57
- 58
- 59
- 60

1  
2  
3  
4  
5  
6  
7  
8  
9  
10  
11  
12  
13  
14  
15  
16  
17  
18  
19  
20  
21  
22  
23  
24  
25  
26  
27  
28  
29  
30  
31  
32  
33  
34  
35  
36  
37  
38  
39  
40  
41  
42  
43  
44  
45  
46  
47  
48  
49  
50  
51  
52  
53  
54  
55  
56  
57  
58  
59  
60

**Figure legends**

**Figure 1.** Trial flow of the REDUCT trial.

For peer review only

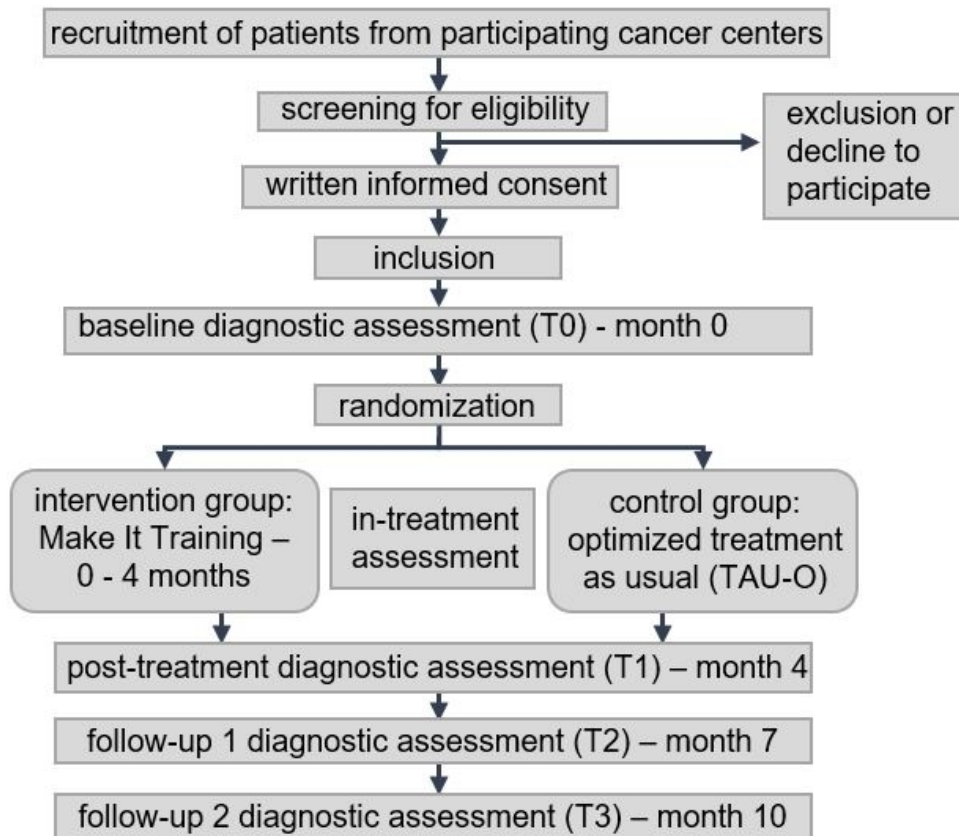

Figure 1. Trial flow of the REDUCT trial.

168x148mm (96 x 96 DPI)

1  
2  
3  
4  
5  
6  
7  
8  
9 **Web-based Mindfulness and Skills Based Distress Reduction for Cancer Patients**  
10 **- Study Protocol of the Multicentre, Randomized, Controlled Confirmatory**  
11 **Intervention Trial Reduct**  
12  
13

14  
15 **by Bäuerle et al., 2021**  
16

17  
18 **Supplementary material I**  
19  
20  
21  
22  
23  
24  
25  
26  
27  
28  
29  
30  
31  
32  
33  
34  
35  
36  
37  
38  
39  
40  
41  
42  
43  
44  
45  
46  
47  
48  
49  
50  
51  
52  
53  
54  
55  
56  
57  
58  
59  
60

For peer review only

**Table 1:** SPIRIT Guidelines

| <i>Selection/item</i>             | <i>Item no</i> | <i>Description</i>                                                                                                                                                                                                                                                                              | <i>Addressed on page no</i> |
|-----------------------------------|----------------|-------------------------------------------------------------------------------------------------------------------------------------------------------------------------------------------------------------------------------------------------------------------------------------------------|-----------------------------|
| <b>Administrative Information</b> |                |                                                                                                                                                                                                                                                                                                 |                             |
| Title                             | 1              | <i>Descriptive title identifying the study design, population, interventions, and, if applicable, trial acronym</i>                                                                                                                                                                             | 1                           |
| Trial registration                | 2a             | <i>Trial identifier and registry name. If not yet registered, name of intended registry</i>                                                                                                                                                                                                     | 3                           |
|                                   | 2b             | <i>All items from the World Health Organization Trial Registration Data Set</i>                                                                                                                                                                                                                 | 1-17                        |
| Protocol version                  | 3              | <i>Date and version identifier</i>                                                                                                                                                                                                                                                              | 4                           |
| Funding                           | 4              | <i>Sources and types of financial, material, and other support</i>                                                                                                                                                                                                                              | 17                          |
| Roles and responsibilities        | 5a             | <i>Names, affiliations, and roles of protocol contributors</i>                                                                                                                                                                                                                                  | 1-2; 17                     |
|                                   | 5b             | <i>Name and contact information for the trial sponsor</i>                                                                                                                                                                                                                                       | 17                          |
|                                   | 5c             | <i>Role of study sponsor and funders, if any, in study design; collection, management, analysis, and interpretation of data; writing of the report; and the decision to submit the report for publication, including whether they will have ultimate authority over any of these activities</i> | 17                          |
|                                   | 5d             | <i>Composition, roles, and responsibilities of the coordinating centre, steering committee, endpoint adjudication committee, data management team, and other individuals or groups overseeing the trial, if applicable (see Item 21a for data monitoring committee)</i>                         | 12-16                       |
| <b>Introduction</b>               |                |                                                                                                                                                                                                                                                                                                 |                             |
| Background and rationale          | 6a             | <i>Description of research question and justification for undertaking the trial, including summary of relevant studies (published and unpublished) examining benefits and harms for each intervention</i>                                                                                       | 2                           |
|                                   | 6b             | <i>Explanation for choice of comparators</i>                                                                                                                                                                                                                                                    | 3                           |

|                                                           |     |                                                                                                                                                                                                                                                                                                |             |
|-----------------------------------------------------------|-----|------------------------------------------------------------------------------------------------------------------------------------------------------------------------------------------------------------------------------------------------------------------------------------------------|-------------|
| Objectives                                                | 7   | Specific objectives or hypotheses                                                                                                                                                                                                                                                              | 3           |
| Trial design                                              | 8   | Description of trial design including type of trial (eg, parallel group, crossover, factorial, single group), allocation ratio, and framework (eg, superiority, equivalence, noninferiority, exploratory)                                                                                      | 3           |
| <b>Methods: Participants, interventions, and outcomes</b> |     |                                                                                                                                                                                                                                                                                                |             |
| Study setting                                             | 9   | Description of study settings (eg, community clinic, academic hospital) and list of countries where data will be collected. Reference to where list of study sites can be obtained                                                                                                             | 5-6         |
| Eligibility criteria                                      | 10  | Inclusion and exclusion criteria for participants. If applicable, eligibility criteria for study centres and individuals who will perform the interventions (eg, surgeons, psychotherapists)                                                                                                   | 5           |
| Interventions                                             | 11a | Interventions for each group with sufficient detail to allow replication, including how and when they will be administered                                                                                                                                                                     | 6-7         |
|                                                           | 11b | Criteria for discontinuing or modifying allocated interventions for a given trial participant (eg, drug dose change in response to harms, participant request, or improving/worsening disease)                                                                                                 | 4; 9; 14-15 |
|                                                           | 11c | Strategies to improve adherence to intervention protocols, and any procedures for monitoring adherence (eg, drug tablet return, laboratory tests)                                                                                                                                              | 6-7; 13-14  |
|                                                           | 11d | Relevant concomitant care and interventions that are permitted or prohibited during the trial                                                                                                                                                                                                  | 5-7         |
| Outcomes                                                  | 12  | Primary, secondary, and other outcomes, including the specific measurement variable (eg, systolic blood pressure), analysis metric (eg, change from baseline, final value, time to event), method of aggregation (eg, median, proportion), and time point for each outcome. Explanation of the | 7-11        |

|                                             |     |                                                                                                                                                                                                                                                                                                                                                                 |          |
|---------------------------------------------|-----|-----------------------------------------------------------------------------------------------------------------------------------------------------------------------------------------------------------------------------------------------------------------------------------------------------------------------------------------------------------------|----------|
|                                             |     | <i>clinical relevance of chosen efficacy and harm outcomes is strongly recommended</i>                                                                                                                                                                                                                                                                          |          |
| <i>Participant timeline</i>                 | 13  | <i>Time schedule of enrolment, interventions (including any run-ins and washouts), assessments, and visits for participants. A schematic diagram is highly recommended (see Figure 1)</i>                                                                                                                                                                       | 5; 10-11 |
| <i>Sample size</i>                          | 14  | <i>Estimated number of participants needed to achieve study objectives and how it was determined, including clinical and statistical assumptions supporting any sample size calculations</i>                                                                                                                                                                    | 11-12    |
| <i>Recruitment</i>                          | 15  | <i>Strategies for achieving adequate participant enrolment to reach target sample size</i>                                                                                                                                                                                                                                                                      | 5-6      |
| <b>Methods: Assignment of interventions</b> |     |                                                                                                                                                                                                                                                                                                                                                                 |          |
| <i>Allocation</i>                           |     |                                                                                                                                                                                                                                                                                                                                                                 |          |
| <i>Sequence generation</i>                  | 16a | <i>Method of generating the allocation sequence (eg, computer-generated random numbers), and list of any factors for stratification. To reduce predictability of a random sequence, details of any planned restriction (eg, blocking) should be provided in a separate document that is unavailable to those who enrol participants or assign interventions</i> | 12       |
| <i>Allocation concealment mechanism</i>     | 16b | <i>Mechanism of implementing the allocation sequence (eg, central telephone; sequentially numbered, opaque, sealed envelopes), describing any steps to conceal the sequence until interventions are assigned</i>                                                                                                                                                | 12       |
| <i>Implementation</i>                       | 16c | <i>Who will generate the allocation sequence, who will enrol participants, and who will assign participants to interventions</i>                                                                                                                                                                                                                                | 12       |
| <i>Blinding (masking)</i>                   | 17a | <i>Who will be blinded after assignment to interventions (eg, trial participants, care providers, outcome assessors, data analysts), and how</i>                                                                                                                                                                                                                | 12       |

|                                                           |     |                                                                                                                                                                                                                                                                                                                                                                                                                     |                |
|-----------------------------------------------------------|-----|---------------------------------------------------------------------------------------------------------------------------------------------------------------------------------------------------------------------------------------------------------------------------------------------------------------------------------------------------------------------------------------------------------------------|----------------|
|                                                           | 17b | <i>If blinded, circumstances under which unblinding is permissible, and procedure for revealing a participant's allocated intervention during the trial</i>                                                                                                                                                                                                                                                         | 12             |
| <b>Methods: Data collection, management, and analysis</b> |     |                                                                                                                                                                                                                                                                                                                                                                                                                     |                |
| <i>Data collection methods</i>                            | 18a | <i>Plans for assessment and collection of outcome, baseline, and other trial data, including any related processes to promote data quality (eg, duplicate measurements, training of assessors) and a description of study instruments (eg, questionnaires, laboratory tests) along with their reliability and validity, if known. Reference to where data collection forms can be found, if not in the protocol</i> | 7-14           |
|                                                           | 18b | <i>Plans to promote participant retention and complete follow-up, including list of any outcome data to be collected for participants who discontinue or deviate from intervention protocols</i>                                                                                                                                                                                                                    | 4-5; 10-11; 14 |
| <i>Data management</i>                                    | 19  | <i>Plans for data entry, coding, security, and storage, including any related processes to promote data quality (eg, double data entry; range checks for data values). Reference to where details of data management procedures can be found, if not in the protocol</i>                                                                                                                                            | 12-13          |
| <i>Statistical methods</i>                                | 20a | <i>Statistical methods for analysing primary and secondary outcomes. Reference to where other details of the statistical analysis plan can be found, if not in the protocol</i>                                                                                                                                                                                                                                     | 14             |
|                                                           | 20b | <i>Methods for any additional analyses (eg, subgroup and adjusted analyses)</i>                                                                                                                                                                                                                                                                                                                                     | 14             |
|                                                           | 20c | <i>Definition of analysis population relating to protocol non-adherence (eg, as randomised analysis), and any statistical methods to handle missing data (eg, multiple imputation)</i>                                                                                                                                                                                                                              | 14             |



|                                 |     |                                                                                                                                                                                                                                                                                                                                              |        |
|---------------------------------|-----|----------------------------------------------------------------------------------------------------------------------------------------------------------------------------------------------------------------------------------------------------------------------------------------------------------------------------------------------|--------|
| <b>Methods: Monitoring</b>      |     |                                                                                                                                                                                                                                                                                                                                              |        |
| <i>Data monitoring</i>          | 21a | <i>Composition of data monitoring committee (DMC); summary of its role and reporting structure; statement of whether it is independent from the sponsor and competing interests; and reference to where further details about its charter can be found, if not in the protocol. Alternatively, an explanation of why a DMC is not needed</i> | 13-14  |
|                                 | 21b | <i>Description of any interim analyses and stopping guidelines, including who will have access to these interim results and make the final decision to terminate the trial</i>                                                                                                                                                               | 13-14  |
| <i>Harms</i>                    | 22  | <i>Plans for collecting, assessing, reporting, and managing solicited and spontaneously reported adverse events and other unintended effects of trial interventions or trial conduct</i>                                                                                                                                                     | 14-15  |
| <i>Auditing</i>                 | 23  | <i>Frequency and procedures for auditing trial conduct, if any, and whether the process will be independent from investigators and the sponsor</i>                                                                                                                                                                                           | 14-15  |
| <b>Ethics and dissemination</b> |     |                                                                                                                                                                                                                                                                                                                                              |        |
| <i>Research ethics</i>          | 24  | <i>Plans for seeking research ethics committee/institutional review board (REC/IRB) approval</i>                                                                                                                                                                                                                                             | 3; 15  |
| <i>Protocol amendments</i>      | 25  | <i>Plans for communicating important protocol modifications (eg, changes to eligibility criteria, outcomes, analyses) to relevant parties (eg, investigators, REC/IRBs, trial participants, trial registries, journals, regulators)</i>                                                                                                      | 4      |
| <i>Consent or assent</i>        | 26a | <i>Who will obtain informed consent or assent from potential trial participants or authorized surrogates, and how (see Item 32)</i>                                                                                                                                                                                                          | 11; 15 |
|                                 | 26b | <i>Additional consent provisions for collection and use of participant data and biological specimens in ancillary studies, if applicable</i>                                                                                                                                                                                                 | 12-13  |
| <i>Confidentiality</i>          | 27  | <i>How personal information about potential and enrolled participants</i>                                                                                                                                                                                                                                                                    | 12-13  |

|                                      |     |                                                                                                                                                                                                                                                                                            |                |
|--------------------------------------|-----|--------------------------------------------------------------------------------------------------------------------------------------------------------------------------------------------------------------------------------------------------------------------------------------------|----------------|
|                                      |     | <i>will be collected, shared, and maintained in order to protect confidentiality before, during, and after the trial</i>                                                                                                                                                                   |                |
| <i>Declaration of interests</i>      | 28  | <i>Financial and other competing interests for principal investigators for the overall trial and each study site</i>                                                                                                                                                                       | 17             |
| <i>Access to data</i>                | 29  | <i>Statement of who will have access to the final trial dataset, and disclosure of contractual agreements that limit such access for investigators</i>                                                                                                                                     | 12-13          |
| <i>Ancillary and post-trial care</i> | 30  | <i>Provisions, if any, for ancillary and post-trial care, and for compensation to those who suffer harm from trial participation</i>                                                                                                                                                       | Not applicable |
| <i>Dissemination policy</i>          | 31a | <i>Plans for investigators and sponsor to communicate trial results to participants, healthcare professionals, the public, and other relevant groups (eg, via publication, reporting in results databases, or other data sharing arrangements), including any publication restrictions</i> | 12-13          |
|                                      | 31b | <i>Authorship eligibility guidelines and any intended use of professional writers</i>                                                                                                                                                                                                      | 12-13          |
|                                      | 31c | <i>Plans, if any, for granting public access to the full protocol, participant-level dataset, and statistical code</i>                                                                                                                                                                     | 12-13          |
| <b>Appendices</b>                    |     |                                                                                                                                                                                                                                                                                            |                |
| <i>Informed consent materials</i>    | 32  | <i>Model consent form and other related documentation given to participants and authorized surrogates</i>                                                                                                                                                                                  | II             |
| <i>Biological specimens</i>          | 33  | <i>Plans for collection, laboratory evaluation, and storage of biological specimens for genetic or molecular analysis in the current trial and for future use in ancillary studies, if applicable</i>                                                                                      | Not applicable |

Teilnehmer-ID: \_\_\_\_\_

# Reduct- Web-Basierte Achtsamkeits- und Skillsbasierte Stressreduktion für Patientinnen und Patienten mit Krebs

## Darf der Abbruchfragebogen bei Studienabbruch verschickt werden?

Muss auf der Einwilligungserklärung angekreuzt sein

- Ja  Nein

## I. Onkologische Anamnese

1) Welche Tumorerkrankung (Primär Erkrankung für den Studieneinschluss) ist aktuell bzw. in den letzten 12 Monaten aufgetreten (Hier nur eine Auswahl treffen)?

- Kopf-Hals-Tumore (C00-14, C30-33)
- Oberer GI-Trakt (C15-16)
- Darm (C17-21)
- Leber/ Gallenblase (C22-24)
- Pankreas (C25)
- Lunge (C33-34)
- Haut (C43)
- Muskuloskelettale Tumore (C40-41, C45-49)
- Brust (D05, C50)
- weibl. Genitale (C51-56)
- männl. Genitale (C60-62)

- 1  
2  
3  Harnorgane (C64, C67)  
4  
5  Neuroonkologische Tumore (C70-72)  
6  
7  Endokrine Tumore (C73)  
8  
9  Lymphatisches, blutbildendes Gewebe (C81-85, C90-95)  
10  
11  Kopf-Hals-Tumore (C00-14, C30-33)  
12  
13  Cancer of Unknown Primary (CUP)  
14  
15  Andere, genaue Diagnosen: \_\_\_\_\_  
16  
17  
18  
19

## 2) Krankheitssituation

2.1 TNM Stadium: T \_\_\_\_\_ N \_\_\_\_\_ M \_\_\_\_\_

Falls TNM Klassifikation nicht auf Tumorerkrankung anwendbar, bitte hier das Tumorstadium spezifizieren:

2.2 Ersterkrankung, Datum der Diagnosestellung \_\_\_\_\_

2.3 Kam es zu einem Wiederauftreten der Erkrankung? (Rezidiv)

- Ja  Nein

Wann aufgetreten? \_\_\_\_\_

Wo aufgetreten?

- |                                             |                                      |                                                                              |
|---------------------------------------------|--------------------------------------|------------------------------------------------------------------------------|
| <input type="checkbox"/> Bauchspeicheldrüse | <input type="checkbox"/> Harnblase   | <input type="checkbox"/> Blut                                                |
| <input type="checkbox"/> Darm               | <input type="checkbox"/> Gallenblase | <input type="checkbox"/> Gebärmutter                                         |
| <input type="checkbox"/> Blutgefäße /Adern  | <input type="checkbox"/> Gehirn      | <input type="checkbox"/> Geschlechtsorgane<br>(Hoden, Penis, Zervix, Vagina) |
| <input type="checkbox"/> Haut               | <input type="checkbox"/> Herz        | <input type="checkbox"/> Leber                                               |
| <input type="checkbox"/> Lunge              | <input type="checkbox"/> Magen       | <input type="checkbox"/> Milz                                                |



1  
2  
3  
4  
5 **5) Therapieform: Welche wurden oder werden aktuell angewendet?**  
6

7  
8  
9

|                            | Aktuell                  | Abgeschlossen in den<br>letzten 12 Monaten | Vorher<br>abgeschlossen  |
|----------------------------|--------------------------|--------------------------------------------|--------------------------|
| 10 Operation               | <input type="checkbox"/> | <input type="checkbox"/>                   | <input type="checkbox"/> |
| 11 Strahlentherapie        | <input type="checkbox"/> | <input type="checkbox"/>                   | <input type="checkbox"/> |
| 12 Chemotherapie           | <input type="checkbox"/> | <input type="checkbox"/>                   | <input type="checkbox"/> |
| 13 Antihormonelle Therapie | <input type="checkbox"/> | <input type="checkbox"/>                   | <input type="checkbox"/> |
| 14 Immuntherapie           | <input type="checkbox"/> | <input type="checkbox"/>                   | <input type="checkbox"/> |
| 15 Supportivtherapie       | <input type="checkbox"/> | <input type="checkbox"/>                   | <input type="checkbox"/> |
| 16 Zelltherapie            | <input type="checkbox"/> | <input type="checkbox"/>                   | <input type="checkbox"/> |
| 17 Stammzelltherapie       | <input type="checkbox"/> | <input type="checkbox"/>                   | <input type="checkbox"/> |
| 18 Keine                   | <input type="checkbox"/> | <input type="checkbox"/>                   | <input type="checkbox"/> |
| 19 Sonstige                | <input type="checkbox"/> | <input type="checkbox"/>                   | <input type="checkbox"/> |

20  
21  
22  
23  
24  
25  
26  
27  
28  
29  
30  
31  
32  
33  
34

35 **II. Psychosomatische Anamnese**  
36

37 **1) Liegt oder lag eine psychische Begleiterkrankung vor**  
38

39  Nein

40

41  
42  
43  
44

|                                               | Aktuell                  | Zustand nach             |
|-----------------------------------------------|--------------------------|--------------------------|
| 45 Alkoholismus (F10.2)                       | <input type="checkbox"/> | <input type="checkbox"/> |
| 46 Bipolare Affektive Störung (F31)           | <input type="checkbox"/> | <input type="checkbox"/> |
| 47 Depressive Episode (F32)                   | <input type="checkbox"/> | <input type="checkbox"/> |
| 48 Rezidivierende Depressive Störung (F33)    | <input type="checkbox"/> | <input type="checkbox"/> |
| 49 Panikstörung (F41.0)                       | <input type="checkbox"/> | <input type="checkbox"/> |
| 50 Generalisierte Angststörung (F41.1)        | <input type="checkbox"/> | <input type="checkbox"/> |
| 51 Zwangsstörung (F42)                        | <input type="checkbox"/> | <input type="checkbox"/> |
| 52 Posttraumatische Belastungsstörung (F43.1) | <input type="checkbox"/> | <input type="checkbox"/> |
| 53 Anpassungsstörung (F43.2)                  | <input type="checkbox"/> | <input type="checkbox"/> |
| 54 Essstörung (F50)                           | <input type="checkbox"/> | <input type="checkbox"/> |

55  
56  
57  
58  
59  
60

Andere, nämlich (Bezeichnung und ICD Code angeben): \_\_\_\_\_   Ja, und zwar:

**2) Aktuelle Einnahme von Psychopharmaka:**

- Nein
- Ja, folgende: \_\_\_\_\_  
 Dosis \_\_\_\_\_  
 Seit wann? \_\_\_\_\_  
 Stabile Dosis  Ja  Nein

**3) Aktuelle oder vergangene psychotherapeutische/psychosomatische/psychiatrische Behandlung:**

|                                        |                          |                                                        |                                     |
|----------------------------------------|--------------------------|--------------------------------------------------------|-------------------------------------|
| <input type="checkbox"/> Keine         |                          |                                                        |                                     |
| <input type="checkbox"/> Ja, folgende: |                          |                                                        |                                     |
|                                        | Aktuell                  | Abgeschlossen<br>innerhalb der<br>letzten 12<br>Monate | Vorher<br>abgeschlossen             |
| Psychoonkologische Behandlung          | <input type="checkbox"/> | <input type="checkbox"/>                               | <input type="checkbox"/>            |
| Ambulante Psychotherapie               | <input type="checkbox"/> | <input type="checkbox"/>                               | <input type="checkbox"/>            |
| Psychosomatischer Klinikaufenthalt     | <input type="checkbox"/> | <input type="checkbox"/>                               | <input type="checkbox"/>            |
| Psychiatrischer Klinikaufenthalt       | <input type="checkbox"/> | <input type="checkbox"/>                               | <input checked="" type="checkbox"/> |

Andere

---

### III. Gesundheitsökonomische Fragen

#### 1. Lag bei Ihnen innerhalb der letzten 3 Monate eine Arbeitsunfähigkeit (AU) vor?

- nein  
 ja

wenn ja, bitte geben Sie den Zeitraum jeder AU mit Datum an und fassen dabei die Dauer für jede zusammenhängende AU (Folgebescheinigungen) wegen derselben Erkrankung zusammen.

1. AU: von \_\_\_\_\_.\_\_\_\_.\_\_\_\_ (TT.MM.JJJJ) bis \_\_\_\_\_.\_\_\_\_.\_\_\_\_ (TT.MM.JJJJ)  
 2. AU: von \_\_\_\_\_.\_\_\_\_.\_\_\_\_ (TT.MM.JJJJ) bis \_\_\_\_\_.\_\_\_\_.\_\_\_\_ (TT.MM.JJJJ)  
 3. AU: von \_\_\_\_\_.\_\_\_\_.\_\_\_\_ (TT.MM.JJJJ) bis \_\_\_\_\_.\_\_\_\_.\_\_\_\_ (TT.MM.JJJJ)  
 4. AU: von \_\_\_\_\_.\_\_\_\_.\_\_\_\_ (TT.MM.JJJJ) bis \_\_\_\_\_.\_\_\_\_.\_\_\_\_ (TT.MM.JJJJ)  
 5. AU: von \_\_\_\_\_.\_\_\_\_.\_\_\_\_ (TT.MM.JJJJ) bis \_\_\_\_\_.\_\_\_\_.\_\_\_\_ (TT.MM.JJJJ)

#### 2. Bezogen Sie in den letzten 3 Monaten bzw. beziehen Sie aktuell Krankengeld?

- nein  
 ja

wenn ja, geben Sie bitte den Zeitraum des Krankengeldbezugs an:

von \_\_\_\_\_.\_\_\_\_.\_\_\_\_ (TT.MM.JJJJ) bis \_\_\_\_\_.\_\_\_\_.\_\_\_\_ (TT.MM.JJJJ)

#### 3. Hatten Sie innerhalb der letzten 3 Monate Kontakt mit einer ambulanten Arztpraxis (inkl. Rezept/Überweisung abholen, Blutabnahme, telefonische Beratung, Impfung und Hausbesuch)? Bitte beziehen Sie Arztkontakte im Rahmen der Reduct-Studie nicht ein.

- nein  
 ja, welche:

- Hausärztin/ Hausarzt Anzahl Besuche: \_\_\_\_  
 Augenärztin/ Augenarzt Anzahl Besuche: \_\_\_\_  
 Chirurgin/ Chirurg: Anzahl Besuche: \_\_\_\_  
 Gynäkologin/Gynäkologe: Anzahl Besuche: \_\_\_\_





- 1  
2  
3  Stationär  
4  
5  Teilstationär (Tages-/Nachklinik)  
6  
7  andere Abteilungen (primär körperliche Erkrankungen/Behandlungen)  
8

9 Aufenthalt 3 von \_\_\_\_\_.\_\_\_\_(TT.MM.JJJJ) bis \_\_\_\_\_.\_\_\_\_(TT.MM.JJJJ)

- 10  Psychiatrisch-psychotherapeutische Behandlung  
11  
12  Psychosomatisch-psychotherapeutische Behandlung  
13  
14  Stationär  
15  
16  Teilstationär (Tages-/Nachklinik)  
17  
18  andere Abteilungen (primär körperliche Erkrankungen/Behandlungen)  
19

20 **5. Haben Sie innerhalb der letzten 3 Monate an einer Rehabilitations-Maßnahme**  
21 **teilgenommen?**  
22

- 23  
24  nein  
25  
26  ja

27 wenn ja, geben Sie bitte den Zeitraum des Reha-Aufenthaltes an und machen Angaben zum  
28 Grund des Aufenthaltes, zur Abteilung und zur Unterbringungsform:  
29

30  
31 Aufenthalt 1 von \_\_\_\_\_.\_\_\_\_(TT.MM.JJJJ) bis \_\_\_\_\_.\_\_\_\_(TT.MM.JJJJ)

- 32  andere Abteilungen (primär körperliche Erkrankungen/ Behandlungen)  
33  
34  wegen einer sonstigen psychischen Erkrankung  
35  
36  Stationär  
37  
38  Teilstationär (Tages-/Nachklinik)

39 Aufenthalt 2 von \_\_\_\_\_.\_\_\_\_(TT.MM.JJJJ) bis \_\_\_\_\_.\_\_\_\_(TT.MM.JJJJ)

- 40  
41  andere Abteilungen (primär körperliche Erkrankungen/ Behandlungen)  
42  
43  wegen einer sonstigen psychischen Erkrankung  
44  
45  Stationär  
46  
47  Teilstationär (Tages-/Nachklinik)

48 **6. Haben Sie innerhalb der letzten 3 Monate Medikamente eingenommen?**  
49

- 50  nein  ja

51 wenn ja, geben Sie bitte den Medikamentennamen/Wirkstoff an, die Ihnen von einem Arzt  
52 verordnet wurden, die Dosis pro Tag und die Einnahmedauer an:  
53

54 1. Medikament: \_\_\_\_\_ Tagesdosis: \_\_\_\_\_

55 Einnahme von \_\_\_\_\_.\_\_\_\_(TT.MM.JJJJ) bis \_\_\_\_\_.\_\_\_\_(TT.MM.JJJJ), ganzer Zeitraum

56  
57  
58 2. Medikament: \_\_\_\_\_ Tagesdosis: \_\_\_\_\_  
59  
60

# Reduct

9

1  
2  
3 Einnahme von \_\_\_\_\_.\_\_\_\_(TT.MM.JJJJ) bis \_\_\_\_\_.\_\_\_\_(TT.MM.JJJJ), ganzer Zeitraum

4  
5  
6 3. Medikament: \_\_\_\_\_ Tagesdosis: \_\_\_\_\_

7 Einnahme von \_\_\_\_\_.\_\_\_\_(TT.MM.JJJJ) bis \_\_\_\_\_.\_\_\_\_(TT.MM.JJJJ), ganzer Zeitraum

8  
9  
10 4. Medikament: \_\_\_\_\_ Tagesdosis: \_\_\_\_\_

11 Einnahme von \_\_\_\_\_.\_\_\_\_(TT.MM.JJJJ) bis \_\_\_\_\_.\_\_\_\_(TT.MM.JJJJ), ganzer Zeitraum

12  
13  
14 5. Medikament: \_\_\_\_\_ Tagesdosis: \_\_\_\_\_

15 Einnahme von \_\_\_\_\_.\_\_\_\_(TT.MM.JJJJ) bis \_\_\_\_\_.\_\_\_\_(TT.MM.JJJJ), ganzer Zeitraum

16  
17  
18 6. Medikament: \_\_\_\_\_ Tagesdosis: \_\_\_\_\_

19 Einnahme von \_\_\_\_\_.\_\_\_\_(TT.MM.JJJJ) bis \_\_\_\_\_.\_\_\_\_(TT.MM.JJJJ), ganzer Zeitraum

1  
2  
3  
4  
5  
6 **7. Haben Sie innerhalb der letzten 3 Monate Heilmittel in Anspruch genommen (z.B.**  
7 **Physiotherapie, Logopädie, Ergotherapie)?**

8  nein

9  ja

10  Physiotherapie: Anzahl Besuche: \_\_\_\_

11  
12  Logopädie: Anzahl Besuche: \_\_\_\_

13  
14  
15  Ergotherapie/Arbeitstherapie: Anzahl Besuche: \_\_\_\_

16  
17  Soziotherapie: Anzahl Besuche: \_\_\_\_

18  
19  Tanztherapie/Bewegungstherapie: Anzahl Besuche: \_\_\_\_

20  
21  Einzel  Gruppe

22  
23  Kreativtherapie: Anzahl Besuche: \_\_\_\_

24  
25  Einzel  Gruppe

26  
27  Kunsttherapie: Anzahl Besuche: \_\_\_\_

28  
29  Einzel  Gruppe

30  
31  Musiktherapie: Anzahl Besuche: \_\_\_\_

32  
33  Einzel  Gruppe

34  
35  Theatertherapie: Anzahl Besuche: \_\_\_\_

36  
37  Einzel  Gruppe

38  
39  Entspannungstechniken (autogenes Training) /progressive  
40 Muskelentspannung): Anzahl Besuche: \_\_\_\_

41  
42  Einzel  Gruppe

43  
44  sonstige, und zwar: \_\_\_\_\_ Anzahl Besuche: \_\_\_\_

45  
46  Einzel  Gruppe

8. Haben Sie innerhalb der letzten 3 Monate folgende Angebote in Anspruch genommen?

(Nicht im Rahmen eines ambulanten Arzt-/Psychotherapeutenkontaktes oder Krankenhauskontakts)

Psychoonkologische Beratungsstelle:

Anzahl Kontakte: \_\_\_\_ durchschnittliche Dauer pro Kontakt: \_\_\_\_ Minuten

Beratungsstelle bei psychischen Problemen:

Anzahl Kontakte: \_\_\_\_ durchschnittliche Dauer pro Kontakt: \_\_\_\_ Minuten

Sozialpsychiatrischer Dienst/Psychosozialer Krisendienst:

Anzahl Kontakte: \_\_\_\_ durchschnittliche Dauer pro Kontakt: \_\_\_\_ Minuten

Tagesstätten/Kontaktstätten für Menschen mit psychischen Problemen:

Anzahl Kontakte: \_\_\_\_ durchschnittliche Dauer pro Kontakt: \_\_\_\_ Minuten

Selbsthilfegruppen aufgrund psychischer Probleme:

Anzahl Kontakte: \_\_\_\_ durchschnittliche Dauer pro Kontakt: \_\_\_\_ Minuten

weitere Angebote aufgrund psychischer Probleme (z.B. Sorgentelefon)

und zwar: \_\_\_\_\_

Anzahl Kontakte: \_\_\_\_ durchschnittliche Dauer pro Kontakt: \_\_\_\_ Minuten

9. Bitte geben Sie an, ob bei Ihnen aktuell ein **Pflegegrad** vorliegt.

nein

ja, seit \_\_\_\_\_

Pflegegrad 1

Pflegegrad 2

Pflegegrad 3

Pflegegrad 4

Pflegegrad 5

10. Bitte geben Sie an, ob Sie Leistungen der Pflegekasse beziehen.

nein

ja

Pflegegeld für häusliche Pflege

Pflegesachleistungen für häusliche Pflege

- kombinierte Pflegegeld und Pflegesachleistung
- Entlastungsbetrag bei häuslicher Pflege
- Wohnumfeld verbessernde Maßnahmen
- Pflegesachleistungen für teilstationäre Pflege
- Pflegesachleistungen für vollstationäre Pflege
- zum Verbrauch bestimmte Pflegehilfsmittel

#### IV. Ihr derzeitiges Befinden

Bitte beantworten Sie im Folgenden, wie sehr die jeweilige Aussage in der letzten Woche auf Sie zutraf.

1.1. Ich fühle mich angespannt oder überreizt.

- 3 meistens
- 2 oft
- 1 von Zeit zu Zeit/ gelegentlich
- 0 überhaupt nicht

1.2. Ich fühle mich in meinen Aktivitäten gebremst.

- 3 fast immer
- 2 sehr oft
- 1 manchmal
- 0 überhaupt nicht

1.3. Ich kann mich heute noch so freuen wie früher.

- 0 ganz genau so
- 1 nicht ganz so sehr
- 2 Nur noch ein wenig
- 3 kaum oder gar nicht

1.4. Ich habe manchmal ein ängstliches Gefühl in der Magengegend.

- 0 überhaupt nicht
- 1 gelegentlich
- 2 ziemlich oft
- 3 sehr oft

1.5. Mich überkommt eine ängstliche Vorahnung, dass etwas Schreckliches passieren könnte.

- 3 ja, sehr stark
- 2 ja, aber nicht allzu stark
- 1 etwas, aber es macht mir keine Sorgen
- 0 überhaupt nicht

1.6. Ich habe das Interesse an meiner äußeren Erscheinung verloren.

- 3 ja, stimmt genau
- 2 ich kümmere mich nicht so sehr darum, wie ich sollte
- 1 möglicherweise kümmere ich mich zu wenig darum

0 ich kümmere mich so viel darum wie immer

1.7. Ich kann lachen und die lustige Seite der Dinge sehen.

- 0 ja, so viel wie immer
- 1 nicht mehr ganz so viel
- 2 inzwischen viel weniger
- 3 überhaupt nicht

1.8. Ich fühle mich rastlos, muss immer in Bewegung sein.

- 3 ja, tatsächlich sehr
- 2 ziemlich
- 1 nicht sehr
- 0 überhaupt nicht

1.9. Mir gehen beunruhigende Gedanken durch den Kopf.

- 3 einen Großteil der Zeit
- 2 verhältnismäßig oft
- 1 von Zeit zu Zeit, aber nicht allzu oft
- 0 nur gelegentlich/nie

1.10. Ich blicke mit Freude in die Zukunft.

- 0 ja, sehr
- 1 eher weniger als früher
- 2 viel weniger als früher
- 3 kaum bis gar nicht

1.11. Ich fühle mich glücklich.

- 3 überhaupt nicht
- 2 selten
- 1 manchmal
- 0 meistens

1.12. Mich überkommt plötzlich ein panikartiger Zustand.

- 3 ja, tatsächlich sehr oft
- 2 ziemlich oft
- 1 nicht sehr oft
- 0 überhaupt nicht

1.13. Ich kann behaglich dasitzen und mich entspannen.

- 0 ja, natürlich
- 1 gewöhnlich schon
- 2 nicht oft
- 3 überhaupt nicht

1.14. Ich kann mich an einem guten Buch, einer Radio- oder Fernsehsendung erfreuen.

- 0 oft
- 1 manchmal
- 2 Eher selten
- 3 Sehr selten

1  
2  
3  
4  
5  
6  
7  
8  
9  
10  
11  
12  
13  
14  
15  
16  
17  
18  
19  
20  
21  
22  
23  
24  
25  
26  
27  
28  
29  
30  
31  
32  
33  
34  
35  
36  
37  
38  
39  
40  
41  
42  
43  
44  
45  
46  
47  
48  
49  
50  
51  
52  
53  
54  
55  
56  
57  
58  
59  
60

For peer review only



Teilnehmer-ID: \_\_\_\_\_

# Reduct- Web-Basierte Achtsamkeits- und Skillsbasierte Stressreduktion für Patientinnen und Patienten mit Krebs

Liebe Teilnehmerin, lieber Teilnehmer,

wir freuen uns, dass Sie uns bei unserer Studie unterstützen. Im Folgenden werden Sie nun einen Fragebogen ausfüllen, mit dessen Hilfe wir Daten zur Ihrer Lebenssituation, Ihr psychisches Befinden, Ihre Einstellung zu digitalen Gesundheitsanwendungen sowie Ihre Nutzung von digitalen Technologien allgemein erheben. Wir bitten Sie daher die folgenden Fragen möglichst genau zu beantworten. Der Fragebogen wird ca. 15-20 Minuten Ihrer Zeit in Anspruch nehmen.

Nachdem Sie unseren Fragebogen bearbeitet haben, werden Sie weitere Informationen sowie ihre Zugangsdaten für die Web-App erhalten.

Sollten Sie Fragen haben, können Sie gerne jederzeit eine E-Mail an [reduct@uni-due.de](mailto:reduct@uni-due.de) senden.

Wenn Sie merken, dass Sie sich sehr belastet fühlen und Sie mehr Unterstützung bei der Bewältigung Ihrer Erkrankung benötigen, können Sie sich jederzeit an die/den Studienverantwortliche/n Ihres Zentrums [1] wenden. Diese/r kann Ihnen bei der Suche psychoonkologischer Hilfsangebote zur Seite stehen.

Wir wünschen Ihnen weiterhin alles Gute und danken Ihnen für das Ausfüllen des Fragebogens

Ihr Reduct Team

\*Kontaktdaten

[2]

**I. Fragen zu Soziodemographischen Daten**

**1.1. Füllen Sie den Fragebogen gerade im Rahmen einer stationären Behandlung aus?**

- ja  nein

**1.2. Geschlecht:**

- weiblich  männlich  inter/ divers

**1.3. Alter:**

\_\_\_\_\_ Jahre

**1.4. Familienstand**

- ledig
- verheiratet
- in Partnerschaft lebend
- geschieden/ getrennt
- verwitwet
- sonstiges (bitte nennen) \_\_\_\_\_

**1.5. Wie viele Personen leben in Ihrem Haushalt?**

- 1 Person
- 2 Personen
- 3 Personen
- 4 Personen
- 5 Personen
- mehr als 5 Personen, nämlich: \_\_\_\_\_

**1.6. Haben Sie Kinder?**

- ja  nein

**1.7. Leben Kinder dauerhaft in Ihrem Haushalt, die von Ihnen versorgt werden?**

- ja  nein

**1.8. Bitte geben Sie an, in welcher Art Stadt oder Gemeinde Sie wohnen:**

- Großstadt (ab 100.000 Einwohner)
- Mittelstadt (ab 20.000 Einwohner)
- Kleinstadt (ab 5.000 Einwohner)
- Landgemeinde (unter 5.000 Einwohner)

**1.9. Bitte geben Sie Ihren höchsten Bildungsabschluss an:**

- abgeschlossenes (Fach-) Hochschulstudium
- Fachabitur/Abitur
- Realschulabschluss

- 1  
2  
3  
4  Hauptschule/ Volksschule  
5  
6  kein Schlussabschluss  
7  
8  sonstiges (bitte nennen) \_\_\_\_\_  
9

10  
11  
12  
13 **1.10. Bitte geben Sie an, welcher Beschäftigungsstatus auf Sie zutrifft.**  
14

- 15  noch in Ausbildung (Ausbildung, Studium etc.)  
16  
17 wenn ja:  
18  Aktiv, keine längere Unterbrechungen aufgrund der Erkrankung  
19  Derzeit krankgeschrieben/ Urlaubssemester  
20  
21  
22  Erwerbstätig  
23  
24 wenn ja:  
25  
26  Teilzeitbeschäftigt  
27  Vollzeitbeschäftigt  
28  geringfügig beschäftigt (Minijob)  
29  Zeitarbeit  
30  Sonstiges (bitte nennen) \_\_\_\_\_  
31  
32  
33  
34  nicht erwerbstätig  
35  
36 wenn ja:  
37  
38  derzeit krankgeschrieben  
39  berufsunfähig, wenn zutreffend:  
40 wenn ja:  seit der Krebserkrankung  schon vorher  
41  
42  berentet/pensioniert  
43  Sonstiges (bitte nennen) \_\_\_\_\_  
44  
45  
46  
47  
48

49 **1.11. Ist/war Ihre finanzielle Situation durch Ihre Krebserkrankung belastet?**  
50

51 1  
52 Nicht  
53 belastet



10  
54 Sehr  
55 belastet

1  
2  
3  
4  
5  
6  
7  
8  
9  
10  
11  
12  
13  
14  
15  
16  
17  
18  
19  
20  
21  
22  
23  
24  
25  
26  
27  
28  
29  
30  
31  
32  
33  
34  
35  
36  
37  
38  
39  
40  
41  
42  
43  
44  
45  
46  
47  
48  
49  
50  
51  
52  
53  
54  
55  
56  
57  
58  
59  
60

### 1.12. Wie schätzen Sie Ihre finanzielle Situation ein?

1  
Schlecht

10  
Gut

Da wir messen wollen, ob und wie das Reduct-Angebot von allen Bevölkerungsgruppen, also ebenfalls von Migranten und ausländischen Mitbürgern, angenommen wird, stellen wir Ihnen Fragen zur Nationalität.

### 1.13. Besitzen Sie die deutsche Staatsangehörigkeit?

- ja  nein

Wenn ja:

- seit Geburt  
 seit \_\_\_\_\_ (bitte, Jahreszahl einsetzen)

### 1.14 Besitzen/besaßen Ihre Eltern beide die deutsche Staatsangehörigkeit seit der Geburt?

- ja  nein

## 2. Belastungsthermometer

Bitte markieren Sie am Thermometer die Zahl, die am besten beschreibt, wie belastet Sie sich in der letzten Woche einschließlich heute gefühlt haben.

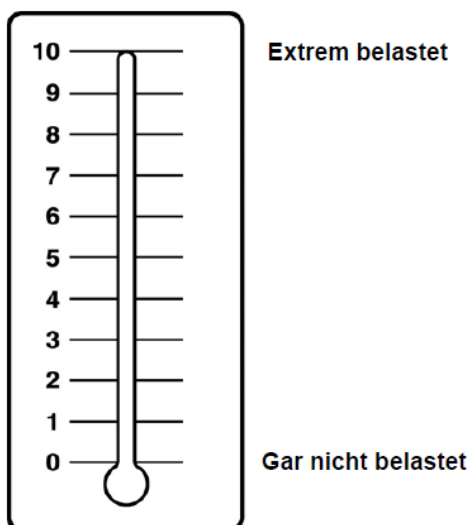

### 3. Skala zur Allgemeinen Selbstwirksamkeitserwartung

Kreuzen Sie bitte bei jeder Frage die Antwort an, die am besten auf Sie zutrifft.

|                                                                                                    | Stimmt<br>nicht | Stimmt<br>kaum | Stimmt<br>eher | Stimmt<br>genau |
|----------------------------------------------------------------------------------------------------|-----------------|----------------|----------------|-----------------|
| 3.1. Wenn sich Widerstände auftun, finde ich Mittel und Wege, mich durchzusetzen.                  | 1               | 2              | 3              | 4               |
| 3.2. Die Lösung schwieriger Probleme gelingt mir immer, wenn ich mich darum bemühe.                | 1               | 2              | 3              | 4               |
| 3.3. Es bereitet mir keine Schwierigkeiten, meine Absichten und Ziele zu verwirklichen.            | 1               | 2              | 3              | 4               |
| 3.4. In unerwarteten Situationen weiß ich immer, wie ich mich verhalten soll.                      | 1               | 2              | 3              | 4               |
| 3.5. Auch bei überraschenden Ereignissen glaube ich, dass ich gut mit ihnen zurechtkommen kann.    | 1               | 2              | 3              | 4               |
| 3.6. Schwierigkeiten sehe ich gelassen entgegen, weil ich meinen Fähigkeiten immer vertrauen kann. | 1               | 2              | 3              | 4               |
| 3.7. Was auch immer passiert, ich werde schon klarkommen.                                          | 1               | 2              | 3              | 4               |
| 3.8. Für jedes Problem kann ich eine Lösung finden.                                                | 1               | 2              | 3              | 4               |
| 3.9. Wenn eine neue Sache auf mich zukommt, weiß ich, wie ich damit umgehen kann.                  | 1               | 2              | 3              | 4               |
| 3.10. Wenn ein Problem auftaucht, kann ich es aus eigener Kraft meistern.                          | 1               | 2              | 3              | 4               |

**4. Lebensqualität (EORT-QLQ-C30)**

Bitte kreuzen Sie im Folgenden Abschnitt die Zahl von 1 bis 4 an, die am besten auf Sie zutrifft.

For peer review only

|                                                                                                                                      | Überhaupt<br>nicht | Wenig | Mäßig | Sehr |
|--------------------------------------------------------------------------------------------------------------------------------------|--------------------|-------|-------|------|
| 4.1. Bereitet es Ihnen Schwierigkeiten, sich körperlich anzustrengen (z.B. eine schwere Einkaufstasche oder einen Koffer zu tragen)? | 1                  | 2     | 3     | 4    |
| 4.2. Bereitet es Ihnen Schwierigkeiten, einen <u>längeren</u> Spaziergang zu machen?                                                 | 1                  | 2     | 3     | 4    |
| 4.3. Bereitet es Ihnen Schwierigkeiten, eine <u>kurze</u> Strecke außer Haus zu gehen?                                               | 1                  | 2     | 3     | 4    |
| 4.4. Müssen Sie tagsüber im Bett liegen oder in einem Sessel sitzen?                                                                 | 1                  | 2     | 3     | 4    |
| 4.5. Brauchen Sie Hilfe beim Essen, Anziehen, Waschen oder Benutzen der Toilette?                                                    | 1                  | 2     | 3     | 4    |
| <b>Während der letzten Woche:</b>                                                                                                    |                    |       |       |      |
|                                                                                                                                      | Überhaupt<br>nicht | Wenig | Mäßig | Sehr |
| 4.6. Waren Sie bei Ihrer Arbeit oder bei anderen tagtäglichen Beschäftigungen eingeschränkt?                                         | 1                  | 2     | 3     | 4    |
| 4.7. Waren Sie bei Ihren Hobbys oder andere Freizeitbeschäftigungen eingeschränkt?                                                   | 1                  | 2     | 3     | 4    |
| 4.8. Waren Sie kurzatmig?                                                                                                            | 1                  | 2     | 3     | 4    |
| 4.9. Hatten Sie Schmerzen?                                                                                                           | 1                  | 2     | 3     | 4    |
| 4.10. Mussten Sie sich ausruhen?                                                                                                     | 1                  | 2     | 3     | 4    |



4.11. Hatten Sie Schlafstörungen?

1 2 3 4

4.12. Fühlten Sie sich schwach?

1 2 3 4

**Während der letzten Woche:**

**Überhaupt  
nicht**

**Wenig**

**Mäßig**

**Sehr**

4.13. Hatten Sie Appetitmangel?

1 2 3 4

4.14. War Ihnen übel?

1 2 3 4

4.15. Haben Sie erbrochen?

1 2 3 4

4.16. Hatten Sie Verstopfung?

1 2 3 4

4.17. Hatten Sie Durchfall?

1 2 3 4

4.18. Waren Sie müde?

1 2 3 4

4.19. Fühlten Sie sich durch  
Schmerzen in Ihrem alltäglichen  
Leben beeinträchtigt?

1 2 3 4

4.20. Hatten Sie Schwierigkeiten, sich  
auf etwas zu konzentrieren, z.B. auf  
das Zeitungslesen oder das  
Fernsehen?

1 2 3 4

4.21. Fühlten Sie sich angespannt?

1 2 3 4

4.22. Haben Sie sich Sorgen  
gemacht?

1 2 3 4

4.23. Waren Sie reizbar?

1 2 3 4

4.24. Fühlten Sie sich  
niedergeschlagen?

1 2 3 4

4.25. Hatten Sie Schwierigkeiten, sich  
an Dinge zu erinnern?

1 2 3 4



## 5. Lebensqualität (EQ-5D-5L)

Bitte kreuzen Sie unter jeder Überschrift das Kästchen an, das Ihren Gesundheitszustand heute am besten beschreibt.

### 5.1. Beweglichkeit/Mobilität

- |                                         |   |
|-----------------------------------------|---|
| Ich habe keine Probleme herumzugehen    | 1 |
| Ich habe leichte Probleme herumzugehen  | 2 |
| Ich habe mäßige Probleme herumzugehen   | 3 |
| Ich habe große Probleme herumzugehen    | 4 |
| Ich bin nicht in der Lage, herumzugehen | 5 |

### 5.2. Für sich selbst sorgen

- |                                                                   |   |
|-------------------------------------------------------------------|---|
| Ich habe keine Probleme, mich selbst zu waschen oder anzuziehen   | 1 |
| Ich habe leichte Probleme, mich selbst zu waschen oder anzuziehen | 2 |
| Ich habe mäßige Probleme, mich selbst zu waschen oder anzuziehen  | 3 |
| Ich habe große Probleme, mich selbst zu waschen oder anzuziehen   | 4 |
| Ich bin nicht in der Lage, mich selbst zu waschen oder anzuziehen | 5 |

### 5.3. Alltägliche Tätigkeiten (z.B. Arbeit, Studium, Hausarbeit, Familien- oder Freizeitaktivitäten)

- |                                                                        |   |
|------------------------------------------------------------------------|---|
| Ich habe keine Probleme, meinen alltäglichen Tätigkeiten nachzugehen   | 1 |
| Ich habe leichte Probleme, meinen alltäglichen Tätigkeiten nachzugehen | 2 |
| Ich habe mäßige Probleme, meinen alltäglichen Tätigkeiten nachzugehen  | 3 |
| Ich habe große Probleme, meinen alltäglichen Tätigkeiten nachzugehen   | 4 |
| Ich bin nicht in der Lage, meinen alltäglichen Tätigkeiten nachzugehen | 5 |

**5.4. Schmerzen/Körperliche Beschwerden**

|                                             |   |
|---------------------------------------------|---|
| Ich habe keine Schmerzen oder Beschwerden   | 1 |
| Ich habe leichte Schmerzen oder Beschwerden | 2 |
| Ich habe mäßige Schmerzen oder Beschwerden  | 3 |
| Ich habe starke Schmerzen oder Beschwerden  | 4 |
| Ich habe extreme Schmerzen oder Beschwerden | 5 |

**5.5. Angst/Niedergeschlagenheit**

|                                             |   |
|---------------------------------------------|---|
| Ich bin nicht ängstlich oder deprimiert     | 1 |
| Ich bin ein wenig ängstlich oder deprimiert | 2 |
| Ich bin mäßig ängstlich oder deprimiert     | 3 |
| Ich bin sehr ängstlich oder deprimiert      | 4 |
| Ich bin extrem ängstlich oder deprimiert    | 5 |

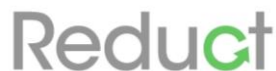

5.6. Um Sie bei der Einschätzung, wie gut oder wie schlecht Ihr Gesundheitszustand ist, zu unterstützen, haben wir eine Skala gezeichnet, ähnlich einem Thermometer. Der best denkbare Gesundheitszustand ist mit einer "100" gekennzeichnet, der schlechteste mit "0".

Wir möchten Sie nun bitten, auf dieser Skala zu kennzeichnen, wie gut oder schlecht Ihrer Ansicht nach Ihr persönlicher Gesundheitszustand heute ist. Bitte verbinden Sie dazu den untenstehenden Kasten mit dem Punkt auf der Skala, der Ihren heutigen Gesundheitszustand am besten wiedergibt.

**Ihr heutiger  
Gesundheitszustand**

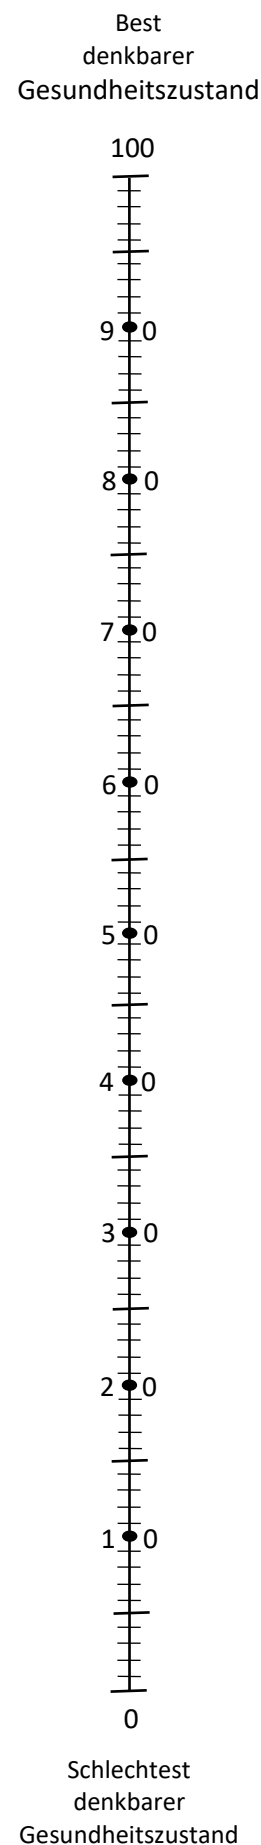

## 6. Achtsamkeit (FFA)

Dieser Fragebogen soll Ihre Achtsamkeit erfassen. Bitte beziehen Sie dabei die Aussagen auf die letzten 14 Tage. Kreuzen Sie bitte bei jeder Frage die Antwort an, die am besten auf Sie zutrifft.

|                                                                                                             | Fast<br>nie | Eher selten | Relativ<br>oft | Fast<br>immer |
|-------------------------------------------------------------------------------------------------------------|-------------|-------------|----------------|---------------|
| 6.1. Ich bin offen für die Erfahrung des Augenblicks.                                                       | 1           | 2           | 3              | 4             |
| 6.2. Ich spüre in meinen Körper hinein, sei es beim Essen, Kochen, Putzen, Reden.                           | 1           | 2           | 3              | 4             |
| 6.3. Wenn ich merke, dass ich abwesend war, kehre ich sanft zur Erfahrung des Augenblicks zurück.           | 1           | 2           | 3              | 4             |
| 6.4. Ich kann mich selbst wertschätzen.                                                                     | 1           | 2           | 3              | 4             |
| 6.5. Ich achte auf die Motive meiner Handlungen.                                                            | 1           | 2           | 3              | 4             |
| 6.6. Ich sehe meine Fehler und Schwierigkeiten, ohne mich zu verurteilen.                                   | 1           | 2           | 3              | 4             |
| 6.7. Ich bin in Kontakt mit meinen Erfahrungen, hier und jetzt.                                             | 1           | 2           | 3              | 4             |
| 6.8. Ich nehme unangenehme Erfahrungen an.                                                                  | 1           | 2           | 3              | 4             |
| 6.9. Ich bin mir selbst gegenüber freundlich, wenn Dinge schief laufen.                                     | 1           | 2           | 3              | 4             |
| 6.10. Ich beobachte meine Gefühle, ohne mich in ihnen zu verlieren.                                         | 1           | 2           | 3              | 4             |
| 6.11. In schwierigen Situationen kann ich innehalten.                                                       | 1           | 2           | 3              | 4             |
| 6.12. Ich erlebe Momente innerer Ruhe und Gelassenheit, selbst wenn äußerlich Schmerzen und Unruhe da sind. | 1           | 2           | 3              | 4             |
| 6.13. Ich bin ungeduldig mit mir und meinen Mitmenschen.                                                    | 4           | 3           | 2              | 1             |

1  
2  
3  
4  
5  
6  
7  
8  
9  
10  
11  
12  
13  
14  
15  
16  
17  
18  
19  
20  
21  
22  
23  
24  
25  
26  
27  
28  
29  
30  
31  
32  
33  
34  
35  
36  
37  
38  
39  
40  
41  
42  
43  
44  
45  
46  
47  
48  
49  
50  
51  
52  
53  
54  
55  
56  
57  
58  
59  
60

# Reduct

15

6.14. Ich kann darüber lächeln, wenn  
ich sehe, wie ich mir manchmal das  
Leben schwer mache.

1

2

3

4

For peer review only

**7. Wie oft fühlten Sie sich im Verlauf der letzten 2 Wochen durch die folgenden Beschwerden beeinträchtigt? (PHQ-4)**

|                                                                      | <b>Überhaupt nicht</b> | <b>An einzelnen Tagen</b> | <b>An mehr als der Hälfte der Tage</b> | <b>Beinahe jeden Tag</b> |
|----------------------------------------------------------------------|------------------------|---------------------------|----------------------------------------|--------------------------|
| 7.1. Wenig Interesse oder Freude an Ihren Tätigkeiten                | 0                      | 1                         | 2                                      | 3                        |
| 7.2. Niedergeschlagenheit, Schwermut oder Hoffnungslosigkeit         | 0                      | 1                         | 2                                      | 3                        |
| 7.3. Nervosität, Ängstlichkeit oder Anspannung                       | 0                      | 1                         | 2                                      | 3                        |
| 7.4. Nicht in der Lage sein, Sorgen zu stoppen oder zu kontrollieren | 0                      | 1                         | 2                                      | 3                        |



## 8. Skills

Kreuzen Sie bitte bei jeder Frage die Antwort an, die am besten auf Sie zutrifft.

|                                                                                                                      | Stimmt<br>überhaupt<br>nicht |   | Neutral |   | Stimmt<br>voll-<br>kommen |
|----------------------------------------------------------------------------------------------------------------------|------------------------------|---|---------|---|---------------------------|
| <b>8.1. In belastenden Situationen kann ich mich aufmuntern, indem ich meine Gedanken auf positive Dinge richte.</b> | 1                            | 2 | 3       | 4 | 5                         |
| <b>8.2. Meine Gedanken geben mir im Umgang mit stressigen Situationen Kraft.</b>                                     | 1                            | 2 | 3       | 4 | 5                         |
| <b>8.3. Wenn ich belastende Gefühle verspüre, lasse ich sie zu.</b>                                                  | 1                            | 2 | 3       | 4 | 5                         |
| <b>8.4. Ich kann Dinge annehmen, die ich nicht ändern kann.</b>                                                      | 1                            | 2 | 3       | 4 | 5                         |
| <b>8.5. Ich überlege mir, was ich im Umgang mit der Krebserkrankung tun kann.</b>                                    | 1                            | 2 | 3       | 4 | 5                         |
| <b>8.6. Ich führe oft bestimmte Aktivitäten aus, um auf andere Gedanken zu kommen.</b>                               | 1                            | 2 | 3       | 4 | 5                         |
| <b>8.7. Ich kann mir wohlwollend begegnen.</b>                                                                       | 1                            | 2 | 3       | 4 | 5                         |
| <b>8.8. Ich kann gut für mich sorgen.</b>                                                                            | 1                            | 2 | 3       | 4 | 5                         |
| <b>8.9. Ich suche Kontakt zu liebevollen Menschen.</b>                                                               | 1                            | 2 | 3       | 4 | 5                         |

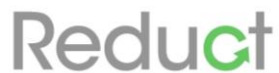

**8.10. Ich kann nach  
Unterstützung suchen.**

**1**

**2**

**3**

**4**

**5**

For peer review only

1  
2  
3  
4  
5  
6  
7  
8  
9  
10  
11  
12  
13  
14  
15  
16  
17  
18  
19  
20  
21  
22  
23  
24  
25  
26  
27  
28  
29  
30  
31  
32  
33  
34  
35  
36  
37  
38  
39  
40  
41  
42  
43  
44  
45  
46  
47  
48  
49  
50  
51  
52  
53  
54  
55  
56  
57  
58  
59  
60

### III. Technikakzeptanz nach UTAUT

1. Nun stellen wir Ihnen einige Eigenschaften digitaler Gesundheitsangebote (wie das Make It Training) vor. Bitte geben Sie für jede Eigenschaft an, wie ausschlaggebend sie dafür ist, dass Sie ein digitales Gesundheitsangebot nutzen.

|                                                                                                               | Stimmt<br>überhaupt<br>nicht | 1 | 2 | Neutral | 3 | 4 | Stimmt<br>voll-<br>kommen | 5 |
|---------------------------------------------------------------------------------------------------------------|------------------------------|---|---|---------|---|---|---------------------------|---|
| 8.1. In belastenden Situationen kann ich mich aufmuntern, indem ich meine Gedanken auf positive Dinge richte. | 1                            | 2 | 3 | 4       | 5 |   |                           |   |
| 8.2. Meine Gedanken geben mir im Umgang mit stressigen Situationen Kraft.                                     | 1                            | 2 | 3 | 4       | 5 |   |                           |   |
| 8.3. Wenn ich belastende Gefühle verspüre, lasse ich sie zu.                                                  | 1                            | 2 | 3 | 4       | 5 |   |                           |   |
| 8.4. Ich kann Dinge annehmen, die ich nicht ändern kann.                                                      | 1                            | 2 | 3 | 4       | 5 |   |                           |   |
| 8.5. Ich überlege mir, was ich im Umgang mit der Krebserkrankung tun kann.                                    | 1                            | 2 | 3 | 4       | 5 |   |                           |   |
| 8.6. Ich werde oft aktiv, um auf andere Gedanken zu kommen.                                                   | 1                            | 2 | 3 | 4       | 5 |   |                           |   |
| 8.7. Ich kann mir wohlwollend begegnen.                                                                       | 1                            | 2 | 3 | 4       | 5 |   |                           |   |
| 8.8. Ich kann gut für mich sorgen.                                                                            | 1                            | 2 | 3 | 4       | 5 |   |                           |   |
| 8.9. Ich suche Kontakt zu liebevollen Menschen.                                                               | 1                            | 2 | 3 | 4       | 5 |   |                           |   |
| 8.10. Ich kann nach Unterstützung suchen.                                                                     | 1                            | 2 | 3 | 4       | 5 |   |                           |   |

| Von einem digitalen Gesundheitsangebot erwarte ich, dass ...                                                             | <b>Stimme gar nicht zu</b> | <b>Stimme nicht zu</b> | <b>Stimme weder zu noch lehne ich ab</b> | <b>Stimme zu</b> | <b>Stimme voll und ganz zu</b> |
|--------------------------------------------------------------------------------------------------------------------------|----------------------------|------------------------|------------------------------------------|------------------|--------------------------------|
| 1.1. ich es jederzeit nutzen kann.                                                                                       | 1                          | 2                      | 3                                        | 4                | 5                              |
| 1.2. ich es auf verschiedenen Endgeräten nutzen kann (u.a. Handy, Laptop, Tablet).                                       | 1                          | 2                      | 3                                        | 4                | 5                              |
| 1.3. es einfach zu bedienen ist.                                                                                         | 1                          | 2                      | 3                                        | 4                | 5                              |
| 1.4. das Design ansprechend gestaltet und übersichtlich dargestellt ist.                                                 | 1                          | 2                      | 3                                        | 4                | 5                              |
| 1.5. das Angebot so gestaltet ist, dass es mich bei auftretenden Problemen unterstützt und ich diese alleine lösen kann. | 1                          | 2                      | 3                                        | 4                | 5                              |

2. Die Nutzung eines digitalen Gesundheitsangebots ist immer mit einem gewissen Aufwand verbunden. Bitte beantworten Sie im Folgenden, inwieweit Sie den verschiedenen Aussagen zustimmen.

| Um ein Gesundheitsangebot nutzen zu können, bin ich prinzipiell bereit, ...   | Stimme gar nicht zu | Stimme eher nicht zu | Stimme weder zu noch lehne ich ab | Stimme teilweise zu | Stimme voll und ganz zu |
|-------------------------------------------------------------------------------|---------------------|----------------------|-----------------------------------|---------------------|-------------------------|
| 2.1. zusätzliche Software auf mein Mobiltelefon/Computer/Tablet/... zu laden. | 1                   | 2                    | 3                                 | 4                   | 5                       |
| 2.2. mich regelmäßig mit den Aufgaben auseinanderzusetzen.                    | 1                   | 2                    | 3                                 | 4                   | 5                       |
| 2.3. Einheiten in die Freizeit mit einzuplanen.                               | 1                   | 2                    | 3                                 | 4                   | 5                       |

3. Bitte geben Sie an, inwieweit Sie den verschiedenen Aussagen zustimmen.

| Meiner Meinung nach, ...                                                                                                               | Stimme gar nicht zu | Stimme eher nicht zu | Stimme weder zu noch lehne ich ab | Stimme teilweise zu | Stimme voll und ganz zu |
|----------------------------------------------------------------------------------------------------------------------------------------|---------------------|----------------------|-----------------------------------|---------------------|-------------------------|
| 3.1. kann die Nutzung eines digitalen Gesundheitsangebots <u>negative</u> Auswirkungen auf die Meinung meines Umfelds über mich haben. | 1                   | 2                    | 3                                 | 4                   | 5                       |
| 3.2. benötigt die Nutzung eines digitalen Gesundheitsangebots viel Zeit.                                                               | 1                   | 2                    | 3                                 | 4                   | 5                       |

3.3. besteht das Risiko, dass die persönliche Interaktion zwischen der Ärztin/ dem Arzt und der Patientin/dem Patienten schwindet.

|   |   |   |   |   |
|---|---|---|---|---|
| 1 | 2 | 3 | 4 | 5 |
|---|---|---|---|---|

3.4. besteht das Risiko, dass ich mich während der Nutzung des digitalen Gesundheitsangebots "allein" gelassen fühle.

|   |   |   |   |   |
|---|---|---|---|---|
| 1 | 2 | 3 | 4 | 5 |
|---|---|---|---|---|

**4. Informationen über digitale Gesundheitsangebote können über persönliche Kontakte oder auch Medien verbreitet werden. Bitte geben Sie an, inwieweit Sie den folgenden Aussagen zustimmen.**

|                                                                                                                                                                                           | Stimme<br>gar nicht<br>zu | Stimme<br>eher nicht<br>zu | Stimme<br>weder zu<br>noch<br>lehne ich<br>ab | Stimme<br>teilweise<br>zu | Stimme<br>voll und<br>ganz zu |
|-------------------------------------------------------------------------------------------------------------------------------------------------------------------------------------------|---------------------------|----------------------------|-----------------------------------------------|---------------------------|-------------------------------|
| 4.1. In den Medien sind Beiträge zu finden, die positiv über digitale Gesundheitsangebote zur Unterstützung im Umgang mit krankheitsbezogenen Belastungen berichten.                      | 1                         | 2                          | 3                                             | 4                         | 5                             |
| 4.2. Die Mehrheit meiner Freunde und Arbeitskollegen beurteilen die Verwendung digitaler Gesundheitsangebote zur Unterstützung im Umgang mit krankheitsbezogenen Belastungen als positiv. | 1                         | 2                          | 3                                             | 4                         | 5                             |

4.3. Personen, die mir wichtig sind, halten es für eine gute Idee, ein digitales Gesundheitsangebot zur Unterstützung im Umgang mit krankheitsbezogenen Belastungen zu nutzen.

1                      2                      3                      4                      5

4.4. Einige meiner Freunde/Bekanntes haben mir empfohlen, ein digitales Gesundheitsangebot zur Unterstützung im Umgang mit krankheitsbezogenen Belastungen auszuprobieren.

1                      2                      3                      4                      5

## V. Nutzung von Technologien

1. Wie häufig nutzen Sie die folgenden Technologien privat?

|                    | nie/besitze<br>ich nicht | eher<br>weniger (als<br>1x/Woche) | mäßig<br>(mehr als<br>1x/Woche) | oft (täglich) | Sehr oft<br>(mehrmals<br>täglich) |
|--------------------|--------------------------|-----------------------------------|---------------------------------|---------------|-----------------------------------|
| <u>PC/Laptop:</u>  | 1                        | 2                                 | 3                               | 4             | 5                                 |
| <u>Tablet:</u>     | 1                        | 2                                 | 3                               | 4             | 5                                 |
| <u>Smartphone:</u> | 1                        | 2                                 | 3                               | 4             | 5                                 |

2. Bitte geben Sie an, wie lange am Tag Sie ca. digitale Medien (wie digitales Fernsehen, eBooks, Computer, Smartphone) nutzen.

- 0-1 Stunde   
  1-2 Stunden   
  2-3 Stunden   
  3-4 Stunden   
  Mehr als 4 Stunden

3. Bitte geben Sie im Folgenden an, inwieweit Sie den verschiedenen Aussagen zustimmen.

|                                                        | Stimme gar<br>nicht zu | Stimme nicht<br>zu | Stimme weder zu<br>noch lehne<br>ich ab | Stimme zu | Stimme voll<br>und ganz zu |
|--------------------------------------------------------|------------------------|--------------------|-----------------------------------------|-----------|----------------------------|
| 5.3.1. Ich kann gut mit digitalen Medien umgehen.      | 1                      | 2                  | 3                                       | 4         | 5                          |
| 5.3.2. Ich bin offen für verschiedene digitale Medien. | 1                      | 2                  | 3                                       | 4         | 5                          |



5.3.3. Ich habe  
Erfahrung mit  
digitalen  
Gesundheitsa  
ngeboten im  
Umgang mit  
krankheitsbez  
ogenen  
Belastungen.

1 2 3 4 5

For peer review only

**VI. Inwieweit sind die folgenden Themen für den Umgang mit Ihrer Krebserkrankung für Sie wichtig?**

|                                | Überhaupt<br>nicht wichtig | Wenig<br>wichtig         | Mäßig<br>wichtig         | Eher<br>wichtig          | Sehr wichtig             |
|--------------------------------|----------------------------|--------------------------|--------------------------|--------------------------|--------------------------|
| Gesundheitsbezogenes Verhalten | 1                          | 2                        | 3                        | 4                        | 5                        |
| Gefühle                        | 1                          | 2                        | 3                        | 4                        | 5                        |
| Kreativität                    | 1                          | 2                        | 3                        | 4                        | 5                        |
| Schmerzerleben                 | 1                          | 2                        | 3                        | 4                        | 5                        |
| Angst                          | 1                          | 2                        | 3                        | 4                        | 5                        |
| Kraftquellen                   | 1                          | 2                        | 3                        | 4                        | 5                        |
| Positivität                    | 1                          | 2                        | 3                        | 4                        | 5                        |
| Körpergefühl                   | 1                          | 2                        | 3                        | 4                        | 5                        |
| Bewegung und Entspannung       | 1                          | 2                        | 3                        | 4                        | 5                        |
| Stressmanagement               | <input type="checkbox"/>   | <input type="checkbox"/> | <input type="checkbox"/> | <input type="checkbox"/> | <input type="checkbox"/> |
| Schlaf                         | <input type="checkbox"/>   | <input type="checkbox"/> | <input type="checkbox"/> | <input type="checkbox"/> | <input type="checkbox"/> |
| Selbstzuwendung                | <input type="checkbox"/>   | <input type="checkbox"/> | <input type="checkbox"/> | <input type="checkbox"/> | <input type="checkbox"/> |
| Beziehungen                    | <input type="checkbox"/>   | <input type="checkbox"/> | <input type="checkbox"/> | <input type="checkbox"/> | <input type="checkbox"/> |



27

Liebe Teilnehmerin, lieber Teilnehmer,

Vielen Dank für Ihre Teilnahme an der ersten Befragung der Reduct Studie. Für die nächsten Schritte wird sich das Reduct Team in den nächsten Tagen bei Ihnen melden.

Sollten Sie Fragen haben, können Sie gerne jederzeit eine E-Mail an [reduct@uni-due.de](mailto:reduct@uni-due.de) senden.

Wir wünschen Ihnen alles Gute!

Ihr Reduct Team

For peer review only

Teilnehmer-ID: \_\_\_\_\_

# Reduct- Web-Basierte Achtsamkeits- und Skillsbasierte Stressreduktion für Patientinnen und Patienten mit Krebs

Liebe Teilnehmerin, lieber Teilnehmer,

wir hoffen, dass Ihnen die Reduct-Web-App gefallen hat und dass Sie die Inhalte als hilfreich im Umgang mit Belastungen erlebt haben. Die Informationen und Übungen, die Sie gesammelt haben, stehen Ihnen aber weiterhin zur Verfügung. Somit können Sie diese auch zukünftig zum Üben ihrer Skills nutzen und somit nachhaltig und langfristig vom Training profitieren.

Zum Abschluss des Trainings möchten wir Sie bitten, erneut einen Fragebogen auszufüllen. Dieser wird ca. 15 - 20 Minuten Ihrer Zeit in Anspruch nehmen. Wir möchten gerne erfahren, wie Sie die Inhalte der Reduct-Web-App sowie die technische Umsetzung erlebt haben. Diese Informationen helfen uns dabei, das Training zu verbessern und vielen Patienten zur Verfügung zu stellen.

Sollten Sie Fragen haben, können Sie gerne jederzeit eine E-Mail an [reduct@uni-due.de](mailto:reduct@uni-due.de) senden.

Wenn Sie merken, dass Sie sich sehr belastet fühlen und Sie mehr Unterstützung bei der Bewältigung Ihrer Erkrankung benötigen, können Sie sich jederzeit an die/den Studienverantwortliche/n Ihres Zentrums wenden. Diese/r kann Ihnen bei der Suche psychoonkologischer Hilfsangebote zur Seite stehen.

Vielen Dank für Ihre Teilnahme und Unterstützung!

Ihr Reduct Team

[\\*Kontaktdaten](#)

[2]

## I. Fragen zu Ihrem derzeitigen Befinden

### 1. Angst und Stresserleben

Bitte beantworten Sie im Folgenden, wie sehr die jeweilige Aussage in der letzten Woche auf Sie zutraf.

- |                                                                                           |                                                                     |
|-------------------------------------------------------------------------------------------|---------------------------------------------------------------------|
| 1.1. Ich fühle mich angespannt oder überreizt.                                            | 1.2. Ich fühle mich in meinen Aktivitäten gebremst.                 |
| 3 meistens                                                                                | 3 fast immer                                                        |
| 2 oft                                                                                     | 2 sehr oft                                                          |
| 1 von Zeit zu Zeit/ gelegentlich                                                          | 1 manchmal                                                          |
| 0 überhaupt nicht                                                                         | 0 überhaupt nicht                                                   |
| 1.3. Ich kann mich heute noch so freuen wie früher.                                       | 1.4. Ich habe manchmal ein ängstliches Gefühl in der Magengegend.   |
| 0 ganz genau so                                                                           | 0 überhaupt nicht                                                   |
| 1 nicht ganz so sehr                                                                      | 1 gelegentlich                                                      |
| 2 Nur noch ein wenig                                                                      | 2 ziemlich oft                                                      |
| 3 kaum oder gar nicht                                                                     | 3 sehr oft                                                          |
| 1.5. Mich überkommt eine ängstliche Vorahnung, dass etwas Schreckliches passieren könnte. | 1.6. Ich habe das Interesse an meiner äußeren Erscheinung verloren. |
| 3 ja, sehr stark                                                                          | 3 ja, stimmt genau                                                  |
| 2 ja, aber nicht allzu stark                                                              | 2 ich kümmere mich nicht so sehr darum, wie ich sollte              |
| 1 etwas, aber es macht mir keine Sorgen                                                   | 1 möglicherweise kümmere ich mich zu wenig darum                    |
| 0 überhaupt nicht                                                                         | 0 ich kümmere mich so viel darum wie immer                          |

1  
2  
3  
4  
5  
6  
7  
8  
9  
10  
11  
12  
13  
14  
15  
16  
17  
18  
19  
20  
21  
22  
23  
24  
25  
26  
27  
28  
29  
30  
31  
32  
33  
34  
35  
36  
37  
38  
39  
40  
41  
42  
43  
44  
45  
46  
47  
48  
49  
50  
51  
52  
53  
54  
55  
56  
57  
58  
59  
60

1.7. Ich kann lachen und die lustige Seite der Dinge sehen.

- 0 ja, so viel wie immer
- 1 nicht mehr ganz so viel
- 2 inzwischen viel weniger
- 3 überhaupt nicht

1.8. Ich fühle mich rastlos, muss immer in Bewegung sein.

- 3 ja, tatsächlich sehr
- 2 ziemlich
- 1 nicht sehr
- 0 überhaupt nicht

1.9. Mir gehen beunruhigende Gedanken durch den Kopf.

- 3 einen Großteil der Zeit
- 2 verhältnismäßig oft
- 1 von Zeit zu Zeit, aber nicht allzu oft
- 0 nur gelegentlich/nie

1.10. Ich blicke mit Freude in die Zukunft.

- 0 ja, sehr
- 1 eher weniger als früher
- 2 viel weniger als früher
- 3 kaum bis gar nicht

1.11. Ich fühle mich glücklich.

- 3 überhaupt nicht
- 2 selten
- 1 manchmal
- 0 meistens

1.12. Mich überkommt plötzlich ein panikartiger Zustand.

- 3 ja, tatsächlich sehr oft
- 2 ziemlich oft
- 1 nicht sehr oft
- 0 überhaupt nicht

1.13. Ich kann behaglich dasitzen und mich entspannen.

- 0 ja, natürlich
- 1 gewöhnlich schon
- 2 nicht oft
- 3 überhaupt nicht

1.14. Ich kann mich an einem guten Buch, einer Radio- oder Fernsehsendung erfreuen.

- 0 oft
- 1 manchmal
- 2 Eher selten
- 3 Sehr selten

## 2. Belastungsthermometer

Bitte markieren Sie am Thermometer die Zahl, die am besten beschreibt, wie belastet Sie sich in der letzten Woche einschließlich heute gefühlt haben.



For review only

### 3. Skala zur Allgemeinen Selbstwirksamkeitserwartung

Kreuzen Sie bitte bei jeder Frage die Antwort an, die am besten auf Sie zutrifft.

|                                                                                                    | Stimmt<br>nicht | Stimmt<br>kaum | Stimmt<br>eher | Stimmt<br>genau |
|----------------------------------------------------------------------------------------------------|-----------------|----------------|----------------|-----------------|
| 3.1. Wenn sich Widerstände auftun, finde ich Mittel und Wege, mich durchzusetzen.                  | 1               | 2              | 3              | 4               |
| 3.2. Die Lösung schwieriger Probleme gelingt mir immer, wenn ich mich darum bemühe.                | 1               | 2              | 3              | 4               |
| 3.3. Es bereitet mir keine Schwierigkeiten, meine Absichten und Ziele zu verwirklichen.            | 1               | 2              | 3              | 4               |
| 3.4. In unerwarteten Situationen weiß ich immer, wie ich mich verhalten soll.                      | 1               | 2              | 3              | 4               |
| 3.5. Auch bei überraschenden Ereignissen glaube ich, dass ich gut mit ihnen zurechtkommen kann.    | 1               | 2              | 3              | 4               |
| 3.6. Schwierigkeiten sehe ich gelassen entgegen, weil ich meinen Fähigkeiten immer vertrauen kann. | 1               | 2              | 3              | 4               |
| 3.7. Was auch immer passiert, ich werde schon klarkommen.                                          | 1               | 2              | 3              | 4               |
| 3.8. Für jedes Problem kann ich eine Lösung finden.                                                | 1               | 2              | 3              | 4               |
| 3.9. Wenn eine neue Sache auf mich zukommt, weiß ich, wie ich damit umgehen kann.                  | 1               | 2              | 3              | 4               |
| 3.10. Wenn ein Problem auftaucht, kann ich es aus eigener Kraft meistern.                          | 1               | 2              | 3              | 4               |



#### 4. Lebensqualität (EORT-QLQ-C30)

Bitte kreuzen Sie im Folgenden Abschnitt die Zahl von 1 bis 4 an, die am besten auf Sie zutrifft.

|                                                                                                                                      | Überhaupt<br>nicht | Wenig | Mäßig | Sehr |
|--------------------------------------------------------------------------------------------------------------------------------------|--------------------|-------|-------|------|
| 4.1. Bereitet es Ihnen Schwierigkeiten, sich körperlich anzustrengen (z.B. eine schwere Einkaufstasche oder einen Koffer zu tragen)? | 1                  | 2     | 3     | 4    |
| 4.2. Bereitet es Ihnen Schwierigkeiten, einen <u>längeren</u> Spaziergang zu machen?                                                 | 1                  | 2     | 3     | 4    |
| 4.3. Bereitet es Ihnen Schwierigkeiten, eine <u>kurze</u> Strecke außer Haus zu gehen?                                               | 1                  | 2     | 3     | 4    |
| 4.4. Müssen Sie tagsüber im Bett liegen oder in einem Sessel sitzen?                                                                 | 1                  | 2     | 3     | 4    |
| 4.5. Brauchen Sie Hilfe beim Essen, Anziehen, Waschen oder Benutzen der Toilette?                                                    | 1                  | 2     | 3     | 4    |
| <b>Während der letzten Woche:</b>                                                                                                    |                    |       |       |      |
|                                                                                                                                      | Überhaupt<br>nicht | Wenig | Mäßig | Sehr |
| 4.6. Waren Sie bei Ihrer Arbeit oder bei anderen tagtäglichen Beschäftigungen eingeschränkt?                                         | 1                  | 2     | 3     | 4    |
| 4.7. Waren Sie bei Ihren Hobbys oder andere Freizeitbeschäftigungen eingeschränkt?                                                   | 1                  | 2     | 3     | 4    |
| 4.8. Waren Sie kurzatmig?                                                                                                            | 1                  | 2     | 3     | 4    |
| 4.9. Hatten Sie Schmerzen?                                                                                                           | 1                  | 2     | 3     | 4    |
| 4.10. Mussten Sie sich ausruhen?                                                                                                     | 1                  | 2     | 3     | 4    |
| 4.11. Hatten Sie Schlafstörungen?                                                                                                    | 1                  | 2     | 3     | 4    |

1  
2  
3 4.12. Fühlten Sie sich schwach?

4 1 2 3 4

5  
6  
7  
8 **Während der letzten Woche:**

**Überhaupt  
nicht**

**Wenig**

**Mäßig**

**Sehr**

9  
10  
11 4.13. Hatten Sie Appetitmangel?

12 1 2 3 4

13  
14 4.14. War Ihnen übel?

15 1 2 3 4

16  
17 4.15. Haben Sie erbrochen?

18 1 2 3 4

19  
20 4.16. Hatten Sie Verstopfung?

21 1 2 3 4

22  
23 4.17. Hatten Sie Durchfall?

24 1 2 3 4

25  
26 4.18. Waren Sie müde?

27 1 2 3 4

28  
29 4.19. Fühlten Sie sich durch  
30 Schmerzen in Ihrem alltäglichen  
31 Leben beeinträchtigt?

32 1 2 3 4

33  
34 4.20. Hatten Sie Schwierigkeiten, sich  
35 auf etwas zu konzentrieren, z.B. auf  
36 das Zeitungslesen oder das  
37 Fernsehen?

38 1 2 3 4

39  
40 4.21. Fühlten Sie sich angespannt?

41 1 2 3 4

42  
43 4.22. Haben Sie sich Sorgen  
44 gemacht?

45 1 2 3 4

46  
47 4.23. Waren Sie reizbar?

48 1 2 3 4

49  
50 4.24. Fühlten Sie sich  
niedergeschlagen?

51 1 2 3 4

52  
53 4.25. Hatten Sie Schwierigkeiten, sich  
an Dinge zu erinnern?

54 1 2 3 4

55  
56 4.26. Hat Ihr körperlicher Zustand  
oder Ihre medizinische Behandlung  
57 Ihr Familienleben beeinträchtigt?

58 1 2 3 4

1  
2  
3 4.27. Hat Ihr körperlicher Zustand 1 2 3 4  
4 oder Ihre medizinische Behandlung  
5 Ihr Zusammensein oder Ihre  
6 gemeinsamen Unternehmungen mit  
7 anderen Menschen beeinträchtigt?  
8

9  
10  
11 4.28. Hat Ihr körperlicher Zustand 1 2 3 4  
12 oder Ihre medizinische Behandlung  
13 für Sie finanzielle Schwierigkeiten mit  
14 sich gebracht?  
15

16 **Bitte kreuzen Sie bei den folgenden Fragen die Zahl zwischen 1 und 7 an, die am besten auf Sie**  
17 **zutrifft.**

18  
19  
20 4.29. Wie würden Sie insgesamt Ihren Gesundheitszustand während der letzten Woche  
21 einschätzen?  
22

23 1 2 3 4 5 6 7  
24  
25 sehr ausgezeichnet  
26 schlecht

27  
28 4.30. Wie würden Sie insgesamt Ihre Lebensqualität während der letzten Woche einschätzen?  
29

30 1 2 3 4 5 6 7  
31  
32 sehr ausgezeichnet  
33 schlecht  
34  
35  
36  
37  
38  
39  
40  
41  
42  
43  
44  
45  
46  
47  
48  
49  
50  
51  
52  
53  
54  
55  
56  
57  
58  
59  
60

1  
2  
3  
4  
5  
6  
7  
8 **5. Lebensqualität (EQ-5D-5L)**

9 **Bitte kreuzen Sie unter jeder Überschrift das Kästchen an, das Ihren Gesundheitszustand heute am**  
10 **besten beschreibt.**

11 **besten beschreibt.**

12  
13  
14  
15 **5.1. Beweglichkeit/Mobilität**

16  
17 Ich habe keine Probleme herumzugehen 1

18 Ich habe leichte Probleme herumzugehen 2

19 Ich habe mäßige Probleme herumzugehen 3

20 Ich habe große Probleme herumzugehen 4

21 Ich bin nicht in der Lage, herumzugehen 5

22  
23  
24  
25  
26  
27  
28  
29 **5.2. Für sich selbst sorgen**

30 Ich habe keine Probleme, mich selbst zu waschen oder anzuziehen 1

31 Ich habe leichte Probleme, mich selbst zu waschen oder anzuziehen 2

32 Ich habe mäßige Probleme, mich selbst zu waschen oder anzuziehen 3

33 Ich habe große Probleme, mich selbst zu waschen oder anzuziehen 4

34 Ich bin nicht in der Lage, mich selbst zu waschen oder anzuziehen 5

35  
36  
37  
38  
39  
40  
41  
42  
43 **5.3. Alltägliche Tätigkeiten** (z.B. Arbeit, Studium, Hausarbeit, Familien- oder Freizeitaktivitäten)

44 Ich habe keine Probleme, meinen alltäglichen Tätigkeiten nachzugehen 1

45 Ich habe leichte Probleme, meinen alltäglichen Tätigkeiten nachzugehen 2

46 Ich habe mäßige Probleme, meinen alltäglichen Tätigkeiten nachzugehen 3

47 Ich habe große Probleme, meinen alltäglichen Tätigkeiten nachzugehen 4

48 Ich bin nicht in der Lage, meinen alltäglichen Tätigkeiten nachzugehen 5

#### 5.4. Schmerzen/Körperliche Beschwerden

|                                             |   |
|---------------------------------------------|---|
| Ich habe keine Schmerzen oder Beschwerden   | 1 |
| Ich habe leichte Schmerzen oder Beschwerden | 2 |
| Ich habe mäßige Schmerzen oder Beschwerden  | 3 |
| Ich habe starke Schmerzen oder Beschwerden  | 4 |
| Ich habe extreme Schmerzen oder Beschwerden | 5 |

#### 5.5. Angst/Niedergeschlagenheit

|                                             |   |
|---------------------------------------------|---|
| Ich bin nicht ängstlich oder deprimiert     | 1 |
| Ich bin ein wenig ängstlich oder deprimiert | 2 |
| Ich bin mäßig ängstlich oder deprimiert     | 3 |
| Ich bin sehr ängstlich oder deprimiert      | 4 |
| Ich bin extrem ängstlich oder deprimiert    | 5 |

1  
2  
3  
4  
5  
6  
7  
8 **5.6. Um Sie bei der Einschätzung, wie gut oder wie schlecht Ihr**  
9 **Gesundheitszustand ist, zu unterstützen, haben wir eine Skala**  
10 **gezeichnet, ähnlich einem Thermometer. Der best denkbare**  
11 **Gesundheitszustand ist mit einer "100" gekennzeichnet, der**  
12 **schlechteste mit "0".**

13  
14 **Wir möchten Sie nun bitten, auf dieser Skala zu kennzeichnen,**  
15 **wie gut oder schlecht Ihrer Ansicht nach Ihr persönlicher**  
16 **Gesundheitszustand heute ist. Bitte verbinden Sie dazu den**  
17 **untenstehenden Kasten mit dem Punkt auf der Skala, der Ihren**  
18 **heutigen Gesundheitszustand am besten wiedergibt.**  
19  
20  
21  
22  
23  
24  
25  
26  
27  
28  
29  
30

31 **Ihr heutiger**  
32 **Gesundheitszustand**  
33  
34  
35  
36  
37  
38  
39  
40  
41  
42  
43  
44  
45  
46  
47  
48  
49  
50  
51  
52  
53  
54  
55  
56  
57  
58  
59  
60

Best  
denkbarer  
Gesundheitszustand

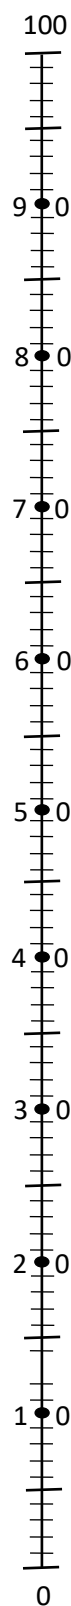

Schlechtest  
denkbarer  
Gesundheitszustand

**6. Achtsamkeit (FFA)**

Dieser Fragebogen soll Ihre Achtsamkeit erfassen. Bitte beziehen Sie dabei die Aussagen auf die letzten 14 Tage. Kreuzen Sie bitte bei jeder Frage die Antwort an, die am besten auf Sie zutrifft.

For peer review only

**7. Wie oft fühlten Sie sich im Verlauf der letzten 2 Wochen durch die folgenden Beschwerden beeinträchtigt? (PHQ-4)**

|                                                                                                             | <b>Fast nie</b> | <b>Eher selten</b> | <b>Relativ oft</b> | <b>Fast immer</b> |
|-------------------------------------------------------------------------------------------------------------|-----------------|--------------------|--------------------|-------------------|
| 6.1. Ich bin offen für die Erfahrung des Augenblicks.                                                       | 1               | 2                  | 3                  | 4                 |
| 6.2. Ich spüre in meinen Körper hinein, sei es beim Essen, Kochen, Putzen, Reden.                           | 1               | 2                  | 3                  | 4                 |
| 6.3. Wenn ich merke, dass ich abwesend war, kehre ich sanft zur Erfahrung des Augenblicks zurück.           | 1               | 2                  | 3                  | 4                 |
| 6.4. Ich kann mich selbst wertschätzen.                                                                     | 1               | 2                  | 3                  | 4                 |
| 6.5. Ich achte auf die Motive meiner Handlungen.                                                            | 1               | 2                  | 3                  | 4                 |
| 6.6. Ich sehe meine Fehler und Schwierigkeiten, ohne mich zu verurteilen.                                   | 1               | 2                  | 3                  | 4                 |
| 6.7. Ich bin in Kontakt mit meinen Erfahrungen, hier und jetzt.                                             | 1               | 2                  | 3                  | 4                 |
| 6.8. Ich nehme unangenehme Erfahrungen an.                                                                  | 1               | 2                  | 3                  | 4                 |
| 6.9. Ich bin mir selbst gegenüber freundlich, wenn Dinge schief laufen.                                     | 1               | 2                  | 3                  | 4                 |
| 6.10. Ich beobachte meine Gefühle, ohne mich in ihnen zu verlieren.                                         | 1               | 2                  | 3                  | 4                 |
| 6.11. In schwierigen Situationen kann ich innehalten.                                                       | 1               | 2                  | 3                  | 4                 |
| 6.12. Ich erlebe Momente innerer Ruhe und Gelassenheit, selbst wenn äußerlich Schmerzen und Unruhe da sind. | 1               | 2                  | 3                  | 4                 |
| 6.13. Ich bin ungeduldig mit mir und meinen Mitmenschen.                                                    | 4               | 3                  | 2                  | 1                 |
| 6.14. Ich kann darüber lächeln, wenn ich sehe, wie ich mir manchmal das Leben schwer mache.                 | 1               | 2                  | 3                  | 4                 |



|                                                                      | Überhaupt<br>nicht | An einzelnen<br>Tagen | An mehr als<br>der Hälfte der<br>Tage | Beinahe<br>jeden Tag |
|----------------------------------------------------------------------|--------------------|-----------------------|---------------------------------------|----------------------|
| 7.1. Wenig Interesse oder Freude an Ihren Tätigkeiten                | 0                  | 1                     | 2                                     | 3                    |
| 7.2. Niedergeschlagenheit, Schwermut oder Hoffnungslosigkeit         | 0                  | 1                     | 2                                     | 3                    |
| 7.3. Nervosität, Ängstlichkeit oder Anspannung                       | 0                  | 1                     | 2                                     | 3                    |
| 7.4. Nicht in der Lage sein, Sorgen zu stoppen oder zu kontrollieren | 0                  | 1                     | 2                                     | 3                    |

## 8. Skills

Kreuzen Sie bitte bei jeder Frage die Antwort an, die am besten auf Sie zutrifft.

## II. Fragen zum Training

### 1. Patientenzufriedenheit (CSQ-1 adapted to Internet-based interventions)

Nun folgen Fragen dazu, wie zufrieden Sie mit dem Training/ der Reduct-Web-App waren.

|                                                                                                               | Stimmt<br>überhaupt<br>nicht | 1 | 2 | Neutral | 3 | 4 | Stimmt<br>voll-<br>kommen | 5 |
|---------------------------------------------------------------------------------------------------------------|------------------------------|---|---|---------|---|---|---------------------------|---|
| 8.1. In belastenden Situationen kann ich mich aufmuntern, indem ich meine Gedanken auf positive Dinge richte. | 1                            | 2 | 3 | 4       | 5 |   |                           |   |
| 8.2. Meine Gedanken geben mir im Umgang mit stressigen Situationen Kraft.                                     | 1                            | 2 | 3 | 4       | 5 |   |                           |   |
| 8.3. Wenn ich belastende Gefühle verspüre, lasse ich sie zu.                                                  | 1                            | 2 | 3 | 4       | 5 |   |                           |   |
| 8.4. Ich kann Dinge annehmen, die ich nicht ändern kann.                                                      | 1                            | 2 | 3 | 4       | 5 |   |                           |   |
| 8.5. Ich überlege mir, was ich im Umgang mit der Krebserkrankung tun kann.                                    | 1                            | 2 | 3 | 4       | 5 |   |                           |   |
| 8.6. Ich führe oft bestimmte Aktivitäten aus, um auf andere Gedanken zu kommen.                               | 1                            | 2 | 3 | 4       | 5 |   |                           |   |
| 8.7. Ich kann mir wohlwollend begegnen.                                                                       | 1                            | 2 | 3 | 4       | 5 |   |                           |   |
| 8.8. Ich kann gut für mich sorgen.                                                                            | 1                            | 2 | 3 | 4       | 5 |   |                           |   |
| 8.9. Ich suche Kontakt zu liebevollen Menschen.                                                               | 1                            | 2 | 3 | 4       | 5 |   |                           |   |
| 8.10. Ich kann nach Unterstützung suchen.                                                                     | 1                            | 2 | 3 | 4       | 5 |   |                           |   |

|                                                                                                                                  | Trifft<br>nicht zu       | Trifft<br>eher<br>nicht zu | Trifft<br>teilweise<br>zu | Trifft voll<br>und ganz<br>zu |
|----------------------------------------------------------------------------------------------------------------------------------|--------------------------|----------------------------|---------------------------|-------------------------------|
| 2.1. Das Training, an dem ich teilgenommen habe, hatte eine hohe Qualität                                                        | <input type="checkbox"/> | <input type="checkbox"/>   | <input type="checkbox"/>  | <input type="checkbox"/>      |
|                                                                                                                                  | 1                        | 2                          | 3                         | 4                             |
| 2.2. Ich habe die Art von Training erhalten, die ich wollte.                                                                     | <input type="checkbox"/> | <input type="checkbox"/>   | <input type="checkbox"/>  | <input type="checkbox"/>      |
|                                                                                                                                  | 1                        | 2                          | 3                         | 4                             |
| 2.3. Das Training hat meinen Bedürfnissen entsprochen.                                                                           | <input type="checkbox"/> | <input type="checkbox"/>   | <input type="checkbox"/>  | <input type="checkbox"/>      |
|                                                                                                                                  | 1                        | 2                          | 3                         | 4                             |
| 2.4. Ich würde einem Freund oder einer Freundin dieses Training empfehlen, wenn er oder sie eine ähnliche Hilfe benötigen würde. | <input type="checkbox"/> | <input type="checkbox"/>   | <input type="checkbox"/>  | <input type="checkbox"/>      |
|                                                                                                                                  | 1                        | 2                          | 3                         | 4                             |
| 2.5. Ich bin zufrieden mit dem Ausmaß der Hilfe, die ich durch das Training erhalten habe.                                       | <input type="checkbox"/> | <input type="checkbox"/>   | <input type="checkbox"/>  | <input type="checkbox"/>      |
|                                                                                                                                  | 1                        | 2                          | 3                         | 4                             |
| 2.6. Das Training hat mir dabei geholfen, angemessener mit meinen Problemen umzugehen.                                           | <input type="checkbox"/> | <input type="checkbox"/>   | <input type="checkbox"/>  | <input type="checkbox"/>      |
|                                                                                                                                  | 1                        | 2                          | 3                         | 4                             |
| 2.7. Im Großen und Ganzen bin ich mit dem Training zufrieden.                                                                    | <input type="checkbox"/> | <input type="checkbox"/>   | <input type="checkbox"/>  | <input type="checkbox"/>      |
|                                                                                                                                  | 1                        | 2                          | 3                         | 4                             |
| 2.8. Ich würde ein solches Training wieder nutzen, wenn ich Hilfe bräuchte.                                                      | <input type="checkbox"/> | <input type="checkbox"/>   | <input type="checkbox"/>  | <input type="checkbox"/>      |
|                                                                                                                                  | 1                        | 2                          | 3                         | 4                             |

## 2. Nutzbarkeit des Trainings (SUS)

2.1. Ich denke, dass ich das Programm (Reduct-Web-App) häufig benutzen würde.

| Stimme<br>überhaupt nicht zu |                          |                          |                          |                          | Stimme<br>voll zu        |
|------------------------------|--------------------------|--------------------------|--------------------------|--------------------------|--------------------------|
| 1                            | 2                        | 3                        | 4                        | 5                        |                          |
| <input type="checkbox"/>     | <input type="checkbox"/> | <input type="checkbox"/> | <input type="checkbox"/> | <input type="checkbox"/> | <input type="checkbox"/> |

2.2. Ich fand das Programm (Reduct-Web-App) unnötig komplex.

| Stimme<br>überhaupt nicht zu |                          |                          |                          |                          | Stimme<br>voll zu        |
|------------------------------|--------------------------|--------------------------|--------------------------|--------------------------|--------------------------|
| 1                            | 2                        | 3                        | 4                        | 5                        |                          |
| <input type="checkbox"/>     | <input type="checkbox"/> | <input type="checkbox"/> | <input type="checkbox"/> | <input type="checkbox"/> | <input type="checkbox"/> |

2.3 Ich fand das Programm (Reduct-Web-App) war einfach zu benutzen.

| Stimme<br>überhaupt nicht zu |                          |                          |                          |                          | Stimme<br>voll zu        |
|------------------------------|--------------------------|--------------------------|--------------------------|--------------------------|--------------------------|
| 1                            | 2                        | 3                        | 4                        | 5                        |                          |
| <input type="checkbox"/>     | <input type="checkbox"/> | <input type="checkbox"/> | <input type="checkbox"/> | <input type="checkbox"/> | <input type="checkbox"/> |

2.4 Ich denke, ich hätte die Hilfe einer technisch versierten Person benötigt, um das Programm (Reduct-Web-App) besser nutzen zu können.

| Stimme<br>überhaupt nicht zu |                          |                          |                          |                          | Stimme<br>voll zu        |
|------------------------------|--------------------------|--------------------------|--------------------------|--------------------------|--------------------------|
| 1                            | 2                        | 3                        | 4                        | 5                        |                          |
| <input type="checkbox"/>     | <input type="checkbox"/> | <input type="checkbox"/> | <input type="checkbox"/> | <input type="checkbox"/> | <input type="checkbox"/> |

2.5 Ich fand, die verschiedenen Funktionen in diesem Programm (Reduct-Web-App) griffen gut ineinander.

| Stimme<br>überhaupt nicht zu |                          |                          |                          |                          | Stimme<br>voll zu        |
|------------------------------|--------------------------|--------------------------|--------------------------|--------------------------|--------------------------|
| 1                            | 2                        | 3                        | 4                        | 5                        |                          |
| <input type="checkbox"/>     | <input type="checkbox"/> | <input type="checkbox"/> | <input type="checkbox"/> | <input type="checkbox"/> | <input type="checkbox"/> |

2.6 Ich denke, das Programm (Reduct-Web-App) enthielt zu viele Inkonsistenzen (Unstimmigkeiten).

| Stimme<br>überhaupt nicht zu |                                     |                          |                          |                          | Stimme<br>voll zu        |
|------------------------------|-------------------------------------|--------------------------|--------------------------|--------------------------|--------------------------|
| 1                            | 2                                   | 3                        | 4                        | 5                        |                          |
| <input type="checkbox"/>     | <input checked="" type="checkbox"/> | <input type="checkbox"/> | <input type="checkbox"/> | <input type="checkbox"/> | <input type="checkbox"/> |

2.7 Ich kann mir vorstellen, dass die meisten Menschen den Umgang mit diesem Programm (Reduct-Web-App) sehr schnell lernen können.

| Stimme überhaupt nicht zu |                          |                          |                          |                          | Stimme voll zu           |
|---------------------------|--------------------------|--------------------------|--------------------------|--------------------------|--------------------------|
| 1                         | 2                        | 3                        | 4                        | 5                        |                          |
| <input type="checkbox"/>  | <input type="checkbox"/> | <input type="checkbox"/> | <input type="checkbox"/> | <input type="checkbox"/> | <input type="checkbox"/> |

2.8 Ich fand das Programm (Reduct-Web-App) sehr umständlich zu benutzen.

| Stimme überhaupt nicht zu |                          |                          |                          |                          | Stimme voll zu           |
|---------------------------|--------------------------|--------------------------|--------------------------|--------------------------|--------------------------|
| 1                         | 2                        | 3                        | 4                        | 5                        |                          |
| <input type="checkbox"/>  | <input type="checkbox"/> | <input type="checkbox"/> | <input type="checkbox"/> | <input type="checkbox"/> | <input type="checkbox"/> |

2.9 Ich fühlte mich in der Benutzung des Programms (Reduct-Web-App) sehr sicher.

| Stimme überhaupt nicht zu |                          |                          |                          |                          | Stimme voll zu           |
|---------------------------|--------------------------|--------------------------|--------------------------|--------------------------|--------------------------|
| 1                         | 2                        | 3                        | 4                        | 5                        |                          |
| <input type="checkbox"/>  | <input type="checkbox"/> | <input type="checkbox"/> | <input type="checkbox"/> | <input type="checkbox"/> | <input type="checkbox"/> |

2.10 Ich musste eine Menge lernen, ehe ich anfangen konnte, das Programm (Reduct-Web-App) zu verwenden.

| Stimme überhaupt nicht zu |                          |                          |                          |                          | Stimme voll zu           |
|---------------------------|--------------------------|--------------------------|--------------------------|--------------------------|--------------------------|
| 1                         | 2                        | 3                        | 4                        | 5                        |                          |
| <input type="checkbox"/>  | <input type="checkbox"/> | <input type="checkbox"/> | <input type="checkbox"/> | <input type="checkbox"/> | <input type="checkbox"/> |

### 3. Bewertung von Gesundheitsanwendungen für das Smartphone (Survey for Rating Healthcare Smartphone Applications)

|                                                                                                                     | Gar nicht<br>zutreffend | Ein wenig<br>zutreffen | Großenteils<br>zutreffend | Immer<br>zutreffen |
|---------------------------------------------------------------------------------------------------------------------|-------------------------|------------------------|---------------------------|--------------------|
| 4.1. Die in der Reduct-Web-App bereitgestellten Informationen sind korrekt (es gibt keine ungenauen Informationen). | 1                       | 2                      | 3                         | 4                  |
| 4.2. In der Reduct-Web-App werden klare Informationen bereitgestellt.                                               | 1                       | 2                      | 3                         | 4                  |
| 4.3. Die Gesundheitsinformationen in dem Programm sind leicht verständlich.                                         | 1                       | 2                      | 3                         | 4                  |
| 4.4. Die in der Reduct-Web-App bereitgestellten Gesundheitsinformationen werden in Alltagssprache erklärt.          | 1                       | 2                      | 3                         | 4                  |
| 4.5. Die in der Reduct-Web-App bereitgestellten Informationen sind für Nutzer im Allgemeinen leicht zu lesen.       | 1                       | 2                      | 3                         | 4                  |
| 4.6. Es werden professionelle Gesundheitsinformationen zur Verfügung gestellt.                                      | 1                       | 2                      | 3                         | 4                  |
| 4.7. Gesundheitsinformationen werden systematisch vermittelt.                                                       | 1                       | 2                      | 3                         | 4                  |
| 4.8. Es ist ersichtlich, dass die Gesundheitsinformationen aus verlässlichen Quellen zitiert werden                 | 1                       | 2                      | 3                         | 4                  |
| 4.9. Die bereitgestellten Gesundheitsinformationen stammen von medizinischen Experten.                              | 1                       | 2                      | 3                         | 4                  |
| 4.10. Das Programm ist kohärent/einheitlich in Bezug auf Farbe, Konfiguration und Ausdrucksweise.                   | 1                       | 2                      | 3                         | 4                  |

|    |  |  |  |  |
|----|--|--|--|--|
| 1  |  |  |  |  |
| 2  |  |  |  |  |
| 3  |  |  |  |  |
| 4  |  |  |  |  |
| 5  |  |  |  |  |
| 6  |  |  |  |  |
| 7  |  |  |  |  |
| 8  |  |  |  |  |
| 9  |  |  |  |  |
| 10 |  |  |  |  |
| 11 |  |  |  |  |
| 12 |  |  |  |  |
| 13 |  |  |  |  |
| 14 |  |  |  |  |
| 15 |  |  |  |  |
| 16 |  |  |  |  |
| 17 |  |  |  |  |
| 18 |  |  |  |  |
| 19 |  |  |  |  |
| 20 |  |  |  |  |
| 21 |  |  |  |  |
| 22 |  |  |  |  |
| 23 |  |  |  |  |
| 24 |  |  |  |  |
| 25 |  |  |  |  |
| 26 |  |  |  |  |
| 27 |  |  |  |  |
| 28 |  |  |  |  |
| 29 |  |  |  |  |
| 30 |  |  |  |  |
| 31 |  |  |  |  |
| 32 |  |  |  |  |
| 33 |  |  |  |  |
| 34 |  |  |  |  |
| 35 |  |  |  |  |
| 36 |  |  |  |  |
| 37 |  |  |  |  |
| 38 |  |  |  |  |
| 39 |  |  |  |  |
| 40 |  |  |  |  |
| 41 |  |  |  |  |
| 42 |  |  |  |  |
| 43 |  |  |  |  |
| 44 |  |  |  |  |
| 45 |  |  |  |  |
| 46 |  |  |  |  |
| 47 |  |  |  |  |
| 48 |  |  |  |  |
| 49 |  |  |  |  |
| 50 |  |  |  |  |
| 51 |  |  |  |  |
| 52 |  |  |  |  |
| 53 |  |  |  |  |
| 54 |  |  |  |  |
| 55 |  |  |  |  |
| 56 |  |  |  |  |
| 57 |  |  |  |  |
| 58 |  |  |  |  |
| 59 |  |  |  |  |
| 60 |  |  |  |  |

1  
2  
3 4.21. Die Reduct-Web-App liefert  
4 Informationen zum Thema  
5 Datenschutz.

1                      2                      3                      4

6  
7  
8  
9  
10 4.22. Die Reduct-Web-App liefert  
11 Informationen über  
12 Sicherheitsrichtlinien in Bezug auf  
13 persönliche Gesundheitsinformationen.

1                      2                      3                      4

14  
15  
16  
17  
18 4.23. Die Reduct-Web-App erklärte das  
19 Sicherheitssystem zur Schaffung einer  
20 sicheren Umgebung für eine bessere  
21 Nutzung der mobilen App.

1                      2                      3                      4

#### 22 23 24 25 26 27 28 **4. Allgemeine Fragen**

##### 29 30 31 32 **4.1. Fanden Sie die visuelle Darstellung der Module in der Reduct-Web-App ansprechend?**

33  
34  
35  
36  
37                                                                                        

38  
39 1                      2                      3                      4                      5

40  
41 überhaupt nicht      eher weniger      mäßig      eher      sehr ansprechend  
42 ansprechend      ansprechend      ansprechend      ansprechend

##### 43 44 45 46 47 48 49 **4.2. Waren die Texte klar und verständlich?**

50  
51  
52                                                                                        

53  
54 1                      2                      3                      4                      5

55  
56 gar nicht      eher nicht      mäßig      eher verständlich      sehr verständlich  
57 verständlich      verständlich      verständlich



1  
2  
3  
4  
5  
6  
7  
8  
9  
10  
11  
12  
13  
14  
15  
16  
17  
18  
19  
20  
21  
22  
23  
24  
25  
26  
27  
28  
29  
30  
31  
32  
33  
34  
35  
36  
37  
38  
39  
40  
41  
42  
43  
44  
45  
46  
47  
48  
49  
50  
51  
52  
53  
54  
55  
56  
57  
58  
59  
60

#### 4.3 Fanden Sie die Videos ansprechend?

|                              |                          |                          |                          |                          |                              |
|------------------------------|--------------------------|--------------------------|--------------------------|--------------------------|------------------------------|
| <input type="checkbox"/>     | <input type="checkbox"/> | <input type="checkbox"/> | <input type="checkbox"/> | <input type="checkbox"/> | <input type="checkbox"/>     |
| 1                            | 2                        | 3                        | 4                        | 5                        | 6                            |
| überhaupt nicht<br>hilfreich | kaum hilfreich           | mäßig hilfreich          | eher hilfreich           | sehr hilfreich           | Kann ich nicht<br>beurteilen |

#### 4.4. Fanden Sie die Audio-Dateien ansprechend?

|                                |                             |                          |                          |                          |                              |
|--------------------------------|-----------------------------|--------------------------|--------------------------|--------------------------|------------------------------|
| <input type="checkbox"/>       | <input type="checkbox"/>    | <input type="checkbox"/> | <input type="checkbox"/> | <input type="checkbox"/> | <input type="checkbox"/>     |
| 1                              | 2                           | 3                        | 4                        | 5                        | 6                            |
| überhaupt nicht<br>ansprechend | eher weniger<br>ansprechend | mäßig<br>ansprechend     | eher<br>ansprechend      | sehr ansprechend         | Kann ich nicht<br>beurteilen |

#### 4.5. Fanden Sie die Belohnungen ansprechend?

|                                |                             |                          |                          |                          |                              |
|--------------------------------|-----------------------------|--------------------------|--------------------------|--------------------------|------------------------------|
| <input type="checkbox"/>       | <input type="checkbox"/>    | <input type="checkbox"/> | <input type="checkbox"/> | <input type="checkbox"/> | <input type="checkbox"/>     |
| 1                              | 2                           | 3                        | 4                        | 5                        | 6                            |
| überhaupt nicht<br>ansprechend | eher weniger<br>ansprechend | mäßig<br>ansprechend     | eher<br>ansprechend      | sehr ansprechend         | Kann ich nicht<br>beurteilen |

#### 4.6. Fanden Sie die Übungen hilfreich?

|                              |                          |                          |                          |                          |                              |
|------------------------------|--------------------------|--------------------------|--------------------------|--------------------------|------------------------------|
| <input type="checkbox"/>     | <input type="checkbox"/> | <input type="checkbox"/> | <input type="checkbox"/> | <input type="checkbox"/> | <input type="checkbox"/>     |
| 1                            | 2                        | 3                        | 4                        | 5                        | 6                            |
| überhaupt nicht<br>hilfreich | kaum hilfreich           | mäßig hilfreich          | eher hilfreich           | sehr hilfreich           | Kann ich nicht<br>beurteilen |

**4.7. Sind Sie mit der Plattform „Reduct-Web-App“ zufrieden?**

|                          |                          |                          |                          |                          |
|--------------------------|--------------------------|--------------------------|--------------------------|--------------------------|
| <input type="checkbox"/> |
| 1                        | 2                        | 3                        | 4                        | 5                        |

überhaupt nicht zufrieden      Kaum zufrieden      mäßig zufrieden      Eher zufrieden      Sehr zufrieden

**4.8. Hat die Plattform dir Sicherheit im Umgang mit deinen persönlichen Daten vermittelt?**

|                          |                          |                          |                          |                          |
|--------------------------|--------------------------|--------------------------|--------------------------|--------------------------|
| <input type="checkbox"/> |
| 1                        | 2                        | 3                        | 4                        | 5                        |

überhaupt nicht zutreffend      eher weniger zutreffend      mäßig zutreffend      eher zutreffend      sehr zutreffend

**4.9. Würden Sie die Reduct-Web-App an andere Betroffene weiterempfehlen?**

|                          |    |                          |      |
|--------------------------|----|--------------------------|------|
| <input type="checkbox"/> | ja | <input type="checkbox"/> | nein |
|--------------------------|----|--------------------------|------|

**4.10. Würden Sie die Reduct-Web-App zukünftig nutzen?**

|                          |    |                          |      |
|--------------------------|----|--------------------------|------|
| <input type="checkbox"/> | ja | <input type="checkbox"/> | nein |
|--------------------------|----|--------------------------|------|

**4.11. Inwiefern denken Sie, dass Sie persönlich von unserer Reduct-Web-App profitiert haben?**

|                          |                          |                          |                          |                          |
|--------------------------|--------------------------|--------------------------|--------------------------|--------------------------|
| <input type="checkbox"/> |
| 1                        | 2                        | 3                        | 4                        | 5                        |

überhaupt nicht      kaum      mäßig      eher      Sehr

1  
2  
3  
4  
5  
6  
7  
8  
9  
10  
11  
12  
13  
14  
15  
16  
17  
18  
19  
20  
21  
22  
23  
24  
25  
26  
27  
28  
29  
30  
31  
32  
33  
34  
35  
36  
37  
38  
39  
40  
41  
42  
43  
44  
45  
46  
47  
48  
49  
50  
51  
52  
53  
54  
55  
56  
57  
58  
59  
60

**4.12. Wurden Sie durch die Plattform „Reduct-Web-App“ motiviert, dass Training weiterzuführen?**

|                              |                           |                          |                          |                          |
|------------------------------|---------------------------|--------------------------|--------------------------|--------------------------|
| <input type="checkbox"/>     | <input type="checkbox"/>  | <input type="checkbox"/> | <input type="checkbox"/> | <input type="checkbox"/> |
| 1                            | 2                         | 3                        | 4                        | 5                        |
| Trifft überhaupt<br>nicht zu | Trifft eher<br>weniger zu | Trifft mäßig zu          | Trifft eher zu           | Trifft vollkommen<br>zu  |

**4.13. Konnten Sie die Nutzung der Reduct-Web-App gut in Ihren Alltag einbauen?**

|                          |                          |                          |                          |                          |
|--------------------------|--------------------------|--------------------------|--------------------------|--------------------------|
| <input type="checkbox"/> |
| überhaupt nicht<br>gut   | Weniger gut              | mäßig                    | Eher gut                 | Sehr gut                 |

**4.14. Konnten Sie sich gut auf die Inhalte konzentrieren, wenn Sie das Training genutzt haben?**

|                              |                           |                           |                          |                          |
|------------------------------|---------------------------|---------------------------|--------------------------|--------------------------|
| <input type="checkbox"/>     | <input type="checkbox"/>  | <input type="checkbox"/>  | <input type="checkbox"/> | <input type="checkbox"/> |
| 1                            | 2                         | 3                         | 4                        | 5                        |
| Trifft überhaupt<br>nicht zu | Trifft eher<br>weniger zu | Trifft teilweise zu<br>zu | Trifft eher zu           | Trifft vollkommen<br>zu  |

**5.15. Hat Ihnen die Reduct-Web-App dabei geholfen mit krankheitsbezogenen Belastungen besser umzugehen?**

|                              |                           |                           |                          |                          |
|------------------------------|---------------------------|---------------------------|--------------------------|--------------------------|
| <input type="checkbox"/>     | <input type="checkbox"/>  | <input type="checkbox"/>  | <input type="checkbox"/> | <input type="checkbox"/> |
| 1                            | 2                         | 3                         | 4                        | 5                        |
| Trifft überhaupt<br>nicht zu | Trifft eher<br>weniger zu | Trifft teilweise zu<br>zu | Trifft eher zu           | Trifft vollkommen<br>zu  |

4.16. Geben Sie hierunter an, inwieweit Sie das jeweilige in der Reduct-Web-App behandelte Thema als für Sie persönlich relevant im Umgang mit Ihrer Krebserkrankung empfunden haben.

|                                | Überhaupt<br>nicht<br>relevant | Wenig<br>relevant | Mäßig<br>relevant | Eher<br>relevant | Sehr<br>relevant | Kann ich<br>nicht<br>beurteilen |
|--------------------------------|--------------------------------|-------------------|-------------------|------------------|------------------|---------------------------------|
| Gesundheitsbezogenes Verhalten | 1                              | 2                 | 3                 | 4                | 5                | 6                               |
| Gefühle                        | 1                              | 2                 | 3                 | 4                | 5                | 6                               |
| Kreativität                    | 1                              | 2                 | 3                 | 4                | 5                | 6                               |
| Schmerzerleben                 | 1                              | 2                 | 3                 | 4                | 5                | 6                               |
| Angst                          | 1                              | 2                 | 3                 | 4                | 5                | 6                               |
| Kraftquellen                   | 1                              | 2                 | 3                 | 4                | 5                | 6                               |
| Positivität                    | 1                              | 2                 | 3                 | 4                | 5                | 6                               |
| Körpergefühl                   | 1                              | 2                 | 3                 | 4                | 5                | 6                               |
| Bewegung und Entspannung       | 1                              | 2                 | 3                 | 4                | 5                | 6                               |
| Stressmanagement               | 1                              | 2                 | 3                 | 4                | 5                | 6                               |
| Schlaf                         | 1                              | 2                 | 3                 | 4                | 5                | 6                               |
| Selbstzuwendung                | 1                              | 2                 | 3                 | 4                | 5                | 6                               |
| Beziehungen                    | 1                              | 2                 | 3                 | 4                | 5                | 6                               |

4.17 Beschreiben Sie kurz in Ihren eigenen Worten, inwiefern die Reduct-Web-App Ihnen im Umgang mit den Belastungen im Rahmen Ihrer Krebserkrankung geholfen hat.

**III. Fragen zur Beschäftigung mit Achtsamkeit und der Reduct-Web-App**

**1) Bitte geben Sie an, wie häufig Sie während der Laufzeit der Reduct-Web-App Achtsamkeitsübungen in Ihren Alltag eingebaut haben.**

|                          |                          |                          |                          |                          |                          |
|--------------------------|--------------------------|--------------------------|--------------------------|--------------------------|--------------------------|
| <input type="checkbox"/> |
| 1                        | 2                        | 3                        | 4                        | 5                        | 6                        |
| (fast) nie               | Ca. einmal im Monat      | Mehrmals im Monat        | Ca. einmal in der Woche  | Mehrmals in der Woche    | (fast) täglich           |

**2) Konnten Sie die in der Reduct-Web-App erlernten Strategien/Skills in Ihren Alltag integrieren?**

|                          |                          |                          |                          |                          |                          |
|--------------------------|--------------------------|--------------------------|--------------------------|--------------------------|--------------------------|
| <input type="checkbox"/> |
| 1                        | 2                        | 3                        | 4                        | 5                        | 6                        |
| (fast) nie               | Ca. einmal im Monat      | Mehrmals im Monat        | Ca. einmal in der Woche  | Mehrmals in der Woche    | (fast) täglich           |

**IV Fragen zur psychotherapeutischen/psychopharmakologischen Behandlung****1) Nehmen Sie aktuell Medikamente gegen Ängste, Depression oder Schlafstörungen ein?** Nein Ja, folgende: \_\_\_\_\_

Dosis \_\_\_\_\_

Seit wann? \_\_\_\_\_

**2) Sind Sie aktuell in psychotherapeutischer/psychiatrischer Behandlung?** Nein Ja

Wie viele Sitzungen haben stattgefunden? \_\_\_\_\_ Sitzungen

**3) Haben Sie in den letzten vier Monaten regelmäßige (mindestens 1x pro Woche, für mindestens 4 Wochen) psychoonkologische Termine in der Klinik, bei einem ambulanten PsychoonkologIn, oder in einer Krebsberatungsstelle gehabt?** Nein Ja

1  
2  
3  
4  
5  
6  
7  
8  
9  
10  
11  
12  
13  
14  
15  
16 Liebe Teilnehmerin, lieber Teilnehmer,

17  
18 vielen Dank für Ihre Teilnahme an der zweiten Befragung. Wir würden uns freuen, wenn Sie  
19 weiterhin an unserer Studie teilnehmen, indem Sie zwei weitere Fragebögen bearbeiten. Hierzu  
20 werden wir Sie in jeweils 3 und 6 Monaten benachrichtigen. Die Bearbeitung wird deutlich weniger  
21 Zeit in Anspruch nehmen, als die Bearbeitung der ersten beiden Fragebögen.  
22

23  
24 Sollten Sie Fragen haben, können Sie gerne jederzeit eine E-Mail an [reduct@uni-due.de](mailto:reduct@uni-due.de) senden.

25  
26 Auf diesem Wege wünschen wir Ihnen weiterhin alles Gute.

27  
28 Ihr Reduct Team  
29  
30  
31  
32  
33  
34  
35  
36  
37  
38  
39  
40  
41  
42  
43  
44  
45  
46  
47  
48  
49  
50  
51  
52  
53  
54  
55  
56  
57  
58  
59  
60

Teilnehmer-ID: \_\_\_\_\_

# Reduct- Web-Basierte Achtsamkeits- und Skillsbasierte Stressreduktion für Patientinnen und Patienten mit Krebs

Liebe Teilnehmerin, lieber Teilnehmer,

willkommen zurück! Mittlerweile sind einige Wochen vergangen, seitdem Sie die Reduct-Web-App genutzt haben. Wir hoffen, dass Sie die Inhalte des online Trainings weiterhin in Ihrem Alltag begleiten. Vielleicht haben Sie diese immer mal wieder hilfreich erlebt oder sind seitdem achtsamer in Ihrem Alltag. Dies ist der vorletzte Fragebogen, Sie werden etwa 10-15 Minuten zur Bearbeitung benötigen.

Sollten Sie Fragen haben, können Sie gerne jederzeit eine E-Mail an [reduct@uni-due.de](mailto:reduct@uni-due.de) senden.

Wenn Sie merken, dass Sie sich sehr belastet fühlen und Sie mehr Unterstützung bei der Bewältigung Ihrer Erkrankung benötigen, können Sie sich jederzeit an die/den Studienverantwortliche/n Ihres Zentrums wenden. Diese/r kann Ihnen bei der Suche psychoonkologischer Hilfsangebote zur Seite stehen.

Vielen Dank für Ihre Teilnahme und Unterstützung!

Ihr Reduct Team

\*Kontaktdaten

[2]



## I. Fragen zu Ihrem derzeitigen Befinden

### 1. Angst und Stresserleben

Bitte beantworten Sie im Folgenden, wie sehr die jeweilige Aussage in der letzten Woche auf Sie zutraf.

- |                                                                                           |                                                                     |
|-------------------------------------------------------------------------------------------|---------------------------------------------------------------------|
| 1.1. Ich fühle mich angespannt oder überreizt.                                            | 1.2. Ich fühle mich in meinen Aktivitäten gebremst.                 |
| 3 meistens                                                                                | 3 fast immer                                                        |
| 2 oft                                                                                     | 2 sehr oft                                                          |
| 1 von Zeit zu Zeit/ gelegentlich                                                          | 1 manchmal                                                          |
| 0 überhaupt nicht                                                                         | 0 überhaupt nicht                                                   |
| 1.3. Ich kann mich heute noch so freuen wie früher.                                       | 1.4. Ich habe manchmal ein ängstliches Gefühl in der Magengegend.   |
| 0 ganz genau so                                                                           | 0 überhaupt nicht                                                   |
| 1 nicht ganz so sehr                                                                      | 1 gelegentlich                                                      |
| 2 Nur noch ein wenig                                                                      | 2 ziemlich oft                                                      |
| 3 kaum oder gar nicht                                                                     | 3 sehr oft                                                          |
| 1.5. Mich überkommt eine ängstliche Vorahnung, dass etwas Schreckliches passieren könnte. | 1.6. Ich habe das Interesse an meiner äußeren Erscheinung verloren. |
| 3 ja, sehr stark                                                                          | 3 ja, stimmt genau                                                  |
| 2 ja, aber nicht allzu stark                                                              | 2 ich kümmere mich nicht so sehr darum, wie ich sollte              |
| 1 etwas, aber es macht mir keine Sorgen                                                   | 1 möglicherweise kümmere ich mich zu wenig darum                    |
| 0 überhaupt nicht                                                                         | 0 ich kümmere mich so viel darum wie immer                          |
| 1.7. Ich kann lachen und die lustige Seite der Dinge sehen.                               | 1.8. Ich fühle mich rastlos, muss immer in Bewegung sein.           |
| 0 ja, so viel wie immer                                                                   | 3 ja, tatsächlich sehr                                              |
| 1 nicht mehr ganz so viel                                                                 | 2 ziemlich                                                          |
| 2 inzwischen viel weniger                                                                 | 1 nicht sehr                                                        |
| 3 überhaupt nicht                                                                         | 0 überhaupt nicht                                                   |

1.9. Mir gehen beunruhigende Gedanken durch den Kopf.

- 3 einen Großteil der Zeit  
 2 verhältnismäßig oft  
 1 von Zeit zu Zeit, aber nicht allzu oft  
 0 nur gelegentlich/nie

1.10. Ich blicke mit Freude in die Zukunft.

- 0 ja, sehr  
 1 eher weniger als früher  
 2 viel weniger als früher  
 3 kaum bis gar nicht

1.11. Ich fühle mich glücklich.

- 3 überhaupt nicht  
 2 selten  
 1 manchmal  
 0 meistens

1.12. Mich überkommt plötzlich ein panikartiger Zustand.

- 3 ja, tatsächlich sehr oft  
 2 ziemlich oft  
 1 nicht sehr oft  
 0 überhaupt nicht

1.13. Ich kann behaglich dasitzen und mich entspannen.

- 0 ja, natürlich  
 1 gewöhnlich schon  
 2 nicht oft  
 3 überhaupt nicht

1.14. Ich kann mich an einem guten Buch, einer Radio- oder Fernsehsendung erfreuen.

- 0 oft  
 1 manchmal  
 2 Eher selten  
 3 Sehr selten

## 2. Belastungsthermometer

Bitte markieren Sie am Thermometer die Zahl, die am besten beschreibt, wie belastet Sie sich in der letzten Woche einschließlich heute gefühlt haben.

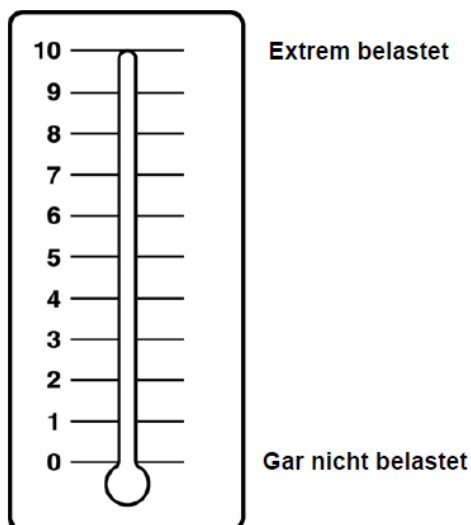

### 3. Skala zur Allgemeinen Selbstwirksamkeitserwartung

Kreuzen Sie bitte bei jeder Frage die Antwort an, die am besten auf Sie zutrifft.

|                                                                                                    | Stimmt<br>nicht | Stimmt<br>kaum | Stimmt<br>eher | Stimmt<br>genau |
|----------------------------------------------------------------------------------------------------|-----------------|----------------|----------------|-----------------|
| 3.1. Wenn sich Widerstände auftun, finde ich Mittel und Wege, mich durchzusetzen.                  | 1               | 2              | 3              | 4               |
| 3.2. Die Lösung schwieriger Probleme gelingt mir immer, wenn ich mich darum bemühe.                | 1               | 2              | 3              | 4               |
| 3.3. Es bereitet mir keine Schwierigkeiten, meine Absichten und Ziele zu verwirklichen.            | 1               | 2              | 3              | 4               |
| 3.4. In unerwarteten Situationen weiß ich immer, wie ich mich verhalten soll.                      | 1               | 2              | 3              | 4               |
| 3.5. Auch bei überraschenden Ereignissen glaube ich, dass ich gut mit ihnen zurechtkommen kann.    | 1               | 2              | 3              | 4               |
| 3.6. Schwierigkeiten sehe ich gelassen entgegen, weil ich meinen Fähigkeiten immer vertrauen kann. | 1               | 2              | 3              | 4               |
| 3.7. Was auch immer passiert, ich werde schon klarkommen.                                          | 1               | 2              | 3              | 4               |
| 3.8. Für jedes Problem kann ich eine Lösung finden.                                                | 1               | 2              | 3              | 4               |
| 3.9. Wenn eine neue Sache auf mich zukommt, weiß ich, wie ich damit umgehen kann.                  | 1               | 2              | 3              | 4               |
| 3.10. Wenn ein Problem auftaucht, kann ich es aus eigener Kraft meistern.                          | 1               | 2              | 3              | 4               |

#### 4. Lebensqualität (EORT-QLQ-C30)

Bitte kreuzen Sie im Folgenden Abschnitt die Zahl von 1 bis 4 an, die am besten auf Sie zutrifft.

|                                                                                                                                      | Überhaupt<br>nicht | Wenig | Mäßig | Sehr |
|--------------------------------------------------------------------------------------------------------------------------------------|--------------------|-------|-------|------|
| 4.1. Bereitet es Ihnen Schwierigkeiten, sich körperlich anzustrengen (z.B. eine schwere Einkaufstasche oder einen Koffer zu tragen)? | 1                  | 2     | 3     | 4    |
| 4.2. Bereitet es Ihnen Schwierigkeiten, einen <u>längeren</u> Spaziergang zu machen?                                                 | 1                  | 2     | 3     | 4    |
| 4.3. Bereitet es Ihnen Schwierigkeiten, eine <u>kurze</u> Strecke außer Haus zu gehen?                                               | 1                  | 2     | 3     | 4    |
| 4.4. Müssen Sie tagsüber im Bett liegen oder in einem Sessel sitzen?                                                                 | 1                  | 2     | 3     | 4    |
| 4.5. Brauchen Sie Hilfe beim Essen, Anziehen, Waschen oder Benutzen der Toilette?                                                    | 1                  | 2     | 3     | 4    |
| <b>Während der letzten Woche:</b>                                                                                                    |                    |       |       |      |
|                                                                                                                                      | Überhaupt<br>nicht | Wenig | Mäßig | Sehr |
| 4.6. Waren Sie bei Ihrer Arbeit oder bei anderen tagtäglichen Beschäftigungen eingeschränkt?                                         | 1                  | 2     | 3     | 4    |
| 4.7. Waren Sie bei Ihren Hobbys oder andere Freizeitbeschäftigungen eingeschränkt?                                                   | 1                  | 2     | 3     | 4    |
| 4.8. Waren Sie kurzatmig?                                                                                                            | 1                  | 2     | 3     | 4    |
| 4.9. Hatten Sie Schmerzen?                                                                                                           | 1                  | 2     | 3     | 4    |
| 4.10. Mussten Sie sich ausruhen?                                                                                                     | 1                  | 2     | 3     | 4    |
| 4.11. Hatten Sie Schlafstörungen?                                                                                                    | 1                  | 2     | 3     | 4    |

4.12. Fühlten Sie sich schwach?

1                      2                      3                      4

**Während der letzten Woche:**

**Überhaupt  
nicht**

**Wenig**

**Mäßig**

**Sehr**

4.13. Hatten Sie Appetitmangel?

1                      2                      3                      4

4.14. War Ihnen übel?

1                      2                      3                      4

4.15. Haben Sie erbrochen?

1                      2                      3                      4

4.16. Hatten Sie Verstopfung?

1                      2                      3                      4

4.17. Hatten Sie Durchfall?

1                      2                      3                      4

4.18. Waren Sie müde?

1                      2                      3                      4

4.19. Fühlten Sie sich durch  
Schmerzen in Ihrem alltäglichen  
Leben beeinträchtigt?

1                      2                      3                      4

4.20. Hatten Sie Schwierigkeiten, sich  
auf etwas zu konzentrieren, z.B. auf  
das Zeitungslesen oder das  
Fernsehen?

1                      2                      3                      4

4.21. Fühlten Sie sich angespannt?

1                      2                      3                      4

4.22. Haben Sie sich Sorgen  
gemacht?

1                      2                      3                      4

4.23. Waren Sie reizbar?

1                      2                      3                      4

4.24. Fühlten Sie sich  
niedergeschlagen?

1                      2                      3                      4

4.25. Hatten Sie Schwierigkeiten, sich  
an Dinge zu erinnern?

1                      2                      3                      4

4.26. Hat Ihr körperlicher Zustand  
oder Ihre medizinische Behandlung  
Ihr Familienleben beeinträchtigt?

1                      2                      3                      4

1  
2  
3 4.27. Hat Ihr körperlicher Zustand 1 2 3 4  
4 oder Ihre medizinische Behandlung  
5 Ihr Zusammensein oder Ihre  
6 gemeinsamen Unternehmungen mit  
7 anderen Menschen beeinträchtigt?  
8

9  
10  
11 4.28. Hat Ihr körperlicher Zustand 1 2 3 4  
12 oder Ihre medizinische Behandlung  
13 für Sie finanzielle Schwierigkeiten mit  
14 sich gebracht?  
15  
16

17  
18  
19 **Bitte kreuzen Sie bei den folgenden Fragen die Zahl zwischen 1 und 7 an, die am besten auf Sie**  
20 **zutrifft.**

21  
22 4.29. Wie würden Sie insgesamt Ihren Gesundheitszustand während der letzten Woche  
23 einschätzen?

24  
25 1 2 3 4 5 6 7  
26  
27 sehr ausgezeichnet  
28 schlecht

29  
30 4.30. Wie würden Sie insgesamt Ihre Lebensqualität während der letzten Woche einschätzen?

31  
32 1 2 3 4 5 6 7  
33  
34 sehr ausgezeichnet  
35 schlecht  
36  
37  
38  
39  
40  
41  
42  
43  
44  
45  
46  
47  
48  
49  
50  
51  
52  
53  
54  
55  
56  
57  
58  
59  
60

1  
2  
3  
4  
5  
6  
7  
8  
9  
10  
11  
12

## 5. Lebensqualität (EQ-5D-5L)

Bitte kreuzen Sie unter jeder Überschrift das Kästchen an, das Ihren Gesundheitszustand heute am besten beschreibt.

### 5.1. Beweglichkeit/Mobilität

- 13  
14  
15  
16  
17  
18  
19  
20  
21  
22  
23  
24
- |                                         |   |
|-----------------------------------------|---|
| Ich habe keine Probleme herumzugehen    | 1 |
| Ich habe leichte Probleme herumzugehen  | 2 |
| Ich habe mäßige Probleme herumzugehen   | 3 |
| Ich habe große Probleme herumzugehen    | 4 |
| Ich bin nicht in der Lage, herumzugehen | 5 |

### 5.2. Für sich selbst sorgen

- 25  
26  
27  
28  
29  
30  
31  
32  
33  
34  
35  
36  
37  
38  
39
- |                                                                   |   |
|-------------------------------------------------------------------|---|
| Ich habe keine Probleme, mich selbst zu waschen oder anzuziehen   | 1 |
| Ich habe leichte Probleme, mich selbst zu waschen oder anzuziehen | 2 |
| Ich habe mäßige Probleme, mich selbst zu waschen oder anzuziehen  | 3 |
| Ich habe große Probleme, mich selbst zu waschen oder anzuziehen   | 4 |
| Ich bin nicht in der Lage, mich selbst zu waschen oder anzuziehen | 5 |

### 5.3. Alltägliche Tätigkeiten (z.B. Arbeit, Studium, Hausarbeit, Familien- oder Freizeitaktivitäten)

- 40  
41  
42  
43  
44  
45  
46  
47  
48  
49  
50  
51  
52  
53  
54  
55  
56  
57  
58  
59  
60
- |                                                                        |   |
|------------------------------------------------------------------------|---|
| Ich habe keine Probleme, meinen alltäglichen Tätigkeiten nachzugehen   | 1 |
| Ich habe leichte Probleme, meinen alltäglichen Tätigkeiten nachzugehen | 2 |
| Ich habe mäßige Probleme, meinen alltäglichen Tätigkeiten nachzugehen  | 3 |
| Ich habe große Probleme, meinen alltäglichen Tätigkeiten nachzugehen   | 4 |
| Ich bin nicht in der Lage, meinen alltäglichen Tätigkeiten nachzugehen | 5 |

**5.4. Schmerzen/Körperliche Beschwerden**

|                                             |   |
|---------------------------------------------|---|
| Ich habe keine Schmerzen oder Beschwerden   | 1 |
| Ich habe leichte Schmerzen oder Beschwerden | 2 |
| Ich habe mäßige Schmerzen oder Beschwerden  | 3 |
| Ich habe starke Schmerzen oder Beschwerden  | 4 |
| Ich habe extreme Schmerzen oder Beschwerden | 5 |

**5.5. Angst/Niedergeschlagenheit**

|                                             |   |
|---------------------------------------------|---|
| Ich bin nicht ängstlich oder deprimiert     | 1 |
| Ich bin ein wenig ängstlich oder deprimiert | 2 |
| Ich bin mäßig ängstlich oder deprimiert     | 3 |
| Ich bin sehr ängstlich oder deprimiert      | 4 |
| Ich bin extrem ängstlich oder deprimiert    | 5 |



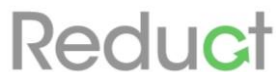

5.6 Um Sie bei der Einschätzung, wie gut oder wie schlecht Ihr Gesundheitszustand ist, zu unterstützen, haben wir eine Skala gezeichnet, ähnlich einem Thermometer. Der best denkbare Gesundheitszustand ist mit einer "100" gekennzeichnet, der schlechteste mit "0".

Wir möchten Sie nun bitten, auf dieser Skala zu kennzeichnen, wie gut oder schlecht Ihrer Ansicht nach Ihr persönlicher Gesundheitszustand heute ist. Bitte verbinden Sie dazu den untenstehenden Kasten mit dem Punkt auf der Skala, der Ihren heutigen Gesundheitszustand am besten wiedergibt.

**Ihr heutiger  
Gesundheitszustand**



## 6. Achtsamkeit (FFA)

Dieser Fragebogen soll Ihre Achtsamkeit erfassen. Bitte beziehen Sie dabei die Aussagen auf die letzten 14 Tage. Kreuzen Sie bitte bei jeder Frage die Antwort an, die am besten auf Sie zutrifft.

|                                                                                                             | Fast<br>nie | Eher selten | Relativ<br>oft | Fast<br>immer |
|-------------------------------------------------------------------------------------------------------------|-------------|-------------|----------------|---------------|
| 6.1. Ich bin offen für die Erfahrung des Augenblicks.                                                       | 1           | 2           | 3              | 4             |
| 6.2. Ich spüre in meinen Körper hinein, sei es beim Essen, Kochen, Putzen, Reden.                           | 1           | 2           | 3              | 4             |
| 6.3. Wenn ich merke, dass ich abwesend war, kehre ich sanft zur Erfahrung des Augenblicks zurück.           | 1           | 2           | 3              | 4             |
| 6.4. Ich kann mich selbst wertschätzen.                                                                     | 1           | 2           | 3              | 4             |
| 6.5. Ich achte auf die Motive meiner Handlungen.                                                            | 1           | 2           | 3              | 4             |
| 6.6. Ich sehe meine Fehler und Schwierigkeiten, ohne mich zu verurteilen.                                   | 1           | 2           | 3              | 4             |
| 6.7. Ich bin in Kontakt mit meinen Erfahrungen, hier und jetzt.                                             | 1           | 2           | 3              | 4             |
| 6.8. Ich nehme unangenehme Erfahrungen an.                                                                  | 1           | 2           | 3              | 4             |
| 6.9. Ich bin mir selbst gegenüber freundlich, wenn Dinge schief laufen.                                     | 1           | 2           | 3              | 4             |
| 6.10. Ich beobachte meine Gefühle, ohne mich in ihnen zu verlieren.                                         | 1           | 2           | 3              | 4             |
| 6.11. In schwierigen Situationen kann ich innehalten.                                                       | 1           | 2           | 3              | 4             |
| 6.12. Ich erlebe Momente innerer Ruhe und Gelassenheit, selbst wenn äußerlich Schmerzen und Unruhe da sind. | 1           | 2           | 3              | 4             |
| 6.13. Ich bin ungeduldig mit mir und meinen Mitmenschen.                                                    | 4           | 3           | 2              | 1             |
| 6.14. Ich kann darüber lächeln, wenn ich sehe, wie ich mir manchmal das Leben schwer mache.                 | 1           | 2           | 3              | 4             |

7. Wie oft fühlten Sie sich im Verlauf der letzten 2 Wochen durch die folgenden Beschwerden beeinträchtigt? (PHQ-4)

|                                                                      | Überhaupt nicht | An einzelnen Tagen | An mehr als der Hälfte der Tage | Beinahe jeden Tag |
|----------------------------------------------------------------------|-----------------|--------------------|---------------------------------|-------------------|
| 7.1. Wenig Interesse oder Freude an Ihren Tätigkeiten                | 0               | 1                  | 2                               | 3                 |
| 7.2. Niedergeschlagenheit, Schwermut oder Hoffnungslosigkeit         | 0               | 1                  | 2                               | 3                 |
| 7.3. Nervosität, Ängstlichkeit oder Anspannung                       | 0               | 1                  | 2                               | 3                 |
| 7.4. Nicht in der Lage sein, Sorgen zu stoppen oder zu kontrollieren | 0               | 1                  | 2                               | 3                 |

## 8. Skills

Kreuzen Sie bitte bei jeder Frage die Antwort an, die am besten auf Sie zutrifft.

|                                                                                                               | Stimmt<br>überhaupt<br>nicht |   | Neutral |   | Stimmt<br>voll-<br>kommen |
|---------------------------------------------------------------------------------------------------------------|------------------------------|---|---------|---|---------------------------|
| 8.1. In belastenden Situationen kann ich mich aufmuntern, indem ich meine Gedanken auf positive Dinge richte. | 1                            | 2 | 3       | 4 | 5                         |
| 8.2. Meine Gedanken geben mir im Umgang mit stressigen Situationen Kraft.                                     | 1                            | 2 | 3       | 4 | 5                         |
| 8.3. Wenn ich belastende Gefühle verspüre, lasse ich sie zu.                                                  | 1                            | 2 | 3       | 4 | 5                         |
| 8.4. Ich kann Dinge annehmen, die ich nicht ändern kann.                                                      | 1                            | 2 | 3       | 4 | 5                         |
| 8.5. Ich überlege mir, was ich im Umgang mit der Krebserkrankung tun kann.                                    | 1                            | 2 | 3       | 4 | 5                         |
| 8.6. Ich führe oft bestimmte Aktivitäten aus, um auf andere Gedanken zu kommen.                               | 1                            | 2 | 3       | 4 | 5                         |
| 8.7. Ich kann mir wohlwollend begegnen.                                                                       | 1                            | 2 | 3       | 4 | 5                         |
| 8.8. Ich kann gut für mich sorgen.                                                                            | 1                            | 2 | 3       | 4 | 5                         |
| 8.9. Ich suche Kontakt zu liebevollen Menschen.                                                               | 1                            | 2 | 3       | 4 | 5                         |
| 8.10. Ich kann nach Unterstützung suchen.                                                                     | 1                            | 2 | 3       | 4 | 5                         |

## II. Achtsamkeit und Nutzung der Reduct-Web-App in der Zwischenzeit

1) Bitte geben Sie an, wie häufig Sie seit der Bearbeitung des letzten Fragebogens bzw. der Reduct-Web-App Achtsamkeitsübungen in Ihren Alltag eingebaut haben.

|                          |                          |                          |                          |                          |                          |
|--------------------------|--------------------------|--------------------------|--------------------------|--------------------------|--------------------------|
| <input type="checkbox"/> |
| 1                        | 2                        | 3                        | 4                        | 5                        | 6                        |
| (fast) nie               | Ca. einmal im Monat      | Mehrmals im Monat        | Ca. einmal in der Woche  | Mehrmals in der Woche    | (fast) täglich           |

2) Konnten Sie die erlernten Strategien/Skills in Ihren Alltag integrieren?

|                          |                          |                          |                          |                          |                          |
|--------------------------|--------------------------|--------------------------|--------------------------|--------------------------|--------------------------|
| <input type="checkbox"/> |
| 1                        | 2                        | 3                        | 4                        | 5                        | 6                        |
| (fast) nie               | Ca. einmal im Monat      | Mehrmals im Monat        | Ca. einmal in der Woche  | Mehrmals in der Woche    | (fast) täglich           |

3) Haben Ihnen die Inhalte der Reduct-Web-App dabei geholfen, mit krankheitsbezogenen Belastungen besser umzugehen?

|                           |                          |                          |                          |                          |
|---------------------------|--------------------------|--------------------------|--------------------------|--------------------------|
| <input type="checkbox"/>  | <input type="checkbox"/> | <input type="checkbox"/> | <input type="checkbox"/> | <input type="checkbox"/> |
| 1                         | 2                        | 3                        | 4                        | 5                        |
| Trifft überhaupt nicht zu | Trifft eher weniger zu   | Trifft teilweise zu      | Trifft eher zu           | Trifft vollkommen zu     |

### III. Gesundheitsökonomische Fragen

#### 1. Lag bei Ihnen innerhalb der letzten 3 Monate eine Arbeitsunfähigkeit (AU) vor?

nein

ja

wenn ja, bitte geben Sie den Zeitraum jeder AU mit Datum an und fassen dabei die Dauer für jede zusammenhängende AU (Folgebescheinigungen) wegen derselben Erkrankung zusammen.

1. AU: von \_\_.\_\_.\_\_\_\_(TT.MM.JJJJ) bis \_\_.\_\_.\_\_\_\_(TT.MM.JJJJ)

2. AU: von \_\_.\_\_.\_\_\_\_(TT.MM.JJJJ) bis \_\_.\_\_.\_\_\_\_(TT.MM.JJJJ)

3. AU: von \_\_.\_\_.\_\_\_\_(TT.MM.JJJJ) bis \_\_.\_\_.\_\_\_\_(TT.MM.JJJJ)

4. AU: von \_\_.\_\_.\_\_\_\_(TT.MM.JJJJ) bis \_\_.\_\_.\_\_\_\_(TT.MM.JJJJ)

5. AU: von \_\_.\_\_.\_\_\_\_(TT.MM.JJJJ) bis \_\_.\_\_.\_\_\_\_(TT.MM.JJJJ)

#### 2. Bezogen Sie in den letzten 3 Monaten bzw. beziehen Sie aktuell Krankengeld?

nein

ja

wenn ja, geben Sie bitte den Zeitraum des Krankengeldbezugs an:

von \_\_.\_\_.\_\_\_\_(TT.MM.JJJJ) bis \_\_.\_\_.\_\_\_\_(TT.MM.JJJJ)

#### 3. Hatten Sie innerhalb der letzten 3 Monate Kontakt mit einer ambulanten Arztpraxis (inkl. Rezept/Überweisung abholen, Blutabnahme, telefonische Beratung, Impfung und Hausbesuch)? Bitte beziehen Sie Arztkontakte im Rahmen der Reduct-Studie nicht ein.

nein

ja, welche:

Hausarzt Anzahl Besuche: \_\_\_\_

Augenarzt: Anzahl Besuche: \_\_\_\_

Chirurg: Anzahl Besuche: \_\_\_\_

Gynäkologe: Anzahl Besuche: \_\_\_\_

Hautarzt: Anzahl Besuche: \_\_\_\_

HNO-Arzt: Anzahl Besuche: \_\_\_\_

psychiatrische Institutsambulanz (PIA) und ambulante Kontakte im psychiatrischen/psychosomatischen Krankenhaus Anzahl Besuche: \_\_\_\_

Internist (z.B. Onkologe, , Kardiologe, Gastroenterologe, Nephrologe, Diabetologe, Pulmologe, usw.) Anzahl Besuche: \_\_\_\_

Neurologe: Anzahl Besuche: \_\_\_\_

Orthopäde: Anzahl Besuche: \_\_\_\_

Psychiater: Anzahl Besuche: \_\_\_\_



**5. Haben Sie innerhalb der letzten 3 Monate an einer Rehabilitations-Maßnahme teilgenommen?**

nein

ja

wenn ja, geben Sie bitte den Zeitraum des Reha-Aufenthaltes an und machen Angaben zum Grund des Aufenthaltes, zur Abteilung und zur Unterbringungsform:

Aufenthalt 1 von \_\_\_\_\_.\_\_\_\_(TT.MM.JJJJ) bis \_\_\_\_\_.\_\_\_\_(TT.MM.JJJJ)

andere Abteilungen (primär körperliche Erkrankungen/ Behandlungen)

wegen einer sonstigen psychischen Erkrankung

Stationär

Teilstationär (Tages-/Nachklinik)

Aufenthalt 2 von \_\_\_\_\_.\_\_\_\_(TT.MM.JJJJ) bis \_\_\_\_\_.\_\_\_\_(TT.MM.JJJJ)

andere Abteilungen (primär körperliche Erkrankungen/ Behandlungen)

wegen einer sonstigen psychischen Erkrankung

Stationär

Teilstationär (Tages-/Nachklinik)

**6. Haben Sie innerhalb der letzten 3 Monate Medikamente eingenommen?**

nein  ja

wenn ja, geben Sie bitte den Medikamentennamen/Wirkstoff an, die Ihnen von einem Arzt verordnet wurden, die Dosis pro Tag und die Einnahmedauer an:

1. Medikament: \_\_\_\_\_ Tagesdosis: \_\_\_\_\_

Einnahme von \_\_\_\_\_.\_\_\_\_(TT.MM.JJJJ) bis \_\_\_\_\_.\_\_\_\_(TT.MM.JJJJ), ganzer Zeitraum

2. Medikament: \_\_\_\_\_ Tagesdosis: \_\_\_\_\_

Einnahme von \_\_\_\_\_.\_\_\_\_(TT.MM.JJJJ) bis \_\_\_\_\_.\_\_\_\_(TT.MM.JJJJ), ganzer Zeitraum

3. Medikament: \_\_\_\_\_ Tagesdosis: \_\_\_\_\_

Einnahme von \_\_\_\_\_.\_\_\_\_(TT.MM.JJJJ) bis \_\_\_\_\_.\_\_\_\_(TT.MM.JJJJ), ganzer Zeitraum

4. Medikament: \_\_\_\_\_ Tagesdosis: \_\_\_\_\_

Einnahme von \_\_\_\_\_.\_\_\_\_(TT.MM.JJJJ) bis \_\_\_\_\_.\_\_\_\_(TT.MM.JJJJ), ganzer Zeitraum

5. Medikament: \_\_\_\_\_ Tagesdosis: \_\_\_\_\_

Einnahme von \_\_\_\_\_.\_\_\_\_(TT.MM.JJJJ) bis \_\_\_\_\_.\_\_\_\_(TT.MM.JJJJ), ganzer Zeitraum

6. Medikament: \_\_\_\_\_ Tagesdosis: \_\_\_\_\_

Einnahme von \_\_\_\_\_.\_\_\_\_(TT.MM.JJJJ) bis \_\_\_\_\_.\_\_\_\_(TT.MM.JJJJ), ganzer Zeitraum



1  
2  
3  
4  
5  
6 **7. Haben Sie innerhalb der letzten 3 Monate Heilmittel in Anspruch genommen (z.B.**  
7 **Physiotherapie, Logopädie, Ergotherapie)?**

8  nein

9  ja

10  Physiotherapie: Anzahl Besuche: \_\_\_\_

11  
12  Logopädie: Anzahl Besuche: \_\_\_\_

13  
14  
15  Ergotherapie/Arbeitstherapie: Anzahl Besuche: \_\_\_\_

16  
17  Soziotherapie: Anzahl Besuche: \_\_\_\_

18  
19  Tanztherapie/Bewegungstherapie: Anzahl Besuche: \_\_\_\_

20  Einzel  Gruppe

21  
22  Kreativtherapie: Anzahl Besuche: \_\_\_\_

23  Einzel  Gruppe

24  
25  Kunsttherapie: Anzahl Besuche: \_\_\_\_

26  Einzel  Gruppe

27  
28  Musiktherapie: Anzahl Besuche: \_\_\_\_

29  Einzel  Gruppe

30  
31  Theatertherapie: Anzahl Besuche: \_\_\_\_

32  Einzel  Gruppe

33  
34  Entspannungstechniken (autogenes Training) /progressive  
35 Muskelentspannung): Anzahl Besuche: \_\_\_\_

36  Einzel  Gruppe

37  
38  sonstige, und zwar: \_\_\_\_\_ Anzahl Besuche: \_\_\_\_

39  Einzel  Gruppe

1  
2  
3 **8. Haben Sie innerhalb der letzten 3 Monate folgende Angebote in Anspruch genommen?**  
4  
5

6 **(Nicht im Rahmen eines ambulanten Arzt-/Psychotherapeutenkontaktes oder**  
7 **Krankenhauskontakt)**  
8

9  
10  Psychoonkologische Beratungsstelle:

11 Anzahl Kontakte: \_\_\_ durchschnittliche Dauer pro Kontakt: \_\_\_\_\_ Minuten  
12

13  
14  Beratungsstelle bei psychischen Problemen:

15 Anzahl Kontakte: \_\_\_ durchschnittliche Dauer pro Kontakt: \_\_\_\_\_ Minuten  
16

17  
18  Sozialpsychiatrischer Dienst/Psychosozialer Krisendienst:

19 Anzahl Kontakte: \_\_\_ durchschnittliche Dauer pro Kontakt: \_\_\_\_\_ Minuten  
20

21  
22  Tagesstätten/Kontaktstätten für Menschen mit psychischen Problemen:

23 Anzahl Kontakte: \_\_\_ durchschnittliche Dauer pro Kontakt: \_\_\_\_\_ Minuten  
24

25  
26  Selbsthilfegruppen aufgrund psychischer Probleme:

27 Anzahl Kontakte: \_\_\_ durchschnittliche Dauer pro Kontakt: \_\_\_\_\_ Minuten  
28

29  
30  weitere Angebote aufgrund psychischer Probleme (z.B. Sorgentelefon)

31 und zwar: \_\_\_\_\_  
32

33 Anzahl Kontakte: \_\_\_ durchschnittliche Dauer pro Kontakt: \_\_\_\_\_ Minuten  
34  
35  
36  
37

38 **9. Bitte geben Sie an, ob bei Ihnen aktuell ein Pflegegrad vorliegt.**

39  nein

40  ja, seit \_\_\_\_\_

41  Pflegegrad 1

42  Pflegegrad 2

43  Pflegegrad 3

44  Pflegegrad 4

45  Pflegegrad 5  
46  
47  
48  
49  
50  
51  
52  
53  
54  
55  
56  
57  
58  
59  
60

**10.** Bitte geben Sie an, ob Sie Leistungen der Pflegekasse beziehen.

- nein
- ja
- Pflegegeld für häusliche Pflege
  - Pflegesachleistungen für häusliche Pflege
  - kombinierte Pflegegeld und Pflegesachleistung
  - Entlastungsbetrag bei häuslicher Pflege
  - Wohnumfeld verbessernde Maßnahmen
  - Pflegesachleistungen für teilstationäre Pflege
  - Pflegesachleistungen für vollstationäre Pflege
  - zum Verbrauch bestimmte Pflegehilfsmittel

**IV Fragen zur psychotherapeutischen/psychopharmakologischen Behandlung****1) Nehmen Sie aktuell Medikamente gegen Ängste, Depression oder Schlafstörungen ein?**

- Nein
- Ja, folgende: \_\_\_\_\_
- Dosis \_\_\_\_\_
- Seit wann? \_\_\_\_\_

**2) Sind Sie aktuell in psychotherapeutischer/psychiatrischer Behandlung?**

- Nein
- Ja

Wie viele Sitzungen haben stattgefunden? \_\_\_\_\_ Sitzungen

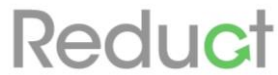

1  
2  
3  
4  
5  
6 Liebe Teilnehmerin, lieber Teilnehmer,

7  
8 Vielen Dank, dass Sie uns mit Ihrer Teilnahme an unserer Befragung unterstützen!

9  
10 In drei Monaten werden Sie einen letzten Fragebogen erhalten. Nach der Bearbeitung dieses  
11 Fragebogens ist die Studie abgeschlossen.

12  
13 Sollten Sie Fragen haben, können Sie gerne jederzeit eine E-Mail an [reduct@uni-due.de](mailto:reduct@uni-due.de) senden.

14  
15  
16 Auf diesem Wege wünschen wir Ihnen weiterhin alles Gute

17  
18 Ihr Reduct Team  
19  
20  
21  
22  
23  
24  
25  
26  
27  
28  
29  
30  
31  
32  
33  
34  
35  
36  
37  
38  
39  
40  
41  
42  
43  
44  
45  
46  
47  
48  
49  
50  
51  
52  
53  
54  
55  
56  
57  
58  
59  
60

Teilnehmer-ID: \_\_\_\_\_

# Reduct- Web-Basierte Achtsamkeits- und Skillsbasierte Stressreduktion für Patientinnen und Patienten mit Krebs

Liebe Teilnehmerin, lieber Teilnehmer,

wir haben beobachtet, dass Sie unsere Reduct-Web-App nicht weitergenutzt haben. Wir hoffen, dass sich Ihr Gesundheitszustand nicht verschlechtert hat und nicht ausschlaggebend für den Abbruch des Trainings ist.

Wir bedanken uns bei Ihnen, dass Sie unserer Reduct-Web-App eine Chance gegeben haben und dass Sie nun einen letzten Fragebogen ausfüllen. Sie helfen uns mit Ihrer Meinung sehr und tragen zur Weiterentwicklung und Verbesserung von unserer Reduct-Web-App bei.

Für uns ist es in diesem Fragebogen in erster Linie wichtig zu erfahren, warum Sie sich entschlossen haben, das Training nicht fortzuführen. Ihre Ehrlichkeit und Offenheit wird uns sehr weiterhelfen und einen Beitrag leisten zur Verbesserung zukünftiger psychoonkologischer Versorgungsangebote.

Sollten Sie Fragen haben, können Sie gerne jederzeit eine E-Mail an [reduct@uni-due.de](mailto:reduct@uni-due.de) senden.

Wenn Sie merken, dass Sie sich sehr belastet fühlen und Sie Unterstützung bei der Bewältigung Ihrer Erkrankung benötigen, können Sie sich jederzeit an die/den Studienverantwortliche/n Ihres Zentrums wenden. Diese/r kann Ihnen bei der Suche psychoonkologischer Hilfsangebote zur Seite stehen.

Herzlichen Dank und alles Gute,

Ihr Reduct Team

*[Hier Kontaktdaten im eCRF einfügen](#)*

## I. Fragen zu Ihrem derzeitigen Befinden

### 1. Angst und Stresserleben

Bitte beantworten Sie im Folgenden, wie sehr die jeweilige Aussage in der letzten Woche auf Sie zutraf.

- |                                                                                           |                                                                     |
|-------------------------------------------------------------------------------------------|---------------------------------------------------------------------|
| 1.1. Ich fühle mich angespannt oder überreizt.                                            | 1.2. Ich fühle mich in meinen Aktivitäten gebremst.                 |
| 3 meistens                                                                                | 3 fast immer                                                        |
| 2 oft                                                                                     | 2 sehr oft                                                          |
| 1 von Zeit zu Zeit/ gelegentlich                                                          | 1 manchmal                                                          |
| 0 überhaupt nicht                                                                         | 0 überhaupt nicht                                                   |
| 1.3. Ich kann mich heute noch so freuen wie früher.                                       | 1.4. Ich habe manchmal ein ängstliches Gefühl in der Magengegend.   |
| 0 ganz genau so                                                                           | 0 überhaupt nicht                                                   |
| 1 nicht ganz so sehr                                                                      | 1 gelegentlich                                                      |
| 2 Nur noch ein wenig                                                                      | 2 ziemlich oft                                                      |
| 3 kaum oder gar nicht                                                                     | 3 sehr oft                                                          |
| 1.5. Mich überkommt eine ängstliche Vorahnung, dass etwas Schreckliches passieren könnte. | 1.6. Ich habe das Interesse an meiner äußeren Erscheinung verloren. |
| 3 ja, sehr stark                                                                          | 3 ja, stimmt genau                                                  |
| 2 ja, aber nicht allzu stark                                                              | 2 ich kümmere mich nicht so sehr darum, wie ich sollte              |
| 1 etwas, aber es macht mir keine Sorgen                                                   | 1 möglicherweise kümmere ich mich zu wenig darum                    |
| 0 überhaupt nicht                                                                         | 0 ich kümmere mich so viel darum wie immer                          |
| 1.7. Ich kann lachen und die lustige Seite der Dinge sehen.                               | 1.8. Ich fühle mich rastlos, muss immer in Bewegung sein.           |
| 0 ja, so viel wie immer                                                                   | 3 ja, tatsächlich sehr                                              |
| 1 nicht mehr ganz so viel                                                                 | 2 ziemlich                                                          |
| 2 inzwischen viel weniger                                                                 | 1 nicht sehr                                                        |
| 3 überhaupt nicht                                                                         | 0 überhaupt nicht                                                   |

1.9. Mir gehen beunruhigende Gedanken durch den Kopf.

- 3 einen Großteil der Zeit  
 2 verhältnismäßig oft  
 1 von Zeit zu Zeit, aber nicht allzu oft  
 0 nur gelegentlich/nie

1.10. Ich blicke mit Freude in die Zukunft.

- 0 ja, sehr  
 1 eher weniger als früher  
 2 viel weniger als früher  
 3 kaum bis gar nicht

1.11. Ich fühle mich glücklich.

- 3 überhaupt nicht  
 2 selten  
 1 manchmal  
 0 meistens

1.12. Mich überkommt plötzlich ein panikartiger Zustand.

- 3 ja, tatsächlich sehr oft  
 2 ziemlich oft  
 1 nicht sehr oft  
 0 überhaupt nicht

1.13. Ich kann behaglich dasitzen und mich entspannen.

- 0 ja, natürlich  
 1 gewöhnlich schon  
 2 nicht oft  
 3 überhaupt nicht

1.14. Ich kann mich an einem guten Buch, einer Radio- oder Fernsehsendung erfreuen.

- 0 oft  
 1 manchmal  
 2 Eher selten  
 3 Sehr selten

## 2. Belastungsthermometer

Bitte markieren Sie am Thermometer die Zahl, die am besten beschreibt, wie belastet Sie sich in der letzten Woche einschließlich heute gefühlt haben.



### 3. Skala zur Allgemeinen Selbstwirksamkeitserwartung

Kreuzen Sie bitte bei jeder Frage die Antwort an, die am besten auf Sie zutrifft.

1.1. Ich fühle mich angespannt oder überreizt.

- 3 meistens
- 2 oft
- 1 von Zeit zu Zeit/ gelegentlich
- 0 überhaupt nicht

1.2. Ich fühle mich in meinen Aktivitäten gebremst.

- 3 fast immer
- 2 sehr oft
- 1 manchmal
- 0 überhaupt nicht

1.3. Ich kann mich heute noch so freuen wie früher.

- 0 ganz genau so
- 1 nicht ganz so sehr
- 2 Nur noch ein wenig
- 3 kaum oder gar nicht

1.4. Ich habe manchmal ein ängstliches Gefühl in der Magengegend.

- 0 überhaupt nicht
- 1 gelegentlich
- 2 ziemlich oft
- 3 sehr oft

1.5. Mich überkommt eine ängstliche Vorahnung, dass etwas Schreckliches passieren könnte.

- 3 ja, sehr stark
- 2 ja, aber nicht allzu stark
- 1 etwas, aber es macht mir keine Sorgen
- 0 überhaupt nicht

1.6. Ich habe das Interesse an meiner äußeren Erscheinung verloren.

- 3 ja, stimmt genau
- 2 ich kümmere mich nicht so sehr darum, wie ich sollte
- 1 möglicherweise kümmere ich mich zu wenig darum
- 0 ich kümmere mich so viel darum wie immer

1.7. Ich kann lachen und die lustige Seite der Dinge sehen.

- 0 ja, so viel wie immer
- 1 nicht mehr ganz so viel
- 2 inzwischen viel weniger
- 3 überhaupt nicht

1.8. Ich fühle mich rastlos, muss immer in Bewegung sein.

- 3 ja, tatsächlich sehr
- 2 ziemlich
- 1 nicht sehr
- 0 überhaupt nicht



1.9. Mir gehen beunruhigende Gedanken durch den Kopf.

- 3 einen Großteil der Zeit
- 2 verhältnismäßig oft
- 1 von Zeit zu Zeit, aber nicht allzu oft
- 0 nur gelegentlich/nie

1.11. Ich fühle mich glücklich.

- 3 überhaupt nicht
- 2 selten
- 1 manchmal
- 0 meistens

1.13. Ich kann behaglich dasitzen und mich entspannen.

- 0 ja, natürlich
- 1 gewöhnlich schon
- 2 nicht oft
- 3 überhaupt nicht

1.10. Ich blicke mit Freude in die Zukunft.

- 0 ja, sehr
- 1 eher weniger als früher
- 2 viel weniger als früher
- 3 kaum bis gar nicht

1.12. Mich überkommt plötzlich ein panikartiger Zustand.

- 3 ja, tatsächlich sehr oft
- 2 ziemlich oft
- 1 nicht sehr oft
- 0 überhaupt nicht

1.14. Ich kann mich an einem guten Buch, einer Radio- oder Fernsehsendung erfreuen.

- 0 oft
- 1 manchmal
- 2 Eher selten
- 3 Sehr selten

#### 4. Lebensqualität (EORT-QLQ-C30)

Bitte kreuzen Sie im Folgenden Abschnitt die Zahl von 1 bis 4 an, die am besten auf Sie zutrifft.

|                                                                                                                                      | Überhaupt<br>nicht | Wenig | Mäßig | Sehr |
|--------------------------------------------------------------------------------------------------------------------------------------|--------------------|-------|-------|------|
| 4.1. Bereitet es Ihnen Schwierigkeiten, sich körperlich anzustrengen (z.B. eine schwere Einkaufstasche oder einen Koffer zu tragen)? | 1                  | 2     | 3     | 4    |
| 4.2. Bereitet es Ihnen Schwierigkeiten, einen <u>längeren</u> Spaziergang zu machen?                                                 | 1                  | 2     | 3     | 4    |
| 4.3. Bereitet es Ihnen Schwierigkeiten, eine <u>kurze</u> Strecke außer Haus zu gehen?                                               | 1                  | 2     | 3     | 4    |
| 4.4. Müssen Sie tagsüber im Bett liegen oder in einem Sessel sitzen?                                                                 | 1                  | 2     | 3     | 4    |
| 4.5. Brauchen Sie Hilfe beim Essen, Anziehen, Waschen oder Benutzen der Toilette?                                                    | 1                  | 2     | 3     | 4    |
| <b>Während der letzten Woche:</b>                                                                                                    |                    |       |       |      |
|                                                                                                                                      | Überhaupt<br>nicht | Wenig | Mäßig | Sehr |
| 4.6. Waren Sie bei Ihrer Arbeit oder bei anderen tagtäglichen Beschäftigungen eingeschränkt?                                         | 1                  | 2     | 3     | 4    |
| 4.7. Waren Sie bei Ihren Hobbys oder andere Freizeitbeschäftigungen eingeschränkt?                                                   | 1                  | 2     | 3     | 4    |
| 4.8. Waren Sie kurzatmig?                                                                                                            | 1                  | 2     | 3     | 4    |
| 4.9. Hatten Sie Schmerzen?                                                                                                           | 1                  | 2     | 3     | 4    |
| 4.10. Mussten Sie sich ausruhen?                                                                                                     | 1                  | 2     | 3     | 4    |
| 4.11. Hatten Sie Schlafstörungen?                                                                                                    | 1                  | 2     | 3     | 4    |

4.12. Fühlten Sie sich schwach?

1                      2                      3                      4

**Während der letzten Woche:**

**Überhaupt  
nicht**

**Wenig**

**Mäßig**

**Sehr**

4.13. Hatten Sie Appetitmangel?

1                      2                      3                      4

4.14. War Ihnen übel?

1                      2                      3                      4

4.15. Haben Sie erbrochen?

1                      2                      3                      4

4.16. Hatten Sie Verstopfung?

1                      2                      3                      4

4.17. Hatten Sie Durchfall?

1                      2                      3                      4

4.18. Waren Sie müde?

1                      2                      3                      4

4.19. Fühlten Sie sich durch  
Schmerzen in Ihrem alltäglichen  
Leben beeinträchtigt?

1                      2                      3                      4

4.20. Hatten Sie Schwierigkeiten, sich  
auf etwas zu konzentrieren, z.B. auf  
das Zeitungslesen oder das  
Fernsehen?

1                      2                      3                      4

4.21. Fühlten Sie sich angespannt?

1                      2                      3                      4

4.22. Haben Sie sich Sorgen  
gemacht?

1                      2                      3                      4

4.23. Waren Sie reizbar?

1                      2                      3                      4

4.24. Fühlten Sie sich  
niedergeschlagen?

1                      2                      3                      4

4.25. Hatten Sie Schwierigkeiten, sich  
an Dinge zu erinnern?

1                      2                      3                      4

4.26. Hat Ihr körperlicher Zustand  
oder Ihre medizinische Behandlung  
Ihr Familienleben beeinträchtigt?

1                      2                      3                      4

1  
2  
3 4.27. Hat Ihr körperlicher Zustand 1 2 3 4  
4 oder Ihre medizinische Behandlung  
5 Ihr Zusammensein oder Ihre  
6 gemeinsamen Unternehmungen mit  
7 anderen Menschen beeinträchtigt?  
8

9  
10  
11 4.28. Hat Ihr körperlicher Zustand 1 2 3 4  
12 oder Ihre medizinische Behandlung  
13 für Sie finanzielle Schwierigkeiten mit  
14 sich gebracht?  
15  
16

17  
18  
19  
20  
21 **Bitte kreuzen Sie bei den folgenden Fragen die Zahl zwischen 1 und 7 an, die am besten auf Sie**  
22 **zutrifft.**

23  
24 4.29. Wie würden Sie insgesamt Ihren Gesundheitszustand während der letzten Woche  
25 einschätzen?

26  
27 1 2 3 4 5 6 7  
28  
29 sehr ausgezeichnet  
30 schlecht

31  
32 4.30. Wie würden Sie insgesamt Ihre Lebensqualität während der letzten Woche einschätzen?  
33

34 1 2 3 4 5 6 7  
35  
36 sehr ausgezeichnet  
37 schlecht  
38  
39  
40  
41  
42  
43  
44  
45  
46  
47  
48  
49  
50  
51  
52  
53  
54  
55  
56  
57  
58  
59  
60

## 5. Lebensqualität (EQ-5D-5L)

Bitte kreuzen Sie unter jeder Überschrift das Kästchen an, das Ihren Gesundheitszustand heute am besten beschreibt.

### 5.1. Beweglichkeit/Mobilität

- |                                         |   |
|-----------------------------------------|---|
| Ich habe keine Probleme herumzugehen    | 1 |
| Ich habe leichte Probleme herumzugehen  | 2 |
| Ich habe mäßige Probleme herumzugehen   | 3 |
| Ich habe große Probleme herumzugehen    | 4 |
| Ich bin nicht in der Lage, herumzugehen | 5 |

### 5.2. Für sich selbst sorgen

- |                                                                   |   |
|-------------------------------------------------------------------|---|
| Ich habe keine Probleme, mich selbst zu waschen oder anzuziehen   | 1 |
| Ich habe leichte Probleme, mich selbst zu waschen oder anzuziehen | 2 |
| Ich habe mäßige Probleme, mich selbst zu waschen oder anzuziehen  | 3 |
| Ich habe große Probleme, mich selbst zu waschen oder anzuziehen   | 4 |
| Ich bin nicht in der Lage, mich selbst zu waschen oder anzuziehen | 5 |

### 5.3. Alltägliche Tätigkeiten (z.B. Arbeit, Studium, Hausarbeit, Familien- oder Freizeitaktivitäten)

- |                                                                        |   |
|------------------------------------------------------------------------|---|
| Ich habe keine Probleme, meinen alltäglichen Tätigkeiten nachzugehen   | 1 |
| Ich habe leichte Probleme, meinen alltäglichen Tätigkeiten nachzugehen | 2 |
| Ich habe mäßige Probleme, meinen alltäglichen Tätigkeiten nachzugehen  | 3 |
| Ich habe große Probleme, meinen alltäglichen Tätigkeiten nachzugehen   | 4 |
| Ich bin nicht in der Lage, meinen alltäglichen Tätigkeiten nachzugehen | 5 |

**5.4. Schmerzen/Körperliche Beschwerden**

|    |                                             |   |
|----|---------------------------------------------|---|
| 1  |                                             |   |
| 2  |                                             |   |
| 3  |                                             |   |
| 4  |                                             |   |
| 5  | Ich habe keine Schmerzen oder Beschwerden   | 1 |
| 6  |                                             |   |
| 7  |                                             |   |
| 8  | Ich habe leichte Schmerzen oder Beschwerden | 2 |
| 9  |                                             |   |
| 10 | Ich habe mäßige Schmerzen oder Beschwerden  | 3 |
| 11 |                                             |   |
| 12 |                                             |   |
| 13 | Ich habe starke Schmerzen oder Beschwerden  | 4 |
| 14 |                                             |   |
| 15 | Ich habe extreme Schmerzen oder Beschwerden | 5 |
| 16 |                                             |   |
| 17 |                                             |   |

**5.5. Angst/Niedergeschlagenheit**

|    |                                             |   |
|----|---------------------------------------------|---|
| 18 |                                             |   |
| 19 |                                             |   |
| 20 | Ich bin nicht ängstlich oder deprimiert     | 1 |
| 21 |                                             |   |
| 22 | Ich bin ein wenig ängstlich oder deprimiert | 2 |
| 23 |                                             |   |
| 24 |                                             |   |
| 25 | Ich bin mäßig ängstlich oder deprimiert     | 3 |
| 26 |                                             |   |
| 27 | Ich bin sehr ängstlich oder deprimiert      | 4 |
| 28 |                                             |   |
| 29 |                                             |   |
| 30 | Ich bin extrem ängstlich oder deprimiert    | 5 |
| 31 |                                             |   |
| 32 |                                             |   |
| 33 |                                             |   |
| 34 |                                             |   |
| 35 |                                             |   |
| 36 |                                             |   |
| 37 |                                             |   |
| 38 |                                             |   |
| 39 |                                             |   |
| 40 |                                             |   |
| 41 |                                             |   |
| 42 |                                             |   |
| 43 |                                             |   |
| 44 |                                             |   |
| 45 |                                             |   |
| 46 |                                             |   |
| 47 |                                             |   |
| 48 |                                             |   |
| 49 |                                             |   |
| 50 |                                             |   |
| 51 |                                             |   |
| 52 |                                             |   |
| 53 |                                             |   |
| 54 |                                             |   |
| 55 |                                             |   |
| 56 |                                             |   |
| 57 |                                             |   |
| 58 |                                             |   |
| 59 |                                             |   |
| 60 |                                             |   |

5.6. Um Sie bei der Einschätzung, wie gut oder wie schlecht Ihr Gesundheitszustand ist, zu unterstützen, haben wir eine Skala gezeichnet, ähnlich einem Thermometer. Der best denkbare Gesundheitszustand ist mit einer "100" gekennzeichnet, der schlechteste mit "0".

Wir möchten Sie nun bitten, auf dieser Skala zu kennzeichnen, wie gut oder schlecht Ihrer Ansicht nach Ihr persönlicher Gesundheitszustand heute ist. Bitte verbinden Sie dazu den untenstehenden Kasten mit dem Punkt auf der Skala, der Ihren heutigen Gesundheitszustand am besten wiedergibt.

**Ihr heutiger  
Gesundheitszustand**

11  
Best  
denkbarer  
Gesundheitszustand

100

90

80

70

60

50

40

30

20

10

0

Schlechtest  
denkbarer  
Gesundheitszustand

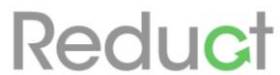

1  
2  
3  
4 **6. Achtsamkeit (FFA)**  
5

6 **Dieser Fragebogen soll Ihre Achtsamkeit erfassen. Bitte beziehen Sie dabei die Aussagen auf die**  
7 **letzten 14 Tage. Kreuzen Sie bitte bei jeder Frage die Antwort an, die am besten auf Sie zutrifft.**  
8  
9

10  
11  
12  
13  
14  
15  
16  
17  
18  
19  
20  
21  
22  
23  
24  
25  
26  
27  
28  
29  
30  
31  
32  
33  
34  
35  
36  
37  
38  
39  
40  
41  
42  
43  
44  
45  
46  
47  
48  
49  
50  
51  
52  
53  
54  
55  
56  
57  
58  
59  
60

For peer review only



**7. Wie oft fühlten Sie sich im Verlauf der letzten 2 Wochen durch die folgenden Beschwerden beeinträchtigt? (PHQ-4)**

|                                                                                                             | <b>Fast nie</b> | <b>Eher selten</b> | <b>Relativ oft</b> | <b>Fast immer</b> |
|-------------------------------------------------------------------------------------------------------------|-----------------|--------------------|--------------------|-------------------|
| 6.1. Ich bin offen für die Erfahrung des Augenblicks.                                                       | 1               | 2                  | 3                  | 4                 |
| 6.2. Ich spüre in meinen Körper hinein, sei es beim Essen, Kochen, Putzen, Reden.                           | 1               | 2                  | 3                  | 4                 |
| 6.3. Wenn ich merke, dass ich abwesend war, kehre ich sanft zur Erfahrung des Augenblicks zurück.           | 1               | 2                  | 3                  | 4                 |
| 6.4. Ich kann mich selbst wertschätzen.                                                                     | 1               | 2                  | 3                  | 4                 |
| 6.5. Ich achte auf die Motive meiner Handlungen.                                                            | 1               | 2                  | 3                  | 4                 |
| 6.6. Ich sehe meine Fehler und Schwierigkeiten, ohne mich zu verurteilen.                                   | 1               | 2                  | 3                  | 4                 |
| 6.7. Ich bin in Kontakt mit meinen Erfahrungen, hier und jetzt.                                             | 1               | 2                  | 3                  | 4                 |
| 6.8. Ich nehme unangenehme Erfahrungen an.                                                                  | 1               | 2                  | 3                  | 4                 |
| 6.9. Ich bin mir selbst gegenüber freundlich, wenn Dinge schiefgehen.                                       | 1               | 2                  | 3                  | 4                 |
| 6.10. Ich beobachte meine Gefühle, ohne mich in ihnen zu verlieren.                                         | 1               | 2                  | 3                  | 4                 |
| 6.11. In schwierigen Situationen kann ich innehalten.                                                       | 1               | 2                  | 3                  | 4                 |
| 6.12. Ich erlebe Momente innerer Ruhe und Gelassenheit, selbst wenn äußerlich Schmerzen und Unruhe da sind. | 1               | 2                  | 3                  | 4                 |
| 6.13. Ich bin ungeduldig mit mir und meinen Mitmenschen.                                                    | 4               | 3                  | 2                  | 1                 |
| 6.14. Ich kann darüber lächeln, wenn ich sehe, wie ich mir manchmal das Leben schwer mache.                 | 1               | 2                  | 3                  | 4                 |

|                                                                      | Überhaupt<br>nicht | An einzelnen<br>Tagen | An mehr als<br>der Hälfte der<br>Tage | Beinahe<br>jeden Tag |
|----------------------------------------------------------------------|--------------------|-----------------------|---------------------------------------|----------------------|
| 7.1. Wenig Interesse oder Freude an Ihren Tätigkeiten                | 0                  | 1                     | 2                                     | 3                    |
| 7.2. Niedergeschlagenheit, Schwermut oder Hoffnungslosigkeit         | 0                  | 1                     | 2                                     | 3                    |
| 7.3. Nervosität, Ängstlichkeit oder Anspannung                       | 0                  | 1                     | 2                                     | 3                    |
| 7.4. Nicht in der Lage sein, Sorgen zu stoppen oder zu kontrollieren | 0                  | 1                     | 2                                     | 3                    |

## 8. Skills

Kreuzen Sie bitte bei jeder Frage die Antwort an, die am besten auf Sie zutrifft.

## II. Fragen zur Reduct-Web-App

1. Bitte geben Sie an, aus welchem Grund Sie die Nutzung der Reduct-Web-App nicht fortgeführt haben. Hiermit helfen Sie dabei, unsere Web-App zu verbessern und weiter zu entwickeln.

|                                                                                                               | Stimmt<br>überhaupt<br>nicht | 1 | 2 | Neutral | 3 | 4 | Stimmt<br>voll-<br>kommen | 5 |
|---------------------------------------------------------------------------------------------------------------|------------------------------|---|---|---------|---|---|---------------------------|---|
| 8.1. In belastenden Situationen kann ich mich aufmuntern, indem ich meine Gedanken auf positive Dinge richte. | 1                            | 2 | 3 | 4       | 5 |   |                           |   |
| 8.2. Meine Gedanken geben mir im Umgang mit stressigen Situationen Kraft.                                     | 1                            | 2 | 3 | 4       | 5 |   |                           |   |
| 8.3. Wenn ich belastende Gefühle verspüre, lasse ich sie zu.                                                  | 1                            | 2 | 3 | 4       | 5 |   |                           |   |
| 8.4. Ich kann Dinge annehmen, die ich nicht ändern kann.                                                      | 1                            | 2 | 3 | 4       | 5 |   |                           |   |
| 8.5. Ich überlege mir, was ich im Umgang mit der Krebserkrankung tun kann.                                    | 1                            | 2 | 3 | 4       | 5 |   |                           |   |
| 8.6. Ich führe oft bestimmte Aktivitäten aus, um auf andere Gedanken zu kommen.                               | 1                            | 2 | 3 | 4       | 5 |   |                           |   |
| 8.7. Ich kann mir wohlwollend begegnen.                                                                       | 1                            | 2 | 3 | 4       | 5 |   |                           |   |
| 8.8. Ich kann gut für mich sorgen.                                                                            | 1                            | 2 | 3 | 4       | 5 |   |                           |   |
| 8.9. Ich suche Kontakt zu liebevollen Menschen.                                                               | 1                            | 2 | 3 | 4       | 5 |   |                           |   |
| 8.10. Ich kann nach Unterstützung suchen.                                                                     | 1                            | 2 | 3 | 4       | 5 |   |                           |   |

- 1  
2  
3  Verschlechterung meines psychischen Zustandes  
4  Verschlechterung meines körperlichen Zustandes  
5  Ich habe das Training nicht als hilfreich erlebt  
6  
7  Technische Probleme  
8  Zeitmangel  
9  Fehlendes Interesse  
10  
11  Fehlende Motivation  
12  
13  Anderer Grund: \_\_\_\_\_  
14  
15  
16 \_\_\_\_\_  
17  
18  
19

## 2. Patientenzufriedenheit (CSQ-1 adapted to Internet-based interventions)

Nun folgen Fragen dazu, wie zufrieden Sie mit dem Training/ der Reduct-Web-App waren.

|                                                                                                                                                             | Trifft<br>nicht zu       | Trifft<br>eher<br>nicht zu | Trifft<br>teilweise<br>zu | Trifft voll<br>und ganz<br>zu |
|-------------------------------------------------------------------------------------------------------------------------------------------------------------|--------------------------|----------------------------|---------------------------|-------------------------------|
| 29<br>30<br>31 2.1. Das Training, an dem ich teilgenommen<br>32 habe, hatte eine hohe Qualität                                                              | <input type="checkbox"/> | <input type="checkbox"/>   | <input type="checkbox"/>  | <input type="checkbox"/>      |
| 33<br>34 1                                                                                                                                                  | 1                        | 2                          | 3                         | 4                             |
| 35<br>36<br>37 2.2. Ich habe die Art von Training erhalten, die<br>38 ich wollte.                                                                           | <input type="checkbox"/> | <input type="checkbox"/>   | <input type="checkbox"/>  | <input type="checkbox"/>      |
| 39<br>40 1                                                                                                                                                  | 1                        | 2                          | 3                         | 4                             |
| 41<br>42<br>43 2.3. Das Training hat meinen Bedürfnissen<br>44 entsprochen.                                                                                 | <input type="checkbox"/> | <input type="checkbox"/>   | <input type="checkbox"/>  | <input type="checkbox"/>      |
| 45<br>46 1                                                                                                                                                  | 1                        | 2                          | 3                         | 4                             |
| 47<br>48<br>49 2.4. Ich würde einem Freund oder einer<br>50 Freundin dieses Training empfehlen, wenn er<br>51 oder sie eine ähnliche Hilfe benötigen würde. | <input type="checkbox"/> | <input type="checkbox"/>   | <input type="checkbox"/>  | <input type="checkbox"/>      |
| 52<br>53 1                                                                                                                                                  | 1                        | 2                          | 3                         | 4                             |
| 54<br>55<br>56<br>57 2.5. Ich bin zufrieden mit dem Ausmaß der<br>58 Hilfe, die ich durch das Training erhalten habe.                                       | <input type="checkbox"/> | <input type="checkbox"/>   | <input type="checkbox"/>  | <input type="checkbox"/>      |
| 59<br>60 1                                                                                                                                                  | 1                        | 2                          | 3                         | 4                             |

2.6. Das Training hat mir dabei geholfen, angemessener mit meinen Problemen umzugehen.

|                          |                          |                          |                          |
|--------------------------|--------------------------|--------------------------|--------------------------|
| <input type="checkbox"/> | <input type="checkbox"/> | <input type="checkbox"/> | <input type="checkbox"/> |
| 1                        | 2                        | 3                        | 4                        |

2.7. Im Großen und Ganzen bin ich mit dem Training zufrieden.

|                          |                          |                          |                          |
|--------------------------|--------------------------|--------------------------|--------------------------|
| <input type="checkbox"/> | <input type="checkbox"/> | <input type="checkbox"/> | <input type="checkbox"/> |
| 1                        | 2                        | 3                        | 4                        |

2.8. Ich würde ein solches Training wieder nutzen, wenn ich Hilfe bräuchte.

|                          |                          |                          |                          |
|--------------------------|--------------------------|--------------------------|--------------------------|
| <input type="checkbox"/> | <input type="checkbox"/> | <input type="checkbox"/> | <input type="checkbox"/> |
| 1                        | 2                        | 3                        | 4                        |

**3. Nutzbarkeit des Trainings (SUS)**

3.1. Ich denke, dass ich das Programm (Reduct-Web-App) häufig benutzen würde.

|                              |                          |                          |                          |                          |                          |
|------------------------------|--------------------------|--------------------------|--------------------------|--------------------------|--------------------------|
| Stimme<br>überhaupt nicht zu |                          |                          |                          |                          | Stimme<br>voll zu        |
| 1                            | 2                        | 3                        | 4                        | 5                        |                          |
| <input type="checkbox"/>     | <input type="checkbox"/> | <input type="checkbox"/> | <input type="checkbox"/> | <input type="checkbox"/> | <input type="checkbox"/> |

3.2. Ich fand das Programm (Reduct-Web-App) unnötig komplex.

|                              |                          |                          |                          |                          |                          |
|------------------------------|--------------------------|--------------------------|--------------------------|--------------------------|--------------------------|
| Stimme<br>überhaupt nicht zu |                          |                          |                          |                          | Stimme<br>voll zu        |
| 1                            | 2                        | 3                        | 4                        | 5                        |                          |
| <input type="checkbox"/>     | <input type="checkbox"/> | <input type="checkbox"/> | <input type="checkbox"/> | <input type="checkbox"/> | <input type="checkbox"/> |

3.3. Ich fand das Programm (Reduct-Web-App) war einfach zu benutzen.

|                              |                          |                          |                          |                          |                          |
|------------------------------|--------------------------|--------------------------|--------------------------|--------------------------|--------------------------|
| Stimme<br>überhaupt nicht zu |                          |                          |                          |                          | Stimme<br>voll zu        |
| 1                            | 2                        | 3                        | 4                        | 5                        |                          |
| <input type="checkbox"/>     | <input type="checkbox"/> | <input type="checkbox"/> | <input type="checkbox"/> | <input type="checkbox"/> | <input type="checkbox"/> |

3.4. Ich denke, ich hätte die Hilfe einer technisch versierten Person benötigt, um das Programm (Reduct-Web-App) besser nutzen zu können.

|                              |                          |                          |                          |                          |                          |
|------------------------------|--------------------------|--------------------------|--------------------------|--------------------------|--------------------------|
| Stimme<br>überhaupt nicht zu |                          |                          |                          |                          | Stimme<br>voll zu        |
| 1                            | 2                        | 3                        | 4                        | 5                        |                          |
| <input type="checkbox"/>     | <input type="checkbox"/> | <input type="checkbox"/> | <input type="checkbox"/> | <input type="checkbox"/> | <input type="checkbox"/> |

3.5. Ich fand, die verschiedenen Funktionen in diesem Programm (Reduct-Web-App) griffen gut ineinander.

| Stimme überhaupt nicht zu |                          |                          |                          |                          | Stimme voll zu           |
|---------------------------|--------------------------|--------------------------|--------------------------|--------------------------|--------------------------|
| 1                         | 2                        | 3                        | 4                        | 5                        |                          |
| <input type="checkbox"/>  | <input type="checkbox"/> | <input type="checkbox"/> | <input type="checkbox"/> | <input type="checkbox"/> | <input type="checkbox"/> |

3.6. Ich denke, das Programm (Reduct-Web-App) enthielt zu viele Inkonsistenzen (Unstimmigkeiten).

| Stimme überhaupt nicht zu |                          |                          |                          |                          | Stimme voll zu           |
|---------------------------|--------------------------|--------------------------|--------------------------|--------------------------|--------------------------|
| 1                         | 2                        | 3                        | 4                        | 5                        |                          |
| <input type="checkbox"/>  | <input type="checkbox"/> | <input type="checkbox"/> | <input type="checkbox"/> | <input type="checkbox"/> | <input type="checkbox"/> |

3.7. Ich kann mir vorstellen, dass die meisten Menschen den Umgang mit diesem Programm (Reduct-Web-App) sehr schnell lernen können.

| Stimme überhaupt nicht zu |                          |                          |                          |                          | Stimme voll zu           |
|---------------------------|--------------------------|--------------------------|--------------------------|--------------------------|--------------------------|
| 1                         | 2                        | 3                        | 4                        | 5                        |                          |
| <input type="checkbox"/>  | <input type="checkbox"/> | <input type="checkbox"/> | <input type="checkbox"/> | <input type="checkbox"/> | <input type="checkbox"/> |

3.8. Ich fand das Programm (Reduct-Web-App) sehr umständlich zu benutzen.

| Stimme überhaupt nicht zu |                          |                          |                          |                          | Stimme voll zu           |
|---------------------------|--------------------------|--------------------------|--------------------------|--------------------------|--------------------------|
| 1                         | 2                        | 3                        | 4                        | 5                        |                          |
| <input type="checkbox"/>  | <input type="checkbox"/> | <input type="checkbox"/> | <input type="checkbox"/> | <input type="checkbox"/> | <input type="checkbox"/> |

3.9. Ich fühlte mich in der Benutzung des Programms (Reduct-Web-App) sehr sicher.

| Stimme überhaupt nicht zu |                          |                          |                          |                          | Stimme voll zu           |
|---------------------------|--------------------------|--------------------------|--------------------------|--------------------------|--------------------------|
| 1                         | 2                        | 3                        | 4                        | 5                        |                          |
| <input type="checkbox"/>  | <input type="checkbox"/> | <input type="checkbox"/> | <input type="checkbox"/> | <input type="checkbox"/> | <input type="checkbox"/> |

3.10. Ich musste eine Menge lernen, ehe ich anfangen konnte, das Programm (Reduct-Web-App) zu verwenden.

| Stimme überhaupt nicht zu |                          |                          |                          |                          | Stimme voll zu           |
|---------------------------|--------------------------|--------------------------|--------------------------|--------------------------|--------------------------|
| 1                         | 2                        | 3                        | 4                        | 5                        |                          |
| <input type="checkbox"/>  | <input type="checkbox"/> | <input type="checkbox"/> | <input type="checkbox"/> | <input type="checkbox"/> | <input type="checkbox"/> |

#### 4. Bewertung von Gesundheitsanwendungen für das Smartphone (Survey for Rating Healthcare Smartphone Applications)

|                                                                                                                     | Gar nicht<br>zutreffend | Ein wenig<br>zutreffen | Großenteils<br>zutreffend | Immer<br>zutreffen |
|---------------------------------------------------------------------------------------------------------------------|-------------------------|------------------------|---------------------------|--------------------|
| 4.1. Die in der Reduct-Web-App bereitgestellten Informationen sind korrekt (es gibt keine ungenauen Informationen). | 1                       | 2                      | 3                         | 4                  |
| 4.2. In der Reduct-Web-App werden klare Informationen bereitgestellt.                                               | 1                       | 2                      | 3                         | 4                  |
| 4.3. Die Gesundheitsinformationen in dem Programm sind leicht verständlich.                                         | 1                       | 2                      | 3                         | 4                  |
| 4.4. Die in der Reduct-Web-App bereitgestellten Gesundheitsinformationen werden in Alltagssprache erklärt.          | 1                       | 2                      | 3                         | 4                  |
| 4.5. Die in der Reduct-Web-App bereitgestellten Informationen sind für Nutzer im Allgemeinen leicht zu lesen.       | 1                       | 2                      | 3                         | 4                  |
| 4.6. Es werden professionelle Gesundheitsinformationen zur Verfügung gestellt.                                      | 1                       | 2                      | 3                         | 4                  |
| 4.7. Gesundheitsinformationen werden systematisch vermittelt.                                                       | 1                       | 2                      | 3                         | 4                  |
| 4.8. Es ist ersichtlich, dass die Gesundheitsinformationen aus verlässlichen Quellen zitiert werden                 | 1                       | 2                      | 3                         | 4                  |
| 4.9. Die bereitgestellten Gesundheitsinformationen stammen von medizinischen Experten.                              | 1                       | 2                      | 3                         | 4                  |
| 4.10. Das Programm ist kohärent/einheitlich in Bezug auf Farbe, Konfiguration und Ausdrucksweise.                   | 1                       | 2                      | 3                         | 4                  |

4.11. Die Anordnung der Symbole steht im Einklang mit dem gesamten Design des Programms.

1 2 3 4

4.12. Icons/Symbole werden in dem Programm einheitlich kategorisiert.

1 2 3 4

4.13. Die Inhalte sind gut organisiert, so dass sie zugänglich und logisch verständlich sind.

1 2 3 4

4.14. Die Bedeutung der einzelnen Icons/Symbole wird deutlich zum Ausdruck gebracht.

1 2 3 4

4.15. Die Reduct-Web-App hat eine gut lesbare Schrift/Schriftart.

1 2 3 4

4.16. Visuelle Elemente verwirren den Nutzer nicht.

1 2 3 4

4.17. Die Struktur der Reduct-Web-App ist klar ersichtlich.

1 2 3 4

4.18. Anweisungen werden kurz und bündig formuliert.

1 2 3 4

4.19. Anweisungen werden präzise erteilt.

1 2 3 4

4.20. Alle Wörter/ Sätze sind nicht nur korrekt geschrieben, sondern auch grammatikalisch korrekt.

1 2 3 4



4.21. Die Reduct-Web-App liefert Informationen zum Thema Datenschutz.

1 2 3 4

4.22. Die Reduct-Web-App liefert Informationen über Sicherheitsrichtlinien in Bezug auf persönliche Gesundheitsinformationen.

1 2 3 4

4.23. Die Reduct-Web-App erklärte das Sicherheitssystem zur Schaffung einer sicheren Umgebung für eine bessere Nutzung der mobilen App.

1 2 3 4

**5. Allgemeine Fragen**

**5.1. Fanden Sie die visuelle Darstellung der Module in der Reduct-Web-App ansprechend?**

|                             |                          |                          |                          |                          |
|-----------------------------|--------------------------|--------------------------|--------------------------|--------------------------|
| <input type="checkbox"/>    | <input type="checkbox"/> | <input type="checkbox"/> | <input type="checkbox"/> | <input type="checkbox"/> |
| 1                           | 2                        | 3                        | 4                        | 5                        |
| überhaupt nicht ansprechend | eher weniger ansprechend | mäßig ansprechend        | eher ansprechend         | sehr ansprechend         |

**5. 2. Waren die Texte klar und verständlich?**

|                          |                          |                          |                          |                          |
|--------------------------|--------------------------|--------------------------|--------------------------|--------------------------|
| <input type="checkbox"/> |
| 1                        | 2                        | 3                        | 4                        | 5                        |
| gar nicht verständlich   | eher nicht verständlich  | mäßig verständlich       | eher verständlich        | sehr verständlich        |

**5.3. Fanden Sie die Videos ansprechend?**

|                              |                          |                          |                          |                          |                              |
|------------------------------|--------------------------|--------------------------|--------------------------|--------------------------|------------------------------|
| <input type="checkbox"/>     | <input type="checkbox"/> | <input type="checkbox"/> | <input type="checkbox"/> | <input type="checkbox"/> | <input type="checkbox"/>     |
| 1                            | 2                        | 3                        | 4                        | 5                        | 6                            |
| überhaupt nicht<br>hilfreich | kaum hilfreich           | mäßig hilfreich          | eher hilfreich           | sehr hilfreich           | Kann ich nicht<br>beurteilen |

**5.4. Fanden Sie die Audio-Dateien ansprechend?**

|                                |                             |                          |                          |                          |                              |
|--------------------------------|-----------------------------|--------------------------|--------------------------|--------------------------|------------------------------|
| <input type="checkbox"/>       | <input type="checkbox"/>    | <input type="checkbox"/> | <input type="checkbox"/> | <input type="checkbox"/> | <input type="checkbox"/>     |
| 1                              | 2                           | 3                        | 4                        | 5                        | 6                            |
| überhaupt nicht<br>ansprechend | eher weniger<br>ansprechend | mäßig<br>ansprechend     | eher<br>ansprechend      | sehr ansprechend         | Kann ich nicht<br>beurteilen |

**5.5. Fanden Sie die Belohnungen ansprechend?**

|                                |                             |                          |                          |                          |                              |
|--------------------------------|-----------------------------|--------------------------|--------------------------|--------------------------|------------------------------|
| <input type="checkbox"/>       | <input type="checkbox"/>    | <input type="checkbox"/> | <input type="checkbox"/> | <input type="checkbox"/> | <input type="checkbox"/>     |
| 1                              | 2                           | 3                        | 4                        | 5                        | 6                            |
| überhaupt nicht<br>ansprechend | eher weniger<br>ansprechend | mäßig<br>ansprechend     | eher<br>ansprechend      | sehr ansprechend         | Kann ich nicht<br>beurteilen |

**5.6. Fanden Sie die Übungen hilfreich?**

|                              |                          |                          |                          |                          |                              |
|------------------------------|--------------------------|--------------------------|--------------------------|--------------------------|------------------------------|
| <input type="checkbox"/>     | <input type="checkbox"/> | <input type="checkbox"/> | <input type="checkbox"/> | <input type="checkbox"/> | <input type="checkbox"/>     |
| 1                            | 2                        | 3                        | 4                        | 5                        | 6                            |
| überhaupt nicht<br>hilfreich | kaum hilfreich           | mäßig hilfreich          | eher hilfreich           | sehr hilfreich           | Kann ich nicht<br>beurteilen |

**5.7. Sind Sie mit der Plattform „Reduct-Web-App“ zufrieden?**

|                              |                          |                          |                          |                          |
|------------------------------|--------------------------|--------------------------|--------------------------|--------------------------|
| <input type="checkbox"/>     | <input type="checkbox"/> | <input type="checkbox"/> | <input type="checkbox"/> | <input type="checkbox"/> |
| 1                            | 2                        | 3                        | 4                        | 5                        |
| überhaupt nicht<br>zufrieden | Kaum zufrieden           | mäßig zufrieden          | Eher zufrieden           | Sehr zufrieden           |

1  
2  
3  
4  
5  
6 **5.8. Hat die Plattform dir Sicherheit im Umgang mit deinen persönlichen Daten vermittelt?**  
7

8

9

10 1 2 3 4 5

11

12 überhaupt nicht eher weniger mäßig zutreffend eher zutreffend sehr zutreffend  
13 zutreffend zutreffend

14  
15  
16

17  
18  
19  
20 **5.9. Würden Sie die Reduct-Web-App an andere Betroffene weiterempfehlen?**  
21

22  ja  nein  
23  
24  
25  
26  
27  
28

29 **5.10. Würden Sie die Reduct-Web-App zukünftig nutzen?**  
30

31  ja  nein  
32  
33  
34  
35  
36  
37

38 **5.11. Inwiefern denken Sie, dass Sie persönlich von unserer Reduct-Web-App profitiert haben?**  
39

40  
41

42

43

44 1 2 3 4 5

45

46 überhaupt nicht kaum mäßig eher Sehr  
47  
48  
49

50 **5.12. Wurden Sie durch die Plattform „Reduct-Web-App“ motiviert, dass Training weiterzuführen?**  
51

52

53

54

55 1 2 3 4 5

56

57 Trifft überhaupt Trifft eher Trifft mäßig zu Trifft eher zu Trifft vollkommen  
58 nicht zu weniger zu zu zu zu  
59  
60

1  
2  
3  
4  
5 **5.13. Konnten Sie die Nutzung der Reduct-Web-App gut in Ihren Alltag einbauen?**  
6

7

8  
9  
10  
11 überhaupt nicht gut      Weniger gut      mäßig      Eher gut      Sehr gut  
12  
13  
14  
15  
16  
17

18 **5.14. Konnten Sie sich gut auf die Inhalte konzentrieren, wenn Sie das Training genutzt haben?**  
19

20

21  
22  
23  
24 Trifft überhaupt nicht zu      Trifft eher weniger zu      Trifft teilweise zu zu      Trifft eher zu      Trifft vollkommen zu  
25  
26  
27  
28  
29  
30  
31

32 **5.15. Hat Ihnen die Reduct-Web-App dabei geholfen mit krankheitsbezogenen Belastungen besser umzugehen?**  
33  
34

35

36  
37 1      2      3      4      5

38  
39 Trifft überhaupt nicht zu      Trifft eher weniger zu      Trifft teilweise zu zu      Trifft eher zu      Trifft vollkommen zu  
40  
41  
42  
43  
44  
45  
46  
47  
48  
49  
50  
51  
52  
53  
54  
55  
56  
57  
58  
59  
60

### III. Fragen zur Beschäftigung mit Achtsamkeit und der Reduct-Web-App

1) Bitte geben Sie an, wie häufig Sie während der Laufzeit der Reduct-Web-App Achtsamkeitsübungen in Ihren Alltag eingebaut haben.

|                          |                          |                          |                          |                          |                          |
|--------------------------|--------------------------|--------------------------|--------------------------|--------------------------|--------------------------|
| <input type="checkbox"/> |
| 1                        | 2                        | 3                        | 4                        | 5                        | 6                        |
| (fast) nie               | Ca. einmal im Monat      | Mehrmals im Monat        | Ca. einmal in der Woche  | Mehrmals in der Woche    | (fast) täglich           |

2) Konnten Sie die in der Reduct-Web-App erlernten Strategien/Skills in Ihren Alltag integrieren?

|                          |                          |                          |                          |                          |                          |
|--------------------------|--------------------------|--------------------------|--------------------------|--------------------------|--------------------------|
| <input type="checkbox"/> |
| 1                        | 2                        | 3                        | 4                        | 5                        | 6                        |
| (fast) nie               | Ca. einmal im Monat      | Mehrmals im Monat        | Ca. einmal in der Woche  | Mehrmals in der Woche    | (fast) täglich           |



1  
2  
3 Liebe Teilnehmerin, lieber Teilnehmer,  
4

5  
6 Vielen Dank für Ihre Teilnahme an der ersten Befragung der Reduct Studie. Für die nächsten Schritte  
7 wird sich das Reduct Team in den nächsten Tagen bei Ihnen melden.  
8

9  
10 Sollten Sie Fragen haben, können Sie gerne jederzeit eine E-Mail an [reduct@uni-due.de](mailto:reduct@uni-due.de) senden.  
11

12  
13 Wir wünschen Ihnen alles Gute!  
14

15 Ihr Reduct Team  
16  
17  
18  
19  
20  
21  
22  
23  
24  
25  
26  
27  
28  
29  
30  
31  
32  
33  
34  
35  
36  
37  
38  
39  
40  
41  
42  
43  
44  
45  
46  
47  
48  
49  
50  
51  
52  
53  
54  
55  
56  
57  
58  
59  
60

For peer review only

**Universitätsklinik für  
Psychosomatische Medizin  
und Psychotherapie**

Direktor: Univ.-Prof. Dr. med. M. Teufel

# Reduct

**Webbasierte Achtsamkeits- und Skills-basierte Belastungsreduktion für Patientinnen und Patienten mit Krebs: Eine multizentrische, randomisierte, kontrollierte Interventionsstudie (Reduct)**

(Web-based Mindfulness and Skills Based Distress Reduction for cancer patients: A multi-center, randomized, controlled intervention study (Reduct))

## Einwilligungserklärung

Ich wurde schriftlich und mündlich über die o. g. Studie aufgeklärt und alle meine Fragen wurden zu meiner Zufriedenheit beantwortet.

Ich nehme freiwillig an dieser Studie teil.

Ich weiß, dass ich meine Einwilligung zur Teilnahme an dieser Studie jederzeit ohne Angabe von Gründen und ohne Nachteile widerrufen kann.

Mir ist bewusst, dass für diese Studie keine Probandenversicherung abgeschlossen wurde, jedoch eine Wegeunfallversicherung (siehe Patienteninformation).

Ich weiß, dass ich jederzeit, beispielsweise im Falle eines Widerrufs, verlangen kann, dass meine bis dahin erhobenen Daten gelöscht oder anonymisiert werden.

**Ich erkläre mich einverstanden, dass im Rahmen der Studie erhobene Daten auf Fragebögen und/oder elektronischen Datenträgern aufgezeichnet und ohne Namensnennung (pseudonymisiert) ausgewertet werden dürfen. Außerdem bin ich damit einverstanden, dass die Studiendaten in anonymisierter Form für wissenschaftliche Darstellungen und Veröffentlichungen verwendet werden dürfen. Ein Bezug zu einer bestimmten Person kann hierbei nicht hergestellt werden.**

**Meine Daten dürfen pseudonymisiert, wie in der Informationsschrift beschrieben, im Rahmen der Studie, also nur an autorisierte Personen, die in die Datenschutzrichtlinien eingeführt sind, weitergegeben werden.**

1  
2  
3 Mit meiner Unterschrift willige ich zudem ein, dass mich das Studienteam per E-Mail und/oder  
4 telefonisch kontaktieren darf.  
5  
6

7  
8 E-Mail-Adresse: \_\_\_\_\_  
9

10 Telefonnummer: \_\_\_\_\_  
11

12 Im Falle eines Studienabbruchs meinerseits erkläre ich mich damit einverstanden, per E-Mail  
13 und/oder telefonisch durch das Studienteam kontaktiert zu werden.

14 Falls Sie dieser Kontaktaufnahme zustimmen, würden Sie im Falle eines Studienabbruchs Ihrerseits  
15 eine E-Mail mit einem online-Link für einen kurzen Fragebogen erhalten.  
16

- 17  
18  Ja  
19  Nein  
20

21 Eine Kopie der Informationsschrift, der Versicherungsbestätigung und Versicherungsbedingungen  
22 sowie der unterschriebenen Einwilligungserklärung habe ich erhalten.  
23  
24  
25

26  
27 \_\_\_\_\_  
28 Ort, Datum

27 \_\_\_\_\_  
28 Name in Druckbuchstaben

27 \_\_\_\_\_  
28 Unterschrift Teilnehmer\*in

31  
32 Teilnehmer ID: \_\_\_\_\_ (wird vom Studienteam ausgefüllt)  
33  
34  
35  
36  
37

38  
39 \_\_\_\_\_  
40 Ort, Datum

38  
39 \_\_\_\_\_  
40 Name in Druckbuchstaben

38  
39 \_\_\_\_\_  
40 Unterschrift der  
41 aufklärenden Person  
42  
43  
44  
45  
46  
47  
48  
49  
50  
51  
52  
53  
54  
55  
56  
57  
58  
59  
60



**Supplementary Material III: Screenshots of the intervention**

Navigation through the modules of the Make It Training

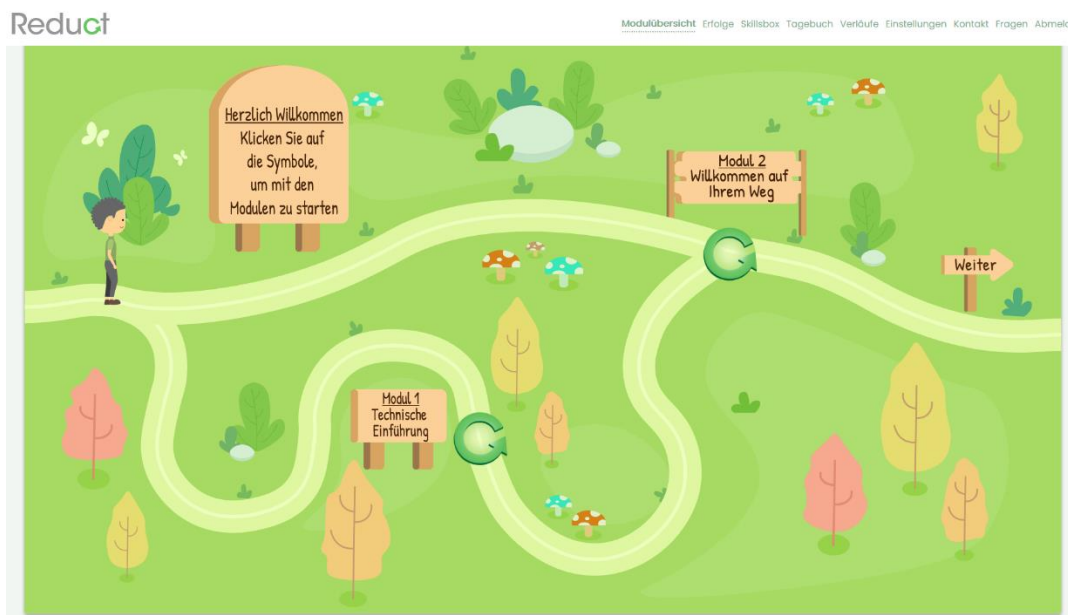

Weekly self-evaluation of current distress level, skills and mindfulness

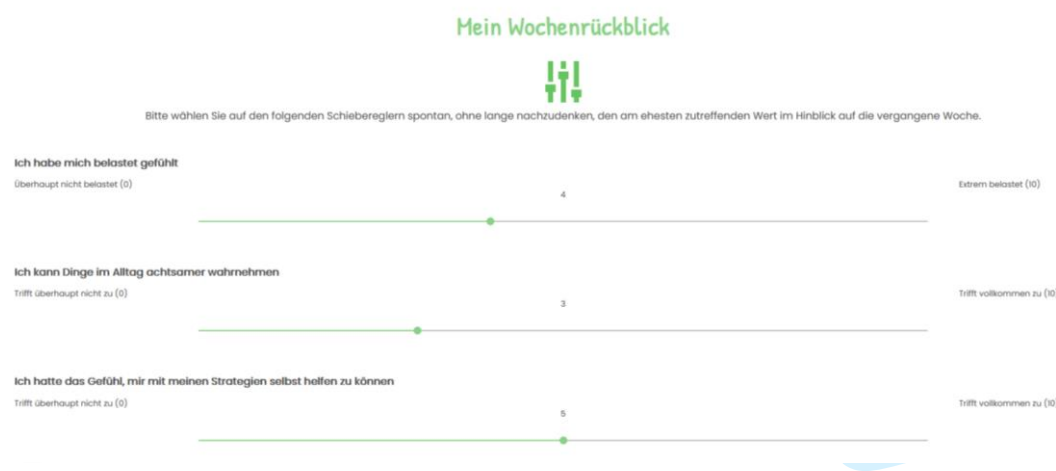

Visualization of the individual development of the self-evaluation over the weeks

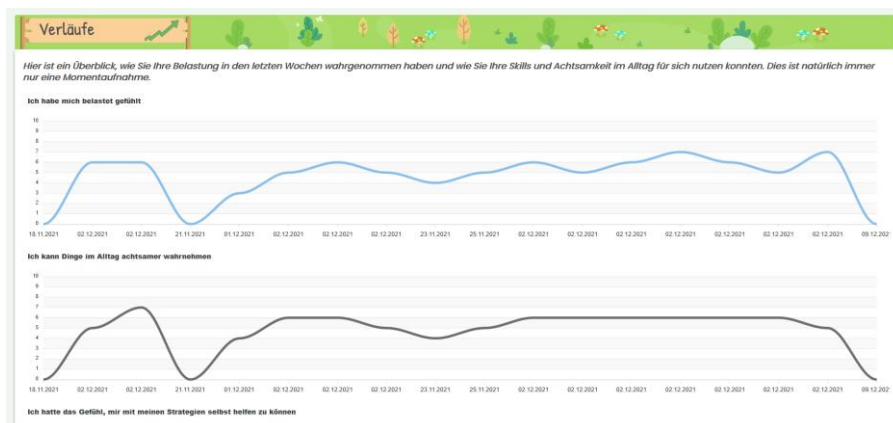

1  
2  
3  
4  
5  
6  
7 Weekly Diary  
8  
9

10  
11  
12  
13  
14  
15  
16  
17  
18  
19  
20  
21  
22  
23  
24  
25  
26  
27  
28  
29  
30

**Mein Tagebuch**



Im Verlauf des Make it Trainings dürfen Sie immer wieder Ihre Aufmerksamkeit auch auf Dinge werfen, für die Sie dankbar sind oder über die Sie sich gefreut haben. Nehmen Sie sich nun kurz Zeit, um über die folgenden beiden Fragen nachzudenken:

Worüber habe ich mich in dieser Woche gefreut?

Antwort1

Antwort1

Wofür bin ich in dieser Woche dankbar?

Antwort1

Antwort1

**Tagebuch**

*Hier können Sie die Einträge aus Ihrem Dankbarkeitstagebuch einsehen, es kann Freude bereiten sich diese immer wieder anzuschauen.*

31  
32  
33 Tutorial Videos  
34  
35  
36  
37  
38  
39  
40  
41  
42  
43  
44  
45  
46  
47  
48  
49  
50  
51  
52  
53  
54  
55  
56  
57  
58  
59  
60

**Video: Das ABC-Modell**





Optimale Qualität   Gute Qualität   Mittlere Qualität

1  
2  
3  
4  
5  
6  
7 Interactive Skills Training

8 **Übung: Mein Selbstwerthaus**

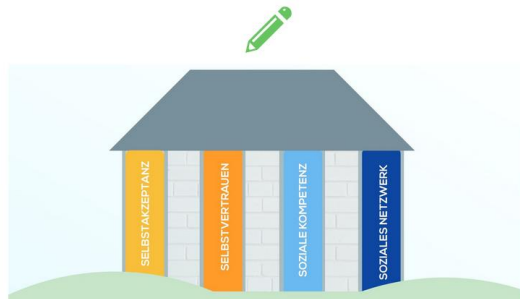

20 Überlegen Sie hierunter, welche Erlebnisse, Menschen und Eigenschaften die Säulen Ihres Selbstwerthaus bilden.

21 Selbstakzeptanz

22 Was sind ihre Stärken? Was würden  
23 andere über Sie sagen?

Selbstvertrauen

Was ist Ihnen gelungen? Welche  
Fähigkeit hat dabei geholfen?

Soziale Kompetenz

Welche sozialen Aktivitäten  
unternehmen Sie gerne?

Soziales Netz

Welche Menschen sind Ihnen wichtig?  
Mit wem sind Sie gerne zusammen?

24 Mein Selbstwerthaus herunterladen

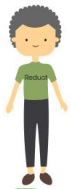

Hier finden Sie die Übung auch nochmal zum Herunterladen. Vielleicht möchten Sie Ihr Selbstwerthaus ausfüllen und irgendwo aufhängen?

32  
33  
34  
35  
36 Downloadable audio guided mindfulness exercises

37  
38  
39 **Achtsamkeitsübung: Achtsames Atmen I - Den Atem beobachten**

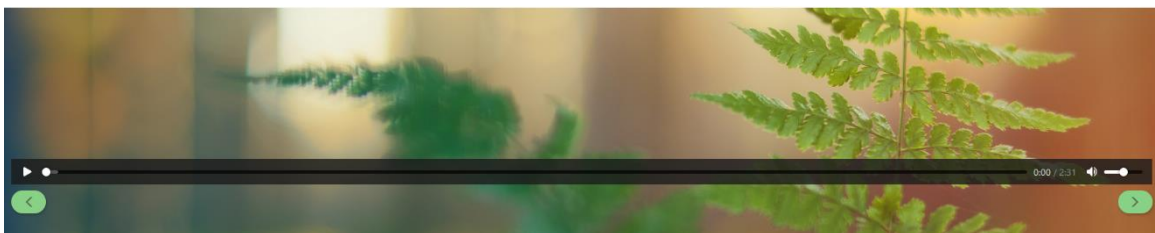

48  
49  
50 Downloadable mindfulness exercise plan



Skillsbox: Individualized collection of helpful information and exercises

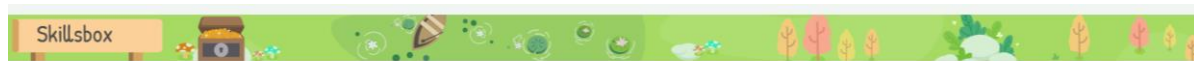

Schlaf (Donnerstag, 02.12.21)

Modul 7: Schlaf Donnerstag, 02.12.21

18 / 27

### Übung: Meine Abendroutine

Wie Herr Prof. Dr. Schöbel erläutert hat, besteht eine Möglichkeit, um besser abschalten zu können, in einer festen Abendroutine. Wir möchten Sie nun einladen, Ihre eigene Abendroutine zu gestalten.

Zu welcher Zeit möchten Sie zu Bett gehen und zu welcher Zeit möchten Sie mit dieser Routine beginnen? Welche Rituale können Ihnen dabei helfen, sich auf das Zubettgehen einzustimmen?

Meine Abendroutine

- Lesen
- Meditation/ Yoga
- Skincare

Stressmanagement (Dienstag, 07.12.21)

Modul 12: Stressmanagement Dienstag, 07.12.21

17 / 27

### Übung: Meine Mutsätze

Wir haben Ihnen eine Liste mit Mutsätzen vorbereitet. Vielleicht gefällt Ihnen der eine oder andere Satz. Oder vielleicht gibt es schon einen Satz, der Ihnen bereits in anderen Stresssituationen geholfen hat. Gerne können Sie diesen Satz auch in ein freies Feld schreiben. Die Sätze werden dann in Ihrer Skillsbox abgelegt. Wählen Sie nun bitte Ihre persönlichen Mutsätze aus.

Ich kann auf mich zählen.
