# Supplementary material for: Web-based mindfulness and skills-based distress reduction for patients with cancer: study protocol of the multicentre, randomised, controlled confirmatory intervention trial Reduct
Source: PubMed Central journal article supplement — BMJ Open. 2022 Jun 1;12(6):e056973. doi: 10.1136/bmjopen-2021-056973 (PMC9161102; doi:10.1136/bmjopen-2021-056973), 2022-06-01
Supplement: bmjopen-2021-056973supp002.pdf [file bmjopen-2021-056973supp002.pdf]

Teilnehmer-ID: \_\_\_\_\_

# Reduct- Web-Basierte Achtsamkeits- und Skillsbasierte Stressreduktion für Patientinnen und Patienten mit Krebs

## Darf der Abbruchfragebogen bei Studienabbruch verschickt werden?

Muss auf der Einwilligungserklärung angekreuzt sein

- Ja  Nein

### I. Onkologische Anamnese

#### 1) Welche Tumorerkrankung (Primär Erkrankung für den Studieneinschluss) ist aktuell bzw. in den letzten 12 Monaten aufgetreten (Hier nur eine Auswahl treffen)?

- Kopf-Hals-Tumore (C00-14, C30-33)
- Oberer GI-Trakt (C15-16)
- Darm (C17-21)
- Leber/ Gallenblase (C22-24)
- Pankreas (C25)
- Lunge (C33-34)
- Haut (C43)
- Muskuloskelettale Tumore (C40-41, C45-49)
- Brust (D05, C50)
- weibl. Genitale (C51-56)
- männl. Genitale (C60-62)

# Reduct

2

- Harnorgane (C64, C67)
- Neuroonkologische Tumore (C70-72)
- Endokrine Tumore (C73)
- Lymphatisches, blutbildendes Gewebe (C81-85, C90-95)
- Kopf-Hals-Tumore (C00-14, C30-33)
- Cancer of Unknown Primary (CUP)
- Andere, genaue Diagnosen: \_\_\_\_\_

## 2) Krankheitssituation

2.1 TNM Stadium: T \_\_\_\_\_ N \_\_\_\_\_ M \_\_\_\_\_

Falls TNM Klassifikation nicht auf Tumorerkrankung anwendbar, bitte hier das Tumorstadium spezifizieren:

2.2 Ersterkrankung, Datum der Diagnosestellung \_\_\_\_\_

2.3 Kam es zu einem Wiederauftreten der Erkrankung? (Rezidiv)

- Ja  Nein

Wann aufgetreten? \_\_\_\_\_

Wo aufgetreten?

- |                                             |                                      |                                                                              |
|---------------------------------------------|--------------------------------------|------------------------------------------------------------------------------|
| <input type="checkbox"/> Bauchspeicheldrüse | <input type="checkbox"/> Harnblase   | <input type="checkbox"/> Blut                                                |
| <input type="checkbox"/> Darm               | <input type="checkbox"/> Gallenblase | <input type="checkbox"/> Gebärmutter                                         |
| <input type="checkbox"/> Blutgefäße /Adern  | <input type="checkbox"/> Gehirn      | <input type="checkbox"/> Geschlechtsorgane<br>(Hoden, Penis, Zervix, Vagina) |
| <input type="checkbox"/> Haut               | <input type="checkbox"/> Herz        | <input type="checkbox"/> Leber                                               |
| <input type="checkbox"/> Lunge              | <input type="checkbox"/> Magen       | <input type="checkbox"/> Milz                                                |

Reduct

3

- |                                  |                                     |                                       |
|----------------------------------|-------------------------------------|---------------------------------------|
| <input type="checkbox"/> Muskeln | <input type="checkbox"/> Niere      | <input type="checkbox"/> Schilddrüse  |
| <input type="checkbox"/> Skelett | <input type="checkbox"/> Zwerchfell | <input type="checkbox"/> Andere _____ |

**2.4 Kam es zu einer Streuung des Krebses (Metastasierung)?**

- |                             |                               |
|-----------------------------|-------------------------------|
| <input type="checkbox"/> Ja | <input type="checkbox"/> Nein |
|-----------------------------|-------------------------------|

Wann aufgetreten? \_\_\_\_\_

Wo aufgetreten?

- |                                             |                                      |                                                                              |
|---------------------------------------------|--------------------------------------|------------------------------------------------------------------------------|
| <input type="checkbox"/> Bauchspeicheldrüse | <input type="checkbox"/> Harnblase   | <input type="checkbox"/> Blut                                                |
| <input type="checkbox"/> Darm               | <input type="checkbox"/> Gallenblase | <input type="checkbox"/> Gebärmutter                                         |
| <input type="checkbox"/> Blutgefäße /Adern  | <input type="checkbox"/> Gehirn      | <input type="checkbox"/> Geschlechtsorgane<br>(Hoden, Penis, Zervix, Vagina) |
| <input type="checkbox"/> Haut               | <input type="checkbox"/> Herz        | <input type="checkbox"/> Leber                                               |
| <input type="checkbox"/> Lunge              | <input type="checkbox"/> Magen       | <input type="checkbox"/> Milz                                                |
| <input type="checkbox"/> Muskeln            | <input type="checkbox"/> Niere       | <input type="checkbox"/> Schilddrüse                                         |
| <input type="checkbox"/> Skelett            | <input type="checkbox"/> Zwerchfell  | <input type="checkbox"/> Andere _____                                        |

**3) Aktuelle Therapiesituation (Hier nur eine Auswahl treffen):**

- Akuttherapie
- Nachsorge
- Erhaltungstherapie
- Keine

**4) Letztes Erkrankungsstadium unter Therapie**

- Komplette Remission (CR)
- Partielle Remission (PR)
- Stabile Erkrankung (SD)
- Progression (PD)

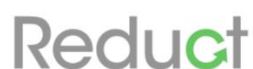

### 5) Therapieform: Welche wurden oder werden aktuell angewendet?

|                         | Aktuell                  | Abgeschlossen in den letzten 12 Monaten | Vorher abgeschlossen     |
|-------------------------|--------------------------|-----------------------------------------|--------------------------|
| Operation               | <input type="checkbox"/> | <input type="checkbox"/>                | <input type="checkbox"/> |
| Strahlentherapie        | <input type="checkbox"/> | <input type="checkbox"/>                | <input type="checkbox"/> |
| Chemotherapie           | <input type="checkbox"/> | <input type="checkbox"/>                | <input type="checkbox"/> |
| Antihormonelle Therapie | <input type="checkbox"/> | <input type="checkbox"/>                | <input type="checkbox"/> |
| Immuntherapie           | <input type="checkbox"/> | <input type="checkbox"/>                | <input type="checkbox"/> |
| Supportivtherapie       | <input type="checkbox"/> | <input type="checkbox"/>                | <input type="checkbox"/> |
| Zelltherapie            | <input type="checkbox"/> | <input type="checkbox"/>                | <input type="checkbox"/> |
| Stammzelltherapie       | <input type="checkbox"/> | <input type="checkbox"/>                | <input type="checkbox"/> |
| Keine                   | <input type="checkbox"/> | <input type="checkbox"/>                | <input type="checkbox"/> |
| Sonstige                | <input type="checkbox"/> | <input type="checkbox"/>                | <input type="checkbox"/> |

## II. Psychosomatische Anamnese

### 1) Liegt oder lag eine psychische Begleiterkrankung vor

Nein

|                                            | Aktuell                  | Zustand nach             |
|--------------------------------------------|--------------------------|--------------------------|
| Alkoholismus (F10.2)                       | <input type="checkbox"/> | <input type="checkbox"/> |
| Bipolare Affektive Störung (F31)           | <input type="checkbox"/> | <input type="checkbox"/> |
| Depressive Episode (F32)                   | <input type="checkbox"/> | <input type="checkbox"/> |
| Rezidivierende Depressive Störung (F33)    | <input type="checkbox"/> | <input type="checkbox"/> |
| Panikstörung (F41.0)                       | <input type="checkbox"/> | <input type="checkbox"/> |
| Generalisierte Angststörung (F41.1)        | <input type="checkbox"/> | <input type="checkbox"/> |
| Zwangsstörung (F42)                        | <input type="checkbox"/> | <input type="checkbox"/> |
| Posttraumatische Belastungsstörung (F43.1) | <input type="checkbox"/> | <input type="checkbox"/> |
| Anpassungsstörung (F43.2)                  | <input type="checkbox"/> | <input type="checkbox"/> |
| Essstörung (F50)                           | <input type="checkbox"/> | <input type="checkbox"/> |



# Reduct

5

Andere, nämlich (Bezeichnung und ICD Code angeben): \_\_\_\_\_   Ja, und zwar:

## 2) Aktuelle Einnahme von Psychopharmaka:

- Nein
- Ja, folgende: \_\_\_\_\_
- Dosis \_\_\_\_\_
- Seit wann? \_\_\_\_\_
- Stabile Dosis  Ja  Nein

## 3) Aktuelle oder vergangene psychotherapeutische/psychosomatische/psychiatrische Behandlung:

- Keine
- Ja, folgende:
- |                                    | Aktuell                  | Abgeschlossen innerhalb der letzten 12 Monate | Vorher abgeschlossen                |
|------------------------------------|--------------------------|-----------------------------------------------|-------------------------------------|
| Psychoonkologische Behandlung      | <input type="checkbox"/> | <input type="checkbox"/>                      | <input type="checkbox"/>            |
| Ambulante Psychotherapie           | <input type="checkbox"/> | <input type="checkbox"/>                      | <input type="checkbox"/>            |
| Psychosomatischer Klinikaufenthalt | <input type="checkbox"/> | <input type="checkbox"/>                      | <input type="checkbox"/>            |
| Psychiatrischer Klinikaufenthalt   | <input type="checkbox"/> | <input type="checkbox"/>                      | <input checked="" type="checkbox"/> |

Reduct

6

Andere

### III. Gesundheitsökonomische Fragen

#### 1. Lag bei Ihnen innerhalb der letzten 3 Monate eine Arbeitsunfähigkeit (AU) vor?

 nein ja

wenn ja, bitte geben Sie den Zeitraum jeder AU mit Datum an und fassen dabei die Dauer für jede zusammenhängende AU (Folgebescheinigungen) wegen derselben Erkrankung zusammen.

1. AU: von \_\_.\_\_.\_\_\_\_(TT.MM.JJJJ) bis \_\_.\_\_.\_\_\_\_(TT.MM.JJJJ)

2. AU: von \_\_.\_\_.\_\_\_\_(TT.MM.JJJJ) bis \_\_.\_\_.\_\_\_\_(TT.MM.JJJJ)

3. AU: von \_\_.\_\_.\_\_\_\_(TT.MM.JJJJ) bis \_\_.\_\_.\_\_\_\_(TT.MM.JJJJ)

4. AU: von \_\_.\_\_.\_\_\_\_(TT.MM.JJJJ) bis \_\_.\_\_.\_\_\_\_(TT.MM.JJJJ)

5. AU: von \_\_.\_\_.\_\_\_\_(TT.MM.JJJJ) bis \_\_.\_\_.\_\_\_\_(TT.MM.JJJJ)

#### 2. Bezogen Sie in den letzten 3 Monaten bzw. beziehen Sie aktuell Krankengeld?

 nein ja

wenn ja, geben Sie bitte den Zeitraum des Krankengeldbezugs an:

von \_\_.\_\_.\_\_\_\_(TT.MM.JJJJ) bis \_\_.\_\_.\_\_\_\_(TT.MM.JJJJ)

#### 3. Hatten Sie innerhalb der letzten 3 Monate Kontakt mit einer ambulanten Arztpraxis (inkl. Rezept/Überweisung abholen, Blutabnahme, telefonische Beratung, Impfung und Hausbesuch)? Bitte beziehen Sie Arztkontakte im Rahmen der Reduct-Studie nicht ein.

 nein ja, welche: Hausärztin/ Hausarzt Anzahl Besuche: \_\_\_\_ Augenärztin/ Augenarzt Anzahl Besuche: \_\_\_\_ Chirurgin/ Chirurg: Anzahl Besuche: \_\_\_\_ Gynäkologin/Gynäkologe: Anzahl Besuche: \_\_\_\_

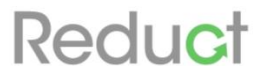

- Hautärztin/ Hautarzt: Anzahl Besuche: \_\_\_\_
- HNO-Ärztin/ HNO-Arzt: Anzahl Besuche: \_\_\_\_
- psychiatrische Institutsambulanz (PIA) und ambulante Kontakte im psychiatrischen/ psychosomatischen Krankenhaus Anzahl Besuche: \_\_\_\_
- Internistin/ Internist (z.B. Onkologin/Onkologe, Kardiologin/ Kardiologe, Gastroenterologin/ Gastroenterologe, Nephrologin/Nephrologe, Diabetologin/Diabetologe, Pulmologin/Pulmologe, usw.) Anzahl Besuche: \_\_\_\_
- Neurologin/ Neurologe: Anzahl Besuche: \_\_\_\_
- Orthopädin/ Orthopäde: Anzahl Besuche: \_\_\_\_
- Psychiaterin/ Psychiater: Anzahl Besuche: \_\_\_\_
- Psychotherapeutin/ Psychotherapeut: Anzahl Besuche: \_\_\_\_
- Psychosomatikerin/ Psychosomatiker: Anzahl Besuche: \_\_\_\_
- Psychoonkologische Behandlung Anzahl Besuche: \_\_\_\_
- Urologin/ Urologe: Anzahl Besuche: \_\_\_\_
- Radiologin/ Radiologe: Anzahl Besuche: \_\_\_\_
- Zahnärztin/ Zahnarzt: Anzahl Besuche: \_\_\_\_
- Andere Fachgebiete: \_\_\_\_\_ Anzahl Besuche: \_\_\_\_
- Andere Fachgebiete: \_\_\_\_\_ Anzahl Besuche: \_\_\_\_
- Andere Fachgebiete: \_\_\_\_\_ Anzahl Besuche: \_\_\_\_

#### 4. Hatten Sie einen Krankenhausaufenthalt innerhalb der letzten 3 Monate?

- nein
- ja

wenn ja, geben Sie bitte den Zeitraum des Krankenhausaufenthaltes an und machen Angaben zur Abteilung und Unterbringungsform (sollte sich eine teilstationäre Behandlung an eine stationäre Behandlung angeschlossen haben, werten Sie diese bitte als zwei unterschiedliche Aufenthalte und kreuzen Sie pro Aufenthalt nur „Stationär“ oder „Teilstationär“ an):

Aufenthalt 1 von \_\_.\_\_.\_\_\_\_(TT.MM.JJJJ) bis \_\_.\_\_.\_\_\_\_(TT.MM.JJJJ)

- Psychiatrisch-psychotherapeutische Behandlung
- Psychosomatisch-psychotherapeutische Behandlung
- Stationär
- Teilstationär (Tages-/Nachklinik)
- andere Abteilungen (primär körperliche Erkrankungen/Behandlungen)

Aufenthalt 2 von \_\_.\_\_.\_\_\_\_(TT.MM.JJJJ) bis \_\_.\_\_.\_\_\_\_(TT.MM.JJJJ)

- Psychiatrisch-psychotherapeutische Behandlung
- Psychosomatisch-psychotherapeutische Behandlung



- Stationär
- Teilstationär (Tages-/Nachklinik)
- andere Abteilungen (primär körperliche Erkrankungen/Behandlungen)

Aufenthalt 3 von \_\_.\_\_.\_\_\_\_(TT.MM.JJJJ) bis \_\_.\_\_.\_\_\_\_(TT.MM.JJJJ)

- Psychiatrisch-psychotherapeutische Behandlung
- Psychosomatisch-psychotherapeutische Behandlung
- Stationär
- Teilstationär (Tages-/Nachklinik)
- andere Abteilungen (primär körperliche Erkrankungen/Behandlungen)

**5. Haben Sie innerhalb der letzten 3 Monate an einer Rehabilitations-Maßnahme teilgenommen?**

- nein
- ja

wenn ja, geben Sie bitte den Zeitraum des Reha-Aufenthaltes an und machen Angaben zum Grund des Aufenthaltes, zur Abteilung und zur Unterbringungsform:

Aufenthalt 1 von \_\_.\_\_.\_\_\_\_(TT.MM.JJJJ) bis \_\_.\_\_.\_\_\_\_(TT.MM.JJJJ)

- andere Abteilungen (primär körperliche Erkrankungen/ Behandlungen)
- wegen einer sonstigen psychischen Erkrankung
- Stationär
- Teilstationär (Tages-/Nachklinik)

Aufenthalt 2 von \_\_.\_\_.\_\_\_\_(TT.MM.JJJJ) bis \_\_.\_\_.\_\_\_\_(TT.MM.JJJJ)

- andere Abteilungen (primär körperliche Erkrankungen/ Behandlungen)
- wegen einer sonstigen psychischen Erkrankung
- Stationär
- Teilstationär (Tages-/Nachklinik)

**6. Haben Sie innerhalb der letzten 3 Monate Medikamente eingenommen?**

- nein  ja

wenn ja, geben Sie bitte den Medikamentennamen/Wirkstoff an, die Ihnen von einem Arzt verordnet wurden, die Dosis pro Tag und die Einnahmedauer an:

1. Medikament: \_\_\_\_\_ Tagesdosis: \_\_\_\_\_

Einnahme von \_\_.\_\_.\_\_\_\_(TT.MM.JJJJ) bis \_\_.\_\_.\_\_\_\_(TT.MM.JJJJ), ganzer Zeitraum

2. Medikament: \_\_\_\_\_ Tagesdosis: \_\_\_\_\_

# Reduct

9

Einnahme von \_\_\_\_ (TT.MM.JJJJ) bis \_\_\_\_ (TT.MM.JJJJ), ganzer Zeitraum

3. Medikament: \_\_\_\_\_ Tagesdosis: \_\_\_\_\_

Einnahme von \_\_\_\_ (TT.MM.JJJJ) bis \_\_\_\_ (TT.MM.JJJJ), ganzer Zeitraum

4. Medikament: \_\_\_\_\_ Tagesdosis: \_\_\_\_\_

Einnahme von \_\_\_\_ (TT.MM.JJJJ) bis \_\_\_\_ (TT.MM.JJJJ), ganzer Zeitraum

5. Medikament: \_\_\_\_\_ Tagesdosis: \_\_\_\_\_

Einnahme von \_\_\_\_ (TT.MM.JJJJ) bis \_\_\_\_ (TT.MM.JJJJ), ganzer Zeitraum

6. Medikament: \_\_\_\_\_ Tagesdosis: \_\_\_\_\_

Einnahme von \_\_\_\_ (TT.MM.JJJJ) bis \_\_\_\_ (TT.MM.JJJJ), ganzer Zeitraum



**7. Haben Sie innerhalb der letzten 3 Monate Heilmittel in Anspruch genommen (z.B. Physiotherapie, Logopädie, Ergotherapie)?**

nein

ja

Physiotherapie: Anzahl Besuche: \_\_\_\_

Logopädie: Anzahl Besuche: \_\_\_\_

Ergotherapie/Arbeitstherapie: Anzahl Besuche: \_\_\_\_

Soziotherapie: Anzahl Besuche: \_\_\_\_

Tanztherapie/Bewegungstherapie: Anzahl Besuche: \_\_\_\_

Einzel  Gruppe

Kreativtherapie: Anzahl Besuche: \_\_\_\_

Einzel  Gruppe

Kunsttherapie: Anzahl Besuche: \_\_\_\_

Einzel  Gruppe

Musiktherapie: Anzahl Besuche: \_\_\_\_

Einzel  Gruppe

Theatertherapie: Anzahl Besuche: \_\_\_\_

Einzel  Gruppe

Entspannungstechniken (autogenes Training) /progressive Muskelentspannung): Anzahl Besuche: \_\_\_\_

Einzel  Gruppe

sonstige, und zwar: \_\_\_\_\_ Anzahl Besuche: \_\_\_\_

Einzel  Gruppe



## 8. Haben Sie innerhalb der letzten 3 Monate folgende Angebote in Anspruch genommen?

**(Nicht im Rahmen eines ambulanten Arzt-/Psychotherapeutenkontaktes oder Krankenhauskontakts)**

- Psychoonkologische Beratungsstelle:  
Anzahl Kontakte: \_\_\_ durchschnittliche Dauer pro Kontakt: \_\_\_\_\_ Minuten
- Beratungsstelle bei psychischen Problemen:  
Anzahl Kontakte: \_\_\_ durchschnittliche Dauer pro Kontakt: \_\_\_\_\_ Minuten
- Sozialpsychiatrischer Dienst/Psychosozialer Krisendienst:  
Anzahl Kontakte: \_\_\_ durchschnittliche Dauer pro Kontakt: \_\_\_\_\_ Minuten
- Tagesstätten/Kontaktstätten für Menschen mit psychischen Problemen:  
Anzahl Kontakte: \_\_\_ durchschnittliche Dauer pro Kontakt: \_\_\_\_\_ Minuten
- Selbsthilfegruppen aufgrund psychischer Probleme:  
Anzahl Kontakte: \_\_\_ durchschnittliche Dauer pro Kontakt: \_\_\_\_\_ Minuten
- weitere Angebote aufgrund psychischer Probleme (z.B. Sorgentelefon)  
und zwar: \_\_\_\_\_  
Anzahl Kontakte: \_\_\_ durchschnittliche Dauer pro Kontakt: \_\_\_\_\_ Minuten

## 9. Bitte geben Sie an, ob bei Ihnen aktuell ein **Pflegegrad** vorliegt.

- nein
- ja, seit \_\_\_\_\_
- Pflegegrad 1
  - Pflegegrad 2
  - Pflegegrad 3
  - Pflegegrad 4
  - Pflegegrad 5

## 10. Bitte geben Sie an, ob Sie Leistungen der Pflegekasse beziehen.

- nein
- ja
- Pflegegeld für häusliche Pflege
  - Pflegesachleistungen für häusliche Pflege

- kombinierte Pflegegeld und Pflegesachleistung
- Entlastungsbetrag bei häuslicher Pflege
- Wohnumfeld verbessernde Maßnahmen
- Pflegesachleistungen für teilstationäre Pflege
- Pflegesachleistungen für vollstationäre Pflege
- zum Verbrauch bestimmte Pflegehilfsmittel

#### IV. Ihr derzeitiges Befinden

Bitte beantworten Sie im Folgenden, wie sehr die jeweilige Aussage in der letzten Woche auf Sie zutraf.

1.1. Ich fühle mich angespannt oder überreizt.

- 3 meistens
- 2 oft
- 1 von Zeit zu Zeit/ gelegentlich
- 0 überhaupt nicht

1.2. Ich fühle mich in meinen Aktivitäten gebremst.

- 3 fast immer
- 2 sehr oft
- 1 manchmal
- 0 überhaupt nicht

1.3. Ich kann mich heute noch so freuen wie früher.

- 0 ganz genau so
- 1 nicht ganz so sehr
- 2 Nur noch ein wenig
- 3 kaum oder gar nicht

1.4. Ich habe manchmal ein ängstliches Gefühl in der Magengegend.

- 0 überhaupt nicht
- 1 gelegentlich
- 2 ziemlich oft
- 3 sehr oft

1.5. Mich überkommt eine ängstliche Vorahnung, dass etwas Schreckliches passieren könnte.

- 3 ja, sehr stark
- 2 ja, aber nicht allzu stark
- 1 etwas, aber es macht mir keine Sorgen
- 0 überhaupt nicht

1.6. Ich habe das Interesse an meiner äußeren Erscheinung verloren.

- 3 ja, stimmt genau
- 2 ich kümmere mich nicht so sehr darum, wie ich sollte
- 1 möglicherweise kümmere ich mich zu wenig darum



0 ich kümmere mich so viel darum wie immer

1.7. Ich kann lachen und die lustige Seite der Dinge sehen.

- 0 ja, so viel wie immer
- 1 nicht mehr ganz so viel
- 2 inzwischen viel weniger
- 3 überhaupt nicht

1.8. Ich fühle mich rastlos, muss immer in Bewegung sein.

- 3 ja, tatsächlich sehr
- 2 ziemlich
- 1 nicht sehr
- 0 überhaupt nicht

1.9. Mir gehen beunruhigende Gedanken durch den Kopf.

- 3 einen Großteil der Zeit
- 2 verhältnismäßig oft
- 1 von Zeit zu Zeit, aber nicht allzu oft
- 0 nur gelegentlich/nie

1.10. Ich blicke mit Freude in die Zukunft.

- 0 ja, sehr
- 1 eher weniger als früher
- 2 viel weniger als früher
- 3 kaum bis gar nicht

1.11. Ich fühle mich glücklich.

- 3 überhaupt nicht
- 2 selten
- 1 manchmal
- 0 meistens

1.12. Mich überkommt plötzlich ein panikartiger Zustand.

- 3 ja, tatsächlich sehr oft
- 2 ziemlich oft
- 1 nicht sehr oft
- 0 überhaupt nicht

1.13. Ich kann behaglich dasitzen und mich entspannen.

- 0 ja, natürlich
- 1 gewöhnlich schon
- 2 nicht oft
- 3 überhaupt nicht

1.14. Ich kann mich an einem guten Buch, einer Radio- oder Fernsehsendung erfreuen.

- 0 oft
- 1 manchmal
- 2 Eher selten
- 3 Sehr selten

Reduct

14

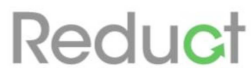

1

Teilnehmer-ID: \_\_\_\_\_

## Reduct- Web-Basierte Achtsamkeits- und Skillsbasierte Stressreduktion für Patientinnen und Patienten mit Krebs

Liebe Teilnehmerin, lieber Teilnehmer,

wir freuen uns, dass Sie uns bei unserer Studie unterstützen. Im Folgenden werden Sie nun einen Fragebogen ausfüllen, mit dessen Hilfe wir Daten zur Ihrer Lebenssituation, Ihr psychisches Befinden, Ihre Einstellung zu digitalen Gesundheitsanwendungen sowie Ihre Nutzung von digitalen Technologien allgemein erheben. Wir bitten Sie daher die folgenden Fragen möglichst genau zu beantworten. Der Fragebogen wird ca. 15-20 Minuten Ihrer Zeit in Anspruch nehmen.

Nachdem Sie unseren Fragebogen bearbeitet haben, werden Sie weitere Informationen sowie ihre Zugangsdaten für die Web-App erhalten.

Sollten Sie Fragen haben, können Sie gerne jederzeit eine E-Mail an [reduct@uni-due.de](mailto:reduct@uni-due.de) senden.

Wenn Sie merken, dass Sie sich sehr belastet fühlen und Sie mehr Unterstützung bei der Bewältigung Ihrer Erkrankung benötigen, können Sie sich jederzeit an die/den Studienverantwortliche/n Ihres Zentrums [1] wenden. Diese/r kann Ihnen bei der Suche psychoonkologischer Hilfsangebote zur Seite stehen.

Wir wünschen Ihnen weiterhin alles Gute und danken Ihnen für das Ausfüllen des Fragebogens

Ihr Reduct Team

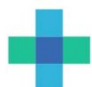

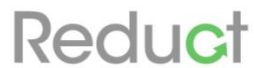

\*Kontakt Daten

[2]

**I. Fragen zu Soziodemographischen Daten**

**1.1. Füllen Sie den Fragebogen gerade im Rahmen einer stationären Behandlung aus?**

ja  nein

**1.2. Geschlecht:**

weiblich  männlich  inter/ divers

**1.3. Alter:**

\_\_\_\_\_ Jahre

**1.4. Familienstand**

- ledig
- verheiratet
- in Partnerschaft lebend
- geschieden/ getrennt
- verwitwet
- sonstiges (bitte nennen) \_\_\_\_\_

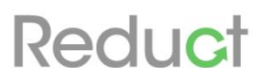**1.5. Wie viele Personen leben in Ihrem Haushalt?**

- 1 Person
- 2 Personen
- 3 Personen
- 4 Personen
- 5 Personen
- mehr als 5 Personen, nämlich: \_\_\_\_\_

**1.6. Haben Sie Kinder?**

- ja
- nein

**1.7. Leben Kinder dauerhaft in Ihrem Haushalt, die von Ihnen versorgt werden?**

- ja
- nein

**1.8. Bitte geben Sie an, in welcher Art Stadt oder Gemeinde Sie wohnen:**

- Großstadt (ab 100.000 Einwohner)
- Mittelstadt (ab 20.000 Einwohner)
- Kleinstadt (ab 5.000 Einwohner)
- Landgemeinde (unter 5.000 Einwohner)

**1.9. Bitte geben Sie Ihren höchsten Bildungsabschluss an:**

- abgeschlossenes (Fach-) Hochschulstudium
- Fachabitur/Abitur
- Realschulabschluss

# Reduct

4

- Hauptschule/ Volksschule
- kein Schlussabschluss
- sonstiges (bitte nennen) \_\_\_\_\_

**1.10. Bitte geben Sie an, welcher Beschäftigungsstatus auf Sie zutrifft.**

- noch in Ausbildung (Ausbildung, Studium etc.)
  - wenn ja:
    - Aktiv, keine längere Unterbrechungen aufgrund der Erkrankung
    - Derzeit krankgeschrieben/ Urlaubssemester

- Erwerbstätig
  - wenn ja:
    - Teilzeitbeschäftigt
    - Vollzeitbeschäftigt
    - geringfügig beschäftigt (Minijob)
    - Zeitarbeit
    - Sonstiges (bitte nennen) \_\_\_\_\_

- nicht erwerbstätig
  - wenn ja:
    - derzeit krankgeschrieben
    - berufsunfähig, wenn zutreffend:
      - wenn ja:  seit der Krebserkrankung  schon vorher
    - berentet/pensioniert
    - Sonstiges (bitte nennen) \_\_\_\_\_

**1.11. Ist/war Ihre finanzielle Situation durch Ihre Krebserkrankung belastet?**

1  
Nicht  
belastet

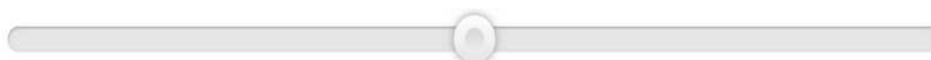

10  
Sehr  
belastet

**1.12. Wie schätzen Sie Ihre finanzielle Situation ein?**1  
Schlecht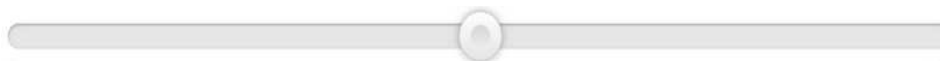10  
Gut

Da wir messen wollen, ob und wie das Reduct-Angebot von allen Bevölkerungsgruppen, also ebenfalls von Migranten und ausländischen Mitbürgern, angenommen wird, stellen wir Ihnen Fragen zur Nationalität.

**1.13. Besitzen Sie die deutsche Staatsangehörigkeit?**

- ja  nein

Wenn ja:

- seit Geburt  
 seit \_\_\_\_\_ (bitte, Jahreszahl einsetzen)

**1.14 Besitzen/besaßen Ihre Eltern beide die deutsche Staatsangehörigkeit seit der Geburt?**

- ja  nein

**2. Belastungsthermometer**

Bitte markieren Sie am Thermometer die Zahl, die am besten beschreibt, wie belastet Sie sich in der letzten Woche einschließlich heute gefühlt haben.

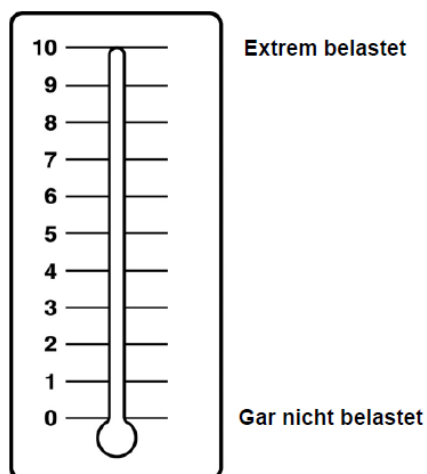

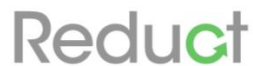

### 3. Skala zur Allgemeinen Selbstwirksamkeitserwartung

Kreuzen Sie bitte bei jeder Frage die Antwort an, die am besten auf Sie zutrifft.

|                                                                                                    | Stimmt<br>nicht | Stimmt<br>kaum | Stimmt<br>eher | Stimmt<br>genau |
|----------------------------------------------------------------------------------------------------|-----------------|----------------|----------------|-----------------|
| 3.1. Wenn sich Widerstände auftun, finde ich Mittel und Wege, mich durchzusetzen.                  | 1               | 2              | 3              | 4               |
| 3.2. Die Lösung schwieriger Probleme gelingt mir immer, wenn ich mich darum bemühe.                | 1               | 2              | 3              | 4               |
| 3.3. Es bereitet mir keine Schwierigkeiten, meine Absichten und Ziele zu verwirklichen.            | 1               | 2              | 3              | 4               |
| 3.4. In unerwarteten Situationen weiß ich immer, wie ich mich verhalten soll.                      | 1               | 2              | 3              | 4               |
| 3.5. Auch bei überraschenden Ereignissen glaube ich, dass ich gut mit ihnen zurechtkommen kann.    | 1               | 2              | 3              | 4               |
| 3.6. Schwierigkeiten sehe ich gelassen entgegen, weil ich meinen Fähigkeiten immer vertrauen kann. | 1               | 2              | 3              | 4               |
| 3.7. Was auch immer passiert, ich werde schon klarkommen.                                          | 1               | 2              | 3              | 4               |
| 3.8. Für jedes Problem kann ich eine Lösung finden.                                                | 1               | 2              | 3              | 4               |
| 3.9. Wenn eine neue Sache auf mich zukommt, weiß ich, wie ich damit umgehen kann.                  | 1               | 2              | 3              | 4               |
| 3.10. Wenn ein Problem auftaucht, kann ich es aus eigener Kraft meistern.                          | 1               | 2              | 3              | 4               |



The logo for Reduct, with the word 'Reduct' in a grey sans-serif font and the letter 't' in a green color.

7

#### 4. Lebensqualität (EORT-QLQ-C30)

Bitte kreuzen Sie im Folgenden Abschnitt die Zahl von 1 bis 4 an, die am besten auf Sie zutrifft.

# Reduct

8

|                                                                                                                                      | Überhaupt<br>nicht | Wenig | Mäßig | Sehr |
|--------------------------------------------------------------------------------------------------------------------------------------|--------------------|-------|-------|------|
| 4.1. Bereitet es Ihnen Schwierigkeiten, sich körperlich anzustrengen (z.B. eine schwere Einkaufstasche oder einen Koffer zu tragen)? | 1                  | 2     | 3     | 4    |
| 4.2. Bereitet es Ihnen Schwierigkeiten, einen <u>längeren</u> Spaziergang zu machen?                                                 | 1                  | 2     | 3     | 4    |
| 4.3. Bereitet es Ihnen Schwierigkeiten, eine <u>kurze</u> Strecke außer Haus zu gehen?                                               | 1                  | 2     | 3     | 4    |
| 4.4. Müssen Sie tagsüber im Bett liegen oder in einem Sessel sitzen?                                                                 | 1                  | 2     | 3     | 4    |
| 4.5. Brauchen Sie Hilfe beim Essen, Anziehen, Waschen oder Benutzen der Toilette?                                                    | 1                  | 2     | 3     | 4    |
| <b>Während der letzten Woche:</b>                                                                                                    |                    |       |       |      |
|                                                                                                                                      | Überhaupt<br>nicht | Wenig | Mäßig | Sehr |
| 4.6. Waren Sie bei Ihrer Arbeit oder bei anderen tagtäglichen Beschäftigungen eingeschränkt?                                         | 1                  | 2     | 3     | 4    |
| 4.7. Waren Sie bei Ihren Hobbys oder andere Freizeitbeschäftigungen eingeschränkt?                                                   | 1                  | 2     | 3     | 4    |
| 4.8. Waren Sie kurzatmig?                                                                                                            | 1                  | 2     | 3     | 4    |
| 4.9. Hatten Sie Schmerzen?                                                                                                           | 1                  | 2     | 3     | 4    |
| 4.10. Mussten Sie sich ausruhen?                                                                                                     | 1                  | 2     | 3     | 4    |

# Reduct

9

|                                                                                                                   |                        |              |              |             |
|-------------------------------------------------------------------------------------------------------------------|------------------------|--------------|--------------|-------------|
| 4.11. Hatten Sie Schlafstörungen?                                                                                 | 1                      | 2            | 3            | 4           |
| 4.12. Fühlten Sie sich schwach?                                                                                   | 1                      | 2            | 3            | 4           |
| <b>Während der letzten Woche:</b>                                                                                 | <b>Überhaupt nicht</b> | <b>Wenig</b> | <b>Mäßig</b> | <b>Sehr</b> |
| 4.13. Hatten Sie Appetitmangel?                                                                                   | 1                      | 2            | 3            | 4           |
| 4.14. War Ihnen übel?                                                                                             | 1                      | 2            | 3            | 4           |
| 4.15. Haben Sie erbrochen?                                                                                        | 1                      | 2            | 3            | 4           |
| 4.16. Hatten Sie Verstopfung?                                                                                     | 1                      | 2            | 3            | 4           |
| 4.17. Hatten Sie Durchfall?                                                                                       | 1                      | 2            | 3            | 4           |
| 4.18. Waren Sie müde?                                                                                             | 1                      | 2            | 3            | 4           |
| 4.19. Fühlten Sie sich durch Schmerzen in Ihrem alltäglichen Leben beeinträchtigt?                                | 1                      | 2            | 3            | 4           |
| 4.20. Hatten Sie Schwierigkeiten, sich auf etwas zu konzentrieren, z.B. auf das Zeitungslesen oder das Fernsehen? | 1                      | 2            | 3            | 4           |
| 4.21. Fühlten Sie sich angespannt?                                                                                | 1                      | 2            | 3            | 4           |
| 4.22. Haben Sie sich Sorgen gemacht?                                                                              | 1                      | 2            | 3            | 4           |
| 4.23. Waren Sie reizbar?                                                                                          | 1                      | 2            | 3            | 4           |
| 4.24. Fühlten Sie sich niedergeschlagen?                                                                          | 1                      | 2            | 3            | 4           |
| 4.25. Hatten Sie Schwierigkeiten, sich an Dinge zu erinnern?                                                      | 1                      | 2            | 3            | 4           |





## 5. Lebensqualität (EQ-5D-5L)

Bitte kreuzen Sie unter jeder Überschrift das Kästchen an, das Ihren Gesundheitszustand heute am besten beschreibt.

### 5.1. Beweglichkeit/Mobilität

|                                         |   |
|-----------------------------------------|---|
| Ich habe keine Probleme herumzugehen    | 1 |
| Ich habe leichte Probleme herumzugehen  | 2 |
| Ich habe mäßige Probleme herumzugehen   | 3 |
| Ich habe große Probleme herumzugehen    | 4 |
| Ich bin nicht in der Lage, herumzugehen | 5 |

### 5.2. Für sich selbst sorgen

|                                                                   |   |
|-------------------------------------------------------------------|---|
| Ich habe keine Probleme, mich selbst zu waschen oder anzuziehen   | 1 |
| Ich habe leichte Probleme, mich selbst zu waschen oder anzuziehen | 2 |
| Ich habe mäßige Probleme, mich selbst zu waschen oder anzuziehen  | 3 |
| Ich habe große Probleme, mich selbst zu waschen oder anzuziehen   | 4 |
| Ich bin nicht in der Lage, mich selbst zu waschen oder anzuziehen | 5 |

### 5.3. Alltägliche Tätigkeiten (z.B. Arbeit, Studium, Hausarbeit, Familien- oder Freizeitaktivitäten)

|                                                                        |   |
|------------------------------------------------------------------------|---|
| Ich habe keine Probleme, meinen alltäglichen Tätigkeiten nachzugehen   | 1 |
| Ich habe leichte Probleme, meinen alltäglichen Tätigkeiten nachzugehen | 2 |
| Ich habe mäßige Probleme, meinen alltäglichen Tätigkeiten nachzugehen  | 3 |
| Ich habe große Probleme, meinen alltäglichen Tätigkeiten nachzugehen   | 4 |
| Ich bin nicht in der Lage, meinen alltäglichen Tätigkeiten nachzugehen | 5 |

# Reduct

12

## 5.4. Schmerzen/Körperliche Beschwerden

|                                             |   |
|---------------------------------------------|---|
| Ich habe keine Schmerzen oder Beschwerden   | 1 |
| Ich habe leichte Schmerzen oder Beschwerden | 2 |
| Ich habe mäßige Schmerzen oder Beschwerden  | 3 |
| Ich habe starke Schmerzen oder Beschwerden  | 4 |
| Ich habe extreme Schmerzen oder Beschwerden | 5 |

## 5.5. Angst/Niedergeschlagenheit

|                                             |   |
|---------------------------------------------|---|
| Ich bin nicht ängstlich oder deprimiert     | 1 |
| Ich bin ein wenig ängstlich oder deprimiert | 2 |
| Ich bin mäßig ängstlich oder deprimiert     | 3 |
| Ich bin sehr ängstlich oder deprimiert      | 4 |
| Ich bin extrem ängstlich oder deprimiert    | 5 |

## Reduct

5.6. Um Sie bei der Einschätzung, wie gut oder wie schlecht Ihr Gesundheitszustand ist, zu unterstützen, haben wir eine Skala gezeichnet, ähnlich einem Thermometer. Der best denkbare Gesundheitszustand ist mit einer "100" gekennzeichnet, der schlechteste mit "0".

Wir möchten Sie nun bitten, auf dieser Skala zu kennzeichnen, wie gut oder schlecht Ihrer Ansicht nach Ihr persönlicher Gesundheitszustand heute ist. Bitte verbinden Sie dazu den untenstehenden Kasten mit dem Punkt auf der Skala, der Ihren heutigen Gesundheitszustand am besten wiedergibt.

**Ihr heutiger  
Gesundheitszustand**

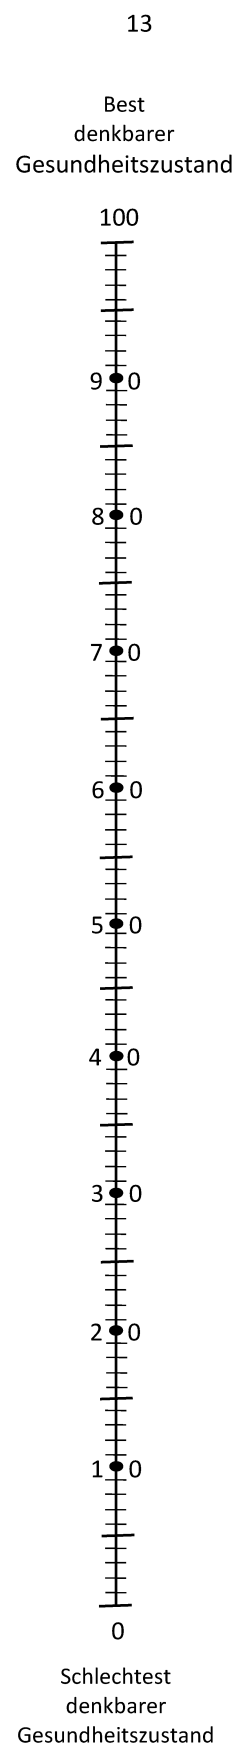



## 6. Achtsamkeit (FFA)

Dieser Fragebogen soll Ihre Achtsamkeit erfassen. Bitte beziehen Sie dabei die Aussagen auf die letzten 14 Tage. Kreuzen Sie bitte bei jeder Frage die Antwort an, die am besten auf Sie zutrifft.

|                                                                                                             | Fast nie | Eher selten | Relativ oft | Fast immer |
|-------------------------------------------------------------------------------------------------------------|----------|-------------|-------------|------------|
| 6.1. Ich bin offen für die Erfahrung des Augenblicks.                                                       | 1        | 2           | 3           | 4          |
| 6.2. Ich spüre in meinen Körper hinein, sei es beim Essen, Kochen, Putzen, Reden.                           | 1        | 2           | 3           | 4          |
| 6.3. Wenn ich merke, dass ich abwesend war, kehre ich sanft zur Erfahrung des Augenblicks zurück.           | 1        | 2           | 3           | 4          |
| 6.4. Ich kann mich selbst wertschätzen.                                                                     | 1        | 2           | 3           | 4          |
| 6.5. Ich achte auf die Motive meiner Handlungen.                                                            | 1        | 2           | 3           | 4          |
| 6.6. Ich sehe meine Fehler und Schwierigkeiten, ohne mich zu verurteilen.                                   | 1        | 2           | 3           | 4          |
| 6.7. Ich bin in Kontakt mit meinen Erfahrungen, hier und jetzt.                                             | 1        | 2           | 3           | 4          |
| 6.8. Ich nehme unangenehme Erfahrungen an.                                                                  | 1        | 2           | 3           | 4          |
| 6.9. Ich bin mir selbst gegenüber freundlich, wenn Dinge schief laufen.                                     | 1        | 2           | 3           | 4          |
| 6.10. Ich beobachte meine Gefühle, ohne mich in ihnen zu verlieren.                                         | 1        | 2           | 3           | 4          |
| 6.11. In schwierigen Situationen kann ich innehalten.                                                       | 1        | 2           | 3           | 4          |
| 6.12. Ich erlebe Momente innerer Ruhe und Gelassenheit, selbst wenn äußerlich Schmerzen und Unruhe da sind. | 1        | 2           | 3           | 4          |
| 6.13. Ich bin ungeduldig mit mir und meinen Mitmenschen.                                                    | 4        | 3           | 2           | 1          |



# Reduct

15

6.14. Ich kann darüber lächeln, wenn  
ich sehe, wie ich mir manchmal das  
Leben schwer mache.

1

2

3

4

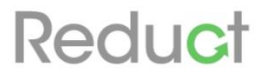

**7. Wie oft fühlten Sie sich im Verlauf der letzten 2 Wochen durch die folgenden Beschwerden beeinträchtigt? (PHQ-4)**

|                                                                      | <b>Überhaupt<br/>nicht</b> | <b>An einzelnen<br/>Tagen</b> | <b>An mehr als<br/>der Hälfte der<br/>Tage</b> | <b>Beinahe<br/>jeden Tag</b> |
|----------------------------------------------------------------------|----------------------------|-------------------------------|------------------------------------------------|------------------------------|
| 7.1. Wenig Interesse oder Freude an Ihren Tätigkeiten                | 0                          | 1                             | 2                                              | 3                            |
| 7.2. Niedergeschlagenheit, Schwermut oder Hoffnungslosigkeit         | 0                          | 1                             | 2                                              | 3                            |
| 7.3. Nervosität, Ängstlichkeit oder Anspannung                       | 0                          | 1                             | 2                                              | 3                            |
| 7.4. Nicht in der Lage sein, Sorgen zu stoppen oder zu kontrollieren | 0                          | 1                             | 2                                              | 3                            |

# Reduct

17

## 8. Skills

Kreuzen Sie bitte bei jeder Frage die Antwort an, die am besten auf Sie zutrifft.

|                                                                                                                      | Stimmt<br>überhaupt<br>nicht |   | Neutral |   | Stimmt<br>voll-<br>kommen |  |
|----------------------------------------------------------------------------------------------------------------------|------------------------------|---|---------|---|---------------------------|--|
|                                                                                                                      | 1                            | 2 | 3       | 4 | 5                         |  |
| <b>8.1. In belastenden Situationen kann ich mich aufmuntern, indem ich meine Gedanken auf positive Dinge richte.</b> | 1                            | 2 | 3       | 4 | 5                         |  |
| <b>8.2. Meine Gedanken geben mir im Umgang mit stressigen Situationen Kraft.</b>                                     | 1                            | 2 | 3       | 4 | 5                         |  |
| <b>8.3. Wenn ich belastende Gefühle verspüre, lasse ich sie zu.</b>                                                  | 1                            | 2 | 3       | 4 | 5                         |  |
| <b>8.4. Ich kann Dinge annehmen, die ich nicht ändern kann.</b>                                                      | 1                            | 2 | 3       | 4 | 5                         |  |
| <b>8.5. Ich überlege mir, was ich im Umgang mit der Krebserkrankung tun kann.</b>                                    | 1                            | 2 | 3       | 4 | 5                         |  |
| <b>8.6. Ich führe oft bestimmte Aktivitäten aus, um auf andere Gedanken zu kommen.</b>                               | 1                            | 2 | 3       | 4 | 5                         |  |
| <b>8.7. Ich kann mir wohlwollend begegnen.</b>                                                                       | 1                            | 2 | 3       | 4 | 5                         |  |
| <b>8.8. Ich kann gut für mich sorgen.</b>                                                                            | 1                            | 2 | 3       | 4 | 5                         |  |
| <b>8.9. Ich suche Kontakt zu liebevollen Menschen.</b>                                                               | 1                            | 2 | 3       | 4 | 5                         |  |

# Reduct

18

**8.10. Ich kann nach  
Unterstützung suchen.**

1

2

3

4

5



### III. Technikakzeptanz nach UTAUT

1. Nun stellen wir Ihnen einige Eigenschaften digitaler Gesundheitsangebote (wie das Make It Training) vor. Bitte geben Sie für jede Eigenschaft an, wie ausschlaggebend sie dafür ist, dass Sie ein digitales Gesundheitsangebot nutzen.

|                                                                                                               | Stimmt<br>überhaupt<br>nicht |   | Neutral |   | Stimmt<br>voll-<br>kommen |
|---------------------------------------------------------------------------------------------------------------|------------------------------|---|---------|---|---------------------------|
| 8.1. In belastenden Situationen kann ich mich aufmuntern, indem ich meine Gedanken auf positive Dinge richte. | 1                            | 2 | 3       | 4 | 5                         |
| 8.2. Meine Gedanken geben mir im Umgang mit stressigen Situationen Kraft.                                     | 1                            | 2 | 3       | 4 | 5                         |
| 8.3. Wenn ich belastende Gefühle verspüre, lasse ich sie zu.                                                  | 1                            | 2 | 3       | 4 | 5                         |
| 8.4. Ich kann Dinge annehmen, die ich nicht ändern kann.                                                      | 1                            | 2 | 3       | 4 | 5                         |
| 8.5. Ich überlege mir, was ich im Umgang mit der Krebserkrankung tun kann.                                    | 1                            | 2 | 3       | 4 | 5                         |
| 8.6. Ich werde oft aktiv, um auf andere Gedanken zu kommen.                                                   | 1                            | 2 | 3       | 4 | 5                         |
| 8.7. Ich kann mir wohlwollend begegnen.                                                                       | 1                            | 2 | 3       | 4 | 5                         |
| 8.8. Ich kann gut für mich sorgen.                                                                            | 1                            | 2 | 3       | 4 | 5                         |
| 8.9. Ich suche Kontakt zu liebevollen Menschen.                                                               | 1                            | 2 | 3       | 4 | 5                         |
| 8.10. Ich kann nach Unterstützung suchen.                                                                     | 1                            | 2 | 3       | 4 | 5                         |

# Reduct

20

| Von einem digitalen Gesundheitsangebot erwarte ich, dass ...                                                             | Stimme gar nicht zu | Stimme nicht zu | Stimme weder zu noch lehne ich ab | Stimme zu | Stimme voll und ganz zu |
|--------------------------------------------------------------------------------------------------------------------------|---------------------|-----------------|-----------------------------------|-----------|-------------------------|
| 1.1. ich es jederzeit nutzen kann.                                                                                       | 1                   | 2               | 3                                 | 4         | 5                       |
| 1.2. ich es auf verschiedenen Endgeräten nutzen kann (u.a. Handy, Laptop, Tablet).                                       | 1                   | 2               | 3                                 | 4         | 5                       |
| 1.3. es einfach zu bedienen ist.                                                                                         | 1                   | 2               | 3                                 | 4         | 5                       |
| 1.4. das Design ansprechend gestaltet und übersichtlich dargestellt ist.                                                 | 1                   | 2               | 3                                 | 4         | 5                       |
| 1.5. das Angebot so gestaltet ist, dass es mich bei auftretenden Problemen unterstützt und ich diese alleine lösen kann. | 1                   | 2               | 3                                 | 4         | 5                       |

# Reduct

21

**2. Die Nutzung eines digitalen Gesundheitsangebots ist immer mit einem gewissen Aufwand verbunden. Bitte beantworten Sie im Folgenden, inwieweit Sie den verschiedenen Aussagen zustimmen.**

| Um ein Gesundheitsangebot nutzen zu können, bin ich prinzipiell bereit, ...   | Stimme gar nicht zu | Stimme eher nicht zu | Stimme weder zu noch lehne ich ab | Stimme teilweise zu | Stimme voll und ganz zu |
|-------------------------------------------------------------------------------|---------------------|----------------------|-----------------------------------|---------------------|-------------------------|
| 2.1. zusätzliche Software auf mein Mobiltelefon/Computer/Tablet/... zu laden. | 1                   | 2                    | 3                                 | 4                   | 5                       |
| 2.2. mich regelmäßig mit den Aufgaben auseinandersetzen.                      | 1                   | 2                    | 3                                 | 4                   | 5                       |
| 2.3. Einheiten in die Freizeit mit einzuplanen.                               | 1                   | 2                    | 3                                 | 4                   | 5                       |

**3. Bitte geben Sie an, inwieweit Sie den verschiedenen Aussagen zustimmen.**

| Meiner Meinung nach, ...                                                                                                               | Stimme gar nicht zu | Stimme eher nicht zu | Stimme weder zu noch lehne ich ab | Stimme teilweise zu | Stimme voll und ganz zu |
|----------------------------------------------------------------------------------------------------------------------------------------|---------------------|----------------------|-----------------------------------|---------------------|-------------------------|
| 3.1. kann die Nutzung eines digitalen Gesundheitsangebots <u>negative</u> Auswirkungen auf die Meinung meines Umfelds über mich haben. | 1                   | 2                    | 3                                 | 4                   | 5                       |
| 3.2. benötigt die Nutzung eines digitalen Gesundheitsangebots viel Zeit.                                                               | 1                   | 2                    | 3                                 | 4                   | 5                       |

# Reduct

22

3.3. besteht das Risiko, dass die persönliche Interaktion zwischen der Ärztin/ dem Arzt und der Patientin/dem Patienten schwindet.

1                      2                      3                      4                      5

3.4. besteht das Risiko, dass ich mich während der Nutzung des digitalen Gesundheitsangebots "allein" gelassen fühle.

1                      2                      3                      4                      5

## 4. Informationen über digitale Gesundheitsangebote können über persönliche Kontakte oder auch Medien verbreitet werden. Bitte geben Sie an, inwieweit Sie den folgenden Aussagen zustimmen.

|                                                                                                                                                                                           | Stimme<br>gar nicht<br>zu | Stimme<br>eher nicht<br>zu | Stimme<br>weder zu<br>noch<br>lehne ich<br>ab | Stimme<br>teilweise<br>zu | Stimme<br>voll und<br>ganz zu |
|-------------------------------------------------------------------------------------------------------------------------------------------------------------------------------------------|---------------------------|----------------------------|-----------------------------------------------|---------------------------|-------------------------------|
| 4.1. In den Medien sind Beiträge zu finden, die positiv über digitale Gesundheitsangebote zur Unterstützung im Umgang mit krankheitsbezogenen Belastungen berichten.                      | 1                         | 2                          | 3                                             | 4                         | 5                             |
| 4.2. Die Mehrheit meiner Freunde und Arbeitskollegen beurteilen die Verwendung digitaler Gesundheitsangebote zur Unterstützung im Umgang mit krankheitsbezogenen Belastungen als positiv. | 1                         | 2                          | 3                                             | 4                         | 5                             |



# Reduct

23

4.3. Personen, die mir wichtig sind, halten es für eine gute Idee, ein digitales Gesundheitsangebot zur Unterstützung im Umgang mit krankheitsbezogenen Belastungen zu nutzen.

1                      2                      3                      4                      5

4.4. Einige meiner Freunde/Bekannten haben mir empfohlen, ein digitales Gesundheitsangebot zur Unterstützung im Umgang mit krankheitsbezogenen Belastungen auszuprobieren.

1                      2                      3                      4                      5



## V. Nutzung von Technologien

1. Wie häufig nutzen Sie die folgenden Technologien privat?

|                    | nie/besitze<br>ich nicht | eher<br>weniger (als<br>1x/Woche) | mäßig<br>(mehr als<br>1x/Woche) | oft (täglich) | Sehr oft<br>(mehrmals<br>täglich) |
|--------------------|--------------------------|-----------------------------------|---------------------------------|---------------|-----------------------------------|
| <u>PC/Laptop:</u>  | 1                        | 2                                 | 3                               | 4             | 5                                 |
| <u>Tablet:</u>     | 1                        | 2                                 | 3                               | 4             | 5                                 |
| <u>Smartphone:</u> | 1                        | 2                                 | 3                               | 4             | 5                                 |

2. Bitte geben Sie an, wie lange am Tag Sie ca. digitale Medien (wie digitales Fernsehen, eBooks, Computer, Smartphone) nutzen.

- 0-1 Stunde   
  1-2 Stunden   
  2-3 Stunden   
  3-4 Stunden   
  Mehr als 4 Stunden

3. Bitte geben Sie im Folgenden an, inwieweit Sie den verschiedenen Aussagen zustimmen.

|                                                        | Stimme gar<br>nicht zu | Stimme nicht<br>zu | Stimme<br>weder zu<br>noch lehne<br>ich ab | Stimme zu | Stimme voll<br>und ganz zu |
|--------------------------------------------------------|------------------------|--------------------|--------------------------------------------|-----------|----------------------------|
| 5.3.1. Ich kann gut mit digitalen Medien umgehen.      | 1                      | 2                  | 3                                          | 4         | 5                          |
| 5.3.2. Ich bin offen für verschiedene digitale Medien. | 1                      | 2                  | 3                                          | 4         | 5                          |

# Reduct

25

|                 |   |   |   |   |   |
|-----------------|---|---|---|---|---|
| 5.3.3. Ich habe |   |   |   |   |   |
| Erfahrung mit   | 1 | 2 | 3 | 4 | 5 |
| digitalen       |   |   |   |   |   |
| Gesundheitsa    |   |   |   |   |   |
| ngeboten im     |   |   |   |   |   |
| Umgang mit      |   |   |   |   |   |
| krankheitsbez   |   |   |   |   |   |
| ogenen          |   |   |   |   |   |
| Belastungen.    |   |   |   |   |   |



**VI. Inwieweit sind die folgenden Themen für den Umgang mit Ihrer Krebserkrankung für Sie wichtig?**

|                                | Überhaupt<br>nicht wichtig | Wenig<br>wichtig         | Mäßig<br>wichtig         | Eher<br>wichtig          | Sehr wichtig             |
|--------------------------------|----------------------------|--------------------------|--------------------------|--------------------------|--------------------------|
| Gesundheitsbezogenes Verhalten | 1                          | 2                        | 3                        | 4                        | 5                        |
| Gefühle                        | 1                          | 2                        | 3                        | 4                        | 5                        |
| Kreativität                    | 1                          | 2                        | 3                        | 4                        | 5                        |
| Schmerzerleben                 | 1                          | 2                        | 3                        | 4                        | 5                        |
| Angst                          | 1                          | 2                        | 3                        | 4                        | 5                        |
| Kraftquellen                   | 1                          | 2                        | 3                        | 4                        | 5                        |
| Positivität                    | 1                          | 2                        | 3                        | 4                        | 5                        |
| Körpergefühl                   | 1                          | 2                        | 3                        | 4                        | 5                        |
| Bewegung und Entspannung       | 1                          | 2                        | 3                        | 4                        | 5                        |
| Stressmanagement               | <input type="checkbox"/>   | <input type="checkbox"/> | <input type="checkbox"/> | <input type="checkbox"/> | <input type="checkbox"/> |
| Schlaf                         | <input type="checkbox"/>   | <input type="checkbox"/> | <input type="checkbox"/> | <input type="checkbox"/> | <input type="checkbox"/> |
| Selbstzuwendung                | <input type="checkbox"/>   | <input type="checkbox"/> | <input type="checkbox"/> | <input type="checkbox"/> | <input type="checkbox"/> |
| Beziehungen                    | <input type="checkbox"/>   | <input type="checkbox"/> | <input type="checkbox"/> | <input type="checkbox"/> | <input type="checkbox"/> |

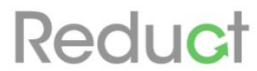

27

Liebe Teilnehmerin, lieber Teilnehmer,

Vielen Dank für Ihre Teilnahme an der ersten Befragung der Reduct Studie. Für die nächsten Schritte wird sich das Reduct Team in den nächsten Tagen bei Ihnen melden.

Sollten Sie Fragen haben, können Sie gerne jederzeit eine E-Mail an [reduct@uni-due.de](mailto:reduct@uni-due.de) senden.

Wir wünschen Ihnen alles Gute!

Ihr Reduct Team

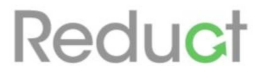

Teilnehmer-ID: \_\_\_\_\_

## Reduct- Web-Basierte Achtsamkeits- und Skillsbasierte Stressreduktion für Patientinnen und Patienten mit Krebs

Liebe Teilnehmerin, lieber Teilnehmer,

wir hoffen, dass Ihnen die Reduct-Web-App gefallen hat und dass Sie die Inhalte als hilfreich im Umgang mit Belastungen erlebt haben. Die Informationen und Übungen, die Sie gesammelt haben, stehen Ihnen aber weiterhin zur Verfügung. Somit können Sie diese auch zukünftig zum Üben ihrer Skills nutzen und somit nachhaltig und langfristig vom Training profitieren.

Zum Abschluss des Trainings möchten wir Sie bitten, erneut einen Fragebogen auszufüllen. Dieser wird ca. 15 - 20 Minuten Ihrer Zeit in Anspruch nehmen. Wir möchten gerne erfahren, wie Sie die Inhalte der Reduct-Web-App sowie die technische Umsetzung erlebt haben. Diese Informationen helfen uns dabei, das Training zu verbessern und vielen Patienten zur Verfügung zu stellen.

Sollten Sie Fragen haben, können Sie gerne jederzeit eine E-Mail an [reduct@uni-due.de](mailto:reduct@uni-due.de) senden.

Wenn Sie merken, dass Sie sich sehr belastet fühlen und Sie mehr Unterstützung bei der Bewältigung Ihrer Erkrankung benötigen, können Sie sich jederzeit an die/den Studienverantwortliche/n Ihres Zentrums wenden. Diese/r kann Ihnen bei der Suche psychoonkologischer Hilfsangebote zur Seite stehen.

Vielen Dank für Ihre Teilnahme und Unterstützung!

Ihr Reduct Team

*\*Kontaktdaten*

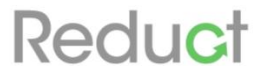

[2]

## I. Fragen zu Ihrem derzeitigen Befinden

### 1. Angst und Stresserleben

Bitte beantworten Sie im Folgenden, wie sehr die jeweilige Aussage in der letzten Woche auf Sie zutraf.

1.1. Ich fühle mich angespannt oder überreizt.

- 3 meistens
- 2 oft
- 1 von Zeit zu Zeit/ gelegentlich
- 0 überhaupt nicht

1.2. Ich fühle mich in meinen Aktivitäten gebremst.

- 3 fast immer
- 2 sehr oft
- 1 manchmal
- 0 überhaupt nicht

1.3. Ich kann mich heute noch so freuen wie früher.

- 0 ganz genau so
- 1 nicht ganz so sehr
- 2 Nur noch ein wenig
- 3 kaum oder gar nicht

1.4. Ich habe manchmal ein ängstliches Gefühl in der Magengegend.

- 0 überhaupt nicht
- 1 gelegentlich
- 2 ziemlich oft
- 3 sehr oft

1.5. Mich überkommt eine ängstliche Vorahnung, dass etwas Schreckliches passieren könnte.

- 3 ja, sehr stark
- 2 ja, aber nicht allzu stark
- 1 etwas, aber es macht mir keine Sorgen
- 0 überhaupt nicht

1.6. Ich habe das Interesse an meiner äußeren Erscheinung verloren.

- 3 ja, stimmt genau
- 2 ich kümmere mich nicht so sehr darum, wie ich sollte
- 1 möglicherweise kümmere ich mich zu wenig darum
- 0 ich kümmere mich so viel darum wie immer

# Reduct

3

1.7. Ich kann lachen und die lustige Seite der Dinge sehen.

- 0 ja, so viel wie immer
- 1 nicht mehr ganz so viel
- 2 inzwischen viel weniger
- 3 überhaupt nicht

1.8. Ich fühle mich rastlos, muss immer in Bewegung sein.

- 3 ja, tatsächlich sehr
- 2 ziemlich
- 1 nicht sehr
- 0 überhaupt nicht

1.9. Mir gehen beunruhigende Gedanken durch den Kopf.

- 3 einen Großteil der Zeit
- 2 verhältnismäßig oft
- 1 von Zeit zu Zeit, aber nicht allzu oft
- 0 nur gelegentlich/nie

1.10. Ich blicke mit Freude in die Zukunft.

- 0 ja, sehr
- 1 eher weniger als früher
- 2 viel weniger als früher
- 3 kaum bis gar nicht

1.11. Ich fühle mich glücklich.

- 3 überhaupt nicht
- 2 selten
- 1 manchmal
- 0 meistens

1.12. Mich überkommt plötzlich ein panikartiger Zustand.

- 3 ja, tatsächlich sehr oft
- 2 ziemlich oft
- 1 nicht sehr oft
- 0 überhaupt nicht

1.13. Ich kann behaglich dasitzen und mich entspannen.

- 0 ja, natürlich
- 1 gewöhnlich schon
- 2 nicht oft
- 3 überhaupt nicht

1.14. Ich kann mich an einem guten Buch, einer Radio- oder Fernsehsendung erfreuen.

- 0 oft
- 1 manchmal
- 2 Eher selten
- 3 Sehr selten



## 2. Belastungsthermometer

Bitte markieren Sie am Thermometer die Zahl, die am besten beschreibt, wie belastet Sie sich in der letzten Woche einschließlich heute gefühlt haben.

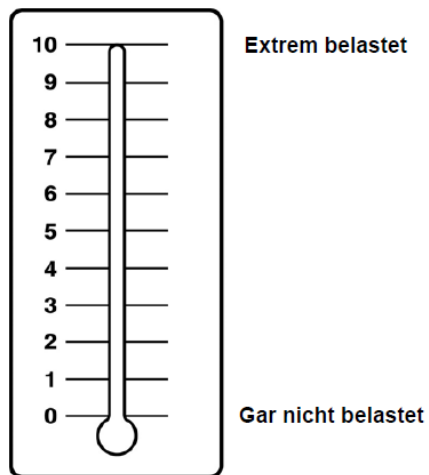



### 3. Skala zur Allgemeinen Selbstwirksamkeitserwartung

Kreuzen Sie bitte bei jeder Frage die Antwort an, die am besten auf Sie zutrifft.

|                                                                                                    | Stimmt<br>nicht | Stimmt<br>kaum | Stimmt<br>eher | Stimmt<br>genau |
|----------------------------------------------------------------------------------------------------|-----------------|----------------|----------------|-----------------|
| 3.1. Wenn sich Widerstände auftun, finde ich Mittel und Wege, mich durchzusetzen.                  | 1               | 2              | 3              | 4               |
| 3.2. Die Lösung schwieriger Probleme gelingt mir immer, wenn ich mich darum bemühe.                | 1               | 2              | 3              | 4               |
| 3.3. Es bereitet mir keine Schwierigkeiten, meine Absichten und Ziele zu verwirklichen.            | 1               | 2              | 3              | 4               |
| 3.4. In unerwarteten Situationen weiß ich immer, wie ich mich verhalten soll.                      | 1               | 2              | 3              | 4               |
| 3.5. Auch bei überraschenden Ereignissen glaube ich, dass ich gut mit ihnen zurechtkommen kann.    | 1               | 2              | 3              | 4               |
| 3.6. Schwierigkeiten sehe ich gelassen entgegen, weil ich meinen Fähigkeiten immer vertrauen kann. | 1               | 2              | 3              | 4               |
| 3.7. Was auch immer passiert, ich werde schon klarkommen.                                          | 1               | 2              | 3              | 4               |
| 3.8. Für jedes Problem kann ich eine Lösung finden.                                                | 1               | 2              | 3              | 4               |
| 3.9. Wenn eine neue Sache auf mich zukommt, weiß ich, wie ich damit umgehen kann.                  | 1               | 2              | 3              | 4               |
| 3.10. Wenn ein Problem auftaucht, kann ich es aus eigener Kraft meistern.                          | 1               | 2              | 3              | 4               |

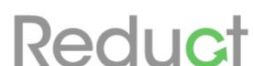

#### 4. Lebensqualität (EORT-QLQ-C30)

Bitte kreuzen Sie im Folgenden Abschnitt die Zahl von 1 bis 4 an, die am besten auf Sie zutrifft.

|                                                                                                                                      | Überhaupt<br>nicht | Wenig | Mäßig | Sehr |
|--------------------------------------------------------------------------------------------------------------------------------------|--------------------|-------|-------|------|
| 4.1. Bereitet es Ihnen Schwierigkeiten, sich körperlich anzustrengen (z.B. eine schwere Einkaufstasche oder einen Koffer zu tragen)? | 1                  | 2     | 3     | 4    |
| 4.2. Bereitet es Ihnen Schwierigkeiten, einen <u>längeren</u> Spaziergang zu machen?                                                 | 1                  | 2     | 3     | 4    |
| 4.3. Bereitet es Ihnen Schwierigkeiten, eine <u>kurze</u> Strecke außer Haus zu gehen?                                               | 1                  | 2     | 3     | 4    |
| 4.4. Müssen Sie tagsüber im Bett liegen oder in einem Sessel sitzen?                                                                 | 1                  | 2     | 3     | 4    |
| 4.5. Brauchen Sie Hilfe beim Essen, Anziehen, Waschen oder Benutzen der Toilette?                                                    | 1                  | 2     | 3     | 4    |
| <b>Während der letzten Woche:</b>                                                                                                    |                    |       |       |      |
|                                                                                                                                      | Überhaupt<br>nicht | Wenig | Mäßig | Sehr |
| 4.6. Waren Sie bei Ihrer Arbeit oder bei anderen tagtäglichen Beschäftigungen eingeschränkt?                                         | 1                  | 2     | 3     | 4    |
| 4.7. Waren Sie bei Ihren Hobbys oder andere Freizeitbeschäftigungen eingeschränkt?                                                   | 1                  | 2     | 3     | 4    |
| 4.8. Waren Sie kurzatmig?                                                                                                            | 1                  | 2     | 3     | 4    |
| 4.9. Hatten Sie Schmerzen?                                                                                                           | 1                  | 2     | 3     | 4    |
| 4.10. Mussten Sie sich ausruhen?                                                                                                     | 1                  | 2     | 3     | 4    |
| 4.11. Hatten Sie Schlafstörungen?                                                                                                    | 1                  | 2     | 3     | 4    |

# Reduct

7

4.12. Fühlten Sie sich schwach?

|   |   |   |   |
|---|---|---|---|
| 1 | 2 | 3 | 4 |
|---|---|---|---|

**Während der letzten Woche:****Überhaupt  
nicht****Wenig****Mäßig****Sehr**

4.13. Hatten Sie Appetitmangel?

|   |   |   |   |
|---|---|---|---|
| 1 | 2 | 3 | 4 |
|---|---|---|---|

4.14. War Ihnen übel?

|   |   |   |   |
|---|---|---|---|
| 1 | 2 | 3 | 4 |
|---|---|---|---|

4.15. Haben Sie erbrochen?

|   |   |   |   |
|---|---|---|---|
| 1 | 2 | 3 | 4 |
|---|---|---|---|

4.16. Hatten Sie Verstopfung?

|   |   |   |   |
|---|---|---|---|
| 1 | 2 | 3 | 4 |
|---|---|---|---|

4.17. Hatten Sie Durchfall?

|   |   |   |   |
|---|---|---|---|
| 1 | 2 | 3 | 4 |
|---|---|---|---|

4.18. Waren Sie müde?

|   |   |   |   |
|---|---|---|---|
| 1 | 2 | 3 | 4 |
|---|---|---|---|

4.19. Fühlten Sie sich durch  
Schmerzen in Ihrem alltäglichen  
Leben beeinträchtigt?

|   |   |   |   |
|---|---|---|---|
| 1 | 2 | 3 | 4 |
|---|---|---|---|

4.20. Hatten Sie Schwierigkeiten, sich  
auf etwas zu konzentrieren, z.B. auf  
das Zeitungslesen oder das  
Fernsehen?

|   |   |   |   |
|---|---|---|---|
| 1 | 2 | 3 | 4 |
|---|---|---|---|

4.21. Fühlten Sie sich angespannt?

|   |   |   |   |
|---|---|---|---|
| 1 | 2 | 3 | 4 |
|---|---|---|---|

4.22. Haben Sie sich Sorgen  
gemacht?

|   |   |   |   |
|---|---|---|---|
| 1 | 2 | 3 | 4 |
|---|---|---|---|

4.23. Waren Sie reizbar?

|   |   |   |   |
|---|---|---|---|
| 1 | 2 | 3 | 4 |
|---|---|---|---|

4.24. Fühlten Sie sich  
niedergeschlagen?

|   |   |   |   |
|---|---|---|---|
| 1 | 2 | 3 | 4 |
|---|---|---|---|

4.25. Hatten Sie Schwierigkeiten, sich  
an Dinge zu erinnern?

|   |   |   |   |
|---|---|---|---|
| 1 | 2 | 3 | 4 |
|---|---|---|---|

4.26. Hat Ihr körperlicher Zustand  
oder Ihre medizinische Behandlung  
Ihr Familienleben beeinträchtigt?

|   |   |   |   |
|---|---|---|---|
| 1 | 2 | 3 | 4 |
|---|---|---|---|

## Reduct

8

4.27. Hat Ihr körperlicher Zustand oder Ihre medizinische Behandlung Ihr Zusammensein oder Ihre gemeinsamen Unternehmungen mit anderen Menschen beeinträchtigt?

1

2

3

4

4.28. Hat Ihr körperlicher Zustand oder Ihre medizinische Behandlung für Sie finanzielle Schwierigkeiten mit sich gebracht?

1

2

3

4

**Bitte kreuzen Sie bei den folgenden Fragen die Zahl zwischen 1 und 7 an, die am besten auf Sie zutrifft.**

4.29. Wie würden Sie insgesamt Ihren Gesundheitszustand während der letzten Woche einschätzen?

1

2

3

4

5

6

7

sehr  
schlecht

ausgezeichnet

4.30. Wie würden Sie insgesamt Ihre Lebensqualität während der letzten Woche einschätzen?

1

2

3

4

5

6

7

sehr  
schlecht

ausgezeichnet



## 5. Lebensqualität (EQ-5D-5L)

Bitte kreuzen Sie unter jeder Überschrift das Kästchen an, das Ihren Gesundheitszustand heute am besten beschreibt.

besten beschreibt.

### 5.1. Beweglichkeit/Mobilität

|                                         |   |
|-----------------------------------------|---|
| Ich habe keine Probleme herumzugehen    | 1 |
| Ich habe leichte Probleme herumzugehen  | 2 |
| Ich habe mäßige Probleme herumzugehen   | 3 |
| Ich habe große Probleme herumzugehen    | 4 |
| Ich bin nicht in der Lage, herumzugehen | 5 |

### 5.2. Für sich selbst sorgen

|                                                                   |   |
|-------------------------------------------------------------------|---|
| Ich habe keine Probleme, mich selbst zu waschen oder anzuziehen   | 1 |
| Ich habe leichte Probleme, mich selbst zu waschen oder anzuziehen | 2 |
| Ich habe mäßige Probleme, mich selbst zu waschen oder anzuziehen  | 3 |
| Ich habe große Probleme, mich selbst zu waschen oder anzuziehen   | 4 |
| Ich bin nicht in der Lage, mich selbst zu waschen oder anzuziehen | 5 |

### 5.3. Alltägliche Tätigkeiten (z.B. Arbeit, Studium, Hausarbeit, Familien- oder Freizeitaktivitäten)

|                                                                        |   |
|------------------------------------------------------------------------|---|
| Ich habe keine Probleme, meinen alltäglichen Tätigkeiten nachzugehen   | 1 |
| Ich habe leichte Probleme, meinen alltäglichen Tätigkeiten nachzugehen | 2 |
| Ich habe mäßige Probleme, meinen alltäglichen Tätigkeiten nachzugehen  | 3 |
| Ich habe große Probleme, meinen alltäglichen Tätigkeiten nachzugehen   | 4 |
| Ich bin nicht in der Lage, meinen alltäglichen Tätigkeiten nachzugehen | 5 |

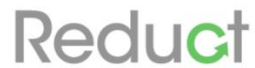**5.4. Schmerzen/Körperliche Beschwerden**

|                                             |   |
|---------------------------------------------|---|
| Ich habe keine Schmerzen oder Beschwerden   | 1 |
| Ich habe leichte Schmerzen oder Beschwerden | 2 |
| Ich habe mäßige Schmerzen oder Beschwerden  | 3 |
| Ich habe starke Schmerzen oder Beschwerden  | 4 |
| Ich habe extreme Schmerzen oder Beschwerden | 5 |

**5.5. Angst/Niedergeschlagenheit**

|                                             |   |
|---------------------------------------------|---|
| Ich bin nicht ängstlich oder deprimiert     | 1 |
| Ich bin ein wenig ängstlich oder deprimiert | 2 |
| Ich bin mäßig ängstlich oder deprimiert     | 3 |
| Ich bin sehr ängstlich oder deprimiert      | 4 |
| Ich bin extrem ängstlich oder deprimiert    | 5 |

Reduct

11

5.6. Um Sie bei der Einschätzung, wie gut oder wie schlecht Ihr Gesundheitszustand ist, zu unterstützen, haben wir eine Skala gezeichnet, ähnlich einem Thermometer. Der best denkbare Gesundheitszustand ist mit einer "100" gekennzeichnet, der schlechteste mit "0".

Wir möchten Sie nun bitten, auf dieser Skala zu kennzeichnen, wie gut oder schlecht Ihrer Ansicht nach Ihr persönlicher Gesundheitszustand heute ist. Bitte verbinden Sie dazu den untenstehenden Kasten mit dem Punkt auf der Skala, der Ihren heutigen Gesundheitszustand am besten wiedergibt.

**Ihr heutiger  
Gesundheitszustand**

Best  
denkbarer  
Gesundheitszustand

100

90

80

70

60

50

40

30

20

10

0

Schlechtest  
denkbarer  
Gesundheitszustand



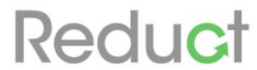

## 6. Achtsamkeit (FFA)

**Dieser Fragebogen soll Ihre Achtsamkeit erfassen. Bitte beziehen Sie dabei die Aussagen auf die letzten 14 Tage. Kreuzen Sie bitte bei jeder Frage die Antwort an, die am besten auf Sie zutrifft.**

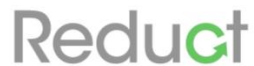

**7. Wie oft fühlten Sie sich im Verlauf der letzten 2 Wochen durch die folgenden Beschwerden beeinträchtigt? (PHQ-4)**

|                                                                                                             | <b>Fast nie</b> | <b>Eher selten</b> | <b>Relativ oft</b> | <b>Fast immer</b> |
|-------------------------------------------------------------------------------------------------------------|-----------------|--------------------|--------------------|-------------------|
| 6.1. Ich bin offen für die Erfahrung des Augenblicks.                                                       | 1               | 2                  | 3                  | 4                 |
| 6.2. Ich spüre in meinen Körper hinein, sei es beim Essen, Kochen, Putzen, Reden.                           | 1               | 2                  | 3                  | 4                 |
| 6.3. Wenn ich merke, dass ich abwesend war, kehre ich sanft zur Erfahrung des Augenblicks zurück.           | 1               | 2                  | 3                  | 4                 |
| 6.4. Ich kann mich selbst wertschätzen.                                                                     | 1               | 2                  | 3                  | 4                 |
| 6.5. Ich achte auf die Motive meiner Handlungen.                                                            | 1               | 2                  | 3                  | 4                 |
| 6.6. Ich sehe meine Fehler und Schwierigkeiten, ohne mich zu verurteilen.                                   | 1               | 2                  | 3                  | 4                 |
| 6.7. Ich bin in Kontakt mit meinen Erfahrungen, hier und jetzt.                                             | 1               | 2                  | 3                  | 4                 |
| 6.8. Ich nehme unangenehme Erfahrungen an.                                                                  | 1               | 2                  | 3                  | 4                 |
| 6.9. Ich bin mir selbst gegenüber freundlich, wenn Dinge schief laufen.                                     | 1               | 2                  | 3                  | 4                 |
| 6.10. Ich beobachte meine Gefühle, ohne mich in ihnen zu verlieren.                                         | 1               | 2                  | 3                  | 4                 |
| 6.11. In schwierigen Situationen kann ich innehalten.                                                       | 1               | 2                  | 3                  | 4                 |
| 6.12. Ich erlebe Momente innerer Ruhe und Gelassenheit, selbst wenn äußerlich Schmerzen und Unruhe da sind. | 1               | 2                  | 3                  | 4                 |
| 6.13. Ich bin ungeduldig mit mir und meinen Mitmenschen.                                                    | 4               | 3                  | 2                  | 1                 |
| 6.14. Ich kann darüber lächeln, wenn ich sehe, wie ich mir manchmal das Leben schwer mache.                 | 1               | 2                  | 3                  | 4                 |



14

|                                                                      | <b>Überhaupt nicht</b> | <b>An einzelnen Tagen</b> | <b>An mehr als der Hälfte der Tage</b> | <b>Beinahe jeden Tag</b> |
|----------------------------------------------------------------------|------------------------|---------------------------|----------------------------------------|--------------------------|
| 7.1. Wenig Interesse oder Freude an Ihren Tätigkeiten                | 0                      | 1                         | 2                                      | 3                        |
| 7.2. Niedergeschlagenheit, Schwermut oder Hoffnungslosigkeit         | 0                      | 1                         | 2                                      | 3                        |
| 7.3. Nervosität, Ängstlichkeit oder Anspannung                       | 0                      | 1                         | 2                                      | 3                        |
| 7.4. Nicht in der Lage sein, Sorgen zu stoppen oder zu kontrollieren | 0                      | 1                         | 2                                      | 3                        |

## 8. Skills

Kreuzen Sie bitte bei jeder Frage die Antwort an, die am besten auf Sie zutrifft.

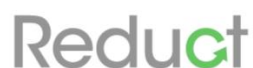

## II. Fragen zum Training

### 1. Patientenzufriedenheit (CSQ-1 adapted to Internet-based interventions)

Nun folgen Fragen dazu, wie zufrieden Sie mit dem Training/ der Reduct-Web-App waren.

|                                                                                                               | Stimmt<br>überhaupt<br>nicht |   | Neutral |   | Stimmt<br>voll-<br>kommen |
|---------------------------------------------------------------------------------------------------------------|------------------------------|---|---------|---|---------------------------|
| 8.1. In belastenden Situationen kann ich mich aufmuntern, indem ich meine Gedanken auf positive Dinge richte. | 1                            | 2 | 3       | 4 | 5                         |
| 8.2. Meine Gedanken geben mir im Umgang mit stressigen Situationen Kraft.                                     | 1                            | 2 | 3       | 4 | 5                         |
| 8.3. Wenn ich belastende Gefühle verspüre, lasse ich sie zu.                                                  | 1                            | 2 | 3       | 4 | 5                         |
| 8.4. Ich kann Dinge annehmen, die ich nicht ändern kann.                                                      | 1                            | 2 | 3       | 4 | 5                         |
| 8.5. Ich überlege mir, was ich im Umgang mit der Krebserkrankung tun kann.                                    | 1                            | 2 | 3       | 4 | 5                         |
| 8.6. Ich führe oft bestimmte Aktivitäten aus, um auf andere Gedanken zu kommen.                               | 1                            | 2 | 3       | 4 | 5                         |
| 8.7. Ich kann mir wohlwollend begegnen.                                                                       | 1                            | 2 | 3       | 4 | 5                         |
| 8.8. Ich kann gut für mich sorgen.                                                                            | 1                            | 2 | 3       | 4 | 5                         |
| 8.9. Ich suche Kontakt zu liebevollen Menschen.                                                               | 1                            | 2 | 3       | 4 | 5                         |
| 8.10. Ich kann nach Unterstützung suchen.                                                                     | 1                            | 2 | 3       | 4 | 5                         |



|                                                                                                                                  | <b>Trifft<br/>nicht zu</b>    | <b>Trifft<br/>eher<br/>nicht zu</b> | <b>Trifft<br/>teilweise<br/>zu</b> | <b>Trifft voll<br/>und ganz<br/>zu</b> |
|----------------------------------------------------------------------------------------------------------------------------------|-------------------------------|-------------------------------------|------------------------------------|----------------------------------------|
| 2.1. Das Training, an dem ich teilgenommen habe, hatte eine hohe Qualität                                                        | <input type="checkbox"/><br>1 | <input type="checkbox"/><br>2       | <input type="checkbox"/><br>3      | <input type="checkbox"/><br>4          |
| 2.2. Ich habe die Art von Training erhalten, die ich wollte.                                                                     | <input type="checkbox"/><br>1 | <input type="checkbox"/><br>2       | <input type="checkbox"/><br>3      | <input type="checkbox"/><br>4          |
| 2.3. Das Training hat meinen Bedürfnissen entsprochen.                                                                           | <input type="checkbox"/><br>1 | <input type="checkbox"/><br>2       | <input type="checkbox"/><br>3      | <input type="checkbox"/><br>4          |
| 2.4. Ich würde einem Freund oder einer Freundin dieses Training empfehlen, wenn er oder sie eine ähnliche Hilfe benötigen würde. | <input type="checkbox"/><br>1 | <input type="checkbox"/><br>2       | <input type="checkbox"/><br>3      | <input type="checkbox"/><br>4          |
| 2.5. Ich bin zufrieden mit dem Ausmaß der Hilfe, die ich durch das Training erhalten habe.                                       | <input type="checkbox"/><br>1 | <input type="checkbox"/><br>2       | <input type="checkbox"/><br>3      | <input type="checkbox"/><br>4          |
| 2.6. Das Training hat mir dabei geholfen, angemessener mit meinen Problemen umzugehen.                                           | <input type="checkbox"/><br>1 | <input type="checkbox"/><br>2       | <input type="checkbox"/><br>3      | <input type="checkbox"/><br>4          |
| 2.7. Im Großen und Ganzen bin ich mit dem Training zufrieden.                                                                    | <input type="checkbox"/><br>1 | <input type="checkbox"/><br>2       | <input type="checkbox"/><br>3      | <input type="checkbox"/><br>4          |
| 2.8. Ich würde ein solches Training wieder nutzen, wenn ich Hilfe bräuchte.                                                      | <input type="checkbox"/><br>1 | <input type="checkbox"/><br>2       | <input type="checkbox"/><br>3      | <input type="checkbox"/><br>4          |



## 2. Nutzbarkeit des Trainings (SUS)

2.1. Ich denke, dass ich das Programm (Reduct-Web-App) häufig benutzen würde.

| Stimme<br>überhaupt nicht zu |                          |                          |                          |                          | Stimme<br>voll zu        |
|------------------------------|--------------------------|--------------------------|--------------------------|--------------------------|--------------------------|
| 1                            | 2                        | 3                        | 4                        | 5                        |                          |
| <input type="checkbox"/>     | <input type="checkbox"/> | <input type="checkbox"/> | <input type="checkbox"/> | <input type="checkbox"/> | <input type="checkbox"/> |

2.2. Ich fand das Programm (Reduct-Web-App) unnötig komplex.

| Stimme<br>überhaupt nicht zu |                          |                          |                          |                          | Stimme<br>voll zu        |
|------------------------------|--------------------------|--------------------------|--------------------------|--------------------------|--------------------------|
| 1                            | 2                        | 3                        | 4                        | 5                        |                          |
| <input type="checkbox"/>     | <input type="checkbox"/> | <input type="checkbox"/> | <input type="checkbox"/> | <input type="checkbox"/> | <input type="checkbox"/> |

2.3 Ich fand das Programm (Reduct-Web-App) war einfach zu benutzen.

| Stimme<br>überhaupt nicht zu |                          |                          |                          |                          | Stimme<br>voll zu        |
|------------------------------|--------------------------|--------------------------|--------------------------|--------------------------|--------------------------|
| 1                            | 2                        | 3                        | 4                        | 5                        |                          |
| <input type="checkbox"/>     | <input type="checkbox"/> | <input type="checkbox"/> | <input type="checkbox"/> | <input type="checkbox"/> | <input type="checkbox"/> |

2.4 Ich denke, ich hätte die Hilfe einer technisch versierten Person benötigt, um das Programm (Reduct-Web-App) besser nutzen zu können.

| Stimme<br>überhaupt nicht zu |                          |                          |                          |                          | Stimme<br>voll zu        |
|------------------------------|--------------------------|--------------------------|--------------------------|--------------------------|--------------------------|
| 1                            | 2                        | 3                        | 4                        | 5                        |                          |
| <input type="checkbox"/>     | <input type="checkbox"/> | <input type="checkbox"/> | <input type="checkbox"/> | <input type="checkbox"/> | <input type="checkbox"/> |

2.5 Ich fand, die verschiedenen Funktionen in diesem Programm (Reduct-Web-App) griffen gut ineinander.

| Stimme<br>überhaupt nicht zu |                          |                          |                          |                          | Stimme<br>voll zu        |
|------------------------------|--------------------------|--------------------------|--------------------------|--------------------------|--------------------------|
| 1                            | 2                        | 3                        | 4                        | 5                        |                          |
| <input type="checkbox"/>     | <input type="checkbox"/> | <input type="checkbox"/> | <input type="checkbox"/> | <input type="checkbox"/> | <input type="checkbox"/> |

2.6 Ich denke, das Programm (Reduct-Web-App) enthielt zu viele Inkonsistenzen (Unstimmigkeiten).

| Stimme<br>überhaupt nicht zu |                                     |                          |                          |                          | Stimme<br>voll zu        |
|------------------------------|-------------------------------------|--------------------------|--------------------------|--------------------------|--------------------------|
| 1                            | 2                                   | 3                        | 4                        | 5                        |                          |
| <input type="checkbox"/>     | <input checked="" type="checkbox"/> | <input type="checkbox"/> | <input type="checkbox"/> | <input type="checkbox"/> | <input type="checkbox"/> |

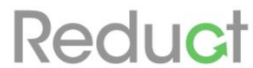

2.7 Ich kann mir vorstellen, dass die meisten Menschen den Umgang mit diesem Programm (Reduct-Web-App) sehr schnell lernen können.

| Stimme<br>überhaupt nicht zu |                          |                          |                          |                          | Stimme<br>voll zu        |
|------------------------------|--------------------------|--------------------------|--------------------------|--------------------------|--------------------------|
| 1                            | 2                        | 3                        | 4                        | 5                        |                          |
| <input type="checkbox"/>     | <input type="checkbox"/> | <input type="checkbox"/> | <input type="checkbox"/> | <input type="checkbox"/> | <input type="checkbox"/> |

2.8 Ich fand das Programm (Reduct-Web-App) sehr umständlich zu benutzen.

| Stimme<br>überhaupt nicht zu |                          |                          |                          |                          | Stimme<br>voll zu        |
|------------------------------|--------------------------|--------------------------|--------------------------|--------------------------|--------------------------|
| 1                            | 2                        | 3                        | 4                        | 5                        |                          |
| <input type="checkbox"/>     | <input type="checkbox"/> | <input type="checkbox"/> | <input type="checkbox"/> | <input type="checkbox"/> | <input type="checkbox"/> |

2.9 Ich fühlte mich in der Benutzung des Programms (Reduct-Web-App) sehr sicher.

| Stimme<br>überhaupt nicht zu |                          |                          |                          |                          | Stimme<br>voll zu        |
|------------------------------|--------------------------|--------------------------|--------------------------|--------------------------|--------------------------|
| 1                            | 2                        | 3                        | 4                        | 5                        |                          |
| <input type="checkbox"/>     | <input type="checkbox"/> | <input type="checkbox"/> | <input type="checkbox"/> | <input type="checkbox"/> | <input type="checkbox"/> |

2.10 Ich musste eine Menge lernen, ehe ich anfangen konnte, das Programm (Reduct-Web-App) zu verwenden.

| Stimme<br>überhaupt nicht zu |                          |                          |                          |                          | Stimme<br>voll zu        |
|------------------------------|--------------------------|--------------------------|--------------------------|--------------------------|--------------------------|
| 1                            | 2                        | 3                        | 4                        | 5                        |                          |
| <input type="checkbox"/>     | <input type="checkbox"/> | <input type="checkbox"/> | <input type="checkbox"/> | <input type="checkbox"/> | <input type="checkbox"/> |



### 3. Bewertung von Gesundheitsanwendungen für das Smartphone (Survey for Rating Healthcare Smartphone Applications)

|                                                                                                                     | Gar nicht<br>zutreffend | Ein wenig<br>zutreffen | Großenteils<br>zutreffend | Immer<br>zutreffen |
|---------------------------------------------------------------------------------------------------------------------|-------------------------|------------------------|---------------------------|--------------------|
| 4.1. Die in der Reduct-Web-App bereitgestellten Informationen sind korrekt (es gibt keine ungenauen Informationen). | 1                       | 2                      | 3                         | 4                  |
| 4.2. In der Reduct-Web-App werden klare Informationen bereitgestellt.                                               | 1                       | 2                      | 3                         | 4                  |
| 4.3. Die Gesundheitsinformationen in dem Programm sind leicht verständlich.                                         | 1                       | 2                      | 3                         | 4                  |
| 4.4. Die in der Reduct-Web-App bereitgestellten Gesundheitsinformationen werden in Alltagssprache erklärt.          | 1                       | 2                      | 3                         | 4                  |
| 4.5. Die in der Reduct-Web-App bereitgestellten Informationen sind für Nutzer im Allgemeinen leicht zu lesen.       | 1                       | 2                      | 3                         | 4                  |
| 4.6. Es werden professionelle Gesundheitsinformationen zur Verfügung gestellt.                                      | 1                       | 2                      | 3                         | 4                  |
| 4.7. Gesundheitsinformationen werden systematisch vermittelt.                                                       | 1                       | 2                      | 3                         | 4                  |
| 4.8. Es ist ersichtlich, dass die Gesundheitsinformationen aus verlässlichen Quellen zitiert werden                 | 1                       | 2                      | 3                         | 4                  |
| 4.9. Die bereitgestellten Gesundheitsinformationen stammen von medizinischen Experten.                              | 1                       | 2                      | 3                         | 4                  |
| 4.10. Das Programm ist kohärent/einheitlich in Bezug auf Farbe, Konfiguration und Ausdrucksweise.                   | 1                       | 2                      | 3                         | 4                  |



# Reduct

20

|                                                                                                    |   |   |   |   |
|----------------------------------------------------------------------------------------------------|---|---|---|---|
| 4.11. Die Anordnung der Symbole steht im Einklang mit dem gesamten Design des Programms.           | 1 | 2 | 3 | 4 |
| 4.12. Icons/Symbole werden in dem Programm einheitlich kategorisiert.                              | 1 | 2 | 3 | 4 |
| 4.13. Die Inhalte sind gut organisiert, so dass sie zugänglich und logisch verständlich sind.      | 1 | 2 | 3 | 4 |
| 4.14. Die Bedeutung der einzelnen Icons/Symbole wird deutlich zum Ausdruck gebracht.               | 1 | 2 | 3 | 4 |
| 4.15. Die Reduct-Web-App hat eine gut lesbare Schrift/Schriftart.                                  | 1 | 2 | 3 | 4 |
| 4.16. Visuelle Elemente verwirren den Nutzer nicht.                                                | 1 | 2 | 3 | 4 |
| 4.17. Die Struktur der Reduct-Web-App ist klar ersichtlich.                                        | 1 | 2 | 3 | 4 |
| 4.18. Anweisungen werden kurz und bündig formuliert.                                               | 1 | 2 | 3 | 4 |
| 4.19. Anweisungen werden präzise erteilt.                                                          | 1 | 2 | 3 | 4 |
| 4.20. Alle Wörter/ Sätze sind nicht nur korrekt geschrieben, sondern auch grammatikalisch korrekt. | 1 | 2 | 3 | 4 |

# Reduct

21

4.21. Die Reduct-Web-App liefert Informationen zum Thema Datenschutz.

1                      2                      3                      4

4.22. Die Reduct-Web-App liefert Informationen über Sicherheitsrichtlinien in Bezug auf persönliche Gesundheitsinformationen.

1                      2                      3                      4

4.23. Die Reduct-Web-App erklärte das Sicherheitssystem zur Schaffung einer sicheren Umgebung für eine bessere Nutzung der mobilen App.

1                      2                      3                      4

## 4. Allgemeine Fragen

### 4.1. Fanden Sie die visuelle Darstellung der Module in der Reduct-Web-App ansprechend?

|                             |                          |                          |                          |                          |
|-----------------------------|--------------------------|--------------------------|--------------------------|--------------------------|
| <input type="checkbox"/>    | <input type="checkbox"/> | <input type="checkbox"/> | <input type="checkbox"/> | <input type="checkbox"/> |
| 1                           | 2                        | 3                        | 4                        | 5                        |
| überhaupt nicht ansprechend | eher weniger ansprechend | mäßig ansprechend        | eher ansprechend         | sehr ansprechend         |

### 4.2. Waren die Texte klar und verständlich?

|                          |                          |                          |                          |                          |
|--------------------------|--------------------------|--------------------------|--------------------------|--------------------------|
| <input type="checkbox"/> |
| 1                        | 2                        | 3                        | 4                        | 5                        |
| gar nicht verständlich   | eher nicht verständlich  | mäßig verständlich       | eher verständlich        | sehr verständlich        |

**4.3 Fanden Sie die Videos ansprechend?**

|                              |                          |                          |                          |                          |                              |
|------------------------------|--------------------------|--------------------------|--------------------------|--------------------------|------------------------------|
| <input type="checkbox"/>     | <input type="checkbox"/> | <input type="checkbox"/> | <input type="checkbox"/> | <input type="checkbox"/> | <input type="checkbox"/>     |
| 1                            | 2                        | 3                        | 4                        | 5                        | 6                            |
| überhaupt nicht<br>hilfreich | kaum hilfreich           | mäßig hilfreich          | eher hilfreich           | sehr hilfreich           | Kann ich nicht<br>beurteilen |

**4.4. Fanden Sie die Audio-Dateien ansprechend?**

|                                |                             |                          |                          |                          |                              |
|--------------------------------|-----------------------------|--------------------------|--------------------------|--------------------------|------------------------------|
| <input type="checkbox"/>       | <input type="checkbox"/>    | <input type="checkbox"/> | <input type="checkbox"/> | <input type="checkbox"/> | <input type="checkbox"/>     |
| 1                              | 2                           | 3                        | 4                        | 5                        | 6                            |
| überhaupt nicht<br>ansprechend | eher weniger<br>ansprechend | mäßig<br>ansprechend     | eher<br>ansprechend      | sehr ansprechend         | Kann ich nicht<br>beurteilen |

**4.5. Fanden Sie die Belohnungen ansprechend?**

|                                |                             |                          |                          |                          |                              |
|--------------------------------|-----------------------------|--------------------------|--------------------------|--------------------------|------------------------------|
| <input type="checkbox"/>       | <input type="checkbox"/>    | <input type="checkbox"/> | <input type="checkbox"/> | <input type="checkbox"/> | <input type="checkbox"/>     |
| 1                              | 2                           | 3                        | 4                        | 5                        | 6                            |
| überhaupt nicht<br>ansprechend | eher weniger<br>ansprechend | mäßig<br>ansprechend     | eher<br>ansprechend      | sehr ansprechend         | Kann ich nicht<br>beurteilen |

**4.6. Fanden Sie die Übungen hilfreich?**

|                              |                          |                          |                          |                          |                              |
|------------------------------|--------------------------|--------------------------|--------------------------|--------------------------|------------------------------|
| <input type="checkbox"/>     | <input type="checkbox"/> | <input type="checkbox"/> | <input type="checkbox"/> | <input type="checkbox"/> | <input type="checkbox"/>     |
| 1                            | 2                        | 3                        | 4                        | 5                        | 6                            |
| überhaupt nicht<br>hilfreich | kaum hilfreich           | mäßig hilfreich          | eher hilfreich           | sehr hilfreich           | Kann ich nicht<br>beurteilen |

**4.7. Sind Sie mit der Plattform „Reduct-Web-App“ zufrieden?**

|                              |                          |                          |                          |                          |
|------------------------------|--------------------------|--------------------------|--------------------------|--------------------------|
| <input type="checkbox"/>     | <input type="checkbox"/> | <input type="checkbox"/> | <input type="checkbox"/> | <input type="checkbox"/> |
| 1                            | 2                        | 3                        | 4                        | 5                        |
| überhaupt nicht<br>zufrieden | Kaum zufrieden           | mäßig zufrieden          | Eher zufrieden           | Sehr zufrieden           |

**4.8. Hat die Plattform dir Sicherheit im Umgang mit deinen persönlichen Daten vermittelt?**

|                               |                            |                          |                          |                          |
|-------------------------------|----------------------------|--------------------------|--------------------------|--------------------------|
| <input type="checkbox"/>      | <input type="checkbox"/>   | <input type="checkbox"/> | <input type="checkbox"/> | <input type="checkbox"/> |
| 1                             | 2                          | 3                        | 4                        | 5                        |
| überhaupt nicht<br>zutreffend | eher weniger<br>zutreffend | mäßig zutreffend         | eher zutreffend          | sehr zutreffend          |

**4.9. Würden Sie die Reduct-Web-App an andere Betroffene weiterempfehlen?**

ja                       nein

**4.10. Würden Sie die Reduct-Web-App zukünftig nutzen?**

ja                       nein

**4.11. Inwiefern denken Sie, dass Sie persönlich von unserer Reduct-Web-App profitiert haben?**

|                          |                          |                          |                          |                          |
|--------------------------|--------------------------|--------------------------|--------------------------|--------------------------|
| <input type="checkbox"/> |
| 1                        | 2                        | 3                        | 4                        | 5                        |
| überhaupt nicht          | kaum                     | mäßig                    | eher                     | Sehr                     |

**4.12. Wurden Sie durch die Plattform „Reduct-Web-App“ motiviert, dass Training weiterzuführen?**

|                           |                          |                          |                          |                          |
|---------------------------|--------------------------|--------------------------|--------------------------|--------------------------|
| <input type="checkbox"/>  | <input type="checkbox"/> | <input type="checkbox"/> | <input type="checkbox"/> | <input type="checkbox"/> |
| 1                         | 2                        | 3                        | 4                        | 5                        |
| Trifft überhaupt nicht zu | Trifft eher weniger zu   | Trifft mäßig zu          | Trifft eher zu           | Trifft vollkommen zu     |

**4.13. Konnten Sie die Nutzung der Reduct-Web-App gut in Ihren Alltag einbauen?**

|                          |                          |                          |                          |                          |
|--------------------------|--------------------------|--------------------------|--------------------------|--------------------------|
| <input type="checkbox"/> |
| überhaupt nicht gut      | Weniger gut              | mäßig                    | Eher gut                 | Sehr gut                 |

**4.14. Konnten Sie sich gut auf die Inhalte konzentrieren, wenn Sie das Training genutzt haben?**

|                           |                          |                          |                          |                          |
|---------------------------|--------------------------|--------------------------|--------------------------|--------------------------|
| <input type="checkbox"/>  | <input type="checkbox"/> | <input type="checkbox"/> | <input type="checkbox"/> | <input type="checkbox"/> |
| 1                         | 2                        | 3                        | 4                        | 5                        |
| Trifft überhaupt nicht zu | Trifft eher weniger zu   | Trifft teilweise zu      | Trifft eher zu           | Trifft vollkommen zu     |

**5.15. Hat Ihnen die Reduct-Web-App dabei geholfen mit krankheitsbezogenen Belastungen besser umzugehen?**

|                           |                          |                          |                          |                          |
|---------------------------|--------------------------|--------------------------|--------------------------|--------------------------|
| <input type="checkbox"/>  | <input type="checkbox"/> | <input type="checkbox"/> | <input type="checkbox"/> | <input type="checkbox"/> |
| 1                         | 2                        | 3                        | 4                        | 5                        |
| Trifft überhaupt nicht zu | Trifft eher weniger zu   | Trifft teilweise zu      | Trifft eher zu           | Trifft vollkommen zu     |

**4.16. Geben Sie hierunter an, inwieweit Sie das jeweilige in der Reduct-Web-App behandelte Thema als für Sie persönlich relevant im Umgang mit Ihrer Krebserkrankung empfunden haben.**

|                                | Überhaupt<br>nicht<br>relevant | Wenig<br>relevant | Mäßig<br>relevant | Eher<br>relevant | Sehr<br>relevant | Kann ich<br>nicht<br>beurteilen |
|--------------------------------|--------------------------------|-------------------|-------------------|------------------|------------------|---------------------------------|
| Gesundheitsbezogenes Verhalten | 1                              | 2                 | 3                 | 4                | 5                | 6                               |
| Gefühle                        | 1                              | 2                 | 3                 | 4                | 5                | 6                               |
| Kreativität                    | 1                              | 2                 | 3                 | 4                | 5                | 6                               |
| Schmerzerleben                 | 1                              | 2                 | 3                 | 4                | 5                | 6                               |
| Angst                          | 1                              | 2                 | 3                 | 4                | 5                | 6                               |
| Kraftquellen                   | 1                              | 2                 | 3                 | 4                | 5                | 6                               |
| Positivität                    | 1                              | 2                 | 3                 | 4                | 5                | 6                               |
| Körpergefühl                   | 1                              | 2                 | 3                 | 4                | 5                | 6                               |
| Bewegung und Entspannung       | 1                              | 2                 | 3                 | 4                | 5                | 6                               |
| Stressmanagement               | 1                              | 2                 | 3                 | 4                | 5                | 6                               |
| Schlaf                         | 1                              | 2                 | 3                 | 4                | 5                | 6                               |
| Selbstzuwendung                | 1                              | 2                 | 3                 | 4                | 5                | 6                               |
| Beziehungen                    | 1                              | 2                 | 3                 | 4                | 5                | 6                               |

**4.17 Beschreiben Sie kurz in Ihren eigenen Worten, inwiefern die Reduct-Web-App Ihnen im Umgang mit den Belastungen im Rahmen Ihrer Krebserkrankung geholfen hat.**



### III. Fragen zur Beschäftigung mit Achtsamkeit und der Reduct-Web-App

**1) Bitte geben Sie an, wie häufig Sie während der Laufzeit der Reduct-Web-App Achtsamkeitsübungen in Ihren Alltag eingebaut haben.**

|                          |                          |                          |                          |                          |                          |
|--------------------------|--------------------------|--------------------------|--------------------------|--------------------------|--------------------------|
| <input type="checkbox"/> |
| 1                        | 2                        | 3                        | 4                        | 5                        | 6                        |
| (fast) nie               | Ca. einmal im Monat      | Mehrmals im Monat        | Ca. einmal in der Woche  | Mehrmals in der Woche    | (fast) täglich           |

**2) Konnten Sie die in der Reduct-Web-App erlernten Strategien/Skills in Ihren Alltag integrieren?**

|                          |                          |                          |                          |                          |                          |
|--------------------------|--------------------------|--------------------------|--------------------------|--------------------------|--------------------------|
| <input type="checkbox"/> |
| 1                        | 2                        | 3                        | 4                        | 5                        | 6                        |
| (fast) nie               | Ca. einmal im Monat      | Mehrmals im Monat        | Ca. einmal in der Woche  | Mehrmals in der Woche    | (fast) täglich           |

**IV Fragen zur psychotherapeutischen/psychopharmakologischen Behandlung****1) Nehmen Sie aktuell Medikamente gegen Ängste, Depression oder Schlafstörungen ein?**

- Nein
- Ja, folgende: \_\_\_\_\_
- Dosis \_\_\_\_\_
- Seit wann? \_\_\_\_\_

**2) Sind Sie aktuell in psychotherapeutischer/psychiatrischer Behandlung?**

- Nein
- Ja

Wie viele Sitzungen haben stattgefunden? \_\_\_\_\_ Sitzungen

**3) Haben Sie in den letzten vier Monaten regelmäßige (mindestens 1x pro Woche, für mindestens 4 Wochen) psychoonkologische Termine in der Klinik, bei einem ambulanten Psychoonkologen, oder in einer Krebsberatungsstelle gehabt?**

- Nein
- Ja





Liebe Teilnehmerin, lieber Teilnehmer,

vielen Dank für Ihre Teilnahme an der zweiten Befragung. Wir würden uns freuen, wenn Sie weiterhin an unserer Studie teilnehmen, indem Sie zwei weitere Fragebögen bearbeiten. Hierzu werden wir Sie in jeweils 3 und 6 Monaten benachrichtigen. Die Bearbeitung wird deutlich weniger Zeit in Anspruch nehmen, als die Bearbeitung der ersten beiden Fragebögen.

Sollten Sie Fragen haben, können Sie gerne jederzeit eine E-Mail an [reduct@uni-due.de](mailto:reduct@uni-due.de) senden.

Auf diesem Wege wünschen wir Ihnen weiterhin alles Gute.

Ihr Reduct Team

Teilnehmer-ID: \_\_\_\_\_

## Reduct- Web-Basierte Achtsamkeits- und Skillsbasierte Stressreduktion für Patientinnen und Patienten mit Krebs

Liebe Teilnehmerin, lieber Teilnehmer,

willkommen zurück! Mittlerweile sind einige Wochen vergangen, seitdem Sie die Reduct-Web-App genutzt haben. Wir hoffen, dass Sie die Inhalte des online Trainings weiterhin in Ihrem Alltag begleiten. Vielleicht haben Sie diese immer mal wieder hilfreich erlebt oder sind seitdem achtsamer in Ihrem Alltag. Dies ist der vorletzte Fragebogen, Sie werden etwa 10-15 Minuten zur Bearbeitung benötigen.

Sollten Sie Fragen haben, können Sie gerne jederzeit eine E-Mail an [reduct@uni-due.de](mailto:reduct@uni-due.de) senden.

Wenn Sie merken, dass Sie sich sehr belastet fühlen und Sie mehr Unterstützung bei der Bewältigung Ihrer Erkrankung benötigen, können Sie sich jederzeit an die/den Studienverantwortliche/n Ihres Zentrums wenden. Diese/r kann Ihnen bei der Suche psychoonkologischer Hilfsangebote zur Seite stehen.

Vielen Dank für Ihre Teilnahme und Unterstützung!

Ihr Reduct Team

\*Kontaktdaten

[2]

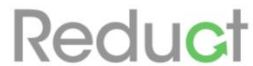

## I. Fragen zu Ihrem derzeitigen Befinden

### 1. Angst und Stresserleben

Bitte beantworten Sie im Folgenden, wie sehr die jeweilige Aussage in der letzten Woche auf Sie zutraf.

1.1. Ich fühle mich angespannt oder überreizt.

- 3 meistens
- 2 oft
- 1 von Zeit zu Zeit/ gelegentlich
- 0 überhaupt nicht

1.2. Ich fühle mich in meinen Aktivitäten gebremst.

- 3 fast immer
- 2 sehr oft
- 1 manchmal
- 0 überhaupt nicht

1.3. Ich kann mich heute noch so freuen wie früher.

- 0 ganz genau so
- 1 nicht ganz so sehr
- 2 Nur noch ein wenig
- 3 kaum oder gar nicht

1.4. Ich habe manchmal ein ängstliches Gefühl in der Magengegend.

- 0 überhaupt nicht
- 1 gelegentlich
- 2 ziemlich oft
- 3 sehr oft

1.5. Mich überkommt eine ängstliche Vorahnung, dass etwas Schreckliches passieren könnte.

- 3 ja, sehr stark
- 2 ja, aber nicht allzu stark
- 1 etwas, aber es macht mir keine Sorgen
- 0 überhaupt nicht

1.6. Ich habe das Interesse an meiner äußeren Erscheinung verloren.

- 3 ja, stimmt genau
- 2 ich kümmere mich nicht so sehr darum, wie ich sollte
- 1 möglicherweise kümmere ich mich zu wenig darum
- 0 ich kümmere mich so viel darum wie immer

1.7. Ich kann lachen und die lustige Seite der Dinge sehen.

- 0 ja, so viel wie immer
- 1 nicht mehr ganz so viel
- 2 inzwischen viel weniger
- 3 überhaupt nicht

1.8. Ich fühle mich rastlos, muss immer in Bewegung sein.

- 3 ja, tatsächlich sehr
- 2 ziemlich
- 1 nicht sehr
- 0 überhaupt nicht

# Reduct

3

1.9. Mir gehen beunruhigende Gedanken durch den Kopf.

- 3 einen Großteil der Zeit
- 2 verhältnismäßig oft
- 1 von Zeit zu Zeit, aber nicht allzu oft
- 0 nur gelegentlich/nie

1.10. Ich blicke mit Freude in die Zukunft.

- 0 ja, sehr
- 1 eher weniger als früher
- 2 viel weniger als früher
- 3 kaum bis gar nicht

1.11. Ich fühle mich glücklich.

- 3 überhaupt nicht
- 2 selten
- 1 manchmal
- 0 meistens

1.12. Mich überkommt plötzlich ein panikartiger Zustand.

- 3 ja, tatsächlich sehr oft
- 2 ziemlich oft
- 1 nicht sehr oft
- 0 überhaupt nicht

1.13. Ich kann behaglich dasitzen und mich entspannen.

- 0 ja, natürlich
- 1 gewöhnlich schon
- 2 nicht oft
- 3 überhaupt nicht

1.14. Ich kann mich an einem guten Buch, einer Radio- oder Fernsehsendung erfreuen.

- 0 oft
- 1 manchmal
- 2 Eher selten
- 3 Sehr selten

## 2. Belastungsthermometer

Bitte markieren Sie am Thermometer die Zahl, die am besten beschreibt, wie belastet Sie sich in der letzten Woche einschließlich heute gefühlt haben.

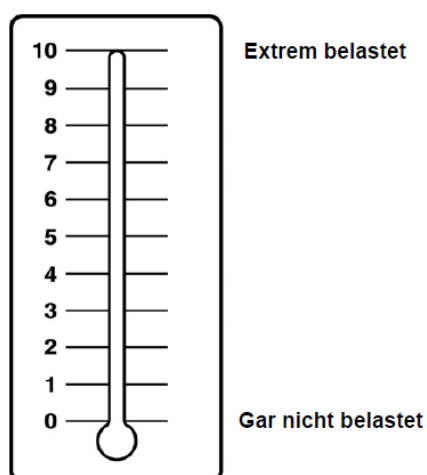

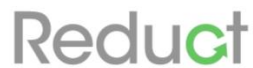

### 3. Skala zur Allgemeinen Selbstwirksamkeitserwartung

Kreuzen Sie bitte bei jeder Frage die Antwort an, die am besten auf Sie zutrifft.

|                                                                                                    | Stimmt<br>nicht | Stimmt<br>kaum | Stimmt<br>eher | Stimmt<br>genau |
|----------------------------------------------------------------------------------------------------|-----------------|----------------|----------------|-----------------|
| 3.1. Wenn sich Widerstände auftun, finde ich Mittel und Wege, mich durchzusetzen.                  | 1               | 2              | 3              | 4               |
| 3.2. Die Lösung schwieriger Probleme gelingt mir immer, wenn ich mich darum bemühe.                | 1               | 2              | 3              | 4               |
| 3.3. Es bereitet mir keine Schwierigkeiten, meine Absichten und Ziele zu verwirklichen.            | 1               | 2              | 3              | 4               |
| 3.4. In unerwarteten Situationen weiß ich immer, wie ich mich verhalten soll.                      | 1               | 2              | 3              | 4               |
| 3.5. Auch bei überraschenden Ereignissen glaube ich, dass ich gut mit ihnen zurechtkommen kann.    | 1               | 2              | 3              | 4               |
| 3.6. Schwierigkeiten sehe ich gelassen entgegen, weil ich meinen Fähigkeiten immer vertrauen kann. | 1               | 2              | 3              | 4               |
| 3.7. Was auch immer passiert, ich werde schon klarkommen.                                          | 1               | 2              | 3              | 4               |
| 3.8. Für jedes Problem kann ich eine Lösung finden.                                                | 1               | 2              | 3              | 4               |
| 3.9. Wenn eine neue Sache auf mich zukommt, weiß ich, wie ich damit umgehen kann.                  | 1               | 2              | 3              | 4               |
| 3.10. Wenn ein Problem auftaucht, kann ich es aus eigener Kraft meistern.                          | 1               | 2              | 3              | 4               |



#### 4. Lebensqualität (EORT-QLQ-C30)

Bitte kreuzen Sie im Folgenden Abschnitt die Zahl von 1 bis 4 an, die am besten auf Sie zutrifft.

|                                                                                                                                      | Überhaupt<br>nicht | Wenig | Mäßig | Sehr |
|--------------------------------------------------------------------------------------------------------------------------------------|--------------------|-------|-------|------|
| 4.1. Bereitet es Ihnen Schwierigkeiten, sich körperlich anzustrengen (z.B. eine schwere Einkaufstasche oder einen Koffer zu tragen)? | 1                  | 2     | 3     | 4    |
| 4.2. Bereitet es Ihnen Schwierigkeiten, einen <u>längeren</u> Spaziergang zu machen?                                                 | 1                  | 2     | 3     | 4    |
| 4.3. Bereitet es Ihnen Schwierigkeiten, eine <u>kurze</u> Strecke außer Haus zu gehen?                                               | 1                  | 2     | 3     | 4    |
| 4.4. Müssen Sie tagsüber im Bett liegen oder in einem Sessel sitzen?                                                                 | 1                  | 2     | 3     | 4    |
| 4.5. Brauchen Sie Hilfe beim Essen, Anziehen, Waschen oder Benutzen der Toilette?                                                    | 1                  | 2     | 3     | 4    |
| <b>Während der letzten Woche:</b>                                                                                                    |                    |       |       |      |
|                                                                                                                                      | Überhaupt<br>nicht | Wenig | Mäßig | Sehr |
| 4.6. Waren Sie bei Ihrer Arbeit oder bei anderen tagtäglichen Beschäftigungen eingeschränkt?                                         | 1                  | 2     | 3     | 4    |
| 4.7. Waren Sie bei Ihren Hobbys oder andere Freizeitbeschäftigungen eingeschränkt?                                                   | 1                  | 2     | 3     | 4    |
| 4.8. Waren Sie kurzatmig?                                                                                                            | 1                  | 2     | 3     | 4    |
| 4.9. Hatten Sie Schmerzen?                                                                                                           | 1                  | 2     | 3     | 4    |
| 4.10. Mussten Sie sich ausruhen?                                                                                                     | 1                  | 2     | 3     | 4    |
| 4.11. Hatten Sie Schlafstörungen?                                                                                                    | 1                  | 2     | 3     | 4    |

# Reduct

6

4.12. Fühlten Sie sich schwach?

|   |   |   |   |
|---|---|---|---|
| 1 | 2 | 3 | 4 |
|---|---|---|---|

**Während der letzten Woche:**

| <b>Überhaupt nicht</b> | <b>Wenig</b> | <b>Mäßig</b> | <b>Sehr</b> |
|------------------------|--------------|--------------|-------------|
|------------------------|--------------|--------------|-------------|

4.13. Hatten Sie Appetitmangel?

|   |   |   |   |
|---|---|---|---|
| 1 | 2 | 3 | 4 |
|---|---|---|---|

4.14. War Ihnen übel?

|   |   |   |   |
|---|---|---|---|
| 1 | 2 | 3 | 4 |
|---|---|---|---|

4.15. Haben Sie erbrochen?

|   |   |   |   |
|---|---|---|---|
| 1 | 2 | 3 | 4 |
|---|---|---|---|

4.16. Hatten Sie Verstopfung?

|   |   |   |   |
|---|---|---|---|
| 1 | 2 | 3 | 4 |
|---|---|---|---|

4.17. Hatten Sie Durchfall?

|   |   |   |   |
|---|---|---|---|
| 1 | 2 | 3 | 4 |
|---|---|---|---|

4.18. Waren Sie müde?

|   |   |   |   |
|---|---|---|---|
| 1 | 2 | 3 | 4 |
|---|---|---|---|

4.19. Fühlten Sie sich durch Schmerzen in Ihrem alltäglichen Leben beeinträchtigt?

|   |   |   |   |
|---|---|---|---|
| 1 | 2 | 3 | 4 |
|---|---|---|---|

4.20. Hatten Sie Schwierigkeiten, sich auf etwas zu konzentrieren, z.B. auf das Zeitungslesen oder das Fernsehen?

|   |   |   |   |
|---|---|---|---|
| 1 | 2 | 3 | 4 |
|---|---|---|---|

4.21. Fühlten Sie sich angespannt?

|   |   |   |   |
|---|---|---|---|
| 1 | 2 | 3 | 4 |
|---|---|---|---|

4.22. Haben Sie sich Sorgen gemacht?

|   |   |   |   |
|---|---|---|---|
| 1 | 2 | 3 | 4 |
|---|---|---|---|

4.23. Waren Sie reizbar?

|   |   |   |   |
|---|---|---|---|
| 1 | 2 | 3 | 4 |
|---|---|---|---|

4.24. Fühlten Sie sich niedergeschlagen?

|   |   |   |   |
|---|---|---|---|
| 1 | 2 | 3 | 4 |
|---|---|---|---|

4.25. Hatten Sie Schwierigkeiten, sich an Dinge zu erinnern?

|   |   |   |   |
|---|---|---|---|
| 1 | 2 | 3 | 4 |
|---|---|---|---|

4.26. Hat Ihr körperlicher Zustand oder Ihre medizinische Behandlung Ihr Familienleben beeinträchtigt?

|   |   |   |   |
|---|---|---|---|
| 1 | 2 | 3 | 4 |
|---|---|---|---|

# Reduct

7

4.27. Hat Ihr körperlicher Zustand oder Ihre medizinische Behandlung Ihr Zusammensein oder Ihre gemeinsamen Unternehmungen mit anderen Menschen beeinträchtigt?

1                      2                      3                      4

4.28. Hat Ihr körperlicher Zustand oder Ihre medizinische Behandlung für Sie finanzielle Schwierigkeiten mit sich gebracht?

1                      2                      3                      4

**Bitte kreuzen Sie bei den folgenden Fragen die Zahl zwischen 1 und 7 an, die am besten auf Sie zutrifft.**

4.29. Wie würden Sie insgesamt Ihren Gesundheitszustand während der letzten Woche einschätzen?

1                      2                      3                      4                      5                      6                      7  
sehr schlechtausgezeichnet

4.30. Wie würden Sie insgesamt Ihre Lebensqualität während der letzten Woche einschätzen?

1                      2                      3                      4                      5                      6                      7  
sehr schlechtausgezeichnet





## 5. Lebensqualität (EQ-5D-5L)

Bitte kreuzen Sie unter jeder Überschrift das Kästchen an, das Ihren Gesundheitszustand heute am besten beschreibt.

### 5.1. Beweglichkeit/Mobilität

- |                                         |   |
|-----------------------------------------|---|
| Ich habe keine Probleme herumzugehen    | 1 |
| Ich habe leichte Probleme herumzugehen  | 2 |
| Ich habe mäßige Probleme herumzugehen   | 3 |
| Ich habe große Probleme herumzugehen    | 4 |
| Ich bin nicht in der Lage, herumzugehen | 5 |

### 5.2. Für sich selbst sorgen

- |                                                                   |   |
|-------------------------------------------------------------------|---|
| Ich habe keine Probleme, mich selbst zu waschen oder anzuziehen   | 1 |
| Ich habe leichte Probleme, mich selbst zu waschen oder anzuziehen | 2 |
| Ich habe mäßige Probleme, mich selbst zu waschen oder anzuziehen  | 3 |
| Ich habe große Probleme, mich selbst zu waschen oder anzuziehen   | 4 |
| Ich bin nicht in der Lage, mich selbst zu waschen oder anzuziehen | 5 |

### 5.3. Alltägliche Tätigkeiten (z.B. Arbeit, Studium, Hausarbeit, Familien- oder Freizeitaktivitäten)

- |                                                                        |   |
|------------------------------------------------------------------------|---|
| Ich habe keine Probleme, meinen alltäglichen Tätigkeiten nachzugehen   | 1 |
| Ich habe leichte Probleme, meinen alltäglichen Tätigkeiten nachzugehen | 2 |
| Ich habe mäßige Probleme, meinen alltäglichen Tätigkeiten nachzugehen  | 3 |
| Ich habe große Probleme, meinen alltäglichen Tätigkeiten nachzugehen   | 4 |
| Ich bin nicht in der Lage, meinen alltäglichen Tätigkeiten nachzugehen | 5 |

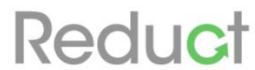**5.4. Schmerzen/Körperliche Beschwerden**

|                                             |   |
|---------------------------------------------|---|
| Ich habe keine Schmerzen oder Beschwerden   | 1 |
| Ich habe leichte Schmerzen oder Beschwerden | 2 |
| Ich habe mäßige Schmerzen oder Beschwerden  | 3 |
| Ich habe starke Schmerzen oder Beschwerden  | 4 |
| Ich habe extreme Schmerzen oder Beschwerden | 5 |

**5.5. Angst/Niedergeschlagenheit**

|                                             |   |
|---------------------------------------------|---|
| Ich bin nicht ängstlich oder deprimiert     | 1 |
| Ich bin ein wenig ängstlich oder deprimiert | 2 |
| Ich bin mäßig ängstlich oder deprimiert     | 3 |
| Ich bin sehr ängstlich oder deprimiert      | 4 |
| Ich bin extrem ängstlich oder deprimiert    | 5 |

## Reduct

5.6 Um Sie bei der Einschätzung, wie gut oder wie schlecht Ihr Gesundheitszustand ist, zu unterstützen, haben wir eine Skala gezeichnet, ähnlich einem Thermometer. Der best denkbare Gesundheitszustand ist mit einer "100" gekennzeichnet, der schlechteste mit "0".

Wir möchten Sie nun bitten, auf dieser Skala zu kennzeichnen, wie gut oder schlecht Ihrer Ansicht nach Ihr persönlicher Gesundheitszustand heute ist. Bitte verbinden Sie dazu den untenstehenden Kasten mit dem Punkt auf der Skala, der Ihren heutigen Gesundheitszustand am besten wiedergibt.

**Ihr heutiger  
Gesundheitszustand**

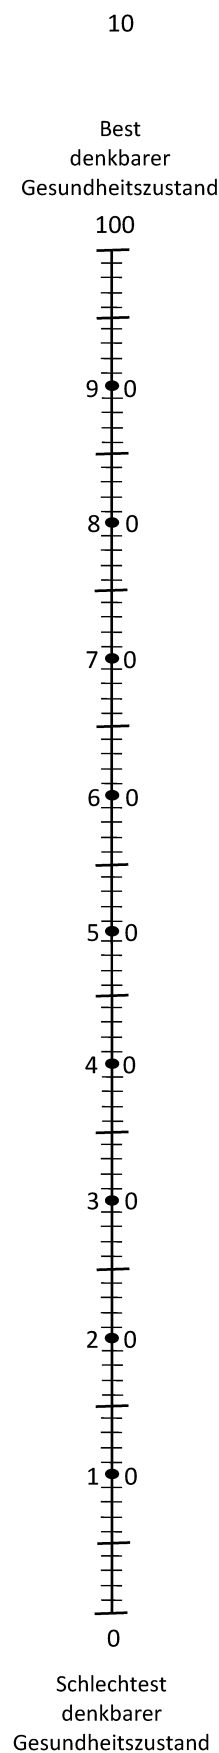

# Reduct

11

## 6. Achtsamkeit (FFA)

Dieser Fragebogen soll Ihre Achtsamkeit erfassen. Bitte beziehen Sie dabei die Aussagen auf die letzten 14 Tage. Kreuzen Sie bitte bei jeder Frage die Antwort an, die am besten auf Sie zutrifft.

|                                                                                                             | Fast nie | Eher selten | Relativ oft | Fast immer |
|-------------------------------------------------------------------------------------------------------------|----------|-------------|-------------|------------|
| 6.1. Ich bin offen für die Erfahrung des Augenblicks.                                                       | 1        | 2           | 3           | 4          |
| 6.2. Ich spüre in meinen Körper hinein, sei es beim Essen, Kochen, Putzen, Reden.                           | 1        | 2           | 3           | 4          |
| 6.3. Wenn ich merke, dass ich abwesend war, kehre ich sanft zur Erfahrung des Augenblicks zurück.           | 1        | 2           | 3           | 4          |
| 6.4. Ich kann mich selbst wertschätzen.                                                                     | 1        | 2           | 3           | 4          |
| 6.5. Ich achte auf die Motive meiner Handlungen.                                                            | 1        | 2           | 3           | 4          |
| 6.6. Ich sehe meine Fehler und Schwierigkeiten, ohne mich zu verurteilen.                                   | 1        | 2           | 3           | 4          |
| 6.7. Ich bin in Kontakt mit meinen Erfahrungen, hier und jetzt.                                             | 1        | 2           | 3           | 4          |
| 6.8. Ich nehme unangenehme Erfahrungen an.                                                                  | 1        | 2           | 3           | 4          |
| 6.9. Ich bin mir selbst gegenüber freundlich, wenn Dinge schief laufen.                                     | 1        | 2           | 3           | 4          |
| 6.10. Ich beobachte meine Gefühle, ohne mich in ihnen zu verlieren.                                         | 1        | 2           | 3           | 4          |
| 6.11. In schwierigen Situationen kann ich innehalten.                                                       | 1        | 2           | 3           | 4          |
| 6.12. Ich erlebe Momente innerer Ruhe und Gelassenheit, selbst wenn äußerlich Schmerzen und Unruhe da sind. | 1        | 2           | 3           | 4          |
| 6.13. Ich bin ungeduldig mit mir und meinen Mitmenschen.                                                    | 4        | 3           | 2           | 1          |
| 6.14. Ich kann darüber lächeln, wenn ich sehe, wie ich mir manchmal das Leben schwer mache.                 | 1        | 2           | 3           | 4          |

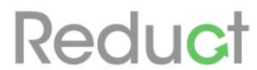

**7. Wie oft fühlten Sie sich im Verlauf der letzten 2 Wochen durch die folgenden Beschwerden beeinträchtigt? (PHQ-4)**

|                                                                      | <b>Überhaupt nicht</b> | <b>An einzelnen Tagen</b> | <b>An mehr als der Hälfte der Tage</b> | <b>Beinahe jeden Tag</b> |
|----------------------------------------------------------------------|------------------------|---------------------------|----------------------------------------|--------------------------|
| 7.1. Wenig Interesse oder Freude an Ihren Tätigkeiten                | 0                      | 1                         | 2                                      | 3                        |
| 7.2. Niedergeschlagenheit, Schwermut oder Hoffnungslosigkeit         | 0                      | 1                         | 2                                      | 3                        |
| 7.3. Nervosität, Ängstlichkeit oder Anspannung                       | 0                      | 1                         | 2                                      | 3                        |
| 7.4. Nicht in der Lage sein, Sorgen zu stoppen oder zu kontrollieren | 0                      | 1                         | 2                                      | 3                        |



## 8. Skills

Kreuzen Sie bitte bei jeder Frage die Antwort an, die am besten auf Sie zutrifft.

|                                                                                                               | Stimmt<br>überhaupt<br>nicht |   | Neutral |   | Stimmt<br>voll-<br>kommen |
|---------------------------------------------------------------------------------------------------------------|------------------------------|---|---------|---|---------------------------|
| 8.1. In belastenden Situationen kann ich mich aufmuntern, indem ich meine Gedanken auf positive Dinge richte. | 1                            | 2 | 3       | 4 | 5                         |
| 8.2. Meine Gedanken geben mir im Umgang mit stressigen Situationen Kraft.                                     | 1                            | 2 | 3       | 4 | 5                         |
| 8.3. Wenn ich belastende Gefühle verspüre, lasse ich sie zu.                                                  | 1                            | 2 | 3       | 4 | 5                         |
| 8.4. Ich kann Dinge annehmen, die ich nicht ändern kann.                                                      | 1                            | 2 | 3       | 4 | 5                         |
| 8.5. Ich überlege mir, was ich im Umgang mit der Krebserkrankung tun kann.                                    | 1                            | 2 | 3       | 4 | 5                         |
| 8.6. Ich führe oft bestimmte Aktivitäten aus, um auf andere Gedanken zu kommen.                               | 1                            | 2 | 3       | 4 | 5                         |
| 8.7. Ich kann mir wohlwollend begegnen.                                                                       | 1                            | 2 | 3       | 4 | 5                         |
| 8.8. Ich kann gut für mich sorgen.                                                                            | 1                            | 2 | 3       | 4 | 5                         |
| 8.9. Ich suche Kontakt zu liebevollen Menschen.                                                               | 1                            | 2 | 3       | 4 | 5                         |
| 8.10. Ich kann nach Unterstützung suchen.                                                                     | 1                            | 2 | 3       | 4 | 5                         |



## II. Achtsamkeit und Nutzung der Reduct-Web-App in der Zwischenzeit

1) Bitte geben Sie an, wie häufig Sie seit der Bearbeitung des letzten Fragebogens bzw. der Reduct-Web-App Achtsamkeitsübungen in Ihren Alltag eingebaut haben.

|                          |                          |                          |                          |                          |                          |
|--------------------------|--------------------------|--------------------------|--------------------------|--------------------------|--------------------------|
| <input type="checkbox"/> |
| 1                        | 2                        | 3                        | 4                        | 5                        | 6                        |
| (fast) nie               | Ca. einmal im Monat      | Mehrmals im Monat        | Ca. einmal in der Woche  | Mehrmals in der Woche    | (fast) täglich           |

2) Konnten Sie die erlernten Strategien/Skills in Ihren Alltag integrieren?

|                          |                          |                          |                          |                          |                          |
|--------------------------|--------------------------|--------------------------|--------------------------|--------------------------|--------------------------|
| <input type="checkbox"/> |
| 1                        | 2                        | 3                        | 4                        | 5                        | 6                        |
| (fast) nie               | Ca. einmal im Monat      | Mehrmals im Monat        | Ca. einmal in der Woche  | Mehrmals in der Woche    | (fast) täglich           |

3) Haben Ihnen die Inhalte der Reduct-Web-App dabei geholfen, mit krankheitsbezogenen Belastungen besser umzugehen?

|                           |                          |                          |                          |                          |
|---------------------------|--------------------------|--------------------------|--------------------------|--------------------------|
| <input type="checkbox"/>  | <input type="checkbox"/> | <input type="checkbox"/> | <input type="checkbox"/> | <input type="checkbox"/> |
| 1                         | 2                        | 3                        | 4                        | 5                        |
| Trifft überhaupt nicht zu | Trifft eher weniger zu   | Trifft teilweise zu      | Trifft eher zu           | Trifft vollkommen zu     |

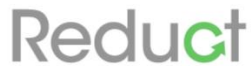

### III. Gesundheitsökonomische Fragen

#### 1. Lag bei Ihnen innerhalb der letzten 3 Monate eine Arbeitsunfähigkeit (AU) vor?

- nein  
 ja

wenn ja, bitte geben Sie den Zeitraum jeder AU mit Datum an und fassen dabei die Dauer für jede zusammenhängende AU (Folgebescheinigungen) wegen derselben Erkrankung zusammen.

1. AU: von \_\_.\_\_.\_\_\_\_(TT.MM.JJJJ) bis \_\_.\_\_.\_\_\_\_(TT.MM.JJJJ)
2. AU: von \_\_.\_\_.\_\_\_\_(TT.MM.JJJJ) bis \_\_.\_\_.\_\_\_\_(TT.MM.JJJJ)
3. AU: von \_\_.\_\_.\_\_\_\_(TT.MM.JJJJ) bis \_\_.\_\_.\_\_\_\_(TT.MM.JJJJ)
4. AU: von \_\_.\_\_.\_\_\_\_(TT.MM.JJJJ) bis \_\_.\_\_.\_\_\_\_(TT.MM.JJJJ)
5. AU: von \_\_.\_\_.\_\_\_\_(TT.MM.JJJJ) bis \_\_.\_\_.\_\_\_\_(TT.MM.JJJJ)

#### 2. Bezogen Sie in den letzten 3 Monaten bzw. beziehen Sie aktuell Krankengeld?

- nein  
 ja

wenn ja, geben Sie bitte den Zeitraum des Krankengeldbezugs an:

von \_\_.\_\_.\_\_\_\_(TT.MM.JJJJ) bis \_\_.\_\_.\_\_\_\_(TT.MM.JJJJ)

#### 3. Hatten Sie innerhalb der letzten 3 Monate Kontakt mit einer ambulanten Arztpraxis (inkl. Rezept/Überweisung abholen, Blutabnahme, telefonische Beratung, Impfung und Hausbesuch)? Bitte beziehen Sie Arztkontakte im Rahmen der Reduct-Studie nicht ein.

- nein  
 ja, welche:

- Hausarzt Anzahl Besuche: \_\_\_\_
- Augenarzt: Anzahl Besuche: \_\_\_\_
- Chirurg: Anzahl Besuche: \_\_\_\_
- Gynäkologe: Anzahl Besuche: \_\_\_\_
- Hautarzt: Anzahl Besuche: \_\_\_\_
- HNO-Arzt: Anzahl Besuche: \_\_\_\_
- psychiatrische Institutsambulanz (PIA) und ambulante Kontakte im psychiatrischen/psychosomatischen Krankenhaus Anzahl Besuche: \_\_\_\_
- Internist (z.B. Onkologe, , Kardiologe, Gastroenterologe, Nephrologe, Diabetologe, Pulmologe, usw.) Anzahl Besuche: \_\_\_\_
- Neurologe: Anzahl Besuche: \_\_\_\_
- Orthopäde: Anzahl Besuche: \_\_\_\_
- Psychiater: Anzahl Besuche: \_\_\_\_





- Psychotherapeut: Anzahl Besuche: \_\_\_\_
- Psychosomatiker: Anzahl Besuche: \_\_\_\_
- Psychoonkologische Behandlung Anzahl Besuche: \_\_\_\_
- Urologe: Anzahl Besuche: \_\_\_\_
- Radiologe: Anzahl Besuche: \_\_\_\_
- Zahnarzt: Anzahl Besuche: \_\_\_\_
- Andere Fachgebiete: \_\_\_\_\_ Anzahl Besuche: \_\_\_\_
- Andere Fachgebiete: \_\_\_\_\_ Anzahl Besuche: \_\_\_\_
- Andere Fachgebiete: \_\_\_\_\_ Anzahl Besuche: \_\_\_\_

#### 4. Hatten Sie einen Krankenhausaufenthalt innerhalb der letzten 3 Monate?

- nein
- ja

wenn ja, geben Sie bitte den Zeitraum des Krankenhausaufenthaltes an und machen Angaben zur Abteilung und Unterbringungsform (sollte sich eine teilstationäre Behandlung an eine stationäre Behandlung angeschlossen haben, werten Sie diese bitte als zwei unterschiedliche Aufenthalte und kreuzen Sie pro Aufenthalt nur „Stationär“ oder „Teilstationär“ an):

Aufenthalt 1 von \_\_\_\_\_.\_\_\_\_ (TT.MM.JJJJ) bis \_\_\_\_\_.\_\_\_\_ (TT.MM.JJJJ)

- Psychiatrisch-psychotherapeutische Behandlung
- Psychosomatisch-psychotherapeutische Behandlung
- Stationär
- Teilstationär (Tages-/Nachklinik)
- andere Abteilungen (primär körperliche Erkrankungen/Behandlungen)

Aufenthalt 2 von \_\_\_\_\_.\_\_\_\_ (TT.MM.JJJJ) bis \_\_\_\_\_.\_\_\_\_ (TT.MM.JJJJ)

- Psychiatrisch-psychotherapeutische Behandlung
- Psychosomatisch-psychotherapeutische Behandlung
- Stationär
- Teilstationär (Tages-/Nachklinik)
- andere Abteilungen (primär körperliche Erkrankungen/Behandlungen)

Aufenthalt 3 von \_\_\_\_\_.\_\_\_\_ (TT.MM.JJJJ) bis \_\_\_\_\_.\_\_\_\_ (TT.MM.JJJJ)

- Psychiatrisch-psychotherapeutische Behandlung
- Psychosomatisch-psychotherapeutische Behandlung
- Stationär
- Teilstationär (Tages-/Nachklinik)
- andere Abteilungen (primär körperliche Erkrankungen/Behandlungen)



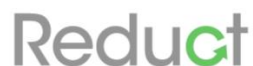

**7. Haben Sie innerhalb der letzten 3 Monate Heilmittel in Anspruch genommen (z.B. Physiotherapie, Logopädie, Ergotherapie)?**

nein

ja

Physiotherapie: Anzahl Besuche: \_\_\_\_

Logopädie: Anzahl Besuche: \_\_\_\_

Ergotherapie/Arbeitstherapie: Anzahl Besuche: \_\_\_\_

Soziotherapie: Anzahl Besuche: \_\_\_\_

Tanztherapie/Bewegungstherapie: Anzahl Besuche: \_\_\_\_

Einzel  Gruppe

Kreativtherapie: Anzahl Besuche: \_\_\_\_

Einzel  Gruppe

Kunsttherapie: Anzahl Besuche: \_\_\_\_

Einzel  Gruppe

Musiktherapie: Anzahl Besuche: \_\_\_\_

Einzel  Gruppe

Theatertherapie: Anzahl Besuche: \_\_\_\_

Einzel  Gruppe

Entspannungstechniken (autogenes Training) /progressive Muskelentspannung): Anzahl Besuche: \_\_\_\_

Einzel  Gruppe

sonstige, und zwar: \_\_\_\_\_ Anzahl Besuche: \_\_\_\_

Einzel  Gruppe

**8. Haben Sie innerhalb der letzten 3 Monate folgende Angebote in Anspruch genommen?**

**(Nicht im Rahmen eines ambulanten Arzt-/Psychotherapeutenkontaktes oder Krankenhauskontaktes)**

- Psychoonkologische Beratungsstelle:  
Anzahl Kontakte: \_\_\_ durchschnittliche Dauer pro Kontakt: \_\_\_\_\_ Minuten
- Beratungsstelle bei psychischen Problemen:  
Anzahl Kontakte: \_\_\_ durchschnittliche Dauer pro Kontakt: \_\_\_\_\_ Minuten
- Sozialpsychiatrischer Dienst/Psychosozialer Krisendienst:  
Anzahl Kontakte: \_\_\_ durchschnittliche Dauer pro Kontakt: \_\_\_\_\_ Minuten
- Tagesstätten/Kontaktstätten für Menschen mit psychischen Problemen:  
Anzahl Kontakte: \_\_\_ durchschnittliche Dauer pro Kontakt: \_\_\_\_\_ Minuten
- Selbsthilfegruppen aufgrund psychischer Probleme:  
Anzahl Kontakte: \_\_\_ durchschnittliche Dauer pro Kontakt: \_\_\_\_\_ Minuten
- weitere Angebote aufgrund psychischer Probleme (z.B. Sorgentelefon)  
und zwar: \_\_\_\_\_  
Anzahl Kontakte: \_\_\_ durchschnittliche Dauer pro Kontakt: \_\_\_\_\_ Minuten

**9. Bitte geben Sie an, ob bei Ihnen aktuell ein **Pflegegrad** vorliegt.**

- nein
- ja, seit \_\_\_\_\_
- Pflegegrad 1
  - Pflegegrad 2
  - Pflegegrad 3
  - Pflegegrad 4
  - Pflegegrad 5

10. Bitte geben Sie an, ob Sie Leistungen der Pflegekasse beziehen.

- nein
- ja
  - Pflegegeld für häusliche Pflege
  - Pflegesachleistungen für häusliche Pflege
  - kombinierte Pflegegeld und Pflegesachleistung
  - Entlastungsbetrag bei häuslicher Pflege
  - Wohnumfeld verbessernde Maßnahmen
  - Pflegesachleistungen für teilstationäre Pflege
  - Pflegesachleistungen für vollstationäre Pflege
  - zum Verbrauch bestimmte Pflegehilfsmittel

#### IV Fragen zur psychotherapeutischen/psychopharmakologischen Behandlung

1) Nehmen Sie aktuell Medikamente gegen Ängste, Depression oder Schlafstörungen ein?

- Nein
- Ja, folgende: \_\_\_\_\_  
Dosis \_\_\_\_\_  
Seit wann? \_\_\_\_\_

2) Sind Sie aktuell in psychotherapeutischer/psychiatrischer Behandlung?

- Nein
- Ja

Wie viele Sitzungen haben stattgefunden? \_\_\_\_\_ Sitzungen



Liebe Teilnehmerin, lieber Teilnehmer,

Vielen Dank, dass Sie uns mit Ihrer Teilnahme an unserer Befragung unterstützen!

In drei Monaten werden Sie einen letzten Fragebogen erhalten. Nach der Bearbeitung dieses Fragebogens ist die Studie abgeschlossen.

Sollten Sie Fragen haben, können Sie gerne jederzeit eine E-Mail an [reduct@uni-due.de](mailto:reduct@uni-due.de) senden.

Auf diesem Wege wünschen wir Ihnen weiterhin alles Gute

Ihr Reduct Team

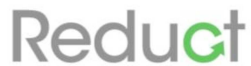

1

Teilnehmer-ID: \_\_\_\_\_

## Reduct- Web-Basierte Achtsamkeits- und Skillsbasierte Stressreduktion für Patientinnen und Patienten mit Krebs

Liebe Teilnehmerin, lieber Teilnehmer,

wir haben beobachtet, dass Sie unsere Reduct-Web-App nicht weitergenutzt haben. Wir hoffen, dass sich Ihr Gesundheitszustand nicht verschlechtert hat und nicht ausschlaggebend für den Abbruch des Trainings ist.

Wir bedanken uns bei Ihnen, dass Sie unserer Reduct-Web-App eine Chance gegeben haben und dass Sie nun einen letzten Fragebogen ausfüllen. Sie helfen uns mit Ihrer Meinung sehr und tragen zur Weiterentwicklung und Verbesserung von unserer Reduct-Web-App bei.

Für uns ist es in diesem Fragebogen in erster Linie wichtig zu erfahren, warum Sie sich entschlossen haben, das Training nicht fortzuführen. Ihre Ehrlichkeit und Offenheit wird uns sehr weiterhelfen und einen Beitrag leisten zur Verbesserung zukünftiger psychoonkologischer Versorgungsangebote.

Sollten Sie Fragen haben, können Sie gerne jederzeit eine E-Mail an [reduct@uni-due.de](mailto:reduct@uni-due.de) senden.

Wenn Sie merken, dass Sie sich sehr belastet fühlen und Sie Unterstützung bei der Bewältigung Ihrer Erkrankung benötigen, können Sie sich jederzeit an die/den Studienverantwortliche/n Ihres Zentrums wenden. Diese/r kann Ihnen bei der Suche psychoonkologischer Hilfsangebote zur Seite stehen.

Herzlichen Dank und alles Gute,

Ihr Reduct Team

*[Hier Kontaktdaten im eCRF einfügen](#)*

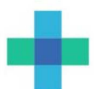



## I. Fragen zu Ihrem derzeitigen Befinden

### 1. Angst und Stresserleben

Bitte beantworten Sie im Folgenden, wie sehr die jeweilige Aussage in der letzten Woche auf Sie zutraf.

1.1. Ich fühle mich angespannt oder überreizt.

- 3 meistens
- 2 oft
- 1 von Zeit zu Zeit/ gelegentlich
- 0 überhaupt nicht

1.2. Ich fühle mich in meinen Aktivitäten gebremst.

- 3 fast immer
- 2 sehr oft
- 1 manchmal
- 0 überhaupt nicht

1.3. Ich kann mich heute noch so freuen wie früher.

- 0 ganz genau so
- 1 nicht ganz so sehr
- 2 Nur noch ein wenig
- 3 kaum oder gar nicht

1.4. Ich habe manchmal ein ängstliches Gefühl in der Magengegend.

- 0 überhaupt nicht
- 1 gelegentlich
- 2 ziemlich oft
- 3 sehr oft

1.5. Mich überkommt eine ängstliche Vorahnung, dass etwas Schreckliches passieren könnte.

- 3 ja, sehr stark
- 2 ja, aber nicht allzu stark
- 1 etwas, aber es macht mir keine Sorgen
- 0 überhaupt nicht

1.6. Ich habe das Interesse an meiner äußeren Erscheinung verloren.

- 3 ja, stimmt genau
- 2 ich kümmere mich nicht so sehr darum, wie ich sollte
- 1 möglicherweise kümmere ich mich zu wenig darum
- 0 ich kümmere mich so viel darum wie immer

1.7. Ich kann lachen und die lustige Seite der Dinge sehen.

- 0 ja, so viel wie immer
- 1 nicht mehr ganz so viel
- 2 inzwischen viel weniger
- 3 überhaupt nicht

1.8. Ich fühle mich rastlos, muss immer in Bewegung sein.

- 3 ja, tatsächlich sehr
- 2 ziemlich
- 1 nicht sehr
- 0 überhaupt nicht



# Reduct

3

1.9. Mir gehen beunruhigende Gedanken durch den Kopf.

- 3 einen Großteil der Zeit
- 2 verhältnismäßig oft
- 1 von Zeit zu Zeit, aber nicht allzu oft
- 0 nur gelegentlich/nie

1.10. Ich blicke mit Freude in die Zukunft.

- 0 ja, sehr
- 1 eher weniger als früher
- 2 viel weniger als früher
- 3 kaum bis gar nicht

1.11. Ich fühle mich glücklich.

- 3 überhaupt nicht
- 2 selten
- 1 manchmal
- 0 meistens

1.12. Mich überkommt plötzlich ein panikartiger Zustand.

- 3 ja, tatsächlich sehr oft
- 2 ziemlich oft
- 1 nicht sehr oft
- 0 überhaupt nicht

1.13. Ich kann behaglich dasitzen und mich entspannen.

- 0 ja, natürlich
- 1 gewöhnlich schon
- 2 nicht oft
- 3 überhaupt nicht

1.14. Ich kann mich an einem guten Buch, einer Radio- oder Fernsehsendung erfreuen.

- 0 oft
- 1 manchmal
- 2 Eher selten
- 3 Sehr selten

## 2. Belastungsthermometer

Bitte markieren Sie am Thermometer die Zahl, die am besten beschreibt, wie belastet Sie sich in der letzten Woche einschließlich heute gefühlt haben.

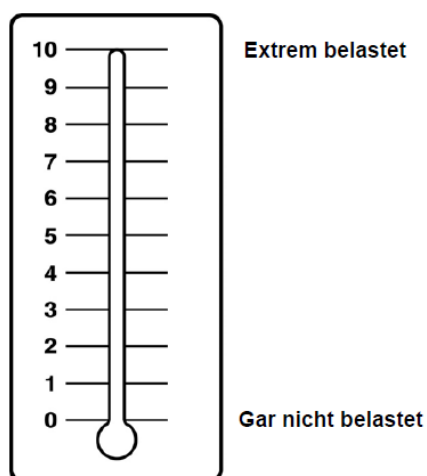

### 3. Skala zur Allgemeinen Selbstwirksamkeitserwartung

Kreuzen Sie bitte bei jeder Frage die Antwort an, die am besten auf Sie zutrifft.

- |                                                                                           |                                                                     |
|-------------------------------------------------------------------------------------------|---------------------------------------------------------------------|
| 1.1. Ich fühle mich angespannt oder überreizt.                                            | 1.2. Ich fühle mich in meinen Aktivitäten gebremst.                 |
| 3 meistens                                                                                | 3 fast immer                                                        |
| 2 oft                                                                                     | 2 sehr oft                                                          |
| 1 von Zeit zu Zeit/ gelegentlich                                                          | 1 manchmal                                                          |
| 0 überhaupt nicht                                                                         | 0 überhaupt nicht                                                   |
| 1.3. Ich kann mich heute noch so freuen wie früher.                                       | 1.4. Ich habe manchmal ein ängstliches Gefühl in der Magengegend.   |
| 0 ganz genau so                                                                           | 0 überhaupt nicht                                                   |
| 1 nicht ganz so sehr                                                                      | 1 gelegentlich                                                      |
| 2 Nur noch ein wenig                                                                      | 2 ziemlich oft                                                      |
| 3 kaum oder gar nicht                                                                     | 3 sehr oft                                                          |
| 1.5. Mich überkommt eine ängstliche Vorahnung, dass etwas Schreckliches passieren könnte. | 1.6. Ich habe das Interesse an meiner äußeren Erscheinung verloren. |
| 3 ja, sehr stark                                                                          | 3 ja, stimmt genau                                                  |
| 2 ja, aber nicht allzu stark                                                              | 2 ich kümmere mich nicht so sehr darum, wie ich sollte              |
| 1 etwas, aber es macht mir keine Sorgen                                                   | 1 möglicherweise kümmere ich mich zu wenig darum                    |
| 0 überhaupt nicht                                                                         | 0 ich kümmere mich so viel darum wie immer                          |
| 1.7. Ich kann lachen und die lustige Seite der Dinge sehen.                               | 1.8. Ich fühle mich rastlos, muss immer in Bewegung sein.           |
| 0 ja, so viel wie immer                                                                   | 3 ja, tatsächlich sehr                                              |
| 1 nicht mehr ganz so viel                                                                 | 2 ziemlich                                                          |
| 2 inzwischen viel weniger                                                                 | 1 nicht sehr                                                        |
| 3 überhaupt nicht                                                                         | 0 überhaupt nicht                                                   |

# Reduct

5

1.9. Mir gehen beunruhigende Gedanken durch den Kopf.

- 3 einen Großteil der Zeit
- 2 verhältnismäßig oft
- 1 von Zeit zu Zeit, aber nicht allzu oft
- 0 nur gelegentlich/nie

1.10. Ich blicke mit Freude in die Zukunft.

- 0 ja, sehr
- 1 eher weniger als früher
- 2 viel weniger als früher
- 3 kaum bis gar nicht

1.11. Ich fühle mich glücklich.

- 3 überhaupt nicht
- 2 selten
- 1 manchmal
- 0 meistens

1.12. Mich überkommt plötzlich ein panikartiger Zustand.

- 3 ja, tatsächlich sehr oft
- 2 ziemlich oft
- 1 nicht sehr oft
- 0 überhaupt nicht

1.13. Ich kann behaglich dasitzen und mich entspannen.

- 0 ja, natürlich
- 1 gewöhnlich schon
- 2 nicht oft
- 3 überhaupt nicht

1.14. Ich kann mich an einem guten Buch, einer Radio- oder Fernsehsendung erfreuen.

- 0 oft
- 1 manchmal
- 2 Eher selten
- 3 Sehr selten

**4. Lebensqualität (EORT-QLQ-C30)**

Bitte kreuzen Sie im Folgenden Abschnitt die Zahl von 1 bis 4 an, die am besten auf Sie zutrifft.

|                                                                                                                                      | Überhaupt<br>nicht | Wenig | Mäßig | Sehr |
|--------------------------------------------------------------------------------------------------------------------------------------|--------------------|-------|-------|------|
| 4.1. Bereitet es Ihnen Schwierigkeiten, sich körperlich anzustrengen (z.B. eine schwere Einkaufstasche oder einen Koffer zu tragen)? | 1                  | 2     | 3     | 4    |
| 4.2. Bereitet es Ihnen Schwierigkeiten, einen <u>längeren</u> Spaziergang zu machen?                                                 | 1                  | 2     | 3     | 4    |
| 4.3. Bereitet es Ihnen Schwierigkeiten, eine <u>kurze</u> Strecke außer Haus zu gehen?                                               | 1                  | 2     | 3     | 4    |
| 4.4. Müssen Sie tagsüber im Bett liegen oder in einem Sessel sitzen?                                                                 | 1                  | 2     | 3     | 4    |
| 4.5. Brauchen Sie Hilfe beim Essen, Anziehen, Waschen oder Benutzen der Toilette?                                                    | 1                  | 2     | 3     | 4    |
| <b>Während der letzten Woche:</b>                                                                                                    |                    |       |       |      |
|                                                                                                                                      | Überhaupt<br>nicht | Wenig | Mäßig | Sehr |
| 4.6. Waren Sie bei Ihrer Arbeit oder bei anderen tagtäglichen Beschäftigungen eingeschränkt?                                         | 1                  | 2     | 3     | 4    |
| 4.7. Waren Sie bei Ihren Hobbys oder andere Freizeitbeschäftigungen eingeschränkt?                                                   | 1                  | 2     | 3     | 4    |
| 4.8. Waren Sie kurzatmig?                                                                                                            | 1                  | 2     | 3     | 4    |
| 4.9. Hatten Sie Schmerzen?                                                                                                           | 1                  | 2     | 3     | 4    |
| 4.10. Mussten Sie sich ausruhen?                                                                                                     | 1                  | 2     | 3     | 4    |
| 4.11. Hatten Sie Schlafstörungen?                                                                                                    | 1                  | 2     | 3     | 4    |

# Reduct

7

4.12. Fühlten Sie sich schwach?

|   |   |   |   |
|---|---|---|---|
| 1 | 2 | 3 | 4 |
|---|---|---|---|

**Während der letzten Woche:****Überhaupt  
nicht****Wenig****Mäßig****Sehr**

4.13. Hatten Sie Appetitmangel?

|   |   |   |   |
|---|---|---|---|
| 1 | 2 | 3 | 4 |
|---|---|---|---|

4.14. War Ihnen übel?

|   |   |   |   |
|---|---|---|---|
| 1 | 2 | 3 | 4 |
|---|---|---|---|

4.15. Haben Sie erbrochen?

|   |   |   |   |
|---|---|---|---|
| 1 | 2 | 3 | 4 |
|---|---|---|---|

4.16. Hatten Sie Verstopfung?

|   |   |   |   |
|---|---|---|---|
| 1 | 2 | 3 | 4 |
|---|---|---|---|

4.17. Hatten Sie Durchfall?

|   |   |   |   |
|---|---|---|---|
| 1 | 2 | 3 | 4 |
|---|---|---|---|

4.18. Waren Sie müde?

|   |   |   |   |
|---|---|---|---|
| 1 | 2 | 3 | 4 |
|---|---|---|---|

4.19. Fühlten Sie sich durch Schmerzen in Ihrem alltäglichen Leben beeinträchtigt?

|   |   |   |   |
|---|---|---|---|
| 1 | 2 | 3 | 4 |
|---|---|---|---|

4.20. Hatten Sie Schwierigkeiten, sich auf etwas zu konzentrieren, z.B. auf das Zeitungslesen oder das Fernsehen?

|   |   |   |   |
|---|---|---|---|
| 1 | 2 | 3 | 4 |
|---|---|---|---|

4.21. Fühlten Sie sich angespannt?

|   |   |   |   |
|---|---|---|---|
| 1 | 2 | 3 | 4 |
|---|---|---|---|

4.22. Haben Sie sich Sorgen gemacht?

|   |   |   |   |
|---|---|---|---|
| 1 | 2 | 3 | 4 |
|---|---|---|---|

4.23. Waren Sie reizbar?

|   |   |   |   |
|---|---|---|---|
| 1 | 2 | 3 | 4 |
|---|---|---|---|

4.24. Fühlten Sie sich niedergeschlagen?

|   |   |   |   |
|---|---|---|---|
| 1 | 2 | 3 | 4 |
|---|---|---|---|

4.25. Hatten Sie Schwierigkeiten, sich an Dinge zu erinnern?

|   |   |   |   |
|---|---|---|---|
| 1 | 2 | 3 | 4 |
|---|---|---|---|

4.26. Hat Ihr körperlicher Zustand oder Ihre medizinische Behandlung Ihr Familienleben beeinträchtigt?

|   |   |   |   |
|---|---|---|---|
| 1 | 2 | 3 | 4 |
|---|---|---|---|

# Reduct

8

4.27. Hat Ihr körperlicher Zustand oder Ihre medizinische Behandlung Ihr Zusammensein oder Ihre gemeinsamen Unternehmungen mit anderen Menschen beeinträchtigt?

1                      2                      3                      4

4.28. Hat Ihr körperlicher Zustand oder Ihre medizinische Behandlung für Sie finanzielle Schwierigkeiten mit sich gebracht?

1                      2                      3                      4

**Bitte kreuzen Sie bei den folgenden Fragen die Zahl zwischen 1 und 7 an, die am besten auf Sie zutrifft.**

4.29. Wie würden Sie insgesamt Ihren Gesundheitszustand während der letzten Woche einschätzen?

1                      2                      3                      4                      5                      6                      7

sehr  
schlecht

ausgezeichnet

4.30. Wie würden Sie insgesamt Ihre Lebensqualität während der letzten Woche einschätzen?

1                      2                      3                      4                      5                      6                      7

sehr  
schlecht

ausgezeichnet

**5. Lebensqualität (EQ-5D-5L)**

Bitte kreuzen Sie unter jeder Überschrift das Kästchen an, das Ihren Gesundheitszustand heute am besten beschreibt.

**5.1. Beweglichkeit/Mobilität**

|                                         |   |
|-----------------------------------------|---|
| Ich habe keine Probleme herumzugehen    | 1 |
| Ich habe leichte Probleme herumzugehen  | 2 |
| Ich habe mäßige Probleme herumzugehen   | 3 |
| Ich habe große Probleme herumzugehen    | 4 |
| Ich bin nicht in der Lage, herumzugehen | 5 |

**5.2. Für sich selbst sorgen**

|                                                                   |   |
|-------------------------------------------------------------------|---|
| Ich habe keine Probleme, mich selbst zu waschen oder anzuziehen   | 1 |
| Ich habe leichte Probleme, mich selbst zu waschen oder anzuziehen | 2 |
| Ich habe mäßige Probleme, mich selbst zu waschen oder anzuziehen  | 3 |
| Ich habe große Probleme, mich selbst zu waschen oder anzuziehen   | 4 |
| Ich bin nicht in der Lage, mich selbst zu waschen oder anzuziehen | 5 |

**5.3. Alltägliche Tätigkeiten** (z.B. Arbeit, Studium, Hausarbeit, Familien- oder Freizeitaktivitäten)

|                                                                        |   |
|------------------------------------------------------------------------|---|
| Ich habe keine Probleme, meinen alltäglichen Tätigkeiten nachzugehen   | 1 |
| Ich habe leichte Probleme, meinen alltäglichen Tätigkeiten nachzugehen | 2 |
| Ich habe mäßige Probleme, meinen alltäglichen Tätigkeiten nachzugehen  | 3 |
| Ich habe große Probleme, meinen alltäglichen Tätigkeiten nachzugehen   | 4 |
| Ich bin nicht in der Lage, meinen alltäglichen Tätigkeiten nachzugehen | 5 |

# Reduct

10

## 5.4. Schmerzen/Körperliche Beschwerden

|                                             |   |
|---------------------------------------------|---|
| Ich habe keine Schmerzen oder Beschwerden   | 1 |
| Ich habe leichte Schmerzen oder Beschwerden | 2 |
| Ich habe mäßige Schmerzen oder Beschwerden  | 3 |
| Ich habe starke Schmerzen oder Beschwerden  | 4 |
| Ich habe extreme Schmerzen oder Beschwerden | 5 |

## 5.5. Angst/Niedergeschlagenheit

|                                             |   |
|---------------------------------------------|---|
| Ich bin nicht ängstlich oder deprimiert     | 1 |
| Ich bin ein wenig ängstlich oder deprimiert | 2 |
| Ich bin mäßig ängstlich oder deprimiert     | 3 |
| Ich bin sehr ängstlich oder deprimiert      | 4 |
| Ich bin extrem ängstlich oder deprimiert    | 5 |



# Reduct

5.6. Um Sie bei der Einschätzung, wie gut oder wie schlecht Ihr Gesundheitszustand ist, zu unterstützen, haben wir eine Skala gezeichnet, ähnlich einem Thermometer. Der best denkbare Gesundheitszustand ist mit einer "100" gekennzeichnet, der schlechteste mit "0".

Wir möchten Sie nun bitten, auf dieser Skala zu kennzeichnen, wie gut oder schlecht Ihrer Ansicht nach Ihr persönlicher Gesundheitszustand heute ist. Bitte verbinden Sie dazu den untenstehenden Kasten mit dem Punkt auf der Skala, der Ihren heutigen Gesundheitszustand am besten wiedergibt.

**Ihr heutiger  
Gesundheitszustand**

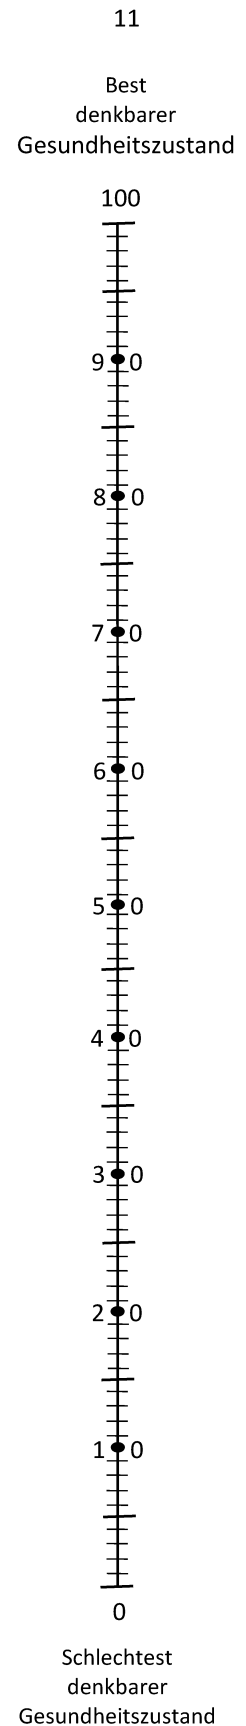

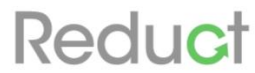

## 6. Achtsamkeit (FFA)

**Dieser Fragebogen soll Ihre Achtsamkeit erfassen. Bitte beziehen Sie dabei die Aussagen auf die letzten 14 Tage. Kreuzen Sie bitte bei jeder Frage die Antwort an, die am besten auf Sie zutrifft.**

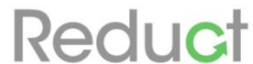

**7. Wie oft fühlten Sie sich im Verlauf der letzten 2 Wochen durch die folgenden Beschwerden beeinträchtigt? (PHQ-4)**

|                                                                                                             | <b>Fast nie</b> | <b>Eher selten</b> | <b>Relativ oft</b> | <b>Fast immer</b> |
|-------------------------------------------------------------------------------------------------------------|-----------------|--------------------|--------------------|-------------------|
| 6.1. Ich bin offen für die Erfahrung des Augenblicks.                                                       | 1               | 2                  | 3                  | 4                 |
| 6.2. Ich spüre in meinen Körper hinein, sei es beim Essen, Kochen, Putzen, Reden.                           | 1               | 2                  | 3                  | 4                 |
| 6.3. Wenn ich merke, dass ich abwesend war, kehre ich sanft zur Erfahrung des Augenblicks zurück.           | 1               | 2                  | 3                  | 4                 |
| 6.4. Ich kann mich selbst wertschätzen.                                                                     | 1               | 2                  | 3                  | 4                 |
| 6.5. Ich achte auf die Motive meiner Handlungen.                                                            | 1               | 2                  | 3                  | 4                 |
| 6.6. Ich sehe meine Fehler und Schwierigkeiten, ohne mich zu verurteilen.                                   | 1               | 2                  | 3                  | 4                 |
| 6.7. Ich bin in Kontakt mit meinen Erfahrungen, hier und jetzt.                                             | 1               | 2                  | 3                  | 4                 |
| 6.8. Ich nehme unangenehme Erfahrungen an.                                                                  | 1               | 2                  | 3                  | 4                 |
| 6.9. Ich bin mir selbst gegenüber freundlich, wenn Dinge schief laufen.                                     | 1               | 2                  | 3                  | 4                 |
| 6.10. Ich beobachte meine Gefühle, ohne mich in ihnen zu verlieren.                                         | 1               | 2                  | 3                  | 4                 |
| 6.11. In schwierigen Situationen kann ich innehalten.                                                       | 1               | 2                  | 3                  | 4                 |
| 6.12. Ich erlebe Momente innerer Ruhe und Gelassenheit, selbst wenn äußerlich Schmerzen und Unruhe da sind. | 1               | 2                  | 3                  | 4                 |
| 6.13. Ich bin ungeduldig mit mir und meinen Mitmenschen.                                                    | 4               | 3                  | 2                  | 1                 |
| 6.14. Ich kann darüber lächeln, wenn ich sehe, wie ich mir manchmal das Leben schwer mache.                 | 1               | 2                  | 3                  | 4                 |

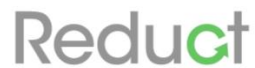

14

|                                                                      | <b>Überhaupt nicht</b> | <b>An einzelnen Tagen</b> | <b>An mehr als der Hälfte der Tage</b> | <b>Beinahe jeden Tag</b> |
|----------------------------------------------------------------------|------------------------|---------------------------|----------------------------------------|--------------------------|
| 7.1. Wenig Interesse oder Freude an Ihren Tätigkeiten                | 0                      | 1                         | 2                                      | 3                        |
| 7.2. Niedergeschlagenheit, Schwermut oder Hoffnungslosigkeit         | 0                      | 1                         | 2                                      | 3                        |
| 7.3. Nervosität, Ängstlichkeit oder Anspannung                       | 0                      | 1                         | 2                                      | 3                        |
| 7.4. Nicht in der Lage sein, Sorgen zu stoppen oder zu kontrollieren | 0                      | 1                         | 2                                      | 3                        |

## 8. Skills

Kreuzen Sie bitte bei jeder Frage die Antwort an, die am besten auf Sie zutrifft.



## II. Fragen zur Reduct-Web-App

### 1. Bitte geben Sie an, aus welchem Grund Sie die Nutzung der Reduct-Web-App nicht fortgeführt haben. Hiermit helfen Sie dabei, unsere Web-App zu verbessern und weiter zu entwickeln.

|                                                                                                               | Stimmt<br>überhaupt<br>nicht |   | Neutral |   | Stimmt<br>voll-<br>kommen |
|---------------------------------------------------------------------------------------------------------------|------------------------------|---|---------|---|---------------------------|
| 8.1. In belastenden Situationen kann ich mich aufmuntern, indem ich meine Gedanken auf positive Dinge richte. | 1                            | 2 | 3       | 4 | 5                         |
| 8.2. Meine Gedanken geben mir im Umgang mit stressigen Situationen Kraft.                                     | 1                            | 2 | 3       | 4 | 5                         |
| 8.3. Wenn ich belastende Gefühle verspüre, lasse ich sie zu.                                                  | 1                            | 2 | 3       | 4 | 5                         |
| 8.4. Ich kann Dinge annehmen, die ich nicht ändern kann.                                                      | 1                            | 2 | 3       | 4 | 5                         |
| 8.5. Ich überlege mir, was ich im Umgang mit der Krebserkrankung tun kann.                                    | 1                            | 2 | 3       | 4 | 5                         |
| 8.6. Ich führe oft bestimmte Aktivitäten aus, um auf andere Gedanken zu kommen.                               | 1                            | 2 | 3       | 4 | 5                         |
| 8.7. Ich kann mir wohlwollend begegnen.                                                                       | 1                            | 2 | 3       | 4 | 5                         |
| 8.8. Ich kann gut für mich sorgen.                                                                            | 1                            | 2 | 3       | 4 | 5                         |
| 8.9. Ich suche Kontakt zu liebevollen Menschen.                                                               | 1                            | 2 | 3       | 4 | 5                         |
| 8.10. Ich kann nach Unterstützung suchen.                                                                     | 1                            | 2 | 3       | 4 | 5                         |

# Reduct

16

- Verschlechterung meines psychischen Zustandes
- Verschlechterung meines körperlichen Zustandes
- Ich habe das Training nicht als hilfreich erlebt
- Technische Probleme
- Zeitmangel
- Fehlendes Interesse
- Fehlende Motivation
- Anderer Grund: \_\_\_\_\_

## 2. Patientenzufriedenheit (CSQ-1 adapted to Internet-based interventions)

Nun folgen Fragen dazu, wie zufrieden Sie mit dem Training/ der Reduct-Web-App waren.

|                                                                                                                                  | Trifft<br>nicht zu       | Trifft<br>eher<br>nicht zu | Trifft<br>teilweise<br>zu | Trifft voll<br>und ganz<br>zu |
|----------------------------------------------------------------------------------------------------------------------------------|--------------------------|----------------------------|---------------------------|-------------------------------|
| 2.1. Das Training, an dem ich teilgenommen habe, hatte eine hohe Qualität                                                        | <input type="checkbox"/> | <input type="checkbox"/>   | <input type="checkbox"/>  | <input type="checkbox"/>      |
|                                                                                                                                  | 1                        | 2                          | 3                         | 4                             |
| 2.2. Ich habe die Art von Training erhalten, die ich wollte.                                                                     | <input type="checkbox"/> | <input type="checkbox"/>   | <input type="checkbox"/>  | <input type="checkbox"/>      |
|                                                                                                                                  | 1                        | 2                          | 3                         | 4                             |
| 2.3. Das Training hat meinen Bedürfnissen entsprochen.                                                                           | <input type="checkbox"/> | <input type="checkbox"/>   | <input type="checkbox"/>  | <input type="checkbox"/>      |
|                                                                                                                                  | 1                        | 2                          | 3                         | 4                             |
| 2.4. Ich würde einem Freund oder einer Freundin dieses Training empfehlen, wenn er oder sie eine ähnliche Hilfe benötigen würde. | <input type="checkbox"/> | <input type="checkbox"/>   | <input type="checkbox"/>  | <input type="checkbox"/>      |
|                                                                                                                                  | 1                        | 2                          | 3                         | 4                             |
| 2.5. Ich bin zufrieden mit dem Ausmaß der Hilfe, die ich durch das Training erhalten habe.                                       | <input type="checkbox"/> | <input type="checkbox"/>   | <input type="checkbox"/>  | <input type="checkbox"/>      |
|                                                                                                                                  | 1                        | 2                          | 3                         | 4                             |

2.6. Das Training hat mir dabei geholfen, angemessener mit meinen Problemen umzugehen.

|                          |                          |                          |                          |
|--------------------------|--------------------------|--------------------------|--------------------------|
| <input type="checkbox"/> | <input type="checkbox"/> | <input type="checkbox"/> | <input type="checkbox"/> |
| 1                        | 2                        | 3                        | 4                        |

2.7. Im Großen und Ganzen bin ich mit dem Training zufrieden.

|                          |                          |                          |                          |
|--------------------------|--------------------------|--------------------------|--------------------------|
| <input type="checkbox"/> | <input type="checkbox"/> | <input type="checkbox"/> | <input type="checkbox"/> |
| 1                        | 2                        | 3                        | 4                        |

2.8. Ich würde ein solches Training wieder nutzen, wenn ich Hilfe bräuchte.

|                          |                          |                          |                          |
|--------------------------|--------------------------|--------------------------|--------------------------|
| <input type="checkbox"/> | <input type="checkbox"/> | <input type="checkbox"/> | <input type="checkbox"/> |
| 1                        | 2                        | 3                        | 4                        |

### 3. Nutzbarkeit des Trainings (SUS)

3.1. Ich denke, dass ich das Programm (Reduct-Web-App) häufig benutzen würde.

| Stimme<br>überhaupt nicht zu | 1                        | 2                        | 3                        | 4                        | Stimme<br>voll zu        |
|------------------------------|--------------------------|--------------------------|--------------------------|--------------------------|--------------------------|
| <input type="checkbox"/>     | <input type="checkbox"/> | <input type="checkbox"/> | <input type="checkbox"/> | <input type="checkbox"/> | <input type="checkbox"/> |

3.2. Ich fand das Programm (Reduct-Web-App) unnötig komplex.

| Stimme<br>überhaupt nicht zu | 1                        | 2                        | 3                        | 4                        | Stimme<br>voll zu        |
|------------------------------|--------------------------|--------------------------|--------------------------|--------------------------|--------------------------|
| <input type="checkbox"/>     | <input type="checkbox"/> | <input type="checkbox"/> | <input type="checkbox"/> | <input type="checkbox"/> | <input type="checkbox"/> |

3.3. Ich fand das Programm (Reduct-Web-App) war einfach zu benutzen.

| Stimme<br>überhaupt nicht zu | 1                        | 2                        | 3                        | 4                        | Stimme<br>voll zu        |
|------------------------------|--------------------------|--------------------------|--------------------------|--------------------------|--------------------------|
| <input type="checkbox"/>     | <input type="checkbox"/> | <input type="checkbox"/> | <input type="checkbox"/> | <input type="checkbox"/> | <input type="checkbox"/> |

3.4. Ich denke, ich hätte die Hilfe einer technisch versierten Person benötigt, um das Programm (Reduct-Web-App) besser nutzen zu können.

| Stimme<br>überhaupt nicht zu | 1                        | 2                        | 3                        | 4                        | Stimme<br>voll zu        |
|------------------------------|--------------------------|--------------------------|--------------------------|--------------------------|--------------------------|
| <input type="checkbox"/>     | <input type="checkbox"/> | <input type="checkbox"/> | <input type="checkbox"/> | <input type="checkbox"/> | <input type="checkbox"/> |

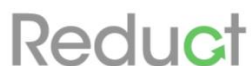

3.5. Ich fand, die verschiedenen Funktionen in diesem Programm (Reduct-Web-App) griffen gut ineinander.

| Stimme<br>überhaupt nicht zu |                          |                          |                          |                          | Stimme<br>voll zu        |
|------------------------------|--------------------------|--------------------------|--------------------------|--------------------------|--------------------------|
| 1                            | 2                        | 3                        | 4                        | 5                        |                          |
| <input type="checkbox"/>     | <input type="checkbox"/> | <input type="checkbox"/> | <input type="checkbox"/> | <input type="checkbox"/> | <input type="checkbox"/> |

3.6. Ich denke, das Programm (Reduct-Web-App) enthielt zu viele Inkonsistenzen (Unstimmigkeiten).

| Stimme<br>überhaupt nicht zu |                          |                          |                          |                          | Stimme<br>voll zu        |
|------------------------------|--------------------------|--------------------------|--------------------------|--------------------------|--------------------------|
| 1                            | 2                        | 3                        | 4                        | 5                        |                          |
| <input type="checkbox"/>     | <input type="checkbox"/> | <input type="checkbox"/> | <input type="checkbox"/> | <input type="checkbox"/> | <input type="checkbox"/> |

3.7. Ich kann mir vorstellen, dass die meisten Menschen den Umgang mit diesem Programm (Reduct-Web-App) sehr schnell lernen können.

| Stimme<br>überhaupt nicht zu |                          |                          |                          |                          | Stimme<br>voll zu        |
|------------------------------|--------------------------|--------------------------|--------------------------|--------------------------|--------------------------|
| 1                            | 2                        | 3                        | 4                        | 5                        |                          |
| <input type="checkbox"/>     | <input type="checkbox"/> | <input type="checkbox"/> | <input type="checkbox"/> | <input type="checkbox"/> | <input type="checkbox"/> |

3.8. Ich fand das Programm (Reduct-Web-App) sehr umständlich zu benutzen.

| Stimme<br>überhaupt nicht zu |                          |                          |                          |                          | Stimme<br>voll zu        |
|------------------------------|--------------------------|--------------------------|--------------------------|--------------------------|--------------------------|
| 1                            | 2                        | 3                        | 4                        | 5                        |                          |
| <input type="checkbox"/>     | <input type="checkbox"/> | <input type="checkbox"/> | <input type="checkbox"/> | <input type="checkbox"/> | <input type="checkbox"/> |

3.9. Ich fühlte mich in der Benutzung des Programms (Reduct-Web-App) sehr sicher.

| Stimme<br>überhaupt nicht zu |                          |                          |                          |                          | Stimme<br>voll zu        |
|------------------------------|--------------------------|--------------------------|--------------------------|--------------------------|--------------------------|
| 1                            | 2                        | 3                        | 4                        | 5                        |                          |
| <input type="checkbox"/>     | <input type="checkbox"/> | <input type="checkbox"/> | <input type="checkbox"/> | <input type="checkbox"/> | <input type="checkbox"/> |

3.10. Ich musste eine Menge lernen, ehe ich anfangen konnte, das Programm (Reduct-Web-App) zu verwenden.

| Stimme<br>überhaupt nicht zu |                          |                          |                          |                          | Stimme<br>voll zu        |
|------------------------------|--------------------------|--------------------------|--------------------------|--------------------------|--------------------------|
| 1                            | 2                        | 3                        | 4                        | 5                        |                          |
| <input type="checkbox"/>     | <input type="checkbox"/> | <input type="checkbox"/> | <input type="checkbox"/> | <input type="checkbox"/> | <input type="checkbox"/> |



#### 4. Bewertung von Gesundheitsanwendungen für das Smartphone (Survey for Rating Healthcare Smartphone Applications)

|                                                                                                                     | Gar nicht<br>zutreffend | Ein wenig<br>zutreffen | Großenteils<br>zutreffend | Immer<br>zutreffen |
|---------------------------------------------------------------------------------------------------------------------|-------------------------|------------------------|---------------------------|--------------------|
| 4.1. Die in der Reduct-Web-App bereitgestellten Informationen sind korrekt (es gibt keine ungenauen Informationen). | 1                       | 2                      | 3                         | 4                  |
| 4.2. In der Reduct-Web-App werden klare Informationen bereitgestellt.                                               | 1                       | 2                      | 3                         | 4                  |
| 4.3. Die Gesundheitsinformationen in dem Programm sind leicht verständlich.                                         | 1                       | 2                      | 3                         | 4                  |
| 4.4. Die in der Reduct-Web-App bereitgestellten Gesundheitsinformationen werden in Alltagssprache erklärt.          | 1                       | 2                      | 3                         | 4                  |
| 4.5. Die in der Reduct-Web-App bereitgestellten Informationen sind für Nutzer im Allgemeinen leicht zu lesen.       | 1                       | 2                      | 3                         | 4                  |
| 4.6. Es werden professionelle Gesundheitsinformationen zur Verfügung gestellt.                                      | 1                       | 2                      | 3                         | 4                  |
| 4.7. Gesundheitsinformationen werden systematisch vermittelt.                                                       | 1                       | 2                      | 3                         | 4                  |
| 4.8. Es ist ersichtlich, dass die Gesundheitsinformationen aus verlässlichen Quellen zitiert werden                 | 1                       | 2                      | 3                         | 4                  |
| 4.9. Die bereitgestellten Gesundheitsinformationen stammen von medizinischen Experten.                              | 1                       | 2                      | 3                         | 4                  |
| 4.10. Das Programm ist kohärent/einheitlich in Bezug auf Farbe, Konfiguration und Ausdrucksweise.                   | 1                       | 2                      | 3                         | 4                  |

# Reduct

20

|                                                                                                    |   |   |   |   |
|----------------------------------------------------------------------------------------------------|---|---|---|---|
| 4.11. Die Anordnung der Symbole steht im Einklang mit dem gesamten Design des Programms.           | 1 | 2 | 3 | 4 |
| 4.12. Icons/Symbole werden in dem Programm einheitlich kategorisiert.                              | 1 | 2 | 3 | 4 |
| 4.13. Die Inhalte sind gut organisiert, so dass sie zugänglich und logisch verständlich sind.      | 1 | 2 | 3 | 4 |
| 4.14. Die Bedeutung der einzelnen Icons/Symbole wird deutlich zum Ausdruck gebracht.               | 1 | 2 | 3 | 4 |
| 4.15. Die Reduct-Web-App hat eine gut lesbare Schrift/Schriftart.                                  | 1 | 2 | 3 | 4 |
| 4.16. Visuelle Elemente verwirren den Nutzer nicht.                                                | 1 | 2 | 3 | 4 |
| 4.17. Die Struktur der Reduct-Web-App ist klar ersichtlich.                                        | 1 | 2 | 3 | 4 |
| 4.18. Anweisungen werden kurz und bündig formuliert.                                               | 1 | 2 | 3 | 4 |
| 4.19. Anweisungen werden präzise erteilt.                                                          | 1 | 2 | 3 | 4 |
| 4.20. Alle Wörter/ Sätze sind nicht nur korrekt geschrieben, sondern auch grammatikalisch korrekt. | 1 | 2 | 3 | 4 |

# Reduct

21

4.21. Die Reduct-Web-App liefert Informationen zum Thema Datenschutz.

1                      2                      3                      4

4.22. Die Reduct-Web-App liefert Informationen über Sicherheitsrichtlinien in Bezug auf persönliche Gesundheitsinformationen.

1                      2                      3                      4

4.23. Die Reduct-Web-App erklärte das Sicherheitssystem zur Schaffung einer sicheren Umgebung für eine bessere Nutzung der mobilen App.

1                      2                      3                      4

## 5. Allgemeine Fragen

### 5.1. Fanden Sie die visuelle Darstellung der Module in der Reduct-Web-App ansprechend?

|                                   |                             |                          |                          |                          |
|-----------------------------------|-----------------------------|--------------------------|--------------------------|--------------------------|
| <input type="checkbox"/>          | <input type="checkbox"/>    | <input type="checkbox"/> | <input type="checkbox"/> | <input type="checkbox"/> |
| 1                                 | 2                           | 3                        | 4                        | 5                        |
| überhaupt<br>nicht<br>ansprechend | eher weniger<br>ansprechend | mäßig<br>ansprechend     | eher<br>ansprechend      | sehr<br>ansprechend      |

### 5.2. Waren die Texte klar und verständlich?

|                           |                            |                          |                          |                          |
|---------------------------|----------------------------|--------------------------|--------------------------|--------------------------|
| <input type="checkbox"/>  | <input type="checkbox"/>   | <input type="checkbox"/> | <input type="checkbox"/> | <input type="checkbox"/> |
| 1                         | 2                          | 3                        | 4                        | 5                        |
| gar nicht<br>verständlich | eher nicht<br>verständlich | mäßig<br>verständlich    | eher verständlich        | sehr verständlich        |



22

**5.3. Fanden Sie die Videos ansprechend?**

|                           |                          |                          |                          |                          |                           |
|---------------------------|--------------------------|--------------------------|--------------------------|--------------------------|---------------------------|
| <input type="checkbox"/>  | <input type="checkbox"/> | <input type="checkbox"/> | <input type="checkbox"/> | <input type="checkbox"/> | <input type="checkbox"/>  |
| 1                         | 2                        | 3                        | 4                        | 5                        | 6                         |
| überhaupt nicht hilfreich | kaum hilfreich           | mäßig hilfreich          | eher hilfreich           | sehr hilfreich           | Kann ich nicht beurteilen |

**5.4. Fanden Sie die Audio-Dateien ansprechend?**

|                             |                          |                          |                          |                          |                           |
|-----------------------------|--------------------------|--------------------------|--------------------------|--------------------------|---------------------------|
| <input type="checkbox"/>    | <input type="checkbox"/> | <input type="checkbox"/> | <input type="checkbox"/> | <input type="checkbox"/> | <input type="checkbox"/>  |
| 1                           | 2                        | 3                        | 4                        | 5                        | 6                         |
| überhaupt nicht ansprechend | eher weniger ansprechend | mäßig ansprechend        | eher ansprechend         | sehr ansprechend         | Kann ich nicht beurteilen |

**5.5. Fanden Sie die Belohnungen ansprechend?**

|                             |                          |                          |                          |                          |                           |
|-----------------------------|--------------------------|--------------------------|--------------------------|--------------------------|---------------------------|
| <input type="checkbox"/>    | <input type="checkbox"/> | <input type="checkbox"/> | <input type="checkbox"/> | <input type="checkbox"/> | <input type="checkbox"/>  |
| 1                           | 2                        | 3                        | 4                        | 5                        | 6                         |
| überhaupt nicht ansprechend | eher weniger ansprechend | mäßig ansprechend        | eher ansprechend         | sehr ansprechend         | Kann ich nicht beurteilen |

**5.6. Fanden Sie die Übungen hilfreich?**

|                           |                          |                          |                          |                          |                           |
|---------------------------|--------------------------|--------------------------|--------------------------|--------------------------|---------------------------|
| <input type="checkbox"/>  | <input type="checkbox"/> | <input type="checkbox"/> | <input type="checkbox"/> | <input type="checkbox"/> | <input type="checkbox"/>  |
| 1                         | 2                        | 3                        | 4                        | 5                        | 6                         |
| überhaupt nicht hilfreich | kaum hilfreich           | mäßig hilfreich          | eher hilfreich           | sehr hilfreich           | Kann ich nicht beurteilen |

**5.7. Sind Sie mit der Plattform „Reduct-Web-App“ zufrieden?**

|                           |                          |                          |                          |                          |
|---------------------------|--------------------------|--------------------------|--------------------------|--------------------------|
| <input type="checkbox"/>  | <input type="checkbox"/> | <input type="checkbox"/> | <input type="checkbox"/> | <input type="checkbox"/> |
| 1                         | 2                        | 3                        | 4                        | 5                        |
| überhaupt nicht zufrieden | Kaum zufrieden           | mäßig zufrieden          | Eher zufrieden           | Sehr zufrieden           |

**5.8. Hat die Plattform dir Sicherheit im Umgang mit deinen persönlichen Daten vermittelt?**

|                               |                            |                          |                          |                          |
|-------------------------------|----------------------------|--------------------------|--------------------------|--------------------------|
| <input type="checkbox"/>      | <input type="checkbox"/>   | <input type="checkbox"/> | <input type="checkbox"/> | <input type="checkbox"/> |
| 1                             | 2                          | 3                        | 4                        | 5                        |
| überhaupt nicht<br>zutreffend | eher weniger<br>zutreffend | mäßig zutreffend         | eher zutreffend          | sehr zutreffend          |

**5.9. Würden Sie die Reduct-Web-App an andere Betroffene weiterempfehlen?**

ja  nein

**5.10. Würden Sie die Reduct-Web-App zukünftig nutzen?**

ja  nein

**5.11. Inwiefern denken Sie, dass Sie persönlich von unserer Reduct-Web-App profitiert haben?**

|                          |                          |                          |                          |                          |
|--------------------------|--------------------------|--------------------------|--------------------------|--------------------------|
| <input type="checkbox"/> |
| 1                        | 2                        | 3                        | 4                        | 5                        |
| überhaupt nicht          | kaum                     | mäßig                    | eher                     | Sehr                     |

**5.12. Wurden Sie durch die Plattform „Reduct-Web-App“ motiviert, dass Training weiterzuführen?**

|                              |                           |                          |                          |                          |
|------------------------------|---------------------------|--------------------------|--------------------------|--------------------------|
| <input type="checkbox"/>     | <input type="checkbox"/>  | <input type="checkbox"/> | <input type="checkbox"/> | <input type="checkbox"/> |
| 1                            | 2                         | 3                        | 4                        | 5                        |
| Trifft überhaupt<br>nicht zu | Trifft eher<br>weniger zu | Trifft mäßig zu          | Trifft eher zu           | Trifft vollkommen<br>zu  |

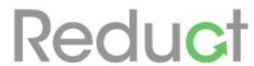**5.13. Konnten Sie die Nutzung der Reduct-Web-App gut in Ihren Alltag einbauen?**

|                          |                          |                          |                          |                          |
|--------------------------|--------------------------|--------------------------|--------------------------|--------------------------|
| <input type="checkbox"/> |
| überhaupt nicht gut      | Weniger gut              | mäßig                    | Eher gut                 | Sehr gut                 |

**5.14. Konnten Sie sich gut auf die Inhalte konzentrieren, wenn Sie das Training genutzt haben?**

|                           |                          |                          |                          |                          |
|---------------------------|--------------------------|--------------------------|--------------------------|--------------------------|
| <input type="checkbox"/>  | <input type="checkbox"/> | <input type="checkbox"/> | <input type="checkbox"/> | <input type="checkbox"/> |
| Trifft überhaupt nicht zu | Trifft eher weniger zu   | Trifft teilweise zu      | Trifft eher zu           | Trifft vollkommen zu     |

**5.15. Hat Ihnen die Reduct-Web-App dabei geholfen mit krankheitsbezogenen Belastungen besser umzugehen?**

|                           |                          |                          |                          |                          |
|---------------------------|--------------------------|--------------------------|--------------------------|--------------------------|
| <input type="checkbox"/>  | <input type="checkbox"/> | <input type="checkbox"/> | <input type="checkbox"/> | <input type="checkbox"/> |
| 1                         | 2                        | 3                        | 4                        | 5                        |
| Trifft überhaupt nicht zu | Trifft eher weniger zu   | Trifft teilweise zu      | Trifft eher zu           | Trifft vollkommen zu     |



### III. Fragen zur Beschäftigung mit Achtsamkeit und der Reduct-Web-App

**1) Bitte geben Sie an, wie häufig Sie während der Laufzeit der Reduct-Web-App Achtsamkeitsübungen in Ihren Alltag eingebaut haben.**

|                          |                          |                          |                          |                          |                          |
|--------------------------|--------------------------|--------------------------|--------------------------|--------------------------|--------------------------|
| <input type="checkbox"/> |
| 1                        | 2                        | 3                        | 4                        | 5                        | 6                        |
| (fast) nie               | Ca. einmal im Monat      | Mehrmals im Monat        | Ca. einmal in der Woche  | Mehrmals in der Woche    | (fast) täglich           |

**2) Konnten Sie die in der Reduct-Web-App erlernten Strategien/Skills in Ihren Alltag integrieren?**

|                          |                          |                          |                          |                          |                          |
|--------------------------|--------------------------|--------------------------|--------------------------|--------------------------|--------------------------|
| <input type="checkbox"/> |
| 1                        | 2                        | 3                        | 4                        | 5                        | 6                        |
| (fast) nie               | Ca. einmal im Monat      | Mehrmals im Monat        | Ca. einmal in der Woche  | Mehrmals in der Woche    | (fast) täglich           |

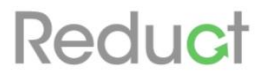

Liebe Teilnehmerin, lieber Teilnehmer,

Vielen Dank für Ihre Teilnahme an der ersten Befragung der Reduct Studie. Für die nächsten Schritte wird sich das Reduct Team in den nächsten Tagen bei Ihnen melden.

Sollten Sie Fragen haben, können Sie gerne jederzeit eine E-Mail an [reduct@uni-due.de](mailto:reduct@uni-due.de) senden.

Wir wünschen Ihnen alles Gute!

Ihr Reduct Team
