# Supplementary material for: Web-based mindfulness and skills-based distress reduction for patients with cancer: study protocol of the multicentre, randomised, controlled confirmatory intervention trial Reduct
Source: PubMed Central journal article supplement — BMJ Open. 2022 Jun 1;12(6):e056973. doi: 10.1136/bmjopen-2021-056973 (PMC9161102; doi:10.1136/bmjopen-2021-056973), 2022-06-01
Supplement: bmjopen-2021-056973supp003.pdf [file bmjopen-2021-056973supp003.pdf]

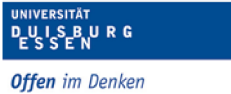

LVR-Klinikum Essen  
Kliniken und Institut der  
Universität Duisburg-Essen

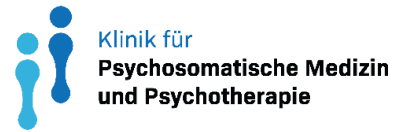

## Universitätsklinik für Psychosomatische Medizin und Psychotherapie

Direktor: Univ.-Prof. Dr. med. M. Teufel

# Reduct

### **Webbasierte Achtsamkeits- und Skills-basierte Belastungsreduktion für Patientinnen und Patienten mit Krebs: Eine multizentrische, randomisierte, kontrollierte Interventionsstudie (Reduct)**

(Web-based Mindfulness and Skills Based Distress Reduction for cancer patients: A multi-center, randomized, controlled intervention study (Reduct))

### **Einwilligungserklärung**

Ich wurde schriftlich und mündlich über die o. g. Studie aufgeklärt und alle meine Fragen wurden zu meiner Zufriedenheit beantwortet.

Ich nehme freiwillig an dieser Studie teil.

Ich weiß, dass ich meine Einwilligung zur Teilnahme an dieser Studie jederzeit ohne Angabe von Gründen und ohne Nachteile widerrufen kann.

Mir ist bewusst, dass für diese Studie keine Probandenversicherung abgeschlossen wurde, jedoch eine Wegeunfallversicherung (siehe Patienteninformation).

Ich weiß, dass ich jederzeit, beispielsweise im Falle eines Widerrufs, verlangen kann, dass meine bis dahin erhobenen Daten gelöscht oder anonymisiert werden.

**Ich erkläre mich einverstanden, dass im Rahmen der Studie erhobene Daten auf Fragebögen und/oder elektronischen Datenträgern aufgezeichnet und ohne Namensnennung (pseudonymisiert) ausgewertet werden dürfen. Außerdem bin ich damit einverstanden, dass die Studiendaten in anonymisierter Form für wissenschaftliche Darstellungen und Veröffentlichungen verwendet werden dürfen. Ein Bezug zu einer bestimmten Person kann hierbei nicht hergestellt werden.**

**Meine Daten dürfen pseudonymisiert, wie in der Informationsschrift beschrieben, im Rahmen der Studie, also nur an autorisierte Personen, die in die Datenschutzrichtlinien eingeführt sind, weitergegeben werden.**

Mit meiner Unterschrift willige ich zudem ein, dass mich das Studienteam per E-Mail und/oder telefonisch kontaktieren darf.

E-Mail-Adresse: \_\_\_\_\_

Telefonnummer: \_\_\_\_\_

Im Falle eines Studienabbruchs meinerseits erkläre ich mich damit einverstanden, per E-Mail und/oder telefonisch durch das Studienteam kontaktiert zu werden.

Falls Sie dieser Kontaktaufnahme zustimmen, würden Sie im Falle eines Studienabbruchs Ihrerseits eine E-Mail mit einem online-Link für einen kurzen Fragebogen erhalten.

- Ja  
 Nein

Eine Kopie der Informationsschrift, der Versicherungsbestätigung und Versicherungsbedingungen sowie der unterschriebenen Einwilligungserklärung habe ich erhalten.

\_\_\_\_\_  
Ort, Datum

\_\_\_\_\_  
Name in Druckbuchstaben

\_\_\_\_\_  
Unterschrift Teilnehmer\*in

Teilnehmer ID: \_\_\_\_\_ (wird vom Studienteam ausgefüllt)

\_\_\_\_\_  
Ort, Datum

\_\_\_\_\_  
Name in Druckbuchstaben

\_\_\_\_\_  
Unterschrift der  
aufklärenden Person
