# Supplementary material for: Web-based mindfulness and skills-based distress reduction for patients with cancer: study protocol of the multicentre, randomised, controlled confirmatory intervention trial Reduct
Source: PubMed Central journal article supplement — BMJ Open. 2022 Jun 1;12(6):e056973. doi: 10.1136/bmjopen-2021-056973 (PMC9161102; doi:10.1136/bmjopen-2021-056973), 2022-06-01
Supplement: bmjopen-2021-056973supp004.pdf [file bmjopen-2021-056973supp004.pdf]

### Supplementary Material III: Screenshots of the intervention

#### Navigation through the modules of the Make It Training

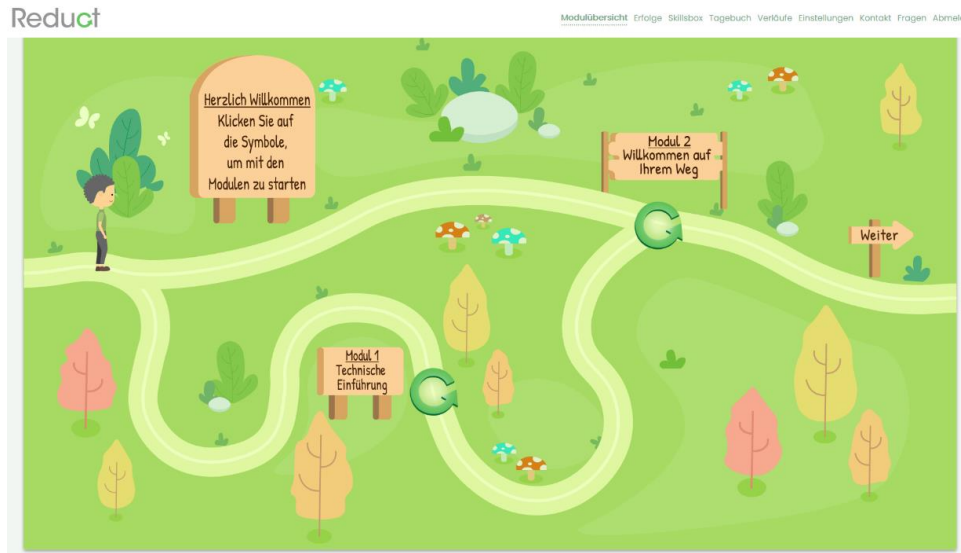

#### Weekly self-evaluation of current distress level, skills and mindfulness

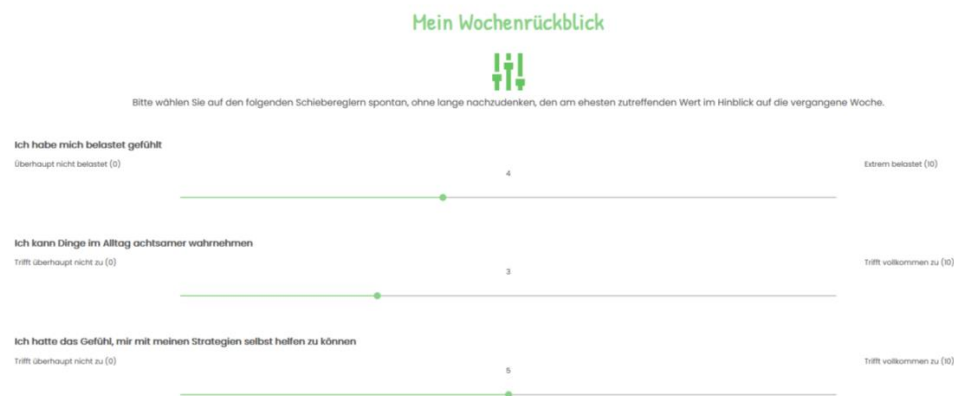

#### Visualization of the individual development of the self-evaluation over the weeks

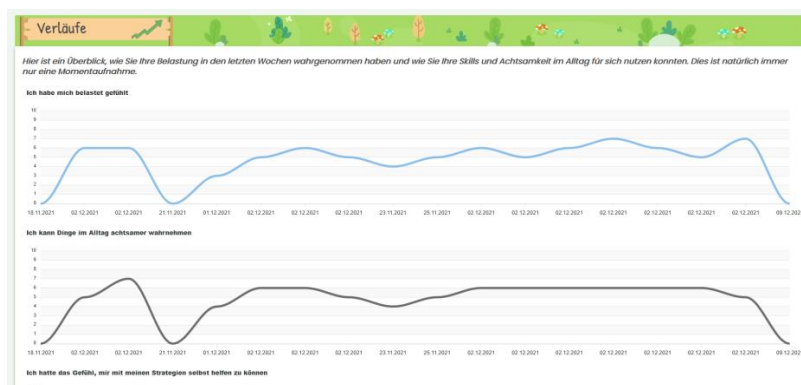

## Weekly Diary

**Mein Tagebuch**



Im Verlauf des Make It Trainings dürfen Sie immer wieder Ihre Aufmerksamkeit auch auf Dinge werfen, für die Sie dankbar sind oder über die Sie sich gefreut haben. Nehmen Sie sich nun kurz Zeit, um über die folgenden beiden Fragen nachzudenken:

Worüber habe ich mich in dieser Woche gefreut?

Antwort

Antwort

Wofür bin ich in dieser Woche dankbar?

Antwort

Antwort

---

**Tagebuch**

Hier können Sie die Einträge aus Ihrem Dankbarkeitstagebuch einsehen, es kann Freude bereiten sich diese immer wieder anzuschauen.

## Tutorial Videos

**Video: Das ABC-Modell**





 

## Interactive Skills Training

**Übung: Mein Selbstwerthaus**



Überlegen Sie hierunter, welche Erlebnisse, Menschen und Eigenschaften die Säulen Ihres Selbstwerthaus bilden.

|                                                                                            |                                                                                                |                                                                                        |                                                                                                      |
|--------------------------------------------------------------------------------------------|------------------------------------------------------------------------------------------------|----------------------------------------------------------------------------------------|------------------------------------------------------------------------------------------------------|
| <p><b>Selbstakzeptanz</b><br/>Was sind Ihre Stärken? Was würden andere über Sie sagen?</p> | <p><b>Selbstvertrauen</b><br/>Was ist Ihnen gelungen? Welche Fähigkeit hat dabei geholfen?</p> | <p><b>Soziale Kompetenz</b><br/>Welche sozialen Aktivitäten unternehmen Sie gerne?</p> | <p><b>Soziales Netz</b><br/>Welche Menschen sind Ihnen wichtig? Mit wem sind Sie gerne zusammen?</p> |
|--------------------------------------------------------------------------------------------|------------------------------------------------------------------------------------------------|----------------------------------------------------------------------------------------|------------------------------------------------------------------------------------------------------|

[Mein Selbstwerthaus herunterladen](#)



Hier finden Sie die Übung auch nochmal zum Herunterladen. Vielleicht möchten Sie Ihr Selbstwerthaus ausfüllen und irgendwo aufhängen?

## Downloadable audio guided mindfulness exercises

**Achtsamkeitsübung: Achtsames Atmen I – Den Atem beobachten**



0:00 / 2:31

## Downloadable mindfulness exercise plan

### Achtsame Momente im Alltag

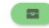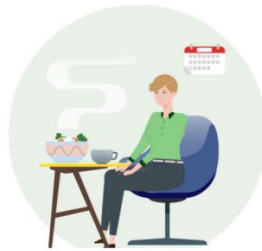

Wir hoffen, dass Ihnen die erste achtsame Übung gefallen hat. Falls es Ihnen noch schwer fiel, sich auf die Übung einzulassen, machen Sie sich keine Sorgen. So geht es anfangs den meisten. Mit regelmäßiger Übung fällt dies immer leichter. Es kann natürlich auch sein, dass Sie mal mit einer Achtsamkeitsübung weniger anfangen können. Wir werden Ihnen während des Make It Trainings verschiedene Achtsamkeitsübungen vorstellen. Mit Sicherheit wird die ein oder andere passende Übung für Sie dabei sein.

[Achtsamkeitsplan Willkommen herunterladen](#)

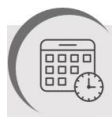

## Mein Achtsamkeitsplan

Wann möchten Sie in dieser Woche eine Achtsamkeitsübung machen? In welchen Alltagsmomenten möchten Sie achtsam sein?

|                 |                                                                                                                                                                                       |                                                                                                                                                                                                                                                                                                                                                                                                                             |                                                                                                                                                                                       |
|-----------------|---------------------------------------------------------------------------------------------------------------------------------------------------------------------------------------|-----------------------------------------------------------------------------------------------------------------------------------------------------------------------------------------------------------------------------------------------------------------------------------------------------------------------------------------------------------------------------------------------------------------------------|---------------------------------------------------------------------------------------------------------------------------------------------------------------------------------------|
| <b>MONTAG</b>   | <input type="checkbox"/> Morgens um      Uhr      Notizen:<br><input type="checkbox"/> Mittags um      Uhr      Notizen:<br><input type="checkbox"/> Abends um      Uhr      Notizen: | <b>DIENSTAG</b>                                                                                                                                                                                                                                                                                                                                                                                                             | <input type="checkbox"/> Morgens um      Uhr      Notizen:<br><input type="checkbox"/> Mittags um      Uhr      Notizen:<br><input type="checkbox"/> Abends um      Uhr      Notizen: |
| <b>MITTWOCH</b> | <input type="checkbox"/> Morgens um      Uhr      Notizen:<br><input type="checkbox"/> Mittags um      Uhr      Notizen:<br><input type="checkbox"/> Abends um      Uhr      Notizen: | <b>DONNERSTAG</b>                                                                                                                                                                                                                                                                                                                                                                                                           | <input type="checkbox"/> Morgens um      Uhr      Notizen:<br><input type="checkbox"/> Mittags um      Uhr      Notizen:<br><input type="checkbox"/> Abends um      Uhr      Notizen: |
| <b>FREITAG</b>  | <input type="checkbox"/> Morgens um      Uhr      Notizen:<br><input type="checkbox"/> Mittags um      Uhr      Notizen:<br><input type="checkbox"/> Abends um      Uhr      Notizen: | <b>SAMSTAG</b>                                                                                                                                                                                                                                                                                                                                                                                                              | <input type="checkbox"/> Morgens um      Uhr      Notizen:<br><input type="checkbox"/> Mittags um      Uhr      Notizen:<br><input type="checkbox"/> Abends um      Uhr      Notizen: |
| <b>SONNTAG</b>  | <input type="checkbox"/> Morgens um      Uhr      Notizen:<br><input type="checkbox"/> Mittags um      Uhr      Notizen:<br><input type="checkbox"/> Abends um      Uhr      Notizen: | <b>ACHTSAME ALLTAGSMOMENTE</b> <div style="display: flex; justify-content: space-between;"> <div> <input type="checkbox"/> Frühstück<br/> <input type="checkbox"/> Spaziergang<br/> <input type="checkbox"/> _____                             </div> <div> <input type="checkbox"/> Zähneputzen<br/> <input type="checkbox"/> Zeitungslernen<br/> <input type="checkbox"/> _____                             </div> </div> |                                                                                                                                                                                       |

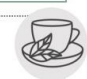

## Skillsbox: Individualized collection of helpful information and exercises

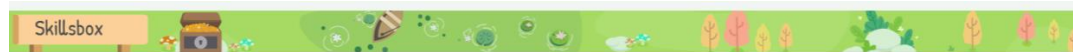

Schlaf (Donnerstag, 02.12.21)

Modul 7: Schlaf

Donnerstag, 02.12.21

18 / 27

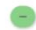

### Übung: Meine Abendroutine

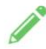

Wie Herr Prof. Dr. Schöbel erläutert hat, besteht eine Möglichkeit, um besser abschalten zu können, in einer festen Abendroutine. Wir möchten Sie nun einladen, Ihre eigene Abendroutine zu gestalten.

Zu welcher Zeit möchten Sie zu Bett gehen und zu welcher Zeit möchten Sie mit dieser Routine beginnen? Welche Rituale können Ihnen dabei helfen, sich auf das Zubettgehen einzustimmen?

Meine Abendroutine

Lesen  
Meditation/ Yoga  
Skincare

Stressmanagement (Dienstag, 07.12.21)

Modul 12: Stressmanagement

Dienstag, 07.12.21

17 / 27

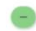

### Übung: Meine Mutsätze

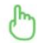

Wir haben Ihnen eine Liste mit Mutsätzen vorbereitet. Vielleicht gefällt Ihnen der eine oder andere Satz. Oder vielleicht gibt es schon einen Satz, der Ihnen bereits in anderen Stresssituationen geholfen hat. Gerne können Sie diesen Satz auch in ein freies Feld schreiben. Die Sätze werden dann in Ihrer Skillsbox abgelegt. Wählen Sie nun bitte Ihre persönlichen Mutsätze aus.

Ich kann auf mich zählen.
